# Supplementary material for: Dietary leucine and fish oil cooperatively regulate skeletal myofiber type transformationviathe CaMKII signaling pathway of pigs
Source: Royal Society of Chemistry journal article supplement (doi:10.1039/d2fo03338k), 2022-12-09
Supplement: d2fo03338k1.xlsx [file d2fo03338k1.xlsx]

## Sheet:  sheet1
MS2.name	MS2.score	level	MS1.name	MS1.ppm	rtmed	mzmed	type	BJA3	BJA4	BJA5	BJA6	BJA7	BJA8	BJA9	BJD9	BJB3	BJB4	BJB5	BJB6	BJB7	BJB8	BJB9	BJA10	BJC1	BJC2	BJC3	BJC4	BJC5	BJC6	BJC7	BJB10	BJD1	BJD2	BJD3	BJD4	BJD5	BJD7	BJD8	BJC8	QC01	QC02	QC03	QC04	QC05
Pyridine	1	B(ii)			523.689	80.0501	forward	1.09393e+06	3.21671e+06	2.32265e+06	1.95749e+06	5.12195e+06	3.14525e+06	2.82069e+06	2.23724e+06	2.39452e+06	3.13977e+06	814166	3.57008e+06	4.42283e+06	3.17264e+06	2.20427e+06	2.81573e+06	3.97707e+06	3.50627e+06	3.11344e+06	3.01164e+06	3.32493e+06	3.00291e+06	2.82987e+06	2.32518e+06	3.05666e+06	2.99631e+06	2.67842e+06	4.92804e+06	3.25812e+06	2.82062e+06	2.98297e+06	3.55935e+06	3.45579e+06	2.89492e+06	2.30807e+06	1.64076e+06	3.14138e+06
Acrylic acid	1	B(ii)			372.099	71.0128	forward	6.42703e+06	7.3895e+06	6.21524e+06	7.49481e+06	8.68315e+06	8.35491e+06	1.35279e+07	5.5954e+06	6.61282e+06	5.44653e+06	7.32672e+06	4.97768e+06	7.86585e+06	8.41985e+06	6.58863e+06	6.32867e+06	4.30927e+06	3.94436e+06	5.14809e+06	6.91386e+06	8.02537e+06	6.70079e+06	7.30358e+06	6.82592e+06	7.59393e+06	7.16962e+06	7.13774e+06	7.6832e+06	8.42201e+06	7.48067e+06	5.4e+06	5.72875e+06	7.41038e+06	7.67757e+06	1.03847e+07	7.29494e+06	7.01309e+06
D-2,3-Dihydroxypropanoic acid	1	B(ii)			452.096	105.018	forward	996143	1.01245e+06	1.03473e+06	1.24287e+06	932840	956199	1.01805e+06	1.02441e+06	1.28115e+06	1.08373e+06	1.00026e+06	1.01156e+06	1.12234e+06	953262	1.01571e+06	1.06919e+06	1.12524e+06	1.00712e+06	773159	824029	1.14383e+06	1.00075e+06	950529	1.06283e+06	925764	1.36195e+06	2.05195e+06	1.14571e+06	1.04296e+06	1.06627e+06	945850	825003	1.09371e+06	1.10292e+06	1.94728e+06	1.14598e+06	1.08233e+06
Glycine	1	B(ii)			193.719	74.0237	forward	4.06548e+06	4.73687e+06	3.71877e+06	3.35584e+06	4.27172e+06	3.54697e+06	3.07399e+06	4.26336e+06	4.73697e+06	4.29906e+06	2.97016e+06	4.92691e+06	4.27648e+06	3.71652e+06	4.62702e+06	4.73778e+06	5.39947e+06	4.41392e+06	2.59708e+06	3.37101e+06	3.37362e+06	2.53565e+06	3.38457e+06	4.69995e+06	3.688e+06	2.39183e+06	6.69084e+06	2.87907e+06	6.25828e+06	3.65873e+06	3.13712e+06	3.36767e+06	4.26989e+06	4.11088e+06	4.88053e+06	4.2649e+06	3.74158e+06
Glyoxylic acid	1	B(ii)			328.119	72.9921	forward	9.45118e+06	5.59051e+06	7.33838e+06	1.36312e+07	8.81537e+06	6.99422e+06	8.41431e+06	7.24484e+06	6.72972e+06	1.12602e+07	1.27336e+07	1.68562e+07	9.48205e+06	1.07002e+07	7.98901e+06	1.77384e+07	8.15782e+06	1.60355e+07	7.26458e+06	1.03246e+07	1.044e+07	8.06804e+06	9.50097e+06	8.28379e+06	8.36836e+06	7.8996e+06	1.318e+07	1.10199e+07	6.90687e+06	1.40232e+07	7.30502e+06	8.42887e+06	1.01393e+07	8.98728e+06	7.39567e+06	9.56777e+06	8.56652e+06
Pyruvic acid	1	B(ii)			268.095	87.0078	forward	6.47253e+07	8.37713e+07	7.00442e+07	6.78571e+07	7.45374e+07	7.40958e+07	9.0982e+07	6.21826e+07	5.75984e+07	1.52718e+07	3.77828e+07	7.58725e+07	6.774e+07	7.56543e+07	6.31082e+07	6.86622e+07	7.44226e+07	1.73082e+07	6.78263e+07	6.86665e+07	6.46696e+07	1.38009e+07	6.771e+07	7.83097e+07	6.16099e+07	7.98409e+07	8.26276e+07	6.29384e+07	6.63044e+07	8.55817e+07	7.40059e+07	7.18306e+07	6.47535e+07	4.14789e+07	9.01276e+07	6.92924e+07	7.01646e+07
L-Lactic acid	0.99999	B(ii)			224.818	89.0232	forward	2.6562e+10	2.28445e+10	2.79772e+10	2.60463e+10	2.36777e+10	2.63727e+10	2.31577e+10	2.08283e+10	1.86619e+10	2.44582e+10	2.34504e+10	2.49917e+10	2.24618e+10	2.55164e+10	2.19357e+10	2.52857e+10	2.43533e+10	2.37345e+10	2.52889e+10	2.35825e+10	2.44848e+10	2.41629e+10	2.36259e+10	2.59944e+10	1.97139e+10	2.57413e+10	2.11058e+10	2.45904e+10	2.22597e+10	2.28035e+10	2.40963e+10	2.2062e+10	2.40852e+10	2.54469e+10	2.41198e+10	2.65564e+10	2.54296e+10
D-Alanine	0.999985	B(ii)			369.853	88.0393	forward	2.24547e+09	2.22019e+09	2.27647e+09	2.15405e+09	2.20723e+09	2.26061e+09	2.17943e+09	2.24092e+09	1.89693e+09	2.07852e+09	2.13971e+09	2.32388e+09	2.0695e+09	2.14569e+09	2.30331e+09	2.23052e+09	2.08835e+09	2.32884e+09	1.9732e+09	2.23946e+09	1.96152e+09	2.11621e+09	2.1424e+09	2.0132e+09	1.67757e+09	2.13176e+09	2.08522e+09	2.09653e+09	2.23617e+09	2.02364e+09	2.09459e+09	2.30202e+09	2.27481e+09	2.21579e+09	2.21867e+09	2.24747e+09	2.24874e+09
Dodecanoic acid	0.999966	B(ii)			35.5913	199.17	forward	1.58042e+07	3.69942e+07	2.31434e+07	2.29033e+07	4.77474e+07	3.99094e+07	1.6142e+08	1.98427e+07	2.31411e+07	2.08288e+07	1.66134e+07	2.13636e+07	6.58516e+07	1.81754e+07	2.68241e+07	5.95689e+07	3.9528e+07	1.89557e+07	2.28463e+07	2.49341e+07	1.64584e+07	3.57635e+07	6.8952e+07	2.30808e+07	3.42371e+08	1.956e+07	2.40631e+07	1.97706e+07	2.39122e+07	3.86408e+07	3.04171e+07	1.70281e+07	5.7665e+07	6.35153e+07	5.92303e+07	6.20646e+07	7.16712e+07
5-Aminopentanoic acid	0.999962	B(ii)			292.418	118.086	forward	6.933e+09	6.48778e+09	6.69556e+09	6.24795e+09	6.1113e+09	7.08509e+09	7.00871e+09	7.04603e+09	6.44925e+09	5.91289e+09	7.4644e+09	6.98394e+09	7.14328e+09	5.45323e+09	6.2769e+09	6.18682e+09	6.4659e+09	5.83594e+09	6.65025e+09	6.29933e+09	6.46244e+09	6.99023e+09	7.95317e+09	7.0754e+09	6.20329e+09	6.96434e+09	5.76411e+09	6.11647e+09	5.72682e+09	5.42322e+09	7.32151e+09	7.63493e+09	6.57293e+09	6.93677e+09	6.43224e+09	6.44037e+09	6.75365e+09
Inosinic acid	0.999945	B(ii)			587.731	349.055	forward	5.07958e+06	2.38396e+06	3.65029e+06	2.95729e+06	3.13614e+06	2.95046e+06	2.16155e+06	2.04905e+06	2.23849e+06	3.02831e+06	3.09585e+06	3.53389e+06	2.60832e+06	3.76577e+06	3.28832e+06	2.61288e+06	2.67733e+06	2.6804e+06	2.8057e+06	2.76376e+06	2.75563e+06	2.41226e+06	5.70488e+06	2.81696e+06	2.17446e+06	2.81799e+06	2.22286e+06	2.86692e+06	2.87256e+06	2.88813e+06	2.44927e+06	2.371e+06	3.24793e+06	3.40734e+06	2.66394e+06	3.19708e+06	3.05048e+06
16-Methylheptadecanoic acid	0.999896	B(ii)			39.1257	283.264	forward	4.15391e+08	1.9299e+09	9.54107e+08	1.14504e+09	9.30667e+08	1.13897e+09	1.42369e+09	1.3926e+09	1.94185e+09	7.83986e+08	3.0246e+08	3.73994e+08	7.86005e+08	4.99802e+08	1.50734e+09	2.37293e+09	1.44713e+09	7.10302e+08	1.26306e+09	9.63307e+08	4.21377e+08	1.62164e+09	2.56509e+09	1.00597e+09	5.66633e+09	7.46658e+08	6.07692e+08	8.95068e+08	5.63295e+08	8.81896e+08	1.51089e+09	1.9486e+09	9.17299e+08	2.46176e+09	2.26201e+09	2.34674e+09	2.54417e+09
cis-Vaccenic acid	0.999814	B(ii)			37.307	281.249	forward	2.49806e+08	1.01508e+09	7.51699e+08	1.05348e+09	1.36137e+09	1.28481e+09	1.4656e+09	8.98322e+08	1.80934e+09	5.98722e+08	2.8808e+08	1.06004e+09	9.94836e+08	6.26622e+08	9.81101e+08	6.64476e+08	1.36252e+09	4.72853e+08	1.32365e+09	9.92366e+08	6.77616e+08	1.62168e+09	1.19456e+09	1.06292e+09	2.69974e+09	5.02332e+08	1.23476e+09	7.0114e+08	9.58762e+08	1.66544e+09	1.44144e+09	2.32741e+09	1.34308e+09	1.43793e+09	1.34457e+09	1.3926e+09	1.53903e+09
Beta-Aminopropionitrile	0.999752	B(ii)			33.985	71.061	forward	576991	994883	926050	703383	584769	583014	738182	857514	684075	660665	659662	1.42918e+06	1.09101e+06	814611	678936	729594	569918	635738	606793	834599	502749	599779	961103	773112	473645	652807	453097	836480	673301	760486	1.04595e+06	888192	518192	726124	527282	600863	539910
(R)-3-Hydroxybutyric acid	0.999751	B(ii)			390.382	103.039	forward	544137	657369	926002	673536	844932	1.01727e+06	754993	835245	1.88003e+06	1.50272e+06	968934	758907	1.58729e+06	857361	1.39296e+06	1.4065e+06	703753	1.15148e+06	958278	747871	713997	1.60912e+06	580629	762324	875294	796016	607678	2.25108e+06	1.37684e+06	616849	832936	1.01717e+06	941889	897998	817096	598063	887077
3-Hydroxybutyric acid	0.999741	B(ii)			193.4	103.039	forward	9.25062e+06	4.31249e+07	3.61598e+07	2.65839e+07	1.96164e+08	3.56301e+08	2.08055e+08	1.58433e+08	1.8636e+07	2.86949e+07	2.52162e+07	2.01718e+07	4.28596e+07	4.81739e+07	1.90448e+08	4.1858e+07	3.08829e+07	5.83649e+06	3.69449e+07	2.61121e+07	5.3004e+07	5.19431e+07	4.6363e+07	6.33782e+07	2.44057e+07	2.6346e+07	2.48334e+07	4.13085e+07	2.43669e+07	5.32793e+07	1.72055e+08	2.33658e+08	7.33779e+07	9.00343e+07	8.63445e+07	6.77751e+07	7.74665e+07
Oleic acid	0.999701	B(ii)			198.444	281.249	forward	1.88018e+07	2.13468e+07	2.6138e+07	4.06635e+07	4.45939e+07	4.866e+07	1.00008e+08	5.14935e+07	2.36269e+07	2.93482e+07	2.16373e+07	1.54188e+07	3.48053e+07	5.01569e+07	5.6241e+07	2.90339e+07	1.91571e+07	1.10119e+07	3.01184e+07	2.65291e+07	4.94174e+07	4.93719e+07	2.9779e+07	3.3374e+07	2.13351e+07	2.51451e+07	2.75334e+07	2.25572e+07	2.39964e+07	2.19215e+07	3.10506e+07	3.97239e+07	3.71975e+07	3.69867e+07	3.82307e+07	3.81806e+07	3.6744e+07
Adenine	0.999674	B(ii)			440.651	136.062	forward	3.2855e+08	2.617e+08	2.17418e+08	1.54662e+08	2.15343e+08	1.42674e+08	2.38325e+08	3.31177e+08	4.88231e+08	1.61464e+08	2.59312e+08	1.32434e+08	2.64297e+08	2.0699e+08	2.9124e+08	2.70526e+08	2.99678e+08	2.78326e+08	2.92747e+08	1.96595e+08	2.05883e+08	2.14888e+08	2.53367e+08	1.32926e+08	1.04007e+08	2.01932e+08	3.75801e+08	2.03528e+08	2.22699e+08	1.73007e+08	1.07018e+08	4.38006e+08	1.72627e+08	2.17664e+08	2.01982e+08	2.40582e+08	2.31237e+08
L-Norleucine	0.999657	B(ii)			295.502	130.086	forward	5.49362e+07	8.80538e+07	6.05948e+07	8.25231e+07	1.08679e+08	1.53896e+08	1.67529e+08	1.00833e+08	6.51331e+07	6.00817e+07	5.96016e+07	7.00753e+07	8.16754e+07	1.06641e+08	9.88159e+07	7.60137e+07	4.88652e+07	5.05834e+07	4.93113e+07	6.63806e+07	8.56579e+07	6.7421e+07	8.52185e+07	7.3833e+07	5.86411e+07	7.9543e+07	5.58684e+07	7.24198e+07	7.46414e+07	7.2355e+07	1.15393e+08	1.30075e+08	9.17446e+07	8.56248e+07	8.94951e+07	9.82361e+07	1.00296e+08
Creatinine	0.999577	B(ii)			181.692	112.05	forward	1.46497e+09	1.9042e+09	1.61854e+09	1.35681e+09	1.64921e+09	1.83451e+09	1.3603e+09	1.78048e+09	1.29674e+09	1.17272e+09	1.23258e+09	1.51372e+09	1.44134e+09	1.48855e+09	1.73348e+09	1.58615e+09	1.60028e+09	1.55481e+09	1.63777e+09	1.42779e+09	1.19745e+09	1.44408e+09	1.5608e+09	1.35858e+09	8.84118e+08	1.47645e+09	1.07704e+09	1.14222e+09	1.0909e+09	1.21632e+09	1.6505e+09	1.67864e+09	1.50205e+09	1.52229e+09	1.54705e+09	1.57905e+09	1.59303e+09
1-Pyrroline	0.999548	B(ii)			331.318	70.0657	forward	9.40074e+06	1.79826e+07	6.39326e+06	1.36994e+07	4.89804e+06	5.86787e+06	3.48934e+06	4.97891e+06	1.18524e+07	1.16791e+07	6.82176e+06	1.37471e+07	1.19335e+07	1.10347e+07	6.21498e+06	1.6563e+07	6.34762e+06	1.31997e+07	2.94114e+06	1.18672e+07	7.31809e+06	4.00062e+06	7.38769e+06	3.51566e+06	1.29002e+07	6.15498e+06	1.32692e+07	6.54411e+06	4.42329e+06	1.20541e+07	3.65427e+06	5.3695e+06	9.79983e+06	8.65006e+06	1.13904e+07	8.78712e+06	8.16078e+06
Isolithocholic acid	0.999536	B(ii)			57.7884	375.291	forward	1.23646e+06	6.17653e+06	730406	957972	1.59586e+06	9.95362e+06	2.11837e+06	1.36732e+06	1.07304e+07	476544	523841	909796	1.78874e+06	1.63282e+06	4.49157e+06	1.24549e+06	5.68531e+06	1.17226e+06	5.86558e+06	3.67962e+06	664245	2.47499e+06	1.68054e+06	290897	3.03847e+07	1.08892e+06	7.57302e+06	330436	4.39592e+06	1.61664e+07	2.39549e+06	938646	4.17584e+06	4.19524e+06	4.46652e+06	4.13814e+06	4.58932e+06
Cytidine	0.999534	B(ii)			257.271	244.093	forward	5.41614e+06	7.86347e+06	7.55883e+06	9.16255e+06	9.8228e+06	1.26476e+07	2.75143e+07	8.0692e+06	9.16633e+06	7.65225e+06	8.1589e+06	8.13461e+06	1.04162e+07	1.24346e+07	8.96442e+06	5.47125e+06	5.12096e+06	6.23319e+06	5.48869e+06	9.88818e+06	1.23212e+07	9.69828e+06	1.04623e+07	9.097e+06	5.59494e+06	5.51371e+06	5.48575e+06	8.81581e+06	1.05366e+07	1.21642e+07	5.70074e+06	1.00125e+07	7.94493e+06	1.00998e+07	1.01473e+07	9.8436e+06	1.01334e+07
Thiamine	0.999502	B(ii)			406.809	265.112	forward	2.54278e+07	9.75013e+06	7.05367e+06	1.69559e+07	1.62545e+07	1.02961e+07	1.90073e+07	7.21508e+06	1.5404e+07	7.63659e+06	6.72006e+06	7.36867e+06	1.2999e+07	1.1918e+07	1.04601e+07	1.33221e+07	1.30118e+07	1.02629e+07	1.07302e+07	5.41332e+06	1.14236e+07	1.1945e+07	8.97042e+06	9.82848e+06	1.41789e+07	1.46365e+07	1.22571e+07	9.17888e+06	1.97753e+07	9.63664e+06	2.05497e+07	1.0408e+07	1.16667e+07	1.06814e+07	1.04128e+07	1.13831e+07	1.08271e+07
Eicosadienoic acid	0.999494	B(ii)			37.2339	307.264	forward	1.85025e+07	3.0972e+07	3.22992e+07	4.59847e+07	4.50254e+07	7.6695e+07	3.22885e+07	2.64751e+07	3.44204e+07	1.77445e+07	1.23057e+07	1.88902e+07	2.32965e+07	2.79282e+07	2.56201e+07	2.78778e+07	4.17353e+07	1.97267e+07	4.491e+07	3.96458e+07	4.14562e+07	7.08979e+07	3.97368e+07	5.24495e+07	8.34984e+07	1.49366e+07	3.26614e+07	2.00364e+07	2.20507e+07	3.5171e+07	3.75965e+07	1.11673e+08	3.76918e+07	4.02523e+07	4.05017e+07	4.33851e+07	4.43069e+07
Choline	0.999492	B(ii)			313.146	104.107	forward	2.45903e+09	1.68112e+09	1.50272e+09	1.28834e+09	1.7677e+09	1.31431e+09	1.4165e+09	1.61467e+09	2.24997e+09	1.38086e+09	1.39405e+09	1.32555e+09	2.86684e+09	2.8983e+09	2.32797e+09	2.03945e+09	2.23366e+09	1.03405e+09	2.06725e+09	1.28371e+09	2.67447e+09	1.97378e+09	2.84466e+09	3.72223e+09	2.02658e+09	1.85023e+09	1.59751e+09	1.4782e+09	1.95429e+09	1.64058e+09	1.59659e+09	2.66357e+09	2.31917e+09	2.08081e+09	1.93884e+09	2.19477e+09	2.10991e+09
Phosphocreatine	0.999469	B(ii)			443.082	210.028	forward	1.20041e+08	9.24925e+07	3.71535e+06	1.38361e+06	5.07302e+07	1.66405e+07	8.69324e+07	1.93657e+08	1.8827e+08	1.04662e+06	8.93887e+07	280291	8.64816e+07	1.08784e+08	1.58238e+08	8.36507e+07	4.07285e+07	4.54356e+06	4.22736e+07	5.82768e+07	6.98407e+07	3.72429e+07	1.11433e+08	1.87248e+06	2.71942e+07	2.67542e+07	1.06807e+08	3.13823e+07	2.56473e+07	5.83136e+07	2.06834e+07	1.12028e+08	6.83055e+07	6.85602e+07	6.9894e+07	7.09633e+07	6.94338e+07
D-Proline	0.99936	B(ii)			331.325	116.071	forward	9.35354e+08	2.34224e+09	8.69849e+08	1.75817e+09	6.20735e+08	1.2568e+09	5.07632e+08	9.38893e+08	1.90705e+09	9.57081e+08	1.5001e+09	1.68703e+09	1.17824e+09	9.43156e+08	5.30284e+08	2.6887e+09	8.48004e+08	1.20441e+09	4.74626e+08	1.03491e+09	1.52328e+09	7.83965e+08	8.35973e+08	6.10335e+08	1.364e+09	7.97312e+08	1.46885e+09	9.57378e+08	6.38403e+08	2.11918e+09	5.75633e+08	7.25766e+08	1.32844e+09	1.57672e+09	1.05874e+09	1.04682e+09	1.57166e+09
Pipecolic acid	0.999352	B(ii)			326.778	130.086	forward	1.49497e+07	1.43314e+07	7.59003e+06	1.78679e+07	4.44857e+06	1.10379e+07	5.50201e+06	8.30106e+06	1.63511e+07	1.44667e+07	1.35853e+07	1.93223e+07	1.87283e+07	1.55877e+07	9.92693e+06	1.66876e+07	1.23118e+07	1.4397e+07	4.90834e+06	1.05221e+07	9.5135e+06	9.14855e+06	1.09256e+07	6.21797e+06	1.50895e+07	7.74679e+06	1.52189e+07	1.39382e+07	1.2888e+07	1.88884e+07	5.57669e+06	1.03892e+07	1.25218e+07	1.36846e+07	1.17649e+07	1.30413e+07	1.2867e+07
L-Proline	0.999327	B(ii)			329.763	114.055	forward	9.18151e+07	1.86807e+08	5.53472e+07	1.25174e+08	6.72114e+07	6.87733e+07	5.46542e+07	5.08059e+07	1.40331e+08	1.02062e+08	8.96174e+07	1.98801e+08	1.02176e+08	9.79531e+07	4.71333e+07	2.01722e+08	7.91777e+07	1.3388e+08	4.3842e+07	1.08766e+08	1.08806e+08	6.11495e+07	8.60578e+07	6.21134e+07	1.32983e+08	1.10322e+08	1.54458e+08	1.04819e+08	7.19348e+07	1.56613e+08	5.15317e+07	6.47612e+07	9.86661e+07	1.04986e+08	1.04405e+08	1.10254e+08	1.11972e+08
5H-Cyclopentapyrazine	0.999326	B(ii)			700.267	119.061	forward	7.29517e+06	9.70297e+06	5.67904e+06	1.10736e+07	1.3642e+07	1.12645e+07	9.46876e+06	8.66275e+06	1.30914e+07	1.3476e+07	9.5729e+06	9.43704e+06	9.71072e+06	8.42526e+06	1.07493e+07	7.199e+06	1.10161e+07	9.92616e+06	1.43575e+07	1.21271e+07	2.13948e+07	8.48141e+06	8.13073e+06	8.67049e+06	7.10795e+06	8.71436e+06	1.08808e+07	1.09307e+07	9.20664e+06	1.95036e+07	9.88091e+06	9.28059e+06	1.06786e+07	9.72906e+06	1.48303e+07	8.64938e+06	1.13703e+07
L-Malic acid	0.999228	B(ii)			413.721	133.013	forward	9.44548e+07	1.59729e+08	1.04615e+08	7.32821e+07	1.66039e+08	1.29434e+08	1.85937e+08	1.4205e+08	1.11944e+08	5.91628e+07	8.37843e+07	6.94743e+07	1.07526e+08	1.99612e+08	1.20868e+08	1.23326e+08	7.30214e+07	5.2447e+07	9.07465e+07	2.54576e+08	1.12048e+08	1.03477e+08	1.31083e+08	5.79091e+07	5.68414e+07	1.03006e+08	1.34149e+08	1.27956e+08	1.32799e+08	1.56505e+08	6.88419e+07	8.64869e+07	1.32502e+08	8.30866e+07	9.42372e+07	9.67467e+07	1.16136e+08
L-Valine	0.999225	B(ii)			319.937	118.086	forward	1.65563e+08	3.45445e+08	3.65136e+08	3.43239e+08	5.36473e+08	5.48632e+08	4.608e+08	4.25593e+08	3.30979e+08	3.60836e+08	2.031e+08	3.74641e+08	1.81866e+08	4.37902e+08	3.80645e+08	3.19259e+08	1.83471e+08	2.48155e+08	3.47293e+08	3.28109e+08	2.95299e+08	3.41118e+08	4.36819e+08	2.99016e+08	2.83439e+08	1.99861e+08	2.89747e+08	3.20573e+08	2.79037e+08	2.73953e+08	4.32916e+08	4.21261e+08	3.6939e+08	3.59964e+08	3.86951e+08	3.68056e+08	3.65254e+08
Isohyodeoxycholic acid	0.999109	B(ii)			165.852	391.286	forward	1.30746e+07	9.44011e+06	9.66547e+06	5.92938e+06	6.19671e+06	5.87743e+06	5.49709e+06	1.43714e+06	5.42869e+06	3.77548e+06	4.29169e+06	3.62035e+06	9.70718e+06	2.87708e+06	5.18509e+06	2.2882e+06	6.59601e+06	9.24475e+06	1.83945e+06	2.16315e+06	5.71623e+06	1.44399e+06	4.10123e+06	1.03253e+07	1.98221e+07	8.4836e+06	7.54078e+06	8.83675e+06	3.03164e+06	9.95765e+06	4.78022e+06	3.83912e+06	6.53452e+06	6.57731e+06	7.70894e+06	7.00034e+06	7.7654e+06
Arachidonic acid	0.999071	B(ii)			37.1535	303.233	forward	5.97067e+07	1.24046e+08	1.03381e+08	1.42538e+08	1.6782e+08	1.86067e+08	1.14295e+08	1.29345e+08	1.48894e+08	8.59578e+07	5.98575e+07	8.77556e+07	1.23146e+08	1.20449e+08	1.22305e+08	1.64496e+08	1.98718e+08	4.66778e+07	1.5316e+08	1.4735e+08	1.69193e+08	2.53392e+08	1.6791e+08	1.8991e+08	6.62502e+08	7.55816e+07	1.64902e+08	1.28023e+08	9.63126e+07	1.55057e+08	1.33827e+08	2.97948e+08	1.79793e+08	2.03337e+08	1.71833e+08	1.87593e+08	2.11384e+08
Phosphoric acid	0.998883	B(ii)			461.562	98.9846	forward	2.54177e+07	2.18074e+07	2.94404e+07	2.09088e+07	2.72188e+07	2.05806e+07	2.12022e+07	2.21921e+07	2.05167e+07	1.5716e+07	1.7781e+07	2.33655e+07	2.33292e+07	2.32151e+07	2.38974e+07	2.69501e+07	1.95129e+07	2.50017e+07	1.38361e+07	2.02584e+07	1.64496e+07	1.33476e+07	1.86151e+07	2.00475e+07	1.25675e+07	1.71984e+07	2.0558e+07	1.65493e+07	2.75251e+07	2.36958e+07	1.81982e+07	1.80814e+07	2.07308e+07	2.1392e+07	2.36432e+07	2.33209e+07	2.38057e+07
Niacinamide	0.998865	B(ii)			58.0432	123.055	forward	1.66744e+09	1.14883e+09	2.11405e+09	1.9223e+09	2.4713e+09	1.63104e+09	1.99435e+09	8.79649e+08	1.51533e+09	2.43623e+09	1.63012e+09	1.89682e+09	2.38022e+09	2.25766e+09	1.76037e+09	2.31842e+09	1.61714e+09	5.35021e+08	1.98625e+09	1.46315e+09	1.92155e+09	2.41731e+09	1.79889e+09	2.21386e+09	1.84871e+09	2.37556e+09	1.56785e+09	2.36425e+09	2.00896e+09	1.03051e+09	1.31492e+09	2.04549e+09	1.82965e+09	2.18311e+09	2.09414e+09	1.98402e+09	1.97971e+09
L-Leucine	0.998826	B(ii)			284.173	130.086	forward	6.1676e+07	9.81841e+07	6.76827e+07	8.16565e+07	1.04208e+08	1.5471e+08	1.71257e+08	9.45723e+07	6.36309e+07	7.0176e+07	5.91175e+07	7.78158e+07	8.10527e+07	1.16032e+08	8.63128e+07	6.85098e+07	5.4254e+07	7.36021e+07	5.24928e+07	7.29835e+07	9.54345e+07	6.85385e+07	7.94752e+07	7.37399e+07	7.95191e+07	1.10568e+08	7.70864e+07	9.44673e+07	9.06457e+07	1.08435e+08	1.22917e+08	1.28711e+08	9.19463e+07	9.6548e+07	9.37092e+07	9.53316e+07	9.94346e+07
Cytosine	0.998788	B(ii)			222.323	112.051	forward	6.27931e+07	5.87094e+07	6.66444e+07	6.17837e+07	6.58465e+07	5.90071e+07	7.75735e+07	6.57218e+07	7.0046e+07	5.76717e+07	6.08179e+07	6.47915e+07	6.20622e+07	7.40395e+07	1.08898e+08	6.85764e+07	7.19957e+07	4.97315e+07	5.57076e+07	6.70648e+07	6.55345e+07	6.22589e+07	6.18244e+07	6.85481e+07	5.16011e+07	6.085e+07	5.84677e+07	6.16365e+07	7.59325e+07	6.04889e+07	6.29517e+07	8.27745e+07	5.11627e+07	6.77453e+07	6.93533e+07	6.76876e+07	6.93736e+07
Propionic acid	0.998679	B(ii)			383.17	73.0284	forward	4.61415e+07	5.28644e+07	5.90665e+07	6.57964e+07	3.99454e+07	4.41428e+07	6.59954e+07	3.74314e+07	6.07353e+07	4.90277e+07	6.45515e+07	5.29885e+07	4.20303e+07	5.73087e+07	4.19807e+07	3.77238e+07	3.6809e+07	4.90043e+07	3.86773e+07	4.92151e+07	5.77706e+07	4.17489e+07	5.96969e+07	6.28537e+07	3.41456e+07	4.99604e+07	4.37217e+07	6.31681e+07	6.11434e+07	4.36915e+07	3.14079e+07	4.26187e+07	4.9467e+07	4.9028e+07	5.05594e+07	5.14661e+07	5.24762e+07
Hypoxanthine	0.99863	B(ii)			155.318	137.046	forward	9.96259e+06	4.2942e+07	3.53964e+07	3.0454e+07	3.47435e+07	3.97242e+07	3.29978e+07	3.29383e+07	3.08095e+07	3.03276e+07	6.91737e+07	3.73336e+07	2.99774e+07	5.99387e+07	3.83047e+07	3.00922e+07	4.24647e+07	6.33793e+07	3.65214e+07	4.91512e+07	3.16529e+07	3.11013e+07	3.81212e+07	4.2392e+07	4.23666e+07	3.14602e+07	2.33659e+07	3.07347e+07	6.05061e+07	7.69583e+07	3.7595e+07	1.03829e+07	4.21031e+07	4.3831e+07	3.55748e+07	3.30428e+07	3.53545e+07
Glycolic acid	0.998535	B(ii)			228.226	75.0077	forward	1.41303e+07	1.43536e+07	1.69572e+07	1.36602e+07	1.476e+07	1.67002e+07	1.42443e+07	1.5223e+07	1.38485e+07	1.70964e+07	2.35817e+07	1.58096e+07	1.40662e+07	1.80072e+07	1.48539e+07	1.37536e+07	1.27016e+07	1.47861e+07	1.65061e+07	1.50523e+07	1.54849e+07	1.32492e+07	1.49708e+07	1.47414e+07	1.63466e+07	1.64344e+07	1.4481e+07	1.4629e+07	1.34309e+07	2.17718e+07	1.47717e+07	1.44814e+07	1.85098e+07	1.16855e+07	1.47033e+07	1.55359e+07	1.55668e+07
Pyrrolidonecarboxylic acid	0.998517	B(ii)			405.559	130.05	forward	3.50047e+07	5.39205e+07	3.34945e+07	5.02613e+07	4.23124e+07	3.54203e+07	5.31858e+07	3.37235e+07	6.70021e+07	4.75836e+07	4.99107e+07	4.19563e+07	6.4206e+07	6.26444e+07	3.36951e+07	4.54982e+07	2.60222e+07	5.07508e+07	2.25719e+07	5.29664e+07	6.22897e+07	3.59744e+07	3.36556e+07	5.13194e+07	4.97371e+07	4.10999e+07	6.61436e+07	7.879e+07	7.68641e+07	5.9321e+07	1.84748e+07	2.28135e+07	4.80082e+07	4.81583e+07	4.55425e+07	4.88219e+07	5.34863e+07
Gamma-Linolenic acid	0.998294	B(ii)			200.886	277.218	forward	747814	705229	979750	1.53601e+06	1.97627e+06	1.76125e+06	5.89421e+06	1.40495e+06	888226	1.28805e+06	994704	462019	1.94202e+06	2.21746e+06	2.35344e+06	1.08084e+06	904393	365846	977714	1.0686e+06	1.55921e+06	2.28502e+06	982443	968257	1.20821e+06	1.20823e+06	1.46851e+06	1.00066e+06	1.12981e+06	1.07166e+06	1.23741e+06	1.13291e+06	1.47093e+06	1.4933e+06	1.36183e+06	1.60106e+06	1.46134e+06
2-Piperidinone	0.99826	B(ii)			52.3623	100.076	forward	3.3141e+07	6.99972e+07	2.22795e+06	1.51119e+06	3.96927e+06	3.70842e+06	4.5364e+06	8.97667e+06	1.17424e+07	1.42655e+06	1.6276e+07	5.00208e+06	2.75355e+06	1.7644e+06	3.941e+06	2.38872e+06	2.34578e+06	1.30071e+07	2.67553e+06	2.7666e+06	7.10826e+06	2.25618e+06	2.38005e+06	1.9266e+06	2.80598e+07	2.70635e+06	1.06595e+07	1.64709e+07	1.88488e+06	1.0718e+07	3.89788e+06	1.43394e+06	9.04641e+06	9.29537e+06	9.34845e+06	9.36341e+06	9.70649e+06
9,10-DHOME	0.997979	B(ii)			105.162	313.239	forward	543425	2.01021e+06	545997	706465	432270	2.45773e+06	676142	554068	1.98585e+06	279087	577706	586643	1.74141e+06	696089	2.91994e+06	447132	2.64211e+06	629475	3.22291e+06	878413	900237	1.02276e+06	2.79583e+06	429553	2.09714e+07	601190	2.56597e+06	604836	1.77421e+06	3.65758e+06	853705	530791	1.65496e+06	1.76068e+06	1.56082e+06	1.77774e+06	1.72732e+06
5-[2H-Pyrrol-4-(3H)-ylidenemethyl]-2-furanmethanol	0.997745	B(ii)			296.051	178.086	forward	9.97612e+06	1.43906e+07	1.17562e+07	1.59855e+07	1.16857e+07	8.08388e+06	1.54266e+07	9.33044e+06	1.77202e+07	1.99581e+07	1.09575e+07	1.82864e+07	1.13459e+07	1.74902e+07	2.6648e+07	1.15321e+07	8.74025e+06	9.10399e+06	1.35621e+07	1.11203e+07	1.61732e+07	1.08981e+07	1.1534e+07	1.13638e+07	9.44548e+06	1.15639e+07	1.27762e+07	1.31203e+07	1.35698e+07	1.36477e+07	7.90356e+06	1.19515e+07	1.34966e+07	1.40927e+07	1.29679e+07	1.40399e+07	1.40878e+07
L-Phenylalanine	0.997715	B(ii)			279.002	166.086	forward	6.26143e+07	7.21115e+07	6.57034e+07	7.54082e+07	1.54904e+08	1.4521e+08	1.63599e+08	9.44628e+07	5.5621e+07	6.02858e+07	7.70694e+07	8.97894e+07	8.08063e+07	1.00906e+08	1.0153e+08	8.04829e+07	4.1313e+07	1.1183e+08	5.42045e+07	6.03191e+07	8.56275e+07	7.3774e+07	7.18128e+07	7.08735e+07	6.78371e+07	9.93532e+07	9.1795e+07	8.48638e+07	8.44845e+07	8.27454e+07	1.10971e+08	1.13854e+08	8.45558e+07	9.51259e+07	9.1586e+07	9.4518e+07	9.82182e+07
4-Methylpyrrolo[1,2-a]pyrazine	0.997557	B(ii)			46.5919	133.076	forward	1.08898e+07	1.28084e+07	1.29577e+07	1.2585e+07	1.31061e+07	1.29449e+07	1.24882e+07	1.29619e+07	1.25008e+07	1.30361e+07	1.2818e+07	1.22652e+07	1.28873e+07	1.27694e+07	1.31193e+07	1.27737e+07	1.23724e+07	1.34327e+07	1.29019e+07	1.33658e+07	1.36417e+07	1.28313e+07	1.25337e+07	1.30787e+07	1.13763e+07	1.3354e+07	1.30857e+07	1.29906e+07	1.29142e+07	1.2897e+07	1.26666e+07	1.27408e+07	1.17469e+07	1.20106e+07	1.25929e+07	1.26116e+07	1.24916e+07
L-Glutamic acid	0.997539	B(ii)			402.81	146.045	forward	8.16108e+07	1.80796e+08	1.20182e+08	1.71112e+08	1.11123e+08	1.28128e+08	1.30631e+08	7.45486e+07	2.21002e+08	1.12136e+08	1.14154e+08	1.17855e+08	1.50356e+08	1.92461e+08	1.79989e+08	8.90591e+07	4.71043e+07	6.93024e+07	8.33981e+07	1.47144e+08	2.38251e+08	1.09476e+08	1.30381e+08	1.8975e+08	8.36054e+07	9.40893e+07	1.81411e+08	1.75686e+08	1.53701e+08	1.32865e+08	5.63421e+07	7.72778e+07	1.33177e+08	1.37687e+08	1.32649e+08	1.38463e+08	1.34744e+08
Pelargonic acid	0.997483	B(ii)			40.797	157.122	forward	2.36402e+08	2.93448e+08	2.83569e+08	2.26424e+08	2.30561e+08	2.18457e+08	2.375e+08	2.54908e+08	1.86186e+08	3.21462e+08	2.37232e+08	2.79849e+08	2.3435e+08	2.34215e+08	2.36332e+08	3.14184e+08	2.26744e+08	2.79921e+08	2.90651e+08	1.952e+08	3.31477e+08	3.11777e+08	2.84809e+08	2.55109e+08	1.60479e+08	2.45164e+08	2.82778e+08	2.42367e+08	3.09942e+08	2.4521e+08	3.35225e+08	2.34295e+08	1.46814e+08	1.51641e+08	1.57312e+08	1.50687e+08	1.60927e+08
Beta-Guanidinopropionic acid	0.997463	B(ii)			369.853	130.061	forward	1.28185e+09	1.22489e+09	1.273e+09	1.22394e+09	1.23194e+09	1.28751e+09	1.17235e+09	1.27365e+09	1.03768e+09	1.17476e+09	1.19559e+09	1.29336e+09	1.19678e+09	1.17621e+09	1.28257e+09	1.22932e+09	1.18946e+09	1.33687e+09	1.17846e+09	1.21214e+09	1.08266e+09	1.17792e+09	1.20126e+09	1.12397e+09	9.06437e+08	1.20351e+09	1.14546e+09	1.1261e+09	1.23767e+09	1.12906e+09	1.17686e+09	1.33581e+09	1.25261e+09	1.26596e+09	1.28102e+09	1.25404e+09	1254411216
D-Glucose	0.997389	B(ii)			224.818	179.055	forward	1.27894e+08	1.19605e+08	1.66263e+08	1.30744e+08	1.25143e+08	1.55621e+08	1.15161e+08	1.02537e+08	9.03712e+07	1.29459e+08	1.29779e+08	1.34097e+08	1.05889e+08	1.42686e+08	1.19493e+08	1.30275e+08	1.40287e+08	1.21296e+08	1.34741e+08	1.27371e+08	1.17613e+08	1.45757e+08	1.22508e+08	1.47602e+08	9.58505e+07	1.25747e+08	1.08075e+08	1.30248e+08	1.18568e+08	1.22663e+08	1.40294e+08	1.12872e+08	1.35816e+08	1.23506e+08	1.38766e+08	1.37763e+08	1.49556e+08
L-Carnitine	0.997272	B(ii)			458.377	162.113	forward	4.92444e+07	2.70074e+07	6.69893e+06	2.528e+07	2.23363e+07	2.40529e+07	2.96842e+07	2.52844e+07	3.763e+07	3.55559e+07	4.86333e+07	3.31739e+07	2.31592e+07	2.26738e+07	3.87529e+07	1.27121e+07	2.96418e+07	3.95671e+07	3.49586e+07	2.96441e+07	3.16597e+07	2.91264e+07	2.62811e+07	2.53862e+07	1.45804e+07	2.58304e+07	2.82793e+07	1.89381e+07	2.26403e+07	2.40654e+07	2.80757e+07	4.40197e+07	3.03707e+07	2.68746e+07	2.3828e+07	1.62881e+07	4.52766e+07
2-Hydroxystearic acid	0.996472	B(ii)			50.2869	299.259	forward	3.48371e+06	2.43109e+07	4.06669e+06	4.90632e+06	9.65624e+06	3.65727e+07	1.44892e+07	9.65396e+06	3.41747e+07	2.49804e+06	3.30944e+06	8.15194e+06	1.40857e+07	1.0839e+07	1.01619e+07	7.4856e+06	2.64442e+07	3.34169e+06	2.18357e+07	1.11656e+07	9.85997e+06	1.64949e+07	1.35196e+07	5.19572e+06	1.94731e+08	3.40135e+06	3.32916e+07	3.02079e+06	2.13369e+07	4.99666e+07	1.19581e+07	1.32752e+07	2.1385e+07	2.15154e+07	2.16601e+07	2.17612e+07	2.1959e+07
N6-Methyladenosine	0.996419	B(ii)			316.611	282.12	forward	6.55766e+06	7.52344e+06	7.33696e+06	1.11703e+07	1.12003e+07	1.08722e+07	9.77113e+06	8.35139e+06	7.67441e+06	7.0521e+06	7.63866e+06	8.80287e+06	4.79556e+06	6.97487e+06	8.72049e+06	7.33808e+06	6.20114e+06	7.69182e+06	5.35664e+06	7.76957e+06	7.91336e+06	8.75229e+06	7.81073e+06	4.86555e+06	5.08483e+06	5.72472e+06	9.27151e+06	1.00201e+07	6.66533e+06	1.09053e+07	8.30345e+06	7.48887e+06	7.89549e+06	7.74627e+06	8.1291e+06	8.49759e+06	8.74529e+06
16-Hydroxy hexadecanoic acid	0.996182	B(ii)			52.7532	271.228	forward	1.13781e+07	1.58727e+07	7.13361e+06	9.55867e+06	1.15832e+07	3.08036e+07	1.26768e+07	1.43004e+07	3.14967e+07	6.38432e+06	7.70342e+06	1.27732e+07	1.16465e+07	1.4471e+07	1.27277e+07	8.73903e+06	1.57615e+07	6.63519e+06	2.25682e+07	1.02799e+07	8.34658e+06	1.87605e+07	1.98301e+07	8.50627e+06	9.45914e+07	9.4768e+06	2.70276e+07	8.81973e+06	1.61151e+07	3.11994e+07	1.1594e+07	1.78856e+07	1.91039e+07	1.87143e+07	1.89573e+07	1.91301e+07	2.0156e+07
1-Methylnicotinamide	0.996022	B(ii)			364.776	137.071	forward	1.40107e+07	1.70363e+07	1.23254e+07	2.22666e+07	4.50064e+07	6.88483e+06	4.29854e+07	2.61859e+07	5.74727e+07	2.18713e+07	1.44158e+07	7.39271e+06	1.37836e+07	5.81363e+07	1.23552e+07	6.85099e+06	1.32238e+07	1.48835e+07	4.25702e+07	1.13254e+07	3.34748e+07	4.13029e+07	1.89852e+07	5.44004e+06	3.48495e+07	3.54941e+07	2.29697e+07	1.04379e+07	1.52168e+07	2.76707e+07	4.73365e+07	1.01361e+07	2.74925e+07	2.62493e+07	2.57367e+07	2.59376e+07	2.57398e+07
L-Acetylcarnitine	0.995943	B(ii)			397.616	204.123	forward	6.42904e+06	7.76678e+06	7.77441e+06	7.97444e+06	8.03087e+06	4.87507e+06	8.96962e+06	4.88227e+06	8.11186e+06	9.88503e+06	7.69975e+06	1.05464e+07	6.75753e+06	6.69858e+06	5.15459e+06	7.56889e+06	5.23003e+06	8.36188e+06	7.55334e+06	9.9642e+06	9.24714e+06	7.12133e+06	6.56182e+06	7.53573e+06	8.78992e+06	8.9206e+06	1.03015e+07	1.04729e+07	9.91188e+06	1.09094e+07	6.30547e+06	6.51986e+06	7.8133e+06	8.37597e+06	8.13153e+06	7.53362e+06	1.02867e+07
4-Acetylimidazo[4,5-c]pyridine	0.995618	B(ii)			69.5546	162.055	forward	569772	401694	707606	627895	668472	1.75851e+06	723958	762735	1.54445e+06	884681	527812	703055	840421	892077	539314	498246	2.94442e+06	1.14007e+06	1.12042e+06	483873	1.00061e+06	659573	690190	572536	2.42837e+06	711232	1.37986e+06	756169	996211	1.37119e+06	785493	461814	632891	715218	610492	625236	702634
Succinic acid	0.99532	B(ii)			383.147	117.018	forward	7.83525e+08	9.42683e+08	1.03274e+09	1.21124e+09	6.2682e+08	7.45413e+08	1.22601e+09	5.76916e+08	1.06346e+09	8.44826e+08	1.15292e+09	8.97171e+08	6.52601e+08	1.01095e+09	6.50102e+08	5.62643e+08	5.34885e+08	8.47352e+08	6.22293e+08	8.16192e+08	1.02482e+09	6.54826e+08	1.03262e+09	9.97158e+08	4.98524e+08	8.35655e+08	7.22061e+08	1.13467e+09	1.11951e+09	7.45381e+08	4.57865e+08	6.9193e+08	8.39092e+08	8.64984e+08	8.61495e+08	8.79028e+08	8.9588e+08
Prolyl-Alanine	0.995277	B(ii)			352.011	187.108	forward	6.03719e+06	6.62262e+06	7.7018e+06	8.41115e+06	8.04771e+06	7.93122e+06	8.28675e+06	7.08599e+06	6.42521e+06	6.93047e+06	7.00755e+06	6.25829e+06	8.3404e+06	9.3978e+06	6.33303e+06	7.46642e+06	4.56659e+06	5.46903e+06	6.81321e+06	5.95614e+06	7.71152e+06	6.93106e+06	8.08193e+06	5.62819e+06	8.78118e+06	7.18147e+06	7.31038e+06	7.37316e+06	5.809e+06	8.63647e+06	5.48386e+06	6.61099e+06	5.26889e+06	7.74144e+06	7.15435e+06	7.94125e+06	7.84497e+06
Piperidine	0.995202	B(ii)			284.659	86.0969	forward	1.87636e+07	2.80792e+07	1.9389e+07	2.33706e+07	3.10901e+07	4.19706e+07	4.91797e+07	2.60613e+07	1.91613e+07	2.13277e+07	1.83534e+07	2.36885e+07	2.41554e+07	3.3135e+07	2.59231e+07	2.15668e+07	1.62898e+07	2.00575e+07	1.58264e+07	2.12527e+07	2.69885e+07	1.97411e+07	2.23641e+07	2.11514e+07	2.46677e+07	3.02601e+07	2.24287e+07	2.73608e+07	2.59071e+07	3.23917e+07	3.13535e+07	3.49362e+07	2.49334e+07	2.82621e+07	2.82914e+07	2.81354e+07	2.91956e+07
4-(3,4-Dihydroxyphenyl)-2-hydroxy-1H-phenalen-1-one	0.99501	B(ii)			322.178	305.084	forward	182037	2.30948e+06	2.1994e+06	1.44768e+07	273622	3.88943e+06	201247	2.44379e+06	2.6662e+06	3.39501e+06	3.24492e+06	2.25533e+06	5.99715e+06	2.11724e+06	3.15632e+06	4.92635e+06	1.8644e+06	2.13998e+06	5.12023e+06	2.21897e+06	2.47574e+06	4.00621e+06	3.9065e+06	328225	7.87543e+06	196978	3.33164e+06	5.1216e+06	197637	5.22898e+06	942020	3.29655e+06	3.07649e+06	380269	3.80811e+06	3.94582e+06	4.07096e+06
Malonic acid	0.994711	B(ii)			380.695	103.003	forward	4.24495e+07	8.60844e+07	7.62312e+07	9.91042e+07	9.18606e+07	7.93795e+07	1.3754e+08	6.29768e+07	7.00836e+07	6.35034e+07	8.08301e+07	3.69368e+07	9.48931e+07	8.86992e+07	6.54572e+07	5.78965e+07	5.81563e+07	6.1452e+07	5.31485e+07	7.96161e+07	9.79096e+07	7.08977e+07	7.70615e+07	7.58173e+07	7.40228e+07	7.57573e+07	3.75798e+07	1.08621e+08	1.0161e+08	4.61586e+07	5.65609e+07	6.94938e+07	7.80048e+07	7.92139e+07	7.80588e+07	7.83825e+07	8.06224e+07
Zymonic acid	0.994485	B(ii)			317.623	159.028	forward	2.38049e+07	2.96688e+07	2.60787e+07	3.03102e+07	3.27643e+07	3.74529e+07	2.66491e+07	1.92545e+07	2.3159e+07	4.41479e+07	4.72568e+07	3.76351e+07	3.27941e+07	3.66903e+07	2.23032e+07	1.35712e+07	5.82994e+07	3.73256e+07	5.06466e+07	2.69804e+07	3.91317e+07	5.27556e+07	3.97174e+07	5.51484e+07	7.60219e+07	5.11136e+07	2.37322e+07	4.70227e+07	4.48645e+07	2.60039e+07	6.14481e+07	4.07622e+07	3.38934e+07	3.33666e+07	3.92397e+07	3.80161e+07	3.84313e+07
Phosphorylcholine	0.994437	B(ii)			169.724	184.073	forward	4.32316e+07	3.90628e+07	4.14021e+07	4.63843e+07	3.51239e+07	3.52305e+07	4.27807e+07	3.75378e+07	3.47589e+07	4.03429e+07	3.61892e+07	3.95167e+07	3.72718e+07	3.95432e+07	3.7233e+07	3.67707e+07	3.53676e+07	3.76281e+07	3.66181e+07	3.60372e+07	4.06513e+07	3.93215e+07	3.60659e+07	3.78477e+07	3.59899e+07	3.78578e+07	3.83544e+07	3.87337e+07	4.50717e+07	3.90654e+07	3.899e+07	4.59409e+07	3.53707e+07	4.72822e+07	3.99897e+07	4.10825e+07	3.81897e+07
9,10-Epoxyoctadecenoic acid	0.994365	B(ii)			50.3587	295.228	forward	3.67317e+06	3.30175e+07	4.31988e+06	6.34851e+06	5.41326e+06	4.80183e+07	1.0598e+07	1.25521e+07	3.03208e+07	2.96088e+06	3.44755e+06	7.3933e+06	1.22351e+07	8.63771e+06	9.68845e+06	4.39459e+06	2.42371e+07	4.76821e+06	2.11515e+07	8.85596e+06	5.24108e+06	2.19314e+07	1.13095e+07	3.97462e+06	1.77723e+08	4.28454e+06	2.66449e+07	3.07119e+06	1.82538e+07	4.79866e+07	1.04754e+07	4.97905e+06	1.81953e+07	1.73067e+07	1.85531e+07	2.00656e+07	1.88494e+07
2,6-diaminohexanoic acid	0.994298	B(ii)			562.31	147.113	forward	7.49668e+07	4.20884e+07	5.73016e+07	8.07425e+07	2.81985e+07	3.39689e+07	2.88677e+07	7.65023e+07	1.52111e+08	5.18763e+07	7.46912e+07	1.78249e+08	7.53652e+07	1.84233e+08	2.08223e+07	2.95541e+07	2.81752e+07	3.50856e+07	2.15553e+07	6.50968e+07	5.15981e+07	5.24887e+07	6.98347e+07	1.57157e+07	2.24414e+07	1.0718e+08	4.75296e+07	8.62157e+07	8.36142e+07	3.54389e+07	5.99138e+07	3.47033e+07	7.0186e+07	6.34281e+07	6.52915e+07	6.64968e+07	6.79794e+07
m-Aminobenzoic acid	0.99424	B(ii)			306.337	138.055	forward	7.30235e+08	1.0401e+09	7.95251e+08	7.56822e+08	7.43879e+08	7.65956e+08	7.38254e+08	8.28227e+08	9.41812e+08	6.50351e+08	5.80894e+08	8.49509e+08	6.55785e+08	5.58089e+08	8.34467e+08	5.64942e+08	5.32704e+08	8.47455e+08	6.18638e+08	8.64402e+08	1.00381e+09	5.81529e+08	6.64026e+08	5.52979e+08	6.50151e+08	8.01727e+08	9.75065e+08	8.77911e+08	6.43915e+08	6.93504e+08	6.43766e+08	8.23962e+08	7.16361e+08	8.13974e+08	7.75217e+08	8.13579e+08	7.99035e+08
2-Methylguanosine	0.993989	B(ii)			211.685	298.115	forward	1.85221e+06	2.03162e+06	1.77971e+06	2.05886e+06	2.50234e+06	2.21907e+06	1.67204e+06	2.42315e+06	1.88866e+06	1.6144e+06	1.64942e+06	2.14066e+06	1.9472e+06	2.18788e+06	2.44626e+06	2.21477e+06	1.43542e+06	1.82989e+06	1.44154e+06	1.80256e+06	2.38574e+06	2.0399e+06	1.97729e+06	1.54373e+06	1.42801e+06	1.50818e+06	2.12626e+06	2.1451e+06	1.89419e+06	1.87336e+06	1.73261e+06	2.39368e+06	1.94809e+06	2.00492e+06	1.90092e+06	2.17093e+06	2.0274e+06
Octadecanamide	0.993945	B(ii)			31.7046	284.295	forward	2.41309e+06	2.68412e+06	3.05531e+06	3.02988e+06	3.32028e+06	2.64255e+06	3.24682e+06	2.66933e+06	2.92569e+06	2.34865e+06	2.30553e+06	2.85506e+06	2.76306e+06	1.78694e+06	1.56579e+06	2.28226e+06	2.955e+06	1.71292e+06	1.80748e+06	2.93647e+06	1.92476e+06	2.02219e+06	3.04709e+06	2.27324e+06	2.9828e+06	1.93047e+06	1.79327e+06	2.70843e+06	1.84225e+06	2.22262e+06	2.73813e+06	2.72661e+06	2.0032e+06	1.97499e+06	2.0661e+06	2.16123e+06	2.04072e+06
Saccharin	0.993936	B(ii)			29.1932	181.991	forward	1.03089e+06	4.77337e+06	1.69936e+06	827077	986693	1.42328e+07	1.19253e+06	1.93091e+06	2.66679e+06	695265	969253	3.0341e+06	1.22462e+06	1.92672e+06	2.03644e+06	2.00382e+06	2.22978e+06	827549	2.14821e+06	954886	1.99244e+06	1.69838e+06	2.86148e+06	806021	3.06723e+07	909235	2.86226e+06	563543	2.34795e+06	9.03731e+06	2.79976e+06	645999	3.30699e+06	3.73383e+06	4.62024e+06	3.72562e+06	3.62253e+06
Pyroglutamic acid	0.993795	B(ii)			305.808	128.034	forward	5.42102e+07	1.37502e+08	5.44204e+07	6.87569e+07	5.70908e+07	1.33688e+08	7.57609e+07	6.0869e+07	1.23007e+08	6.14573e+07	6.27079e+07	7.6339e+07	8.50999e+07	8.77029e+07	1.09525e+08	7.48248e+07	7.45486e+07	6.96112e+07	9.29354e+07	8.17487e+07	7.88508e+07	9.82966e+07	1.11304e+08	5.60389e+07	1.71675e+08	6.04506e+07	1.42908e+08	7.3714e+07	1.2407e+08	1.28077e+08	6.21454e+07	4.86306e+07	9.30416e+07	9.37675e+07	9.11754e+07	9.47634e+07	9.47394e+07
5'-Methylthioadenosine	0.993613	B(ii)			87.9878	298.097	forward	3.14253e+07	1.8507e+07	2.86435e+07	4.48352e+07	3.83242e+07	2.54275e+07	2.5948e+07	4.47856e+07	3.79228e+07	1.71257e+07	3.81348e+07	3.14126e+07	3.82088e+07	2.44828e+07	2.09007e+07	4.1831e+07	3.17692e+07	5.66799e+07	3.76179e+07	2.82559e+07	4.55601e+07	2.49528e+07	3.07083e+07	3.94e+07	2.51203e+07	3.34511e+07	4.03218e+07	4.59896e+07	4.34012e+07	3.13105e+07	2.05417e+07	2.88823e+07	2.3185e+07	2.17535e+07	2.33656e+07	2.19645e+07	2.58234e+07
Propionylcarnitine	0.993185	B(ii)			302.905	218.139	forward	2.69802e+08	5.932e+08	4.9344e+08	5.12519e+08	3.5958e+08	6.99466e+08	6.74264e+08	2.97887e+08	5.34275e+08	6.47791e+08	4.60358e+08	3.2407e+08	4.01043e+08	3.75092e+08	4.32067e+08	2.96123e+08	6.21232e+08	3.45606e+08	6.00483e+08	3.83196e+08	4.16885e+08	5.72333e+08	5.55425e+08	3.89195e+08	7.68433e+08	5.79527e+08	5.92443e+08	4.31998e+08	5.82232e+08	7.3725e+08	5.76025e+08	4.49708e+08	5.25594e+08	5.45508e+08	5.30294e+08	5.40587e+08	5.44804e+08
Adenosine	0.992926	B(ii)			182.26	268.104	forward	1.4676e+06	1.78446e+06	1.3529e+06	3.45917e+06	4.33367e+06	1.68053e+06	4.26783e+06	960440	2.54223e+06	1.78448e+06	1.34202e+06	867929	2.75076e+06	1.01343e+06	1.39719e+06	1.55496e+06	1.53607e+06	1.67884e+06	836878	1.89034e+06	1.28591e+06	1.44133e+06	2.57885e+06	2.8638e+06	1.242e+07	1.37902e+06	2.65089e+06	1.45322e+06	2.49072e+06	2.81084e+06	1.11468e+06	2.11938e+06	3.03485e+06	3.56227e+06	3.21786e+06	2.98318e+06	3.70449e+06
Coniferin	0.9928	B(ii)			36.2346	365.121	forward	381536	3.05506e+06	1.92864e+06	482605	631100	1.0813e+07	391115	547064	321781	16419.6	374824	283948	967992	73618.9	328322	214684	1.28684e+07	78734.6	772328	2.85173e+06	156630	2.14848e+06	4.44853e+06	0	8.38975e+06	58563	3.85829e+06	18903.8	1.46113e+07	9.52338e+06	1.11342e+07	29970.4	2.46385e+06	2.37123e+06	2.82019e+06	2.52638e+06	2.42795e+06
Citrulline	0.992762	B(ii)			432.885	174.088	forward	1.55251e+06	1.60777e+06	746291	2.42751e+06	1.53078e+06	1.07388e+06	2.0342e+06	1.67076e+06	2.50122e+06	1.6055e+06	1.45467e+06	1.92922e+06	1.41798e+06	2.09393e+06	1.67868e+06	2.12914e+06	1.20318e+06	618479	1.22815e+06	1.71337e+06	2.63806e+06	1.32806e+06	1.77195e+06	1.66809e+06	1.20993e+06	1.66509e+06	1.40317e+06	1.36446e+06	3.09503e+06	1.84089e+06	1.35478e+06	992725	1.16753e+06	236588	1.91373e+06	1.70423e+06	1.85874e+06
2-Pyridylacetic acid	0.992672	B(ii)			317.668	138.055	forward	5.49001e+07	7.60218e+07	6.30944e+07	5.7389e+07	7.84067e+07	7.33341e+07	5.96319e+07	6.91357e+07	5.52542e+07	7.44508e+07	5.77619e+07	7.83697e+07	3.45999e+07	3.44345e+07	5.2435e+07	5.82892e+07	4.95461e+07	9.63664e+07	5.2286e+07	8.56703e+07	4.99575e+07	5.65658e+07	5.84693e+07	3.08055e+07	3.29111e+07	6.61927e+07	7.72269e+07	7.0797e+07	6.31059e+07	7.1777e+07	7.90815e+07	6.8047e+07	6.15491e+07	5.93517e+07	6.49464e+07	6.93576e+07	6.8667e+07
Diethanolamine	0.992525	B(ii)			352.005	106.087	forward	5.21995e+06	8.42954e+06	6.81238e+06	5.35813e+06	5.93855e+06	1.06202e+07	5.66421e+06	7.20442e+06	8.25701e+06	8.34048e+06	3.93247e+06	9.23593e+06	6.1275e+06	6.35352e+06	5.95824e+06	5.92239e+06	8.19378e+06	6.36688e+06	1.78578e+07	4.33522e+06	5.63333e+06	5.54063e+06	8.35134e+06	5.62072e+06	1.63364e+07	6.7774e+06	7.60479e+06	5.01293e+06	6.10731e+06	8.62528e+06	6.92823e+06	4.56552e+06	1.44636e+07	1.70728e+07	1.7729e+07	1.76443e+07	1.83536e+07
Creatine	0.992308	B(ii)			370.401	132.077	forward	1.81919e+10	1.78008e+10	1.82618e+10	1.77692e+10	1.80773e+10	1.83254e+10	1.73642e+10	1.85295e+10	1.6568e+10	1.6664e+10	1.68099e+10	1.77237e+10	1.72528e+10	1.78399e+10	1.77945e+10	18347434368	1.70257e+10	1.78881e+10	1.70246e+10	1.74675e+10	1.68391e+10	1.73742e+10	1.74637e+10	1.72919e+10	1.55401e+10	1.75343e+10	1.64817e+10	1.72322e+10	1.76321e+10	1.6537e+10	1.74914e+10	1.78466e+10	1.77061e+10	1.76261e+10	1.74204e+10	1.78875e+10	1.80172e+10
Ethyl dodecanoate	0.991724	B(ii)			36.2396	227.202	forward	4.5981e+07	7.78909e+07	5.72021e+07	6.35176e+07	5.41067e+07	6.42226e+07	7.46007e+07	5.94717e+07	1.03031e+08	4.65669e+07	4.02567e+07	5.75877e+07	7.27014e+07	6.41173e+07	6.64893e+07	7.32597e+07	7.06748e+07	5.02854e+07	7.69142e+07	6.31005e+07	3.79801e+07	5.50687e+07	7.18153e+07	5.70463e+07	1.34061e+08	5.92464e+07	8.51392e+07	7.51066e+07	6.23701e+07	7.82647e+07	6.83103e+07	5.38162e+07	6.58438e+07	7.50062e+07	6.71237e+07	7.24448e+07	7.67015e+07
L-Gulose	0.991364	B(ii)			319.943	203.053	forward	9.16799e+07	6.26738e+07	7.20845e+07	6.69274e+07	6.35346e+07	7.27988e+07	3.17242e+07	5.67397e+07	5.36479e+07	4.59067e+07	4.92638e+07	8.37812e+07	7.1152e+07	6.63066e+07	5.62125e+07	8.02359e+07	6.91689e+07	7.33836e+07	6.69417e+07	6.64549e+07	5.67899e+07	4.0176e+07	5.86541e+07	6.6944e+07	4.73976e+07	6.10364e+07	5.58405e+07	6.16367e+07	5.39569e+07	6.11376e+07	5.83112e+07	5.63235e+07	5.18739e+07	5.3135e+07	6.81069e+07	6.77108e+07	7.10251e+07
Acrylamide	0.991253	B(ii)			387.403	72.045	forward	1.91432e+06	579723	1.65269e+06	2.29664e+06	1.1213e+06	974858	647736	1.87041e+06	1.14965e+06	952348	2.21369e+06	1.90571e+06	1.65867e+06	1.43705e+06	627619	1.81274e+06	1.16932e+06	1.3927e+06	976972	1.13381e+06	755986	1.19788e+06	762906	1.02386e+06	734110	1.26808e+06	743335	967920	350352	437203	1.38405e+06	976185	812686	1.07351e+06	1.34423e+06	1.39706e+06	1.63467e+06
Dihydroxyacetone phosphate	0.991059	B(ii)			506.112	168.99	forward	8.2692e+07	3.3079e+07	7.28467e+07	5.96194e+07	3.26716e+07	3.03212e+07	3.45856e+07	7.48653e+07	6.63563e+07	7.07141e+07	7.98473e+07	7.08286e+07	4.07963e+07	7.61381e+07	3.27972e+07	1.78453e+08	4.93639e+07	3.36211e+07	1.51275e+08	6.84621e+07	3.85912e+07	7.16317e+07	3.93884e+07	1.309e+08	1.0378e+08	6.4742e+07	1.11811e+08	2.66881e+07	2.6267e+07	2.73827e+07	3.37856e+07	4.77496e+07	3.28908e+07	1.58036e+08	6.68856e+07	6.63661e+07	3.28378e+07
Taurine	0.991014	B(ii)			313.182	126.022	forward	7.93579e+08	8.68659e+08	9.18123e+08	8.64973e+08	9.92327e+08	6.43917e+08	2.33723e+09	7.56322e+08	1.23359e+09	1.41236e+09	8.41048e+08	2.21063e+08	9.60818e+08	1.07507e+09	7.59716e+08	9.61495e+08	7.35806e+08	4.97429e+08	8.43553e+08	8.47646e+08	1.20086e+09	1.27834e+09	1.08302e+09	1.04224e+09	9.01642e+08	1.20276e+09	1.12061e+09	1.08518e+09	1.39941e+09	8.095e+08	6.8943e+08	7.6784e+08	1.05541e+09	1.05092e+09	1.03487e+09	1.04723e+09	1.05382e+09
Arabinosylhypoxanthine	0.990908	B(ii)			231.582	269.088	forward	9.89373e+07	8.74778e+07	1.69989e+08	1.71509e+08	9.78014e+07	6.74871e+07	1.76072e+08	4.78575e+07	8.2955e+07	1.5137e+08	1.18226e+08	7.93729e+07	9.18187e+07	9.17566e+07	5.96277e+07	7.26672e+07	1.37857e+08	1.66392e+08	5.78311e+07	8.27548e+07	1.15667e+08	8.4141e+07	9.09723e+07	1.59779e+08	1.79496e+08	1.92287e+08	6.0265e+07	1.71325e+08	1.90282e+08	9.50851e+07	3.77056e+07	5.17906e+07	1.19367e+08	1.20533e+08	1.14626e+08	1.18652e+08	1.19622e+08
1H-Pyrrole-2-carboxaldehyde	0.990626	B(ii)			58.0438	96.0449	forward	1.93856e+06	1.81434e+06	2.75701e+06	1.4616e+06	2.90815e+06	2.04721e+06	2.18982e+06	3.11796e+06	1.73281e+06	2.80903e+06	1.86787e+06	2.13128e+06	2.79064e+06	2.40973e+06	2.67727e+06	2.69877e+06	1.68896e+06	617271	2.40524e+06	1.89744e+06	2.55635e+06	3.70068e+06	2.12089e+06	1.75759e+06	1.99975e+06	1.97532e+06	1.82228e+06	2.85088e+06	2.21744e+06	2.14841e+06	1.90909e+06	1.81219e+06	1.93948e+06	2.03385e+06	1.57388e+06	1.81177e+06	2.17089e+06
L-Histidine	0.990593	B(ii)			324.471	156.077	forward	1.27555e+07	1.82316e+07	1.90138e+07	1.65199e+07	1.64969e+07	1.57303e+07	1.12428e+07	1.68955e+07	1.47177e+07	1.45648e+07	1.47178e+07	1.229e+07	1.46172e+07	1.54979e+07	1.60458e+07	1.44524e+07	1.70745e+07	1.28318e+07	2.0077e+07	1.35613e+07	1.64922e+07	1.555e+07	2.24089e+07	1.66952e+07	1.66894e+07	1.57177e+07	1.57346e+07	1.45927e+07	1.37349e+07	1.51804e+07	1.40393e+07	1.43709e+07	1.38562e+07	1.50905e+07	1.67477e+07	1.47584e+07	1.65275e+07
L-Lysine	0.99019	B(ii)			562.804	145.097	forward	4.168e+07	1.18514e+07	2.64846e+07	3.01351e+07	8.02228e+06	1.21964e+07	8.93793e+06	3.56136e+07	5.62757e+07	2.43003e+07	3.05851e+07	6.55982e+07	2.53396e+07	7.51018e+07	5.70581e+06	9.64983e+06	1.1726e+07	1.40059e+07	5.54521e+06	2.99304e+07	1.47198e+07	2.07335e+07	2.07431e+07	4.60222e+06	6.84874e+06	3.73083e+07	1.35281e+07	2.03593e+07	2.16518e+07	1.05051e+07	1.81871e+07	1.12834e+07	2.23206e+07	2.2999e+07	2.228e+07	2.14819e+07	2.71756e+07
Guanine	0.990137	B(ii)			246.97	152.057	forward	5.92424e+06	6.31494e+06	8.71626e+06	9.07144e+06	1.45268e+07	1.60701e+07	1.53119e+07	7.46822e+06	7.81635e+06	7.70125e+06	8.27105e+06	1.0293e+07	8.75817e+06	8.78747e+06	1.38876e+07	8.85208e+06	6.54793e+06	4.20725e+06	8.88357e+06	1.12307e+07	1.39605e+07	1.23548e+07	8.11636e+06	1.07847e+07	1.13332e+07	6.46938e+06	7.834e+06	7.87801e+06	8.34936e+06	1.2512e+07	9.03296e+06	1.51454e+07	9.86248e+06	1.14811e+07	9.95085e+06	1.01036e+07	1.06268e+07
Ethyl carbamate	0.989699	B(ii)			387.529	90.0555	forward	1.87607e+08	6.38429e+07	1.81355e+08	2.19383e+08	1.02282e+08	1.03887e+08	7.42555e+07	1.82062e+08	1.13049e+08	8.73029e+07	2.35266e+08	1.90631e+08	1.83769e+08	1.4629e+08	8.36537e+07	1.96923e+08	1.44268e+08	1.53309e+08	6.98841e+07	1.67347e+08	1.27405e+08	1.32274e+08	9.07431e+07	1.23884e+08	7.89317e+07	1.05526e+08	7.86443e+07	8.32051e+07	3.78777e+07	6.8673e+07	1.17433e+08	1.03218e+08	1.04533e+08	1.10664e+08	1.18114e+08	1.29788e+08	1.53246e+08
Citric acid	0.989372	B(ii)			558.25	191.019	forward	2.11241e+07	3.17614e+07	3.03149e+07	3.74804e+07	3.43254e+07	2.12052e+07	3.77225e+07	3.94306e+07	4.40566e+07	2.44792e+07	3.145e+07	2.61332e+07	2.50475e+07	3.66821e+07	3.06424e+07	2.34428e+07	2.8703e+07	3.81143e+07	4.93226e+07	2.56501e+07	2.54932e+07	3.5446e+07	2.94246e+07	3.56418e+07	6.42041e+07	3.0639e+07	2.79666e+07	3.10372e+07	3.01621e+07	5.71697e+07	2.45216e+07	4.39314e+07	3.48472e+07	3.59209e+07	2.62565e+07	3.75813e+07	2.63521e+07
beta-Alanine	0.98926	B(ii)			388.884	88.0394	forward	1.92307e+08	6.81019e+07	2.11705e+08	1.94291e+08	1.07898e+08	1.2762e+08	9.78386e+07	2.09526e+08	1.00387e+08	1.05929e+08	2.83016e+08	2.24642e+08	1.4321e+08	1.71924e+08	1.04928e+08	2.04231e+08	1.27021e+08	1.67695e+08	7.57356e+07	1.52991e+08	9.10497e+07	1.58652e+08	1.12571e+08	9.76341e+07	5.33928e+07	1.27348e+08	8.74005e+07	8.48016e+07	5.53669e+07	8.52465e+07	1.37595e+08	1.28148e+08	1.33232e+08	1.41608e+08	1.45103e+08	1.52083e+08	1.53818e+08
Cyclohexanecarboxylic acid	0.989209	B(ii)			336.2	127.076	forward	2.4568e+07	2.93391e+07	3.19656e+07	3.22289e+07	2.3176e+07	2.70627e+07	2.84744e+07	2.31548e+07	2.47307e+07	2.97873e+07	2.98938e+07	3.08591e+07	2.09805e+07	2.70964e+07	2.47358e+07	3.7083e+07	2.42662e+07	2.94803e+07	2.48076e+07	2.98606e+07	2.44896e+07	2.68339e+07	3.02265e+07	2.05381e+07	2.61891e+07	2.45617e+07	2.45436e+07	2.80863e+07	2.49309e+07	2.90741e+07	2.48602e+07	2.41027e+07	1.95451e+07	1.96148e+07	1.70413e+07	1.74742e+07	1.68307e+07
Adenosine 2'-phosphate	0.989091	B(ii)			441.994	348.071	forward	1.29348e+06	1.05596e+06	2.49129e+06	6.19764e+06	3.70032e+06	2.89498e+06	2.66097e+06	956260	1.37501e+06	1.38653e+06	1.3647e+06	6.20707e+06	3.27255e+06	3.24193e+06	1.19184e+06	2.3893e+06	675161	1.15062e+06	938979	883767	1.39672e+06	911695	994590	4.08375e+06	1.66667e+06	1.45045e+06	766670	1.30654e+06	1.23223e+06	1.82839e+06	962894	1.22908e+06	1.97178e+06	2.07234e+06	2.30678e+06	1.84148e+06	1.79353e+06
Glucose 6-phosphate	0.988978	B(ii)			570.897	259.023	forward	4.9632e+07	2.28679e+07	4.55007e+07	4.02438e+07	2.26724e+07	1.68206e+07	1.84163e+07	4.84132e+07	3.85593e+07	1.06579e+07	3.89246e+07	2.21407e+07	5.41014e+07	5.44833e+07	2.66164e+07	3.57344e+07	2.71129e+07	2.67658e+07	2.1412e+07	1.83158e+07	3.14038e+07	1.29939e+07	3.50865e+07	1.10421e+07	2.59167e+07	1.90709e+07	4.93944e+07	1.4583e+07	1.59699e+07	2.23746e+07	2.697e+07	3.08682e+07	1.81098e+07	2.29363e+07	3.12843e+07	2.06441e+07	2.28048e+07
Thymidine	0.988744	B(ii)			87.0424	241.083	forward	3.47737e+07	5.3391e+07	2.8639e+07	2.83236e+07	2.18052e+07	4.7163e+07	3.67411e+07	4.74262e+07	3.44041e+07	4.52529e+07	3.65654e+07	5.63151e+07	2.46483e+07	2.66408e+07	6.45705e+07	2.31846e+07	6.62144e+07	3.47133e+07	4.01359e+07	5.66772e+07	2.83667e+07	4.74361e+07	2.46453e+07	3.63718e+07	3.1413e+07	2.90282e+07	1.99246e+07	2.32975e+07	4.50041e+07	2.31424e+07	2.86382e+07	6.994e+07	3.71394e+07	3.55885e+07	3.62029e+07	3.53922e+07	3.73146e+07
D-Ribose 5-phosphate	0.988372	B(ii)			453.298	229.012	forward	2.12077e+08	2.08425e+08	1.72853e+08	1.45871e+08	2.00133e+08	1.56199e+08	1.1386e+08	2.36436e+08	2.2777e+08	1.31205e+08	1.19769e+08	1.5201e+08	1.4776e+08	1.46093e+08	1.9034e+08	2.13878e+08	1.21014e+08	2.08078e+08	1.03368e+08	1.59488e+08	1.5792e+08	7.7105e+07	1.22642e+08	8.9801e+07	4.86462e+07	1.38087e+08	1.32711e+08	1.04453e+08	1.43148e+08	1.27698e+08	1.38082e+08	1.30699e+08	1.69484e+08	1.45117e+08	1.4445e+08	1.51079e+08	1.51259e+08
Trimethylamine N-oxide	0.988307	B(ii)			347.45	76.0762	forward	7.25063e+07	7.17043e+07	7.06457e+07	6.80047e+07	2.31513e+07	3.39102e+07	2.65894e+07	4.61587e+07	3.42345e+07	2.17613e+07	6.04924e+07	4.84674e+07	2.9067e+07	4.04898e+07	2.12193e+07	7.49613e+07	3.27163e+07	6.38474e+07	3.57133e+07	3.98879e+07	5.27689e+07	3.82325e+07	5.3751e+07	3.40202e+07	5.34072e+07	6.71461e+07	7.71092e+07	6.16339e+07	3.40352e+07	3.91221e+07	2.77682e+07	3.29984e+07	4.57674e+07	4.61815e+07	4.56011e+07	5.00143e+07	4.95428e+07
4-Dodecylbenzenesulfonic Acid	0.987956	B(ii)			25.3706	325.184	forward	1.49612e+09	1.76619e+09	9.23246e+08	1.73519e+09	1.45927e+09	1.36215e+09	1.36112e+09	9.80728e+08	1.11951e+09	2.89765e+08	6.32967e+08	8.03517e+08	6.48421e+08	1.07382e+09	1.39504e+09	1.23423e+09	9.74381e+08	9.5539e+08	7.27833e+08	8.80324e+08	8.9757e+08	4.74925e+08	7.51743e+08	6.88438e+08	3.05909e+09	8.40613e+08	1.07975e+09	7.67867e+08	1.01331e+09	6.94907e+08	8.85136e+08	7.57101e+08	1.92389e+09	1.91099e+09	1.90557e+09	1.91704e+09	1.90876e+09
Heptanoic acid	0.987513	B(ii)			31.0028	129.091	forward	1.41474e+07	4.65822e+07	2.89649e+07	3.37039e+07	9.88847e+06	1.14854e+07	8.81443e+06	1.04824e+07	7.94829e+06	1.37504e+07	1.14105e+07	1.07554e+07	4.16366e+07	1.10941e+07	9.97485e+06	3.37384e+07	9.47454e+06	1.11803e+07	9.93406e+06	1.0187e+07	1.19996e+07	1.33136e+07	1.46541e+07	1.02269e+07	7.0751e+06	1.20391e+07	1.01398e+07	1.32421e+07	1.26177e+07	1.20012e+07	1.17712e+07	6.52742e+07	1.1002e+07	7.13287e+07	1.10926e+07	1.20523e+07	1.14964e+07
N2,N2-Dimethylguanosine	0.987221	B(ii)			207.194	312.13	forward	727475	765471	841541	999467	1.16777e+06	1.00941e+06	703076	717925	748847	579419	675496	947340	748252	709051	732263	790778	705550	604065	551747	770879	888352	891983	737927	700910	420842	488146	651961	659291	730379	581778	601793	893061	737951	812345	743090	827425	785894
N1-(2-Hydroxyethyl)flurazepam	0.986265	B(ii)			279.019	333.079	forward	239115	119485	179852	394290	324492	417059	134656	276584	207872	482033	363711	403192	655610	228827	425217	558008	263448	166290	556100	404008	38684.7	689269	445593	445935	1.26464e+06	225046	521716	454199	161966	691127	232470	586260	341301	347817	332415	305112	411141
Linoleic acid	0.985829	B(ii)			199.792	279.233	forward	9.92234e+06	1.1009e+07	8.01014e+06	3.26302e+06	1.86682e+07	2.04321e+07	2.25122e+07	1.53464e+07	1.36378e+07	1.67706e+07	1.93926e+07	3.09827e+07	2.05722e+07	3.57134e+07	5.35082e+07	2.74996e+07	1.05694e+07	9.6435e+06	1.5592e+07	7.27846e+06	1.11844e+07	1.40879e+07	1.15274e+07	2.3627e+07	1.61652e+07	7.51912e+06	1.96097e+07	1.74941e+07	3.59473e+07	4.0857e+07	2.0061e+07	2.20784e+07	2.0381e+07	1.95703e+07	1.92168e+07	2.07262e+07	2.02687e+07
5-Methyldeoxycytidine	0.985352	B(ii)			212.846	242.114	forward	1.69238e+06	1.76093e+06	1.50819e+06	1.41923e+06	2.13953e+06	1.65162e+06	2.11995e+06	1.68163e+06	1.88164e+06	1.34159e+06	1.43918e+06	1.81269e+06	1.50714e+06	1.60641e+06	2.42549e+06	2.03152e+06	2.16989e+06	1.51339e+06	1.33716e+06	1.76837e+06	1.76867e+06	1.76798e+06	1.69269e+06	1.70924e+06	1.29235e+06	1.42021e+06	1.84438e+06	1.81857e+06	2.26481e+06	1.99787e+06	1.65349e+06	2.25695e+06	1.22452e+06	1.79255e+06	1.84082e+06	1.89031e+06	1.8919e+06
9-Hydroxybenzo[a]pyrene-4,5-oxide	0.98441	B(ii)			438.926	285.094	forward	1.67115e+06	1.69188e+06	2.34308e+06	2.18939e+06	1.93295e+06	1.84988e+06	2.37751e+06	1.59122e+06	1.89115e+06	2.46643e+06	1.49238e+06	2.08653e+06	1.62845e+06	1.96907e+06	1.69033e+06	2.03274e+06	2.37547e+06	1.90208e+06	3.008e+06	2.49559e+06	2.35056e+06	2.4582e+06	2.06727e+06	2.33124e+06	2.06553e+06	2.39438e+06	1.97511e+06	1.93326e+06	2.28671e+06	2.46448e+06	2.50291e+06	1.98026e+06	2.05845e+06	2.26749e+06	2.26545e+06	2.36205e+06	2.28292e+06
3-Hydroxyanthranilic acid	0.984319	B(ii)			193.644	154.05	forward	0	7.42102e+06	457166	1.89588e+06	272391	2.85194e+07	740220	5.92912e+06	1.89e+07	0	0	769105	5.37404e+06	5.09548e+06	9.17596e+06	271516	4.8557e+06	0	1.87258e+07	1.15753e+06	986403	4.92954e+06	5.45509e+06	0	7.00893e+06	0	7.51327e+06	0	8.68157e+06	1.50235e+07	7.55666e+06	0	4.29743e+06	5.15086e+06	5.30447e+06	5.31742e+06	5.32552e+06
L-Methionine	0.984185	B(ii)			305.192	150.058	forward	6.72135e+06	5.63876e+06	1.01122e+07	1.21699e+07	2.24935e+07	1.84742e+07	2.22355e+07	1.51305e+07	5.59877e+06	9.20541e+06	1.30708e+07	1.10787e+07	2.13385e+07	1.67203e+07	2.11651e+07	2.63642e+07	8.47314e+06	2.49561e+07	8.7982e+06	5.69196e+06	1.38462e+07	1.01301e+07	6.68143e+06	1.43981e+07	2.10417e+07	2.47454e+07	1.56003e+07	2.44667e+07	2.82415e+07	3.14511e+07	1.16798e+07	7.3108e+06	1.93923e+07	2.43178e+07	1.64973e+07	2.21871e+07	1.84242e+07
D-Erythrose 4-phosphate	0.984165	B(ii)			456.631	199.001	forward	9.7009e+07	7.57271e+07	6.6866e+07	6.42929e+07	8.99514e+07	8.21621e+07	5.85597e+07	8.80798e+07	8.08963e+07	6.62271e+07	5.36498e+07	7.7055e+07	6.9413e+07	8.25312e+07	8.30497e+07	9.5027e+07	6.46312e+07	9.62702e+07	5.57122e+07	6.03713e+07	6.82865e+07	4.86037e+07	5.38293e+07	5.48021e+07	3.28987e+07	5.0143e+07	6.89492e+07	4.53656e+07	6.1811e+07	7.73041e+07	5.51296e+07	5.80966e+07	6.22313e+07	6.55931e+07	6.86642e+07	8.12995e+07	8.09699e+07
D-Arabinose 5-phosphate	0.983814	B(ii)			453.458	213.016	forward	6.0666e+07	5.81542e+07	6.25395e+07	4.66003e+07	5.47429e+07	4.18352e+07	4.44061e+07	8.72901e+07	7.84232e+07	4.58241e+07	3.76263e+07	4.90466e+07	6.10067e+07	6.80532e+07	6.49905e+07	7.93958e+07	4.59179e+07	6.85059e+07	3.35867e+07	5.79149e+07	5.21384e+07	2.4567e+07	3.7802e+07	3.68068e+07	1.30914e+07	4.56807e+07	5.55412e+07	3.20717e+07	3.99328e+07	3.91574e+07	4.11772e+07	5.60353e+07	5.34019e+07	5.99809e+07	4.88625e+07	5.09926e+07	6.37005e+07
Uracil	0.983748	B(ii)			400.494	111.019	forward	6.11149e+06	5.32736e+06	5.568e+06	5.59727e+06	5.83632e+06	5.66212e+06	6.36053e+06	5.63079e+06	7.4075e+06	6.74555e+06	5.95724e+06	6.63923e+06	5.64511e+06	6.24833e+06	5.81711e+06	5.60189e+06	5.4815e+06	5.30535e+06	5.61505e+06	6.39801e+06	6.78718e+06	6.387e+06	5.74955e+06	7.17556e+06	5.84742e+06	5.64938e+06	6.34059e+06	5.23151e+06	5.36187e+06	6.33122e+06	5.96832e+06	6.6436e+06	6.33896e+06	6.116e+06	6.02855e+06	5.43222e+06	5.73154e+06
Adenosine 3',5'-diphosphate	0.983615	B(ii)			413.404	428.038	forward	494650	487501	743392	635153	762492	563193	761291	572670	693808	721869	654996	593604	880420	589657	549978	779115	594882	597183	721330	567910	551177	585042	845953	539953	311408	720694	741527	668866	688435	473605	479054	531584	568564	654950	676960	653382	512643
Prolyl-Threonine	0.983545	B(ii)			345.083	217.118	forward	1.12389e+06	1.54565e+06	1.57838e+06	1.29855e+06	1.42801e+06	2.69306e+06	1.78703e+06	1.75744e+06	1.41418e+06	1.4405e+06	1.68103e+06	1.38634e+06	2.02832e+06	2.24313e+06	151273	1.60396e+06	1.11589e+06	850247	1.3872e+06	1.32947e+06	1.45e+06	1.52263e+06	2.00706e+06	1.10586e+06	1.78063e+06	1.25769e+06	1.62892e+06	1.04174e+06	604042	1.81243e+06	1.63892e+06	1.71344e+06	1.27433e+06	1.33784e+06	1.36976e+06	1.65528e+06	1.67622e+06
2,6-Dimethylpyrazine	0.983153	B(ii)			425.114	109.076	forward	5.53815e+06	4.85719e+06	5.92826e+06	6.64218e+06	5.72597e+06	4.81473e+06	2.88025e+06	6.16329e+06	4.90867e+06	6.0764e+06	5.99946e+06	4.77314e+06	4.9323e+06	5.3711e+06	5.75521e+06	6.3283e+06	5.25998e+06	5.50537e+06	5.72933e+06	5.42284e+06	4.96478e+06	4.85514e+06	5.49223e+06	5.11705e+06	3.32897e+06	6.07708e+06	5.35028e+06	4.70984e+06	4.54176e+06	5.32664e+06	4.31937e+06	5.0606e+06	4.53181e+06	5.70178e+06	5.56819e+06	5.82846e+06	6.02413e+06
D-Glyceraldehyde 3-phosphate	0.983016	B(ii)			458.261	168.99	forward	2.19159e+08	1.77097e+08	1.46956e+08	1.62692e+08	1.75213e+08	1.94762e+08	1.79019e+08	1.76943e+08	1.84468e+08	1.59833e+08	1.84289e+08	1.63628e+08	1.74599e+08	2.17604e+08	1.93259e+08	2.75238e+08	1.01028e+08	1.48974e+08	1.27987e+08	1.50299e+08	1.35508e+08	1.60562e+08	2.24054e+08	1.03368e+08	6.29033e+07	1.61428e+08	1.3293e+08	1.28082e+08	1.02645e+08	1.27212e+08	1.64026e+08	1.59063e+08	1.87843e+08	1.54214e+08	1.60472e+08	1.62113e+08	1.62705e+08
Ketoleucine	0.982996	B(ii)			39.9259	129.055	forward	2.81047e+08	3.59095e+08	1.76082e+08	2.46374e+08	4.97272e+08	8.36048e+08	6.96094e+08	9.9808e+08	4.13289e+08	2.08498e+08	1.8572e+08	4.60297e+08	4.31816e+08	6.66259e+08	9.9968e+08	2.71329e+08	1.62947e+08	9.83969e+07	2.84516e+08	2.88118e+08	3.51582e+08	2.66265e+08	3.4105e+08	2.46521e+08	1.75606e+08	2.16805e+08	3.66292e+08	2.00141e+08	1.85801e+08	3.77351e+08	4.63769e+08	1.02941e+09	3.94033e+08	4.07104e+08	3.88825e+08	3.89926e+08	4.18918e+08
D-Glutamine	0.982597	B(ii)			396.043	145.061	forward	1.22017e+08	1.5386e+08	9.69585e+07	2.18726e+08	1.1541e+08	9.01362e+07	1.81907e+08	7.45511e+07	1.64376e+08	1.41324e+08	1.89407e+08	1.50944e+08	1.70654e+08	1.78322e+08	6.54736e+07	1.56733e+08	7.01935e+07	1.72808e+08	5.84191e+07	1.71069e+08	1.6964e+08	9.95657e+07	7.95982e+07	1.22699e+08	1.25055e+08	1.39061e+08	1.94297e+08	2.17013e+08	3.56129e+08	2.04624e+08	4.81635e+07	2.43448e+08	1.56839e+08	1.53334e+08	1.57568e+08	1.6135e+08	1.62456e+08
Pyrophosphate	0.982087	B(ii)			517.46	176.935	forward	1.14832e+08	8.28444e+07	4.42901e+07	1.62434e+08	1.19942e+08	4.96268e+07	1.42085e+08	5.09101e+07	5.31878e+07	1.43982e+08	6.50405e+07	1.43446e+08	1.15829e+08	4.30429e+07	2.79784e+07	4.27682e+07	4.6019e+07	5.07661e+07	4.83553e+07	4.59886e+07	4.18108e+07	1.34601e+08	4.78457e+07	5.6957e+07	1.02875e+08	1.2525e+08	7.82969e+07	1.02569e+08	1.2205e+08	1.60564e+08	4.53749e+07	1.27505e+08	3.72611e+07	1.0572e+08	5.24986e+07	6.56406e+07	1.0715e+08
Terephthalic acid	0.981607	B(ii)			355.372	165.019	forward	7.45705e+06	5.99424e+06	7.23408e+06	6.49381e+06	8.69794e+06	1.02726e+07	7.18455e+06	5.93955e+06	7.05606e+06	6.84574e+06	6.7664e+06	6.66298e+06	5.51267e+06	8.39709e+06	7.41289e+06	5.94367e+06	9.10387e+06	6.19869e+06	5.73487e+06	8.14812e+06	7.30575e+06	8.99164e+06	6.96098e+06	6.68398e+06	1.56162e+07	6.91864e+06	5.86824e+06	6.31477e+06	7.51201e+06	7.24778e+06	9.1105e+06	8.93806e+06	7.25199e+06	6.88682e+06	6.66248e+06	5.95202e+06	5.94329e+06
Galactose 1-phosphate	0.981602	B(ii)			462.175	259.023	forward	2.4738e+08	1.71966e+08	2.51067e+08	2.89173e+08	2.48866e+08	1.82191e+08	1.58653e+08	1.99645e+08	1.635e+08	1.12073e+08	1.17168e+08	2.45538e+08	2.11159e+08	1.98289e+08	2.03888e+08	2.84248e+08	1.29289e+08	2.27493e+08	9.90576e+07	2.14215e+08	1.13388e+08	8.99893e+07	1.27905e+08	1.64085e+08	1.01761e+08	1.2472e+08	1.4244e+08	1.14773e+08	1.54597e+08	2.08821e+08	1.44377e+08	1.35432e+08	1.76107e+08	1.69507e+08	1.78647e+08	1.8683e+08	1.81325e+08
2-Propylpiperidine	0.981564	B(ii)			225.448	128.143	forward	1.2264e+08	1.29763e+08	1.3244e+08	1.19457e+08	1.21032e+08	1.21782e+08	1.11426e+08	1.12601e+08	2.20315e+08	1.2259e+08	1.3476e+08	1.12628e+08	1.25341e+08	1.14445e+08	1.14327e+08	1.14217e+08	1.25217e+08	1.29486e+08	2.08549e+08	1.22064e+08	2.19548e+08	1.18419e+08	1.2868e+08	1.18e+08	1.08478e+08	2.14695e+08	1.3405e+08	1.2414e+08	1.30949e+08	1.12854e+08	1.29199e+08	1.19347e+08	1.12602e+08	1.25879e+08	1.21963e+08	1.19798e+08	1.20438e+08
Methylpyrazine	0.981521	B(ii)			445.245	95.0608	forward	2.29941e+07	2.93177e+07	3.1291e+07	2.63125e+07	2.61545e+07	2.71623e+07	2.469e+07	3.03144e+07	2.48385e+07	2.55121e+07	2.0983e+07	1.76941e+07	2.45071e+07	2.7513e+07	3.13253e+07	2.57779e+07	2.6177e+07	2.51857e+07	3.04236e+07	2.43727e+07	3.32126e+07	2.64718e+07	3.29006e+07	3.33493e+07	2.12621e+07	2.80033e+07	2.69237e+07	2.93707e+07	2.49174e+07	2.75853e+07	2.36205e+07	2.21351e+07	2.65193e+07	2.7923e+07	3.07441e+07	3.06946e+07	2.88046e+07
L-Glutamine	0.981197	B(ii)			396.406	147.076	forward	5.97302e+07	9.13579e+07	5.92536e+07	8.09076e+07	6.07614e+07	4.76746e+07	1.11315e+08	4.4626e+07	1.05519e+08	8.68907e+07	1.11474e+08	8.69702e+07	9.58505e+07	1.00148e+08	4.00609e+07	7.82306e+07	4.50395e+07	9.8215e+07	3.62079e+07	1.03711e+08	1.05669e+08	6.23812e+07	4.86034e+07	7.28423e+07	9.07466e+07	7.60361e+07	1.10999e+08	1.30137e+08	1.48234e+08	1.29847e+08	2.84056e+07	3.34352e+07	8.16475e+07	9.33293e+07	9.27619e+07	9.34341e+07	9.27305e+07
Valyl-Proline	0.98116	B(ii)			341.63	215.139	forward	1.33748e+07	3.64975e+07	4.51409e+07	7.24024e+07	4.21164e+07	3.77491e+07	5.01499e+07	3.62386e+07	5.2965e+07	8.0225e+07	1.22157e+07	1.53439e+07	4.00392e+07	9.56838e+07	2.3794e+07	2.68985e+07	3.668e+07	3.15661e+07	6.35851e+07	2.82901e+07	7.83367e+07	5.47644e+07	1.98825e+07	4.10872e+07	2.35109e+07	5.48658e+07	2.6043e+07	1.05981e+07	4.12969e+07	3.93027e+07	4.93038e+07	6.1797e+07	4.46967e+07	4.87145e+07	4.49376e+07	4.73611e+07	1.7828e+07
Histamine	0.980776	B(ii)			445.318	110.071	forward	3.67109e+07	5.55153e+07	6.16232e+07	4.77314e+07	5.43157e+07	4.8805e+07	3.59029e+07	5.13619e+07	4.2916e+07	5.25018e+07	3.23235e+07	3.11261e+07	4.26809e+07	4.88863e+07	5.17738e+07	4.70297e+07	4.79914e+07	4.56364e+07	6.78919e+07	4.03072e+07	5.97209e+07	5.42301e+07	5.83892e+07	6.34591e+07	3.7825e+07	5.84427e+07	4.37345e+07	5.08238e+07	4.88862e+07	5.0245e+07	4.4468e+07	4.20133e+07	4.8566e+07	4.80462e+07	5.0566e+07	5.11591e+07	4.94961e+07
3,3,5-triiodo-L-thyronine-beta-D-glucuronoside	0.980647	B(ii)			296.022	132.102	forward	7.85496e+07	1.08682e+08	8.51104e+07	1.16568e+08	1.59426e+08	2.1968e+08	2.38854e+08	1.42788e+08	9.29868e+07	8.50629e+07	8.9992e+07	9.44217e+07	1.0162e+08	1.67193e+08	1.4556e+08	1.22951e+08	7.78513e+07	6.68791e+07	7.73829e+07	9.87464e+07	1.12359e+08	1.04846e+08	1.28581e+08	1.08831e+08	9.5139e+07	1.04833e+08	6.3747e+07	1.05626e+08	1.08274e+08	1.108e+08	1.57074e+08	1.67798e+08	1.20506e+08	1.31422e+08	1.28873e+08	1.27336e+08	1.32244e+08
Sphinganine	0.980483	B(ii)			62.6188	302.305	forward	2.2703e+06	6.13151e+06	2.39603e+06	5.74732e+06	1.86072e+06	7.36282e+06	3.09633e+06	4.53418e+06	3.15307e+06	3.70359e+06	1.45564e+06	8.52687e+06	2.99263e+06	5.15027e+06	2.65745e+06	7.28394e+06	6.35092e+06	2.52214e+06	6.80059e+06	1.85426e+06	4.0233e+06	3.35769e+06	9.60988e+06	8.856e+06	6.89394e+06	6.33881e+06	3.12291e+06	5.88833e+06	1.86508e+06	4.86217e+06	6.71517e+06	2.65061e+06	1.15709e+07	1.30959e+07	1.23464e+07	1.2721e+07	1.29836e+07
Proline betaine	0.980076	B(ii)			290.266	144.102	forward	3.04045e+08	4.13102e+08	5.14969e+08	3.18904e+08	4.63729e+08	3.40463e+08	3.63373e+08	2.6271e+08	3.42673e+08	3.75139e+08	2.50007e+08	6.70081e+08	2.07439e+08	2.57649e+08	4.92578e+08	2.60547e+08	1.56703e+08	3.34168e+08	2.41667e+08	5.09565e+08	4.43232e+08	2.49641e+08	2.58594e+08	2.31963e+08	2.94291e+08	3.56356e+08	3.29071e+08	4.02791e+08	3.89799e+08	3.89005e+08	3.17099e+08	4.85458e+08	3.55972e+08	3.63781e+08	3.66306e+08	3.52537e+08	3.71457e+08
1-(2,3-Dihydro-1H-pyrrolizin-5-yl)-1,4-pentanedione	0.980018	B(ii)			239.042	206.118	forward	4.05622e+06	5.0864e+06	3.49571e+06	5.04747e+06	4.1081e+06	3.53356e+06	3.46209e+06	3.9262e+06	5.37397e+06	4.26973e+06	3.1572e+06	4.80012e+06	5.06102e+06	3.58212e+06	4.71847e+06	3.34719e+06	3.75901e+06	4.38232e+06	3.92801e+06	3.86757e+06	4.84343e+06	2.7075e+06	3.63327e+06	4.11124e+06	1.79312e+06	3.8948e+06	4.08898e+06	4.62978e+06	4.29817e+06	2.35803e+06	3.29943e+06	3.08135e+06	3.11307e+06	3.04864e+06	4.54586e+06	4.34064e+06	4.88586e+06
D-Apiose	0.979614	B(ii)			92.5107	151.062	forward	827451	2.04133e+06	1.35646e+06	1.56503e+06	1.79206e+06	2.62208e+06	1.45757e+06	2.086e+06	1.85394e+06	652624	1.67422e+06	1.39075e+06	2.19071e+06	1.55827e+06	1.15163e+06	880850	1.65772e+06	1.07811e+06	2.28364e+06	762235	2.28673e+06	1.59635e+06	2.15209e+06	2.13261e+06	2.32254e+06	2.00113e+06	2.03769e+06	1.084e+06	1.52058e+06	2.03652e+06	1.63931e+06	1.7815e+06	1.25172e+06	1.28677e+06	1.46498e+06	1.29363e+06	1.34748e+06
2-Furancarboxaldehyde	0.979613	B(ii)			459.911	97.0289	forward	9.32962e+06	5.72611e+06	6.12413e+06	4.14223e+06	5.39997e+06	5.07514e+06	4.57149e+06	5.63444e+06	5.27962e+06	2.42238e+06	3.05892e+06	1.1367e+07	5.23487e+06	5.7856e+06	6.25589e+06	1.3171e+07	5.30936e+06	6.31709e+06	6.11846e+06	4.51838e+06	5.67208e+06	4.68209e+06	5.2618e+06	5.80706e+06	4.43835e+06	5.1515e+06	5.11683e+06	5.28943e+06	4.94048e+06	5.58238e+06	1.79306e+06	4.33e+06	3.27573e+06	5.4294e+06	4.6403e+06	2.84321e+06	5.82715e+06
Cyclic AMP	0.979246	B(ii)			296.112	330.06	forward	399321	325781	278421	244772	330672	309183	378267	295235	419493	375191	437570	312670	205228	262147	418113	362861	366278	242370	294802	396601	346395	297188	335707	295307	218570	250742	206266	162859	260422	275922	248001	235263	284719	372536	336730	337010	335622
5-Aminoimidazole	0.978765	B(ii)			241.261	84.0561	forward	1.26831e+06	789679	1.15531e+06	404346	903465	825926	920916	1.06832e+06	575918	1.07307e+06	838126	1.01227e+06	1.01652e+06	617694	967121	1.59715e+06	836340	1.39076e+06	624232	520575	663448	940736	492829	813239	252356	821533	743969	871619	741880	134179	1.04102e+06	1.26183e+06	927349	798823	1.10704e+06	1.12161e+06	872805
L-Serine	0.978764	B(ii)			410.722	104.034	forward	1.65854e+07	1.53475e+07	1.5579e+07	2.1743e+07	1.81294e+07	2.04662e+07	2.20356e+07	1.74515e+07	1.65819e+07	1.42431e+07	1.80464e+07	2.02453e+07	1.56745e+07	1.91498e+07	1.80317e+07	1.42808e+07	1.57073e+07	2.26636e+07	1.17031e+07	1.44214e+07	1.97618e+07	1.9237e+07	1.87744e+07	1.50881e+07	1.44806e+07	1.45875e+07	2.08058e+07	1.97631e+07	1.61238e+07	2.10454e+07	1.66509e+07	1.71104e+07	1.8499e+07	1.86449e+07	1.77212e+07	1.7859e+07	1.89202e+07
Methyl 2-aminobenzoate	0.978528	B(ii)			379.456	152.071	forward	5.62371e+06	4.73761e+06	4.88286e+06	5.08384e+06	5.54053e+06	4.17911e+06	3.88328e+06	4.66101e+06	4.44748e+06	5.20876e+06	5.49022e+06	4.75163e+06	4.65265e+06	4.93001e+06	5.08321e+06	5.11005e+06	4.12809e+06	4.61419e+06	3.47488e+06	3.31038e+06	3.88406e+06	4.29782e+06	3.69867e+06	3.94952e+06	3.81529e+06	3.7161e+06	3.25233e+06	4.93932e+06	4.30396e+06	4.08704e+06	3.2625e+06	3.62293e+06	4.78104e+06	4.61046e+06	3.98086e+06	4.75202e+06	4.9586e+06
gamma-Aminobutyric acid	0.978417	B(ii)			402.841	102.055	forward	5.58352e+06	1.20905e+07	8.44173e+06	1.20782e+07	7.74129e+06	8.39926e+06	8.86681e+06	5.0672e+06	1.47554e+07	7.96281e+06	7.96318e+06	7.97751e+06	1.10038e+07	1.40035e+07	1.24796e+07	6.23315e+06	3.2205e+06	5.16867e+06	6.14205e+06	1.03508e+07	1.77371e+07	7.87408e+06	8.765e+06	1.33013e+07	5.63629e+06	6.57766e+06	1.27286e+07	1.22199e+07	1.10872e+07	9.10599e+06	4.18394e+06	5.05362e+06	9.53251e+06	9.58263e+06	9.9867e+06	9.45939e+06	9.68246e+06
Glucosamine 6-phosphate	0.978334	B(ii)			480.434	258.039	forward	1.53468e+07	1.34621e+07	1.30453e+07	8.69577e+06	1.2303e+07	8.62542e+06	8.44935e+06	1.72628e+07	1.23851e+07	8.2584e+06	1.16909e+07	1.03469e+07	1.27753e+07	1.06954e+07	1.39329e+07	1.92861e+07	9.48859e+06	1.86987e+07	7.02679e+06	1.10624e+07	8.48306e+06	6.72172e+06	9.60686e+06	7.38973e+06	2.85698e+06	8.79729e+06	8.08397e+06	8.06445e+06	8.49172e+06	8.22205e+06	7.70979e+06	1.04446e+07	1.02344e+07	9.52032e+06	1.07431e+07	1.19931e+07	1.37505e+07
Uridine	0.978124	B(ii)			167.485	243.062	forward	6.67844e+07	1.02172e+08	7.42557e+07	1.00686e+08	8.39974e+07	6.99394e+07	1.94066e+08	5.7915e+07	8.66402e+07	7.0386e+07	7.77421e+07	7.5089e+07	9.58174e+07	6.13357e+07	6.78531e+07	5.58991e+07	7.73962e+07	6.45796e+07	5.31962e+07	1.02185e+08	9.82465e+07	8.04395e+07	1.15465e+08	9.73279e+07	5.28951e+07	6.73638e+07	5.82964e+07	1.0007e+08	1.07835e+08	1.01204e+08	5.25651e+07	8.1436e+07	9.11687e+07	9.23051e+07	9.38159e+07	9.37692e+07	9.56557e+07
1-(2,3-Dihydro-6-methyl-1H-pyrrolizin-5-yl)-1,4-pentanedione	0.977944	B(ii)			217.516	220.133	forward	1.56823e+06	1.98176e+06	1.85989e+06	2.35319e+06	1.48706e+06	1.38367e+06	1.71356e+06	1.47595e+06	2.24426e+06	2.5979e+06	1.69166e+06	2.56244e+06	1.71378e+06	1.93237e+06	3.0132e+06	1.35062e+06	1.09642e+06	1.18498e+06	1.84449e+06	1.55075e+06	1.90889e+06	1.51159e+06	1.7427e+06	1.59152e+06	1.1069e+06	1.63297e+06	1.51405e+06	1.54039e+06	1.5899e+06	1.35475e+06	1.18042e+06	1.47808e+06	1.8541e+06	1.82043e+06	1.83462e+06	1.72265e+06	1.74254e+06
Maleic acid	0.97782	B(ii)			372.094	115.003	forward	7.39932e+07	8.17704e+07	6.63589e+07	8.86083e+07	1.04096e+08	8.97283e+07	1.72914e+08	6.08857e+07	7.44936e+07	6.37184e+07	7.78226e+07	5.07059e+07	8.30825e+07	9.60235e+07	7.2474e+07	6.5367e+07	4.37598e+07	3.94611e+07	5.03953e+07	7.58753e+07	9.53787e+07	7.69138e+07	8.51428e+07	7.26488e+07	8.29218e+07	7.66911e+07	7.93374e+07	8.66846e+07	1.03995e+08	8.97393e+07	5.38535e+07	5.91938e+07	8.34354e+07	8.64886e+07	8.78102e+07	8.39389e+07	8.11404e+07
Mizolastine	0.977721	B(ii)			249.772	217.106	forward	3.08347e+06	2.74951e+06	1.61152e+06	1.85014e+06	3.11011e+06	1.89101e+06	1.67094e+06	1.83525e+06	2.08243e+06	3.53702e+06	1.9444e+06	2.63622e+06	2.87591e+06	2.90322e+06	3.02788e+06	2.61925e+06	3.68778e+06	2.4271e+06	1.75735e+06	3.1788e+06	1.93823e+06	2.92397e+06	1.42884e+06	1.51698e+06	1.06981e+06	4.0078e+06	3.15443e+06	1.52171e+06	2.64042e+06	2.95866e+06	2.67338e+06	3.80208e+06	2.53138e+06	3.23822e+06	2.91424e+06	3.05903e+06	3.11131e+06
1H-Indole-3-carboxaldehyde	0.97741	B(ii)			46.5919	146.06	forward	5.42741e+06	6.64855e+06	3.37884e+06	4.01963e+06	4.98791e+06	7.77337e+06	7.2562e+06	5.58595e+06	4.28497e+06	3.57624e+06	3.81754e+06	2.73253e+06	3.28065e+06	5.88781e+06	5.60105e+06	3.55671e+06	4.30925e+06	4.19755e+06	4.92392e+06	3.28325e+06	3.99509e+06	5.79276e+06	4.73248e+06	4.20538e+06	4.61356e+06	3.78182e+06	5.59417e+06	3.39608e+06	3.34808e+06	3.68763e+06	5.50725e+06	7.51093e+06	4.88437e+06	4.60546e+06	4.80267e+06	4.58987e+06	4.55673e+06
N-Acetylhistidine	0.97736	B(ii)			445.201	198.087	forward	7.05881e+07	9.17509e+07	9.7906e+07	7.8091e+07	8.85482e+07	8.46597e+07	7.28586e+07	9.5572e+07	7.98517e+07	7.6683e+07	6.11117e+07	5.45396e+07	7.86297e+07	8.86504e+07	1.02652e+08	8.59639e+07	8.63737e+07	7.90767e+07	9.79156e+07	6.92686e+07	9.79382e+07	8.52461e+07	9.92321e+07	9.44566e+07	6.3498e+07	8.9036e+07	8.14803e+07	8.22205e+07	8.26015e+07	8.84574e+07	7.43395e+07	7.06748e+07	8.22382e+07	8.53367e+07	8.43364e+07	8.39562e+07	8.80519e+07
1-Kestose	0.976614	B(ii)			472.053	527.159	forward	334276	626731	548985	979877	630066	882982	421427	1.01543e+06	675854	1.17126e+06	892185	606630	1.30295e+06	600832	1.45053e+06	1.51033e+06	155004	514533	1.41347e+06	646783	1.13734e+06	1.74723e+06	1.26995e+06	1.56105e+06	1.24264e+06	727478	1.07968e+06	2.44704e+06	666027	1.40527e+06	362524	788040	1.03146e+06	1.00051e+06	1.20918e+06	1.12965e+06	1.16113e+06
Anserine	0.97634	B(ii)			439.731	241.129	forward	1.30686e+09	1.0683e+09	1.52693e+09	1.40069e+09	1.27862e+09	1.13574e+09	2.14642e+09	1.28375e+09	1.47327e+09	1.38523e+09	1.35005e+09	9.77505e+08	1.14684e+09	1.84963e+09	1.30515e+09	1.57154e+09	1.53857e+09	1.39781e+09	1.63176e+09	1.66908e+09	1.92067e+09	1.54509e+09	1.45061e+09	1.28842e+09	8.33459e+08	1.53022e+09	1.31985e+09	1.2671e+09	1.22877e+09	1.27188e+09	1.60572e+09	1.38074e+09	1.22966e+09	1.52113e+09	1.4993e+09	1.5652e+09	1.54113e+09
3-Methylguanine	0.976281	B(ii)			210.736	166.072	forward	2.08532e+06	2.79014e+06	1.99316e+06	2.593e+06	3.11596e+06	2.62905e+06	1.78248e+06	2.78809e+06	2.18022e+06	1.63437e+06	1.8281e+06	2.41001e+06	7.69551e+06	2.27259e+06	2.62667e+06	2.20524e+06	1.74866e+06	2.06716e+06	1.93303e+06	2.4009e+06	2.95863e+06	2.49431e+06	2.42206e+06	1.70565e+06	6.42228e+06	8.01036e+06	9.54871e+06	2.27313e+06	2.38899e+06	1.89702e+06	1.95745e+06	2.84176e+06	2.10472e+06	2.18457e+06	2.58563e+06	2.72231e+06	2.33091e+06
Tetracosanoic acid	0.976117	B(ii)			36.0288	367.358	forward	1.1459e+07	1.19794e+07	3.29461e+06	4.95269e+06	5.21165e+06	1.20949e+07	3.73227e+06	1.08784e+07	2.71197e+07	3.5147e+06	6.71996e+06	8.159e+06	5.89076e+06	9.41228e+06	1.42524e+07	4.33714e+06	7.53396e+06	6.81789e+06	8.15502e+06	6.59198e+06	5.3859e+06	5.43654e+06	1.38624e+07	3.78035e+06	7.5396e+06	9.51384e+06	1.60301e+07	4.19579e+06	1.1064e+07	1.61782e+07	5.5666e+06	5.19957e+06	5.92882e+06	5.98268e+06	5.37416e+06	5.93789e+06	7.38494e+06
Succinic anhydride	0.976026	B(ii)			34.3331	99.0078	forward	2.0218e+06	2.4939e+06	2.47185e+06	3.05279e+06	2.28393e+06	2.72474e+06	2.84513e+06	2.9749e+06	3.22204e+06	3.481e+06	3.08771e+06	2.94958e+06	3.70763e+06	2.57036e+06	2.46447e+06	2.72423e+06	3.49449e+06	2.86623e+06	1.8652e+06	2.55565e+06	3.73019e+06	2.22799e+06	2.87862e+06	2.7802e+06	1.6331e+06	2.25241e+06	2.91175e+06	3.50305e+06	3.53046e+06	2.68598e+06	2.9613e+06	3.03246e+06	2.59908e+06	2.4167e+06	2.31556e+06	3.61473e+06	3.85106e+06
D-Malic acid	0.975989	B(ii)			507.313	133.013	forward	1.70595e+07	1.63578e+07	2.81817e+07	2.81575e+07	5.90808e+07	3.22772e+07	5.42123e+07	2.252e+07	3.61494e+07	1.7144e+07	4.64591e+07	1.51673e+07	4.34428e+07	2.0596e+07	2.13257e+07	1.70406e+07	1.58357e+07	1.46529e+07	1.71816e+07	4.96587e+07	3.26517e+07	1.95232e+07	2.42092e+07	3.99217e+07	2.42136e+07	2.46633e+07	1.67606e+07	2.02898e+07	4.49848e+07	1.90697e+07	1.24873e+07	2.07575e+07	5.68603e+07	5.04785e+07	1.48054e+07	3.30107e+07	1.62231e+07
Triglochinin	0.97515	B(ii)			195.738	360.09	forward	416898	648663	868800	1.02301e+06	811162	760226	257402	749238	591801	756925	750351	822058	2.56436e+06	607450	1.03577e+06	1.79786e+06	645842	496039	1.79776e+06	789903	533739	2.09826e+06	1.34953e+06	1.70429e+06	2.0477e+06	750559	1.07469e+06	1.86969e+06	489406	1.65597e+06	420156	1.2993e+06	641970	751079	1.22305e+06	543914	845637
Xanthine	0.975104	B(ii)			222.558	151.025	forward	307472	2.53939e+06	1.02232e+06	1.31454e+06	1.16576e+06	6.6268e+06	3.72187e+06	1.88234e+06	1.66249e+06	422604	459539	666140	1.4265e+06	1.61282e+06	1.7262e+06	874308	2.47225e+06	620784	3.0254e+06	1.10407e+06	984708	1.95461e+06	1.37322e+06	1.16449e+06	5.71006e+06	216087	2.55553e+06	933084	1.70855e+06	4.37024e+06	4.43667e+06	7.1629e+06	2.32905e+06	2.42442e+06	2.38345e+06	3.31775e+06	3.21879e+06
Pantothenic acid	0.974699	B(ii)			277.115	220.118	forward	6.80199e+07	1.22569e+08	1.10403e+08	9.40986e+07	1.33203e+08	9.20423e+07	1.40385e+08	7.99316e+07	9.45237e+07	9.83969e+07	6.6305e+07	1.7181e+08	9.7542e+07	6.62691e+07	7.49295e+07	1.18144e+08	6.29185e+07	6.89836e+07	6.53663e+07	1.15922e+08	9.82583e+07	6.44985e+07	7.97003e+07	8.11227e+07	7.60404e+07	1.15382e+08	1.68522e+08	1.00156e+08	1.40661e+08	8.66948e+07	8.02718e+07	1.0063e+08	8.32696e+07	1.03855e+08	1.0229e+08	1.14486e+08	1.12689e+08
2,3-Dihydro-5-(3-hydroxypropanoyl)-1H-pyrrolizine	0.973722	B(ii)			35.0591	180.102	forward	2.74621e+06	2.00051e+06	1.71873e+06	2.44231e+06	1.86098e+06	1.53268e+06	2.28461e+06	1.81175e+06	2.72333e+06	1.71866e+06	2.2578e+06	1.6529e+06	1.57739e+06	2.68421e+06	1.71798e+06	3.2382e+06	1.33867e+06	1.61251e+06	1.09006e+06	1.73784e+06	3.8766e+06	1.53292e+06	2.85628e+06	1.82228e+06	3.96836e+06	2.39205e+06	1.62992e+06	1.9839e+06	1.80194e+06	1.91358e+06	1.54523e+06	1.88926e+06	1.9031e+06	2.69753e+06	1.73807e+06	2.30813e+06	3.38401e+06
Nervonyl carnitine	0.973251	B(ii)			718.245	102.128	forward	1.02325e+06	814527	803945	994639	1.39056e+06	949739	824652	601763	804178	1.47596e+06	1.37126e+06	1.27494e+06	838071	1.58946e+06	2.2078e+06	804874	838030	1.44168e+06	1.16492e+06	1.00826e+06	961285	1.02973e+06	1.44691e+06	1.01497e+06	1.03422e+06	1.14292e+06	962752	806015	1.01236e+06	824969	1.60926e+06	1.09889e+06	1.48621e+06	1.21642e+06	934235	758053	932839
2-Ethyl-2-Hydroxybutyric acid	0.973178	B(ii)			125.489	131.07	forward	3.22318e+06	3.42126e+07	0	1.06015e+07	3.98227e+07	1.00825e+08	4.99541e+07	5.24048e+07	2.47098e+07	0	1.3306e+06	2.40749e+07	1.8077e+07	4.31107e+07	3.9003e+07	0	0	0	2.03739e+07	1.56916e+07	2.91612e+07	2.80423e+07	6.5587e+07	1.63759e+06	2.09062e+07	1.54427e+07	2.79837e+07	1.03097e+07	1.46577e+06	4.8029e+07	4.18838e+07	9.0467e+07	3.05231e+07	1.38446e+07	3.57921e+07	3.57919e+07	1.84953e+07
1-Methylhypoxanthine	0.973105	B(ii)			151.942	151.062	forward	2.33137e+06	2.70004e+06	2.66448e+06	2.7986e+06	4.08965e+06	3.8958e+06	1.81175e+06	3.35357e+06	2.67687e+06	2.4954e+06	2.01988e+06	2.84379e+06	2.68972e+06	2.35967e+06	2.75298e+06	3.09888e+06	2.25459e+06	2.56252e+06	2.09273e+06	3.01217e+06	3.16064e+06	3.03862e+06	2.65628e+06	2.6837e+06	2.52457e+06	2.12972e+06	2.6361e+06	2.51853e+06	2.48844e+06	2.56119e+06	1.97963e+06	3.66871e+06	3.00517e+06	3.29164e+06	3.29363e+06	3.08984e+06	3.21288e+06
Glycerol 3-phosphate	0.972328	B(ii)			445.718	173.021	forward	3.14009e+07	5.38098e+07	1.41328e+07	4.35081e+07	1.37079e+07	3.7105e+07	5.03144e+07	4.06197e+07	5.10351e+07	3.08199e+07	6.44096e+07	4.32333e+07	4.6613e+07	1.8971e+07	4.5077e+07	1.15612e+07	3.8592e+07	6.14819e+07	1.08442e+07	6.89755e+07	1.69567e+07	9.44976e+06	4.74726e+07	1.04279e+07	8.7427e+06	3.69184e+07	3.56065e+07	1.70964e+07	1.94596e+07	3.61325e+07	2.64194e+07	5.88992e+07	5.83144e+07	6.00359e+07	1.54104e+07	1.56338e+07	1.40321e+07
2-Hydroxyethanesulfonate	0.971808	B(ii)			127.737	124.99	forward	1.05263e+08	9.93715e+07	9.66604e+07	1.00817e+08	1.5434e+08	7.90938e+07	3.39708e+08	7.4341e+07	1.61576e+08	1.46693e+08	8.54459e+07	2.25258e+07	1.33034e+08	1.15469e+08	1.30982e+08	1.14113e+08	1.03247e+08	6.48269e+07	1.05755e+08	1.14795e+08	1.5104e+08	1.62806e+08	1.37464e+08	1.66246e+08	1.5047e+08	1.50735e+08	1.70721e+08	1.24579e+08	2.23628e+08	1.16162e+08	8.64235e+07	1.16553e+08	1.35913e+08	1.40425e+08	1.40307e+08	1.42523e+08	1.41755e+08
Cholic acid	0.971072	B(ii)			212.245	407.28	forward	569777	1.08753e+06	623760	232308	1.08203e+06	673940	1.05456e+06	902854	343824	212054	404389	139653	1.58984e+06	586579	232122	288139	1.73047e+06	762071	701848	296127	991484	795237	886553	5.77129e+06	2.04773e+07	1.47422e+06	2.30103e+06	3.9153e+06	845920	784355	574288	592812	1.71137e+06	1.55234e+06	1.35847e+06	1.6438e+06	1.72784e+06
L-trans-4-Methyl-2-pyrrolidinecarboxylic acid	0.970988	B(ii)			562.255	130.086	forward	5.10674e+07	1.98571e+07	3.20471e+07	3.92598e+07	1.71461e+07	2.00281e+07	1.27571e+07	4.29852e+07	8.82878e+07	3.13077e+07	4.28014e+07	8.31782e+07	3.42179e+07	8.84536e+07	1.04477e+07	1.80967e+07	1.99624e+07	1.89939e+07	1.057e+07	3.62531e+07	2.30989e+07	2.89937e+07	3.16548e+07	7.1634e+06	1.01053e+07	4.68327e+07	2.22451e+07	3.65256e+07	3.42425e+07	1.53228e+07	2.83825e+07	1.60676e+07	2.90314e+07	3.23036e+07	3.26682e+07	3.3904e+07	3.49929e+07
Triacetin	0.970945	B(ii)			298.141	219.086	forward	306654	426037	539594	487402	574145	358173	428695	669652	417342	506264	391460	407415	2.08079e+06	1.34188e+06	484500	502697	432454	1.76972e+06	544269	1.63843e+06	476106	536792	413410	444174	440285	416935	373207	1.27994e+06	454967	632366	291017	491913	608378	583765	342318	581570	600898
Phytosphingosine	0.970475	B(ii)			59.1697	318.3	forward	635110	733464	542404	802541	598305	688224	610535	703855	470909	433712	576651	841909	580671	742117	584375	1.03257e+06	678503	477211	774691	425524	685652	657361	872879	1.00982e+06	896973	906142	829527	762179	459891	703782	1.14908e+06	531858	1.74581e+06	1.79041e+06	1.94267e+06	1.7595e+06	1.77794e+06
3'-AMP	0.970474	B(ii)			443.084	346.056	forward	1.51128e+06	1.23213e+06	5.04294e+06	1.09373e+07	3.58775e+06	2.29168e+06	2.34101e+06	1.16856e+06	1.82598e+06	2.17297e+06	1.42749e+06	8.26022e+06	3.03893e+06	2.95643e+06	1.37894e+06	2.70271e+06	940348	1.3217e+06	1.01053e+06	1.48924e+06	2.77507e+06	1.32642e+06	1.1821e+06	6.66669e+06	2.15761e+06	2.55556e+06	1.22508e+06	3.13175e+06	2.06187e+06	2.64689e+06	1.10442e+06	1.74048e+06	2.49628e+06	4.15906e+06	3.06679e+06	3.50613e+06	3.09589e+06
Benzoic acid	0.96916	B(ii)			136.77	121.029	forward	2.27815e+07	1.54551e+08	1.26007e+08	3.98318e+07	3.38546e+07	3.45239e+08	4.41998e+07	4.65006e+07	3.66136e+07	1.95815e+07	2.29548e+07	2.51783e+07	6.52623e+07	2.04714e+07	2.70842e+07	2.52612e+07	2.01337e+08	2.26262e+07	4.48637e+07	9.46855e+07	2.51721e+07	8.56522e+07	1.82678e+08	1.54826e+07	6.26962e+08	2.33396e+07	8.03423e+07	1.7336e+07	5.54858e+08	3.81433e+08	5.75195e+08	1.97694e+07	1.39834e+08	1.39698e+08	1.43098e+08	1.44212e+08	1.08357e+08
2-Amino-1,6-dimethylfuro[3,2-e]imidazo[4,5-b]pyridine	0.968734	B(ii)			286.721	203.09	forward	1.97842e+06	4.86453e+06	5.47142e+06	2.91582e+06	3.74875e+06	3.48928e+06	3.27138e+06	5.21722e+06	4.24044e+06	3.56914e+06	2.95306e+06	3.01151e+06	3.38418e+06	3.58161e+06	4.63652e+06	4.06981e+06	4.5608e+06	4.14184e+06	4.4038e+06	4.43042e+06	4.44308e+06	3.90964e+06	3.4788e+06	4.3221e+06	1.93402e+06	4.49021e+06	3.15693e+06	3.4071e+06	3.29404e+06	3.18557e+06	4.27152e+06	3.83117e+06	3.82124e+06	3.71976e+06	3.58965e+06	3.4424e+06	4.34409e+06
Pyrimidine	0.968462	B(ii)			445.298	81.0453	forward	1.60097e+06	1.7959e+06	2.50326e+06	2.19758e+06	1.90824e+06	1.86872e+06	1.18508e+06	2.02191e+06	1.81086e+06	1.57977e+06	1.54116e+06	1.45102e+06	1.47413e+06	1.88971e+06	2.01522e+06	2.04616e+06	2.35337e+06	1.85773e+06	2.07146e+06	1.51362e+06	1.95704e+06	1.66752e+06	2.38745e+06	2.00389e+06	1.76685e+06	1.87458e+06	2.1322e+06	2.06659e+06	1.83466e+06	1.83355e+06	1.80589e+06	1.51741e+06	1.88357e+06	1.7476e+06	1.92857e+06	1.58524e+06	1.73713e+06
4-Hydroxy-2-butenoic acid gamma-lactone	0.968254	B(ii)			377.191	85.029	forward	2.51568e+06	3.24173e+06	2.59476e+06	3.37238e+06	2.29259e+06	3.17538e+06	2.78964e+06	3.08157e+06	3.49165e+06	3.99902e+06	3.98507e+06	4.21642e+06	3.49198e+06	2.56301e+06	4.29804e+06	4.15885e+06	3.28575e+06	2.78957e+06	3.32908e+06	3.49247e+06	3.38451e+06	3.57264e+06	3.30645e+06	4.54183e+06	2.96261e+06	3.16015e+06	3.09402e+06	4.13103e+06	3.28031e+06	3.2083e+06	2.97073e+06	4.51064e+06	3.19797e+06	2.9112e+06	2.86568e+06	4.26613e+06	3.30925e+06
Ornithine	0.968164	B(ii)			577.313	133.097	forward	9.37478e+06	7.61226e+06	3.20361e+06	5.20912e+06	2.92445e+06	3.08726e+06	2.80288e+06	7.19676e+06	1.27214e+07	4.51544e+06	3.85291e+06	6.00814e+06	4.43272e+06	8.13909e+06	2.93158e+06	3.19826e+06	7.03592e+06	8.24319e+06	3.06709e+06	5.41484e+06	4.52589e+06	2.98482e+06	3.52889e+06	3.44758e+06	3.58585e+06	1.23031e+07	8.2719e+06	3.74393e+06	5.91368e+06	4.24198e+06	4.41179e+06	3.2831e+06	3.48855e+06	4.31249e+06	4.68763e+06	5.32269e+06	5.92173e+06
1-Isothiocyanatopentane	0.967974	B(ii)			43.0926	130.065	forward	922035	1.51038e+06	699183	1.48313e+06	1.62175e+06	2.27494e+06	2.2223e+06	1.7479e+06	1.18857e+06	760211	1.11845e+06	645711	675467	1.63525e+06	3.62652e+06	1.28365e+06	1.60934e+06	1.43386e+06	1.31243e+06	1.50964e+06	1.47275e+06	1.44446e+06	1.44025e+06	971932	2.04742e+06	1.09785e+06	1.49951e+06	1.22034e+06	1.82134e+06	1.40179e+06	1.53525e+06	2.3136e+06	1.39816e+06	1.31397e+06	1.48619e+06	1.40008e+06	1.37449e+06
L-Isoleucine	0.96785	B(ii)			310.985	132.102	forward	3.23313e+07	4.67203e+07	4.07324e+07	5.11051e+07	6.48819e+07	9.369e+07	1.05801e+08	5.50206e+07	3.50647e+07	3.85725e+07	4.71084e+07	5.01811e+07	4.21992e+07	8.03733e+07	6.41168e+07	5.17477e+07	2.75273e+07	3.06395e+07	3.59244e+07	4.05751e+07	5.91037e+07	4.18154e+07	4.71248e+07	4.56912e+07	4.42427e+07	4.32972e+07	3.74544e+07	4.53254e+07	4.17324e+07	6.06581e+07	6.0514e+07	7.87236e+07	8.57524e+07	6.17201e+07	5.88792e+07	5.8613e+07	5.91698e+07
1-Butylamine	0.96737	B(ii)			188.499	74.097	forward	5.41862e+06	5.39831e+06	6.13718e+06	6.69058e+06	5.12215e+06	5.79806e+06	6.72205e+06	5.2488e+06	5.3375e+06	1.5837e+07	2.1697e+07	6.89288e+06	4.27662e+06	5.46645e+06	1.8751e+07	5.47665e+06	7.07101e+06	5.21903e+06	8.12002e+06	9.14664e+06	1.36393e+07	1.47466e+07	1.94965e+07	8.48695e+06	8.73022e+06	6.28316e+06	5.93157e+06	5.133e+06	6.392e+06	2.90728e+07	4.98655e+06	2.00152e+07	6.41642e+07	9.77033e+06	6.67989e+06	5.80036e+06	5.33935e+06
2-Isopropylphenyl methylcarbamate	0.967151	B(ii)			373.783	194.118	forward	1.13461e+07	1.03596e+07	9.75155e+06	1.19053e+07	1.11867e+07	1.06899e+07	1.12002e+07	1.17964e+07	1.14193e+07	9.86798e+06	9.84441e+06	9.71753e+06	1.16107e+07	9.95603e+06	9.552e+06	1.05567e+07	9.71545e+06	1.0087e+07	9.63355e+06	1.01491e+07	9.85679e+06	1.02587e+07	1.05392e+07	1.21847e+07	1.31408e+07	1.13074e+07	1.05827e+07	1.03242e+07	1.04945e+07	1.04196e+07	1.02801e+07	9.81646e+06	9.85116e+06	8.7472e+06	9.21057e+06	8.84638e+06	8.80626e+06
Inosine	0.966597	B(ii)			231.629	267.074	forward	3.29899e+08	3.02729e+08	5.91718e+08	6.01552e+08	3.06902e+08	2.19176e+08	6.19174e+08	1.55123e+08	2.70266e+08	5.28782e+08	3.70416e+08	2.57646e+08	2.96869e+08	2.96197e+08	1.89193e+08	2.31535e+08	4.63615e+08	5.87176e+08	1.9865e+08	2.73911e+08	3.96708e+08	2.68043e+08	3.08529e+08	5.40378e+08	6.19033e+08	6.26259e+08	1.98059e+08	5.67628e+08	7.11076e+08	3.20925e+08	1.25251e+08	1.59886e+08	4.13647e+08	4.03981e+08	4.02972e+08	3.96115e+08	4.04839e+08
Guanosine	0.966488	B(ii)			282.419	284.099	forward	2.04554e+06	1.69823e+06	2.57335e+06	3.37864e+06	2.59511e+06	1.99026e+06	3.43814e+06	1.35607e+06	1.66145e+06	3.07379e+06	2.57735e+06	2.39307e+06	2.14923e+06	1.55276e+06	1.68706e+06	2.1358e+06	2.14113e+06	1.70557e+06	1.3187e+06	2.18067e+06	3.81433e+06	2.6987e+06	2.40566e+06	3.09434e+06	4.2996e+06	2.7068e+06	1.48351e+06	2.9242e+06	3.64779e+06	2.92857e+06	1.47901e+06	2.58517e+06	2.56383e+06	2.78047e+06	2.55548e+06	2.71308e+06	2.64821e+06
L-Arginine	0.966475	B(ii)			562.441	175.119	forward	5.09628e+07	1.86812e+08	1.05768e+08	1.97036e+08	2.35835e+08	1.93514e+08	1.66386e+08	2.07164e+08	2.50382e+08	9.91425e+07	9.12291e+07	1.65936e+08	1.65476e+08	2.43301e+08	1.32234e+08	1.13845e+08	2.39193e+08	1.65437e+08	1.30806e+08	1.18693e+08	2.57135e+08	1.14473e+08	2.39764e+08	1.58831e+08	1.78512e+08	2.7734e+08	1.36982e+08	8.32476e+07	3.27817e+08	1.34641e+08	2.69477e+08	2.02467e+08	1.92012e+08	2.23441e+08	2.29268e+08	2.50971e+08	1.47561e+08
Pentadecanoic acid	0.966307	B(ii)			12.6529	241.217	forward	2.86161e+06	2.63885e+06	3.09778e+06	3.26752e+06	3.09197e+06	3.1927e+06	1.76055e+06	3.08194e+06	2.84359e+06	3.06424e+06	3.18415e+06	3.03236e+06	3.19011e+06	3.18759e+06	3.31088e+06	2.90563e+06	3.11852e+06	1.11722e+07	2.54149e+06	2.9852e+06	3.17856e+06	3.08806e+06	3.04302e+06	4.61978e+06	3.04532e+06	4.42318e+06	2.99372e+06	3.01541e+06	3.036e+06	4.05624e+06	3.00064e+06	3.20737e+06	5.74806e+06	3.20037e+06	2.99456e+06	6.70453e+06	6.04968e+06
Canavanine	0.966244	B(ii)			51.1976	177.102	forward	325190	360595	355225	404548	442158	357323	520595	333724	275725	350942	222775	238376	516145	411934	341699	767766	412019	417760	379448	352945	382357	186953	749005	248920	6.29053e+07	342323	447533	400561	792431	303940	353973	344292	1.68045e+06	825288	1.80301e+06	1.89965e+06	1.86194e+06
Dopamine quinone	0.965299	B(ii)			588.865	152.071	forward	1.13866e+07	1.01159e+07	1.0894e+07	2.17683e+07	1.52215e+07	7.31805e+06	2.29589e+07	6.79388e+06	5.6641e+06	1.1111e+07	7.46396e+06	1.11818e+07	2.21529e+07	1.12624e+07	5.6518e+06	1.85026e+07	2.19643e+07	6.84757e+06	6.0364e+06	1.03173e+07	2.07966e+07	4.62684e+06	1.11805e+07	2.36225e+07	1.43451e+07	2.2583e+07	9.9542e+06	7.31127e+06	1.61707e+07	8.37183e+06	5.01348e+06	1.63198e+07	2.00919e+07	1.09687e+07	1.32523e+07	8.23307e+06	6.84129e+06
7-Hydroxy-6-methoxy-alpha-pyrufuran	0.964923	B(ii)			36.2381	321.094	forward	210908	2.508e+06	1.18877e+06	387302	608311	7.96134e+06	195621	444881	339771	30646.4	161102	228807	807762	115567	281971	103818	8.51008e+06	96353.4	612071	2.09994e+06	214060	1.74178e+06	3.39055e+06	0	6.26549e+06	131450	2.96792e+06	0	8.46284e+06	5.61001e+06	7.17077e+06	16868.4	1.54421e+06	1.86788e+06	2.09459e+06	1.95817e+06	1.82946e+06
Acetylhydrazine	0.964481	B(ii)			449.877	75.0559	forward	1.34948e+06	1.18113e+06	3.08194e+06	1.20669e+06	1.67628e+06	1.40254e+06	1.15385e+06	2.02974e+06	1.21843e+06	1.02436e+06	1.11229e+06	1.40911e+06	1.09824e+06	1.00166e+06	1.17608e+06	1.33347e+06	1.73754e+06	1.27334e+06	851659	1.22328e+06	934758	617917	1.07542e+06	969934	712874	781159	955524	1.10248e+06	1.06964e+06	1.01161e+06	1.31663e+06	1.19872e+06	1.07503e+06	1.0141e+06	1.01245e+06	2.86737e+06	1.9031e+06
Oleamide	0.963702	B(ii)			105.809	282.279	forward	1.72601e+07	1.24492e+07	1.75122e+07	1.6736e+07	1.71447e+07	1.78892e+07	2.56027e+07	1.52655e+07	1.80451e+07	1.57481e+07	1.45759e+07	1.17659e+07	1.81828e+07	2.85891e+07	1.81228e+07	1.05149e+07	1.28064e+07	9.50312e+06	1.68564e+07	1.59493e+07	1.72208e+07	2.10028e+07	1.37579e+07	1.92359e+07	3.44399e+07	1.42961e+07	1.51016e+07	1.25086e+07	1.93147e+07	1.62284e+07	2.03272e+07	1.67828e+07	1.56785e+07	1.46829e+07	1.50754e+07	1.49097e+07	1.51556e+07
Pantothenol	0.96369	B(ii)			62.9477	204.124	forward	2.49797e+06	2.23797e+06	1.57218e+06	1.47107e+06	3.42702e+06	1.87991e+06	2.29387e+06	2.99502e+06	1.19409e+06	960348	2.44725e+06	4.77998e+06	1.76124e+06	6.53846e+06	3.75423e+06	2.97592e+06	1.39989e+06	2.1314e+06	2.73143e+06	3.40235e+06	1.10027e+06	3.66737e+06	4.74021e+06	6.62161e+06	1.72371e+07	1.48958e+06	1.99531e+06	959722	1.5816e+06	2.21136e+06	2.51555e+06	701874	3.41439e+06	3.54019e+06	3.29469e+06	3.31474e+06	3.33585e+06
Phenylacetylglycine	0.96334	B(ii)			193.838	192.066	forward	2.52861e+07	5.28128e+07	3.39971e+07	4.31778e+07	4.2397e+07	4.88018e+07	3.65255e+07	3.19622e+07	4.96726e+07	2.42156e+07	2.65341e+07	6.53553e+07	5.79402e+07	3.06111e+07	4.48956e+07	2.85535e+07	4.31775e+07	2.1887e+07	2.89657e+07	3.39507e+07	4.09935e+07	4.00728e+07	3.58712e+07	4.74619e+07	7.51621e+07	1.59522e+07	4.28973e+07	4.18798e+07	6.13225e+07	5.54609e+07	3.21777e+07	3.34799e+07	4.34565e+07	4.31567e+07	4.33076e+07	4.41336e+07	4.35026e+07
4-Deoxyerythronic acid	0.962812	B(ii)			402.112	87.0446	forward	2.13144e+07	2.26006e+07	2.12198e+07	2.05652e+07	1.88954e+07	1.76076e+07	1.9588e+07	2.32057e+07	1.84161e+07	2.26643e+07	2.20966e+07	1.92137e+07	1.6142e+07	1.82748e+07	2.45844e+07	1.94489e+07	2.10973e+07	1.95574e+07	2.1016e+07	1.64227e+07	2.16925e+07	2.42242e+07	1.92986e+07	1.99987e+07	1.65137e+07	1.88487e+07	1.69237e+07	1.88984e+07	1.91853e+07	1.4277e+07	1.9895e+07	2.17303e+07	1.97279e+07	2.04412e+07	1.98296e+07	2.05752e+07	2.05932e+07
Carnosine	0.962655	B(ii)			445.319	225.099	forward	2.78618e+09	4.03224e+09	4.49772e+09	3.44046e+09	3.73303e+09	3.53257e+09	2.80602e+09	3.86091e+09	3.18689e+09	3.75702e+09	2.2705e+09	2.28486e+09	3.07257e+09	3.61914e+09	3.77606e+09	3.54166e+09	3.42732e+09	3.37091e+09	4.83069e+09	2.82614e+09	4.41209e+09	3.90194e+09	4.23943e+09	4.73895e+09	2.71049e+09	4.06817e+09	3.20941e+09	3.64861e+09	3.63796e+09	3.75205e+09	3.24078e+09	3.00828e+09	3.75874e+09	3.62676e+09	3.70413e+09	3.76486e+09	3.62031e+09
Succinic acid semialdehyde	0.962143	B(ii)			381.136	101.023	forward	2.2629e+07	3.66696e+07	2.81081e+07	2.98311e+07	2.98355e+07	2.88314e+07	3.30447e+07	3.26919e+07	4.4015e+07	2.64873e+07	3.33207e+07	2.7072e+07	2.97422e+07	3.18385e+07	3.23586e+07	2.74123e+07	2.48042e+07	2.86683e+07	2.62504e+07	3.15831e+07	3.4576e+07	2.84206e+07	2.94828e+07	2.93655e+07	3.28737e+07	2.74091e+07	4.1006e+07	3.87167e+07	3.42177e+07	3.21156e+07	2.5108e+07	2.68533e+07	3.1003e+07	3.03112e+07	2.99714e+07	3.06427e+07	3.13269e+07
Alanyl-Valine	0.961885	B(ii)			269.816	189.123	forward	1.83669e+06	1.05268e+06	2.28763e+06	2.8823e+06	950317	1.27387e+06	1.02916e+06	620048	869951	2.46144e+06	1.94957e+06	1.74759e+06	1.74741e+06	2.88848e+06	800271	1.79038e+06	1.02675e+06	1.67011e+06	1.15512e+06	996679	2.42684e+06	1.35325e+06	1.00056e+06	1.41569e+06	1.14564e+06	2.22167e+06	1.02423e+06	2.56738e+06	1.6087e+06	1.3621e+06	1.66132e+06	1.01265e+06	977859	1.52598e+06	1.71104e+06	1.63278e+06	1.8743e+06
1-Methylguanosine	0.961189	B(ii)			247.458	298.115	forward	226017	172091	231998	217946	281350	327576	276784	271496	196727	157877	166712	315170	212910	266052	263857	207265	238341	147833	197506	205531	323383	293797	177374	199545	219581	136981	203932	233716	268480	207393	233933	374365	217051	269148	262476	200188	250584
Isokobusone	0.961078	B(ii)			55.1373	221.154	forward	4.23414e+07	3.65946e+07	3.59831e+07	2.81061e+07	2.4331e+07	3.83834e+07	3.55978e+07	2.83487e+07	2.97946e+07	5.98204e+07	3.40091e+07	4.22482e+07	3.51558e+07	4.57768e+07	3.86032e+07	5.16984e+07	3.06903e+07	4.95686e+07	4.07595e+07	3.19107e+07	6.40665e+07	6.58634e+07	3.67878e+07	4.02909e+07	4.59411e+07	5.13498e+07	4.6797e+07	3.10256e+07	5.3475e+07	3.53024e+07	5.24473e+07	3.91318e+07	2.16253e+07	2.10289e+07	2.13826e+07	2.1447e+07	2.1335e+07
Betaine aldehyde	0.960181	B(ii)			377.172	102.092	forward	2.63956e+07	3.34929e+07	2.67528e+07	2.65036e+07	2.52587e+07	3.08138e+07	3.21211e+07	2.94085e+07	3.46991e+07	2.68384e+07	2.92411e+07	3.14112e+07	2.86461e+07	2.77507e+07	3.48709e+07	2.91796e+07	2.74287e+07	2.71699e+07	3.01592e+07	2.70504e+07	4.17903e+07	2.8223e+07	3.06375e+07	2.63282e+07	2.32971e+07	2.64806e+07	3.04267e+07	2.89867e+07	2.95647e+07	3.1043e+07	3.11616e+07	3.77252e+07	3.19467e+07	3.04328e+07	3.04467e+07	3.03235e+07	3.00602e+07
Leonuriside A	0.959374	B(ii)			272.015	333.116	forward	243415	1.65578e+06	1.74792e+06	390976	196569	4.41159e+06	305552	425644	382056	282942	255440	208594	647461	135786	278455	386419	1.04913e+07	147390	589911	1.46239e+06	211077	1.21521e+06	2.48189e+06	249847	2.81575e+07	194818	2.40766e+06	239839	8.45779e+06	6.4889e+06	3.23894e+06	383019	1.56687e+06	2.80902e+06	2.2902e+06	2.22952e+06	2.32579e+06
Taurodeoxycholic acid	0.958892	B(ii)			156.422	498.291	forward	439927	1.59706e+06	948117	1.46404e+06	1.38815e+06	1.42754e+06	944014	1.59025e+06	767950	1.50549e+06	552582	170090	1.49719e+06	770971	1.38622e+06	618813	3.09786e+06	392168	455987	273168	1.32748e+06	745718	1.51005e+06	906126	1.06557e+07	773403	2.14598e+06	2.99668e+06	1.79462e+06	723418	991709	1.94088e+06	1.36644e+06	1.70522e+06	1.25966e+06	1.29716e+06	1.2826e+06
Quinone	0.958881	B(ii)			511.67	109.029	forward	4.02226e+06	3.50106e+06	1.31744e+06	6.53367e+06	783945	2.5706e+06	1.89435e+06	5.07436e+06	3.82072e+06	1.79237e+06	2.43671e+06	3.195e+06	2.87933e+06	3.19665e+06	4.31559e+06	5.21817e+06	5.59836e+06	4.41156e+06	1.65699e+06	2.32251e+06	2.38674e+06	3.05979e+06	2.21714e+06	2.12446e+06	289484	2.21112e+06	1.51075e+06	2.51426e+06	1.559e+06	2.53033e+06	4.37342e+06	2.96676e+06	2.9442e+06	2.96616e+06	3.30013e+06	3.06649e+06	3.57353e+06
1H-Indole-2,3-dione	0.958287	B(ii)			48.88	148.039	forward	8.46965e+06	3.96633e+06	8.0054e+06	4.99181e+06	1.02505e+07	3.59303e+06	1.47693e+07	7.15085e+06	5.42474e+06	8.23249e+06	4.46135e+06	3.7834e+06	4.50864e+06	6.69305e+06	7.69338e+06	3.8667e+06	4.24229e+06	6.39792e+06	2.843e+06	5.14742e+06	1.20085e+07	5.25396e+06	3.9953e+06	7.31941e+06	3.83479e+06	5.47832e+06	7.66298e+06	1.36584e+07	1.01654e+07	8.52283e+06	3.64352e+06	4.34558e+06	1.0203e+07	5.37939e+06	1.1607e+07	5.27135e+06	1.05789e+07
L-Acetopine	0.957659	B(ii)			242.418	233.128	forward	1.17266e+06	2.75833e+06	1.31581e+06	1.98646e+06	1.01252e+06	832588	1.83227e+06	3.05202e+06	1.31555e+06	1.80291e+06	1.58166e+06	1.75117e+06	1.67298e+06	1.3791e+06	1.90205e+06	1.82034e+06	1.0744e+06	1.18961e+06	3.7135e+06	994846	2.02893e+06	1.54046e+06	2.44239e+06	2.97163e+06	938092	1.18618e+06	2.57267e+06	2.62587e+06	1.30102e+06	793958	1.21191e+06	1.41866e+06	1.5021e+06	1.98325e+06	1.91438e+06	1.82878e+06	1.96854e+06
D-Aspartic acid	0.957173	B(ii)			363.027	132.029	forward	4.76182e+06	5.12662e+06	6.84053e+06	4.50627e+06	5.60566e+06	5.98721e+06	6.62519e+06	5.71754e+06	4.93906e+06	6.51814e+06	5.22846e+06	5.09431e+06	4.34706e+06	5.39768e+06	6.13634e+06	4.81481e+06	5.93969e+06	4.80906e+06	6.15416e+06	5.18005e+06	4.57496e+06	6.4937e+06	5.9374e+06	5.22423e+06	6.80814e+06	5.51831e+06	5.09297e+06	4.7021e+06	4.96796e+06	5.47377e+06	6.0433e+06	5.74481e+06	6.28781e+06	6.1034e+06	5.07572e+06	5.19224e+06	4.75235e+06
(+)-2,3-Dihydro-3-methyl-1H-pyrrole	0.955128	B(ii)			577.429	84.0813	forward	6.60603e+06	5.33193e+06	6.75313e+06	6.98729e+06	5.08075e+06	4.75823e+06	2.64287e+06	7.58411e+06	1.48336e+07	5.4316e+06	6.05283e+06	1.45936e+07	7.15633e+06	1.56002e+07	4.01449e+06	4.2184e+06	4.003e+06	4.67279e+06	3.95233e+06	6.48839e+06	6.89056e+06	5.62164e+06	8.37166e+06	4.10861e+06	2.21796e+06	8.28808e+06	5.51126e+06	7.13328e+06	8.6837e+06	4.60696e+06	5.25716e+06	4.23599e+06	5.11414e+06	6.11774e+06	6.49686e+06	6.92985e+06	7.17179e+06
Methionyl-Isoleucine	0.954376	B(ii)			381.696	263.146	forward	3.1545e+07	2.54422e+07	5.3535e+07	4.85155e+07	3.65171e+07	2.87864e+07	3.42052e+07	5.40683e+07	4.05209e+07	2.09556e+07	4.00235e+07	3.51795e+07	3.71199e+07	3.14951e+07	2.07714e+07	2.56921e+07	4.17753e+07	4.73715e+07	3.71496e+07	4.20599e+07	3.7405e+07	2.37065e+07	2.53112e+07	4.23917e+07	4.28917e+07	2.61393e+07	4.00202e+07	2.48131e+07	2.89695e+07	2.15174e+07	2.26053e+07	4.0443e+07	2.71303e+07	3.60553e+07	3.59443e+07	3.72794e+07	3.33861e+07
Oxypurinol	0.952756	B(ii)			295.489	151.025	forward	9.97095e+06	9.64854e+06	1.21812e+07	1.27091e+07	7.94153e+06	7.89595e+06	1.27677e+07	6.03994e+06	9.06715e+06	1.30107e+07	9.27129e+06	1.5544e+07	8.60337e+06	1.13066e+07	6.95683e+06	5.03509e+06	1.1612e+07	1.86112e+07	9.78676e+06	1.5002e+07	1.36381e+07	1.05643e+07	1.01388e+07	1.16166e+07	6.82398e+06	1.17454e+07	1.2604e+07	8.97206e+06	1.37306e+07	8.36592e+06	1.54426e+07	1.10797e+07	1.02872e+07	1.04825e+07	7.15803e+06	9.61987e+06	1.05741e+07
Methionyl-Hydroxyproline	0.9518	B(ii)			438.837	263.111	forward	2.25829e+07	1.90486e+07	3.06023e+07	3.07164e+07	2.44273e+07	2.3182e+07	2.74615e+07	1.96359e+07	2.26973e+07	3.29215e+07	2.46085e+07	2.42403e+07	2.24165e+07	3.03776e+07	2.26051e+07	2.83021e+07	2.68927e+07	2.57735e+07	3.27243e+07	2.76176e+07	3.06664e+07	3.08064e+07	2.68016e+07	2.83414e+07	2.08082e+07	3.10141e+07	2.7388e+07	2.59014e+07	2.5361e+07	2.99426e+07	2.92152e+07	2.51648e+07	2.56288e+07	2.79757e+07	2.69702e+07	2.73946e+07	2.60057e+07
4-Hydroxystachydrine	0.951652	B(ii)			363.721	160.097	forward	8.13298e+06	1.01241e+07	1.06845e+07	9.42449e+06	1.04917e+07	1.02912e+07	1.48859e+07	2.30347e+07	9.3588e+06	8.92319e+06	9.19476e+06	1.46041e+07	6.64158e+06	1.01753e+07	2.51439e+07	1.10794e+07	1.41781e+07	8.2709e+06	9.86723e+06	9.32146e+06	9.225e+06	8.61233e+06	1.05448e+07	9.21964e+06	5.82036e+06	1.10392e+07	1.00525e+07	1.1038e+07	1.069e+07	1.09291e+07	1.1026e+07	1.21078e+07	1.36587e+07	1.31087e+07	1.35104e+07	8.48453e+06	1.01903e+07
Caprylic acid	0.949793	B(ii)			47.8644	143.107	forward	1.91846e+07	2.40484e+07	2.2951e+07	1.82405e+07	1.85933e+07	3.01154e+07	2.25168e+07	1.81023e+07	1.76166e+07	2.2369e+07	1.85645e+07	1.77155e+07	2.10878e+07	2.03389e+07	1.79324e+07	2.34556e+07	2.48041e+07	2.01996e+07	2.47278e+07	1.9648e+07	2.36723e+07	2.49589e+07	2.79732e+07	2.01829e+07	2.93535e+07	1.77909e+07	2.46706e+07	1.79374e+07	2.95582e+07	2.72164e+07	3.44216e+07	2.12364e+07	2.21814e+07	2.2054e+07	2.22201e+07	2.29191e+07	2.26397e+07
Valeric acid	0.949725	B(ii)			656.568	101.06	forward	1.60207e+07	1.2007e+07	2.06591e+07	1.62622e+07	2.55432e+07	1.59275e+07	1.14843e+07	1.70844e+07	2.03652e+07	1.63957e+07	1.40505e+07	1.60437e+07	1.12015e+07	1.63512e+07	1.57794e+07	1.5951e+07	1.39839e+07	1.18488e+07	1.59079e+07	1.52836e+07	1.85119e+07	1.63749e+07	1.83192e+07	1.54108e+07	1.05258e+07	1.63149e+07	1.37408e+07	1.84273e+07	1.00064e+07	1.35491e+07	3.04503e+07	4.70495e+07	1.46961e+07	1.62552e+07	1.55182e+07	2.15446e+07	1.52849e+07
Alpha-dimorphecolic acid	0.948955	B(ii)			36.5836	295.228	forward	2.50356e+06	3.82758e+07	1.57355e+06	7.55217e+06	1.63556e+06	4.68415e+07	1.18758e+07	1.27263e+07	3.24804e+07	4.12829e+06	3.37454e+06	5.5421e+06	1.077e+07	7.61322e+06	8.66415e+06	6.06087e+06	2.77556e+07	5.19359e+06	2.02521e+07	8.73064e+06	4.41562e+06	2.04178e+07	1.4995e+07	5.07357e+06	1.46219e+08	4.40623e+06	2.53689e+07	1.34486e+06	1.45053e+07	4.27205e+07	1.00728e+07	8.13272e+06	1.74973e+07	1.73879e+07	1.80872e+07	1.92206e+07	1.97685e+07
Sphingosine	0.947817	B(ii)			105.891	300.29	forward	1.33431e+07	9.00928e+06	1.34156e+07	1.28688e+07	1.32761e+07	1.45221e+07	2.12345e+07	1.17336e+07	1.37535e+07	8.7451e+06	1.18255e+07	9.21696e+06	1.4683e+07	2.01969e+07	1.36322e+07	7.93721e+06	1.02052e+07	7.49311e+06	1.30619e+07	1.19848e+07	1.34814e+07	1.71334e+07	1.07515e+07	1.4728e+07	2.67652e+07	1.06098e+07	1.19722e+07	9.37637e+06	1.48684e+07	1.2943e+07	1.60233e+07	1.31256e+07	1.23359e+07	1.19666e+07	1.22125e+07	1.2496e+07	1.22791e+07
Melitric acid B	0.947055	B(ii)			194.782	521.112	forward	714926	834310	694896	965309	684221	768141	311539	1.15777e+06	815782	1.45211e+06	1.23281e+06	1.10621e+06	1.83771e+06	789584	2.80917e+06	1.84061e+06	331114	695684	1.63505e+06	866986	1.01882e+06	2.64089e+06	2.09598e+06	1.86456e+06	1.63896e+06	823694	1.11721e+06	2.05573e+06	681540	1.30088e+06	539519	1.69362e+06	871567	1.04392e+06	930848	829905	1.63798e+06
Millefin	0.946064	B(ii)			319.936	351.178	forward	1.71342e+06	1.17947e+06	1.50973e+06	1.36702e+06	1.12202e+06	1.60378e+06	906222	1.24214e+06	982422	1.13579e+06	1.34728e+06	1.75359e+06	1.18833e+06	1.37714e+06	1.30425e+06	855045	1.09532e+06	1.21298e+06	1.33031e+06	633515	985927	1.07176e+06	1.19986e+06	1.10316e+06	1.34911e+06	972399	1.19079e+06	1.24087e+06	1.09672e+06	783384	1.26293e+06	1.65966e+06	1.12639e+06	1.16542e+06	1.20903e+06	1.20512e+06	1.28496e+06
Stachyose	0.945867	B(ii)			510.329	689.211	forward	221027	333502	352871	604520	276662	456310	235554	302556	300634	705328	607781	492491	566026	270277	582462	723017	130860	386378	493993	356157	493579	650536	498098	597961	325232	362940	368036	1.05269e+06	333535	625942	149145	391292	439799	492097	589422	562126	427756
Methoxypyrazine	0.945207	B(ii)			358.975	111.056	forward	2.90364e+06	4.20096e+06	3.40375e+06	2.12969e+06	5.71157e+06	4.573e+06	6.89641e+06	3.76776e+06	3.14391e+06	3.10757e+06	2.08433e+06	2.89646e+06	3.18997e+06	2.06894e+06	4.94133e+06	1.98415e+06	3.94515e+06	3.23563e+06	4.53113e+06	3.61053e+06	4.04535e+06	3.3299e+06	3.68713e+06	5.06107e+06	4.3633e+06	3.15459e+06	4.79458e+06	3.91775e+06	4.64391e+06	4.1626e+06	3.46466e+06	3.53779e+06	3.6194e+06	2.99e+06	3.81862e+06	3.05737e+06	5.36236e+06
Tridecanoic acid	0.94403	B(ii)			39.6791	213.186	forward	1.11791e+07	1.57038e+07	1.41635e+07	1.3323e+07	9.7754e+06	9.40926e+06	1.08853e+07	1.42751e+07	1.34207e+07	1.20019e+07	1.10188e+07	1.21817e+07	1.22594e+07	1.17086e+07	1.38253e+07	1.67119e+07	1.39933e+07	1.40252e+07	1.54541e+07	1.50466e+07	9.52921e+06	1.34243e+07	1.40501e+07	1.40694e+07	6.96414e+06	1.41692e+07	1.26097e+07	1.43834e+07	1.19246e+07	1.12748e+07	1.44542e+07	9.81866e+06	8.11672e+06	9.54059e+06	7.60646e+06	8.69448e+06	9.4931e+06
Glycocholic acid	0.943787	B(ii)			257.846	464.302	forward	80783	86708.2	66574.9	76984.1	427593	168153	194488	845689	14391.7	0	62941.2	0	138974	44855.6	65346.9	99979.9	387774	54399.9	141149	71290.8	148059	318235	147940	535251	4.82064e+06	29984.9	1.28959e+06	480246	235273	114250	130178	280340	423219	390272	377036	338235	364686
2-Methylpiperidine	0.94337	B(ii)			264.085	100.112	forward	3.27518e+06	1.91215e+06	1.54522e+06	2.22804e+06	858432	1.64294e+06	2.11955e+06	1.96437e+06	1.15058e+06	2.37293e+06	2.08774e+06	2.26481e+06	2.40747e+06	2.14503e+06	984639	2.13149e+06	1.14777e+06	1.76849e+06	991620	1.46305e+06	1.31762e+06	1.56032e+06	1.26427e+06	1.65205e+06	1.3726e+06	1.93974e+06	1.69609e+06	1.42278e+06	1.18649e+06	2.11572e+06	1.21151e+06	2.01292e+06	1.66136e+06	2.28502e+06	1.80584e+06	1.62016e+06	1.90278e+06
Imidazoleacetic acid	0.943161	B(ii)			333.637	127.05	forward	1.91454e+07	2.08346e+07	1.094e+07	1.0429e+07	1.15492e+07	1.42056e+07	5.77842e+06	1.68153e+07	1.40585e+07	1.67369e+07	1.33616e+07	1.31706e+07	1.2619e+07	8.76766e+06	1.4465e+07	5.4367e+06	1.41023e+07	1.17885e+07	1.68525e+07	1.62822e+07	1.42582e+07	8.05536e+06	2.57884e+07	1.50043e+07	1.16483e+07	1.46774e+07	1.41986e+07	1.81299e+07	1.76596e+07	1.09528e+07	1.36578e+07	1.40726e+07	1.30718e+07	1.46052e+07	1.35842e+07	8.81841e+06	1.36244e+07
beta-Alanyl-L-lysine	0.942846	B(ii)			562.49	216.135	forward	5.22404e+08	6.27885e+07	2.5428e+08	2.6989e+08	3.96594e+07	9.93978e+07	3.05993e+07	3.63736e+08	4.01807e+08	2.4901e+08	2.96902e+08	5.20532e+08	1.03083e+08	6.26982e+08	3.02835e+07	8.78114e+07	1.28648e+08	8.6376e+07	3.40934e+07	2.37046e+08	5.87224e+07	2.01467e+08	1.2314e+08	1.74531e+07	3.45975e+07	3.03952e+08	8.00985e+07	1.17113e+08	9.53157e+07	5.09803e+07	1.47269e+08	5.79074e+07	1.66714e+08	1.71249e+08	1.71159e+08	1.68065e+08	1.67564e+08
Glutaric acid	0.942691	B(ii)			372.838	131.034	forward	1.75322e+07	1.67108e+07	1.53831e+07	1.43832e+07	1.5897e+07	2.75827e+07	2.0484e+07	1.53379e+07	5.02626e+07	1.74331e+07	1.74086e+07	1.92989e+07	2.2993e+07	1.54851e+07	2.69733e+07	1.86008e+07	2.13214e+07	1.56763e+07	2.01978e+07	2.09226e+07	1.86716e+07	4.68321e+07	1.69208e+07	1.97699e+07	4.69452e+07	3.35861e+07	1.61605e+07	1.50705e+07	1.57923e+07	1.61499e+07	1.74546e+07	1.71265e+07	1.88795e+07	1.64325e+07	1.95388e+07	2.2088e+07	2.59473e+07
Lauroyl diethanolamide	0.942426	B(ii)			35.0949	288.253	forward	2.1659e+06	1.12339e+06	2.46209e+06	1.39372e+06	1.88153e+06	2.44569e+06	1.05895e+06	1.54849e+06	2.20006e+06	793018	1.62966e+06	3.98968e+06	1.89947e+06	2.15269e+06	1.67543e+06	1.39542e+06	1.68626e+06	1.85973e+06	1.95335e+06	1.16069e+06	1.70506e+06	2.14913e+06	829802	1.28261e+06	1.25342e+06	1.8702e+06	1.81501e+06	1.74705e+06	1.9001e+06	1.52029e+06	1.19056e+06	1.46489e+06	1.86689e+06	1.62365e+06	2.19363e+06	1.97201e+06	1.33433e+06
Mannose 6-phosphate	0.94193	B(ii)			480.189	283.019	forward	2.08776e+07	2.96266e+07	2.0393e+07	1.38179e+07	2.24869e+07	1.92526e+07	1.14614e+07	2.23357e+07	3.7709e+07	1.1918e+07	1.66946e+07	1.81651e+07	2.12997e+07	2.24202e+07	2.71359e+07	3.48874e+07	1.56145e+07	2.65236e+07	1.21058e+07	2.50643e+07	1.51812e+07	1.48517e+07	1.77759e+07	1.01447e+07	4.94053e+06	1.51265e+07	1.54713e+07	1.08752e+07	2.28805e+07	1.65392e+07	1.58514e+07	2.15257e+07	2.04449e+07	2.01965e+07	1.78496e+07	2.25886e+07	1.72539e+07
N-(14-Methylhexadecanoyl)pyrrolidine	0.941016	B(ii)			176.64	324.326	forward	4.4906e+06	4.35328e+06	4.02263e+06	4.7154e+06	4.10161e+06	4.44274e+06	4.19134e+06	4.64906e+06	4.36473e+06	4.12755e+06	4.48234e+06	4.02615e+06	4.73571e+06	4.60583e+06	5.18625e+06	5.03322e+06	4.64227e+06	4.66371e+06	4.76171e+06	4.49377e+06	4.88037e+06	4.95e+06	4.76486e+06	4.15851e+06	5.04716e+06	4.03962e+06	4.97567e+06	4.18161e+06	5.04701e+06	4.58972e+06	5.79188e+06	3.95787e+06	4.28264e+06	4.67497e+06	4.80468e+06	4.34682e+06	4.43149e+06
3-Acetamidobutanal	0.940855	B(ii)			53.5134	130.086	forward	1.55453e+07	1.85054e+07	1.79348e+07	1.69613e+07	9.54584e+06	1.44278e+07	1.12827e+07	1.1753e+07	1.55289e+07	1.31174e+07	1.96183e+07	1.79219e+07	7.72729e+06	8.81503e+06	8.77751e+06	1.5089e+07	1.71322e+07	2.02571e+07	9.71829e+06	2.41854e+07	1.96717e+07	1.15149e+07	1.20938e+07	1.37243e+07	1.1051e+07	1.6211e+07	1.75935e+07	1.66058e+07	1.84567e+07	1.13921e+07	1.1969e+07	1.37281e+07	1.59236e+07	1.92799e+07	1.92212e+07	1.7159e+07	1.79147e+07
Palmidin B	0.939873	B(ii)			331.339	495.133	forward	1.61912e+06	2.22103e+06	2.13726e+06	2.18832e+06	1.80634e+06	2.34691e+06	1.14445e+06	2.64017e+06	2.25829e+06	9.53605e+06	2.31722e+06	5.48956e+06	3.0586e+06	2.11529e+06	6.97545e+06	4.96338e+06	1.82886e+06	2.40027e+06	2.94326e+06	4.53921e+06	5.27954e+06	1.06101e+07	2.46955e+06	3.89281e+06	3.13017e+06	4.55423e+06	2.18981e+06	4.09798e+06	1.92074e+06	5.70861e+06	1.42261e+06	3.59702e+06	6.51795e+06	3.97291e+06	3.29679e+06	6.27502e+06	3.96088e+06
Mesalazine	0.939638	B(ii)			79.9421	154.05	forward	5.84702e+06	3.37015e+06	5.29132e+06	4.75662e+06	5.71723e+06	3.77617e+06	1.98687e+06	3.37715e+06	5.11996e+06	833790	3.27609e+06	5.83944e+06	5.62903e+06	3.40952e+06	3.1346e+06	1.03529e+06	4.43283e+06	6.05316e+06	2.17768e+06	4.00789e+06	4.6916e+06	2.18665e+06	2.92425e+06	1.98649e+06	3.8224e+06	6.9041e+06	7.82005e+06	2.13312e+06	3.83537e+06	5.2583e+06	2.59676e+06	4.16002e+06	2.85764e+06	2.0022e+06	1.22586e+06	0	465045
Prostaglandin D2	0.938948	B(ii)			42.0719	351.221	forward	1.80306e+07	1.84039e+07	1.27741e+07	1.34174e+07	2.46129e+07	3.06972e+07	3.47124e+07	1.5347e+07	1.82851e+07	1.10757e+07	1.33458e+07	1.40923e+07	2.4645e+07	1.61244e+07	1.75125e+07	2.38446e+07	1.728e+07	1.14742e+07	1.65203e+07	1.42664e+07	1.35007e+07	2.0469e+07	2.73065e+07	1.51973e+07	5.18607e+07	1.1603e+07	1.99469e+07	1.19179e+07	1.83487e+07	2.52732e+07	1.77353e+07	2.76434e+07	2.64597e+07	2.79068e+07	2.67772e+07	2.71378e+07	2.66942e+07
12-Hydroxydodecanoic acid	0.938935	B(ii)			68.5945	215.165	forward	4.07885e+06	5.98361e+06	6.74209e+06	9.9211e+06	4.52148e+06	5.77035e+06	8.79283e+06	7.13938e+06	5.60498e+06	6.07418e+06	4.96157e+06	7.50982e+06	5.63453e+06	7.87147e+06	6.35476e+06	7.15916e+06	5.83613e+06	6.63204e+06	5.82818e+06	1.03489e+07	4.08147e+06	7.60743e+06	5.60876e+06	5.6027e+06	1.35577e+07	4.89531e+06	3.20975e+06	7.80018e+06	5.36639e+06	6.24972e+06	5.42584e+06	5.31642e+06	5.45629e+06	5.16854e+06	5.25597e+06	5.02376e+06	5.12715e+06
(Â±)-2-(1-Methylpropyl)-4,6-dinitrophenol	0.93796	B(ii)			21.827	239.067	forward	3.4266e+06	2.96621e+06	2.95779e+06	2.05441e+06	2.68445e+06	3.44278e+06	2.55967e+06	3.61173e+06	3.76236e+06	3.36283e+06	3.11694e+06	3.43714e+06	2.95253e+06	2.97385e+06	2.79637e+06	3.96987e+06	2.78858e+06	3.83537e+06	3.66631e+06	3.69416e+06	3.96432e+06	2.83183e+06	3.86184e+06	2.7574e+06	2.39586e+06	4.05049e+06	2.76363e+06	2.89235e+06	3.83446e+06	4.28267e+06	3.6956e+06	2.47718e+07	3.30122e+06	2.29057e+06	3.80308e+06	2.4319e+06	2.52746e+06
Cysteinyl-Tyrosine	0.936153	B(ii)			424.938	285.093	forward	4.58614e+07	3.90858e+07	5.00037e+07	5.56299e+07	4.6127e+07	4.10345e+07	2.64578e+07	3.61125e+07	4.72324e+07	5.65532e+07	5.40768e+07	5.28226e+07	5.23758e+07	5.63581e+07	4.32763e+07	5.77056e+07	4.11125e+07	3.69054e+07	5.24353e+07	4.4121e+07	4.53213e+07	4.40732e+07	4.94802e+07	5.00306e+07	3.19023e+07	4.96148e+07	6.28398e+07	5.2641e+07	4.76302e+07	6.2278e+07	3.23734e+07	4.98418e+07	4.86174e+07	4.93467e+07	4.88478e+07	5.15086e+07	5.4076e+07
4-Hydroxybenzaldehyde	0.935298	B(ii)			35.5461	121.029	forward	4.77386e+07	2.22174e+07	1.91891e+07	2.70339e+07	2.89953e+07	4.15065e+07	1.32728e+07	2.33538e+07	1.53008e+07	2.65694e+07	4.66102e+07	3.55198e+07	2.52379e+07	2.56797e+07	4.10582e+07	1.514e+07	2.39484e+07	4.29434e+07	2.46622e+07	2.54592e+07	4.41259e+07	2.39647e+07	1.3552e+07	1.90273e+07	9.45055e+06	4.34418e+07	2.75415e+07	2.6315e+07	3.5228e+07	2.77383e+07	1.91643e+07	2.12338e+07	2.18547e+07	1.57296e+07	2.3882e+07	1.98016e+07	1.44234e+07
Mukonal	0.935086	B(ii)			297.192	212.074	forward	1.31256e+06	2.12373e+06	1.19802e+06	1.80604e+06	984356	947398	1.24709e+06	1.14311e+06	1.67046e+06	1.69732e+06	1.69274e+06	2.26092e+06	1.28417e+06	1.24563e+06	2.93397e+06	867700	872432	901315	1.42004e+06	1.05416e+06	1.31998e+06	1.28853e+06	1.17913e+06	1.03629e+06	860526	1.01787e+06	1.53671e+06	1.11863e+06	1.07064e+06	825862	775363	1.527e+06	1.38039e+06	1.17255e+06	1.35547e+06	1.32059e+06	1.47002e+06
Methylguanidine	0.932849	B(ii)			324.476	74.0718	forward	5.91009e+06	4.82944e+06	5.9538e+06	5.68587e+06	6.2192e+06	6.46741e+06	4.30257e+06	6.79147e+06	4.56987e+06	5.18914e+06	4.81928e+06	4.95565e+06	4.53302e+06	4.1186e+06	4.73835e+06	4.20384e+06	6.97404e+06	5.17855e+06	5.46914e+06	4.70603e+06	3.41966e+06	5.14459e+06	5.38057e+06	3.15737e+06	3.52267e+06	5.92906e+06	5.03427e+06	4.57616e+06	5.20913e+06	3.63125e+06	6.8077e+06	9.03788e+06	1.41024e+07	4.49066e+06	5.39045e+06	5.04946e+06	5.71987e+06
Leucyl-Methionine	0.931209	B(ii)			201.419	263.142	forward	1.46219e+06	347469	1.68102e+06	3.09595e+06	1.40735e+06	878589	293211	201731	366008	2.20677e+06	1.40701e+06	1.86389e+06	1.43963e+06	3.89601e+06	607203	2.26301e+06	1.05402e+06	488062	962357	1.02283e+06	3.21434e+06	1.05787e+06	614182	955036	790296	2.80184e+06	737384	1.67504e+06	810264	1.90699e+06	2.6852e+06	691229	1.3879e+06	1.35861e+06	1.2956e+06	1.4953e+06	1.35638e+06
Eicosapentaenoic acid	0.930862	B(ii)			37.3111	301.217	forward	6.07386e+06	1.54521e+07	4.54731e+06	1.01538e+07	7.12045e+07	3.02202e+07	1.21589e+08	1.5549e+07	8.06047e+07	4.80269e+07	2.60476e+07	4.89344e+07	9.01797e+07	8.78288e+07	8.43628e+07	2.96801e+07	1.83118e+07	1.17089e+07	1.51709e+07	1.4186e+07	1.05492e+07	1.95704e+07	2.75294e+07	9.38345e+06	9.42466e+08	2.5906e+07	5.6725e+07	4.57633e+07	5.60835e+07	8.12851e+07	1.03126e+08	1.39263e+07	8.65918e+07	9.22751e+07	8.15338e+07	8.83046e+07	1.01089e+08
Palmitoleic acid	0.930149	B(ii)			202.011	253.217	forward	3.71762e+06	4.89659e+06	5.15782e+06	7.72815e+06	7.8802e+06	8.69715e+06	1.92336e+07	9.77718e+06	5.07752e+06	6.40565e+06	5.71913e+06	3.31402e+06	8.38771e+06	1.25815e+07	1.34035e+07	6.03083e+06	4.6211e+06	2.30884e+06	5.5319e+06	4.93099e+06	8.52121e+06	9.30166e+06	6.0202e+06	6.29032e+06	4.75246e+06	6.09873e+06	8.01591e+06	5.52145e+06	5.8314e+06	4.62742e+06	7.15867e+06	7.85746e+06	7.19609e+06	7.63527e+06	7.38853e+06	7.59693e+06	7.15625e+06
Nornantenine	0.929329	B(ii)			271.687	326.146	forward	430478	342705	516094	664251	470211	521119	397735	699064	497551	500886	415014	685955	408221	478802	564173	639109	277314	367607	484252	508909	677032	432385	522017	439279	306104	336465	522944	487651	472572	474064	281042	590339	543079	516416	607715	462664	450452
5-Methylcytosine	0.928692	B(ii)			212.855	126.066	forward	1.20816e+07	1.22091e+07	1.23926e+07	1.1321e+07	1.56574e+07	1.24157e+07	1.39471e+07	1.37826e+07	1.25873e+07	1.00056e+07	1.03069e+07	1.30239e+07	1.15697e+07	1.12279e+07	1.72379e+07	1.34365e+07	1.51529e+07	1.16707e+07	1.10971e+07	1.28312e+07	1.38298e+07	1.22604e+07	1.23228e+07	1.26997e+07	9.3249e+06	1.17767e+07	1.26047e+07	1.38908e+07	1.44762e+07	1.37318e+07	1.29276e+07	1.53874e+07	9.75976e+06	1.32561e+07	1.37151e+07	1.35929e+07	1.39044e+07
L-Gulonolactone	0.928361	B(ii)			93.7541	177.04	forward	6.29569e+07	5.31688e+07	6.12604e+07	6.0211e+07	5.4159e+07	6.00003e+07	4.86067e+07	6.19918e+07	5.41489e+07	5.2415e+07	5.05425e+07	6.53078e+07	6.24612e+07	2.62695e+07	5.34662e+07	5.48476e+07	5.73863e+07	4.7066e+07	6.37418e+07	5.68413e+07	5.51969e+07	5.99564e+07	5.31231e+07	6.59007e+07	6.33337e+07	5.64254e+07	5.69715e+07	5.45018e+07	5.10043e+07	5.72109e+07	4.82551e+07	6.87955e+07	5.53072e+07	5.42961e+07	4.79516e+07	5.11035e+07	4.67025e+07
N1-Methyl-4-pyridone-3-carboxamide	0.926959	B(ii)			75.8775	153.066	forward	1.15278e+07	1.04087e+07	6.20848e+07	1.08498e+07	1.32369e+07	9.77801e+06	3.35638e+07	4.12768e+07	1.03437e+07	2.81631e+07	8.10174e+06	1.27965e+07	6.46923e+07	4.16446e+07	8.4398e+06	2.08117e+07	4.90574e+07	7.24367e+07	5.14846e+06	5.59365e+07	5.55829e+07	3.05678e+07	6.11481e+06	2.50222e+07	4.59768e+07	1.77899e+07	1.83457e+07	3.84327e+07	5.09131e+07	1.25741e+07	7.37157e+06	9.17113e+06	3.78022e+07	3.66175e+07	3.78856e+07	3.33728e+07	3.7724e+07
Syringic acid	0.926797	B(ii)			364.162	197.042	forward	9.46915e+06	2.04732e+06	1.17351e+06	1.10592e+06	1.80763e+06	1.21775e+06	4.42003e+06	4.30372e+06	5.03823e+06	1.31181e+06	2.057e+06	731678	1.8099e+06	1.51397e+06	1.86377e+06	1.91286e+06	464821	940228	1.59254e+06	7.50233e+06	1.54901e+06	7.22656e+06	2.14102e+06	1.2021e+06	884583	1.77349e+06	8.15365e+06	1.63217e+06	1.85956e+06	1.06487e+06	4.48218e+06	1.89607e+06	6.62969e+06	1.62072e+06	1.59388e+06	1.92376e+06	1.53921e+06
Nicotine	0.926167	B(ii)			66.1129	163.123	forward	2.33132e+06	8.49232e+07	1.49065e+06	2.18628e+06	1.27678e+06	6.52408e+07	2.60271e+06	3.89067e+06	1.04476e+07	1.2804e+06	1.1451e+06	1.35307e+06	8.10286e+06	3.79622e+06	3.3881e+06	4.23716e+06	6.81129e+06	2.22695e+06	1.29336e+07	4.14303e+06	847690	7.79411e+06	1.10196e+07	917695	1.44286e+08	1.10005e+06	1.1376e+07	1.20901e+06	1.20609e+07	1.88844e+07	9.39651e+06	744263	1.47262e+07	1.44323e+07	1.51067e+07	1.38176e+07	1.5417e+07
Leucyl-Isoleucine	0.925804	B(ii)			200.327	245.186	forward	5.30338e+06	1.81058e+06	6.17872e+06	1.22244e+07	3.73713e+06	5.03632e+06	2.00028e+06	425361	1.42353e+06	7.1137e+06	3.69102e+06	6.02379e+06	3.96104e+06	9.58352e+06	1.94965e+06	5.12909e+06	3.81049e+06	3.99752e+06	4.27666e+06	3.32179e+06	7.93019e+06	5.10077e+06	2.42552e+06	6.02566e+06	4.21954e+06	8.52877e+06	2.30607e+06	7.06589e+06	3.75618e+06	6.34586e+06	8.54425e+06	2.77769e+06	5.06812e+06	5.05422e+06	5.03254e+06	5.13147e+06	5.14571e+06
2-Pyrrolidinone	0.925669	B(ii)			396.408	86.0605	forward	3.55431e+06	2.53668e+06	2.59936e+06	4.35674e+06	5.02718e+06	2.11441e+06	2.04637e+06	2.95942e+06	3.16283e+06	4.49341e+06	4.72433e+06	3.70805e+06	4.15851e+06	5.11224e+06	4.5019e+06	2.57576e+06	1.97772e+06	3.83413e+06	2.96124e+06	3.50729e+06	3.7143e+06	4.0656e+06	3.70612e+06	3.25724e+06	3.72818e+06	3.67133e+06	3.68999e+06	5.0856e+06	2.68299e+06	5.00167e+06	2.87859e+06	2.54636e+06	3.44293e+06	3.90102e+06	3.43984e+06	3.91577e+06	3.77548e+06
Leucyl-phenylalanine	0.925294	B(ii)			186.814	279.17	forward	6.3438e+06	1.57585e+06	5.35506e+06	8.905e+06	3.369e+06	5.01599e+06	1.86092e+06	1.10757e+06	1.29226e+06	5.92998e+06	2.85189e+06	4.77496e+06	3.29174e+06	8.86765e+06	2.20776e+06	4.58479e+06	3.40296e+06	2.20785e+06	3.19277e+06	2.94136e+06	8.49528e+06	3.70573e+06	2.08784e+06	4.00118e+06	3.6694e+06	6.80354e+06	2.41251e+06	4.58761e+06	2.64489e+06	5.58234e+06	6.22047e+06	2.13638e+06	3.99154e+06	4.34109e+06	4.42525e+06	4.22591e+06	4.60786e+06
Docosanamide	0.924972	B(ii)			594.67	340.358	forward	653920	894869	790802	869440	783201	680327	1.28089e+06	1.11982e+06	712785	1.633e+06	956267	739819	751144	794662	877616	886820	698794	669948	735587	724145	1.18518e+06	841675	743509	914060	780027	706029	631733	1.18594e+06	877014	782586	704214	802318	1.25281e+06	641498	763340	1.21991e+06	669149
N-Acetylglutamic acid	0.924841	B(ii)			383.533	188.056	forward	1.06637e+06	1.98122e+06	924567	2.70628e+06	1.99909e+06	2.27036e+06	1.67707e+06	1.51292e+06	2.31972e+06	798096	1.30552e+06	1.88789e+06	5.48789e+06	1.84765e+06	1.29698e+06	1.66428e+06	1.94007e+06	1.06542e+06	1.36056e+06	1.67542e+06	2.84061e+06	1.02094e+06	1.65746e+06	2.14189e+06	6.60587e+06	1.1039e+06	2.51163e+06	2.07812e+06	1.84235e+06	3.21839e+06	1.57389e+06	1.40136e+06	1.63631e+06	1.66841e+06	1.81829e+06	1.98529e+06	2.63189e+06
Methionyl-Leucine	0.924572	B(ii)			370.401	263.146	forward	1.24814e+09	1.23113e+09	1.26106e+09	1.10098e+09	1.1422e+09	1.25687e+09	1.17231e+09	1.16756e+09	1.00388e+09	1.12243e+09	1.15252e+09	1.21911e+09	1.08332e+09	1.20258e+09	1.25988e+09	1.15461e+09	1.12675e+09	1.20957e+09	1.0999e+09	1.13766e+09	1.04311e+09	1.14238e+09	1.18576e+09	1.12455e+09	8.48231e+08	1.14168e+09	1.07164e+09	1.1292e+09	1.14148e+09	1.10669e+09	1.11743e+09	1.22742e+09	1.22138e+09	1.20674e+09	1.1707e+09	1.1839e+09	1.19027e+09
Ecgonine	0.922674	B(ii)			346.222	186.113	forward	4.45608e+07	5.51463e+07	4.73908e+07	5.2397e+07	4.73161e+07	3.92705e+07	5.27137e+07	4.51994e+07	6.42846e+07	7.04917e+07	5.59714e+07	6.29869e+07	5.60679e+07	6.28285e+07	8.26628e+07	5.50882e+07	4.43306e+07	3.69932e+07	6.75735e+07	5.11412e+07	6.08189e+07	5.63313e+07	7.11221e+07	5.08425e+07	3.59171e+07	5.39599e+07	5.22899e+07	4.11567e+07	4.97103e+07	5.2484e+07	4.25357e+07	5.81032e+07	5.13628e+07	5.51445e+07	5.28445e+07	5.74885e+07	5.90659e+07
NAD	0.921545	B(ii)			443.471	664.118	forward	1.70481e+07	1.69821e+07	1.36588e+07	1.31188e+07	7.45845e+06	1.80657e+07	9.84752e+06	2.0411e+07	1.14786e+07	9.50607e+06	1.48754e+07	1.10712e+07	9.39621e+06	1.45679e+07	1.733e+07	1.67968e+07	1.05265e+07	2.18763e+07	1.05312e+07	1.22881e+07	1.23834e+07	9.34961e+06	1.71168e+07	7.54934e+06	2.97151e+06	1.0642e+07	1.2414e+07	9.21397e+06	9.99884e+06	8.78537e+06	1.15025e+07	1.07336e+07	1.4124e+07	1.29131e+07	1.22183e+07	1.42101e+07	1.34971e+07
3-Hydroxyisovalerylcarnitine	0.921493	B(ii)			361.285	262.165	forward	354361	852169	2.34234e+06	469414	389591	746228	950638	658824	868039	2.36074e+06	430460	505648	446590	447948	8.77919e+06	537090	555287	2.52941e+07	390071	780893	2.18673e+06	441230	4.54046e+06	1.52665e+07	855013	1.69929e+07	847310	1.80197e+06	1.37542e+06	449380	1.17513e+07	939980	524042	355474	1.35444e+06	1.00583e+07	4.02846e+06
Valyl-Phenylalanine	0.920865	B(ii)			199.225	265.155	forward	1.41354e+06	402831	1.36591e+06	2.87516e+06	972695	1.23123e+06	309059	315322	347901	1.77477e+06	792109	532476	1.02121e+06	2.47097e+06	413362	1.41497e+06	853027	780481	1.19228e+06	781132	1.69247e+06	1.20364e+06	545910	1.35477e+06	665118	2.00914e+06	407449	1.28278e+06	519813	1.23628e+06	2.1172e+06	1.02257e+06	1.17878e+06	932019	1.2945e+06	1.14123e+06	1.3082e+06
Pipercitine	0.920511	B(ii)			4.92623	350.342	forward	912146	879630	870147	806466	780401	820406	814954	796384	853960	828537	690651	818825	847570	518397	798062	781283	823778	510736	614046	824572	1.15192e+06	806794	651465	592680	910674	1.00574e+06	789097	766009	1.20405e+06	803450	802919	844246	742935	816527	797563	817281	784726
D-Ornithine	0.92011	B(ii)			563.384	133.097	forward	1.13965e+07	1.38698e+07	5.10658e+06	1.09889e+07	3.99074e+06	3.20086e+06	2.11511e+06	7.46841e+06	1.30737e+07	9.09818e+06	4.55071e+06	8.31896e+06	8.70194e+06	1.15995e+07	3.93427e+06	5.43829e+06	1.22603e+07	1.56169e+07	4.9976e+06	6.94993e+06	7.12901e+06	4.89106e+06	6.21347e+06	6.9675e+06	1.16522e+07	2.46921e+07	1.12667e+07	7.83777e+06	1.25342e+07	6.08618e+06	8.46624e+06	5.57116e+06	8.74173e+06	1.17826e+07	8.94312e+06	1.20519e+07	6.56779e+06
Pyrrolidine	0.919991	B(ii)			333.701	72.0813	forward	2.98482e+06	4.00046e+06	2.65038e+06	3.78465e+06	4.77044e+06	6.69368e+06	5.95492e+06	4.45122e+06	3.51568e+06	2.85138e+06	2.11056e+06	3.11435e+06	2.31717e+06	7.05324e+06	5.56318e+06	2.67816e+06	1.78024e+06	1.76632e+06	4.29713e+06	2.15865e+06	3.52381e+06	5.15948e+06	5.30864e+06	2.38954e+06	2.10936e+06	2.05308e+06	3.35389e+06	1.71946e+06	3.22126e+06	2.23496e+06	4.09271e+06	3.9002e+06	5.50991e+06	3.90116e+06	3.96601e+06	3.12431e+06	3.36162e+06
5-Hydroxy-L-tryptophan	0.91988	B(ii)			50.0327	221.092	forward	1.92758e+06	2.03391e+06	2.35456e+06	3.2701e+06	3.3795e+06	4.89852e+06	5.28962e+06	4.14014e+06	2.36168e+06	1.88838e+06	2.30478e+06	1.11575e+06	2.13163e+06	4.27179e+06	4.56148e+06	2.20574e+06	2.19576e+06	2.97258e+06	3.0605e+06	2.15035e+06	2.48907e+06	3.164e+06	3.75636e+06	2.19662e+06	1.33818e+06	2.88262e+06	2.59929e+06	2.20107e+06	1.6897e+06	1.42653e+06	3.69788e+06	5.68042e+06	2.65536e+06	2.7816e+06	2.80286e+06	2.70241e+06	3.31559e+06
Homoarecoline	0.918241	B(ii)			605.175	170.118	forward	3.80727e+06	3.5352e+06	3.65789e+06	3.64372e+06	3.4552e+06	3.73211e+06	3.49369e+06	3.83415e+06	3.6434e+06	3.59744e+06	3.5917e+06	1.96693e+06	4.09535e+06	5.7846e+06	3.12433e+06	3.08792e+06	3.77027e+06	3.73791e+06	3.66582e+06	3.72639e+06	3.65554e+06	3.23409e+06	3.13345e+06	4.05667e+06	2.98949e+06	3.46792e+06	3.69321e+06	3.51517e+06	3.48051e+06	3.49142e+06	3.59216e+06	3.3149e+06	3.2256e+06	2.94619e+06	3.67374e+06	3.36747e+06	2.58093e+06
Glycerophosphocholine	0.918125	B(ii)			410.313	258.11	forward	3.9837e+08	1.93243e+09	8.60906e+08	8.28809e+08	2.08469e+09	2.12397e+09	2.47939e+09	7.59626e+08	2.64461e+09	5.2397e+08	4.28932e+08	1.70658e+09	1.10855e+09	1.5964e+09	2.20337e+09	1.59437e+09	1.01567e+09	8.90146e+08	1.72975e+09	1.56079e+09	2.79289e+09	9.84549e+08	1.80518e+09	1.50879e+09	8.00433e+08	1.05883e+09	9.85023e+08	2.21112e+09	1.76445e+09	2.26155e+09	8.38762e+08	6.10456e+08	1.42579e+09	1.50711e+09	1.49906e+09	1.58929e+09	1.53882e+09
N-Acetyl-L-tyrosine	0.917729	B(ii)			16.1481	222.077	forward	4.14824e+06	2.32379e+06	2.77175e+06	2.4738e+06	2.40333e+06	2.36067e+06	2.81315e+06	2.04573e+06	2.31534e+06	2.74091e+06	3.03519e+06	2.38425e+06	2.14732e+06	2.8616e+06	2.92457e+06	2.80279e+06	2.82088e+06	2.62801e+06	2.50334e+06	3.73413e+06	2.5264e+06	2.7464e+06	2.65239e+06	2.50681e+06	2.69101e+06	2.17857e+06	2.67285e+06	2.94125e+06	1.98469e+06	2.81764e+06	2.94752e+06	3.29917e+06	2.66497e+06	2.77241e+06	2.79331e+06	2.49163e+06	2.40943e+06
Cyanuric acid	0.917612	B(ii)			46.6571	127.998	forward	5.2348e+07	1.14323e+07	1.87424e+07	4.34433e+07	1.92941e+07	2.27551e+07	2.25872e+07	2.85859e+07	7.7783e+06	1.95829e+07	5.35484e+07	4.58238e+07	3.21111e+07	5.14758e+07	2.76325e+07	2.69436e+07	5.29337e+06	9.47773e+06	1.31927e+06	6.08718e+06	3.85464e+07	1.96627e+07	2.12163e+07	4.75765e+06	2.35584e+06	4.12104e+07	3.21856e+07	3.58189e+07	2.74773e+07	3.66803e+07	2.71491e+07	6.11545e+07	2.21366e+07	1.88031e+07	1.54737e+07	1.39665e+07	1.10759e+07
Alantolactone	0.916973	B(ii)			261.226	231.135	forward	3.06857e+06	898602	4.38059e+06	6.78448e+06	2.27109e+06	2.06842e+06	767836	805260	692886	4.28478e+06	1.60298e+06	2.96024e+06	2.12427e+06	6.92548e+06	1.22061e+06	3.72218e+06	1.51559e+06	1.5241e+06	2.4846e+06	1.53556e+06	4.10511e+06	2.98895e+06	1.1967e+06	3.0742e+06	1.93068e+06	5.05548e+06	1.05248e+06	2.87006e+06	1.5979e+06	2.9482e+06	4.1572e+06	1.40526e+06	3.15452e+06	3.0166e+06	2.75151e+06	2.68746e+06	2.53938e+06
Indolelactic acid	0.916832	B(ii)			154.897	204.066	forward	857989	833528	667022	772045	813722	1.07831e+06	913862	783979	339830	600060	364247	509858	434564	815960	905327	490135	768039	714616	1.16383e+06	388902	441073	662370	919458	258528	600880	463235	602151	675318	476469	427081	656689	1.02648e+06	642289	678231	667220	680086	696732
Ricinoleic acid	0.915796	B(ii)			45.7611	297.244	forward	9.35503e+06	3.29084e+07	9.54519e+06	1.13368e+07	1.09981e+07	4.13268e+07	1.8021e+07	1.63504e+07	4.59589e+07	8.00883e+06	2.32242e+07	1.04964e+07	1.52793e+07	1.71412e+07	1.59464e+07	1.35475e+07	3.31456e+07	1.05958e+07	2.52875e+07	1.44473e+07	2.79458e+07	2.0089e+07	1.73407e+07	1.00009e+07	2.18391e+08	2.41492e+07	3.58782e+07	1.11111e+07	2.527e+07	5.61204e+07	1.7283e+07	3.02748e+07	2.74541e+07	2.77179e+07	2.73983e+07	2.91595e+07	2.76291e+07
But-2-enoic acid	0.91377	B(ii)			158.165	85.0285	forward	3.23379e+06	3.06971e+06	3.19628e+06	3.52917e+06	2.79142e+06	3.19318e+06	2.38637e+06	3.35223e+06	2.66551e+06	2.97669e+06	2.56054e+06	2.80338e+06	2.99553e+06	3.44121e+06	3.06781e+06	4.08181e+06	2.98927e+06	3.46464e+06	4.73829e+06	2.63193e+06	3.76826e+06	2.48733e+06	2.98881e+06	3.7112e+06	3.19718e+06	3.36847e+06	2.72264e+06	3.37657e+06	2.6123e+06	2.61499e+06	3.12955e+06	3.71512e+06	3.17282e+06	2.75661e+06	3.01582e+06	3.27876e+06	3.27354e+06
Diethyl L-malate	0.912644	B(ii)			214.114	191.093	forward	5.59091e+07	2.58984e+07	3.50668e+07	4.20789e+07	4.78764e+07	4.59639e+07	1.5714e+07	3.39686e+07	2.72528e+07	4.81798e+07	4.64814e+07	3.06625e+07	3.49795e+07	2.53518e+07	4.66597e+07	4.29363e+07	5.65956e+07	2.66132e+07	3.65146e+07	4.89473e+07	3.12013e+07	4.17678e+07	2.7797e+07	3.81577e+07	1.47259e+07	5.13209e+07	4.06852e+07	3.17333e+07	2.59709e+07	3.86067e+07	3.79261e+07	6.03614e+07	2.61444e+07	4.29086e+07	1.5811e+07	2.67311e+07	2.77368e+07
5,7-Dihydroxy-3-methoxyflavone	0.911543	B(ii)			321.463	285.083	forward	1.70377e+06	979955	2.51352e+06	2.09004e+06	980969	2.5938e+06	2.10365e+06	860536	465624	2.10018e+06	1.84219e+06	2.5434e+06	1.1808e+06	1.84354e+06	1.17567e+06	1.46401e+06	1.81217e+06	1.50513e+06	1.8485e+06	1.58376e+06	1.45757e+06	1.70835e+06	2.00431e+06	1.48389e+06	1.11188e+06	1.68111e+06	961017	691910	1.27984e+06	1.71336e+06	1.66591e+06	1.46323e+06	1.6526e+06	1.51287e+06	1.47047e+06	1.80979e+06	1.79417e+06
Ribitol	0.911254	B(ii)			97.2338	151.06	forward	1.29106e+07	1.45815e+07	1.59466e+07	1.86865e+07	1.82425e+07	2.36824e+07	1.65416e+07	2.07992e+07	1.59415e+07	1.35504e+07	1.36657e+07	1.2355e+07	1.37565e+07	2.48191e+07	1.60339e+07	1.85034e+07	1.57573e+07	1.09676e+07	1.35921e+07	1.40756e+07	1.96465e+07	2.17625e+07	2.36606e+07	1.60529e+07	2.44276e+07	1.6538e+07	1.45885e+07	1.73339e+07	1.67997e+07	1.70242e+07	1.50348e+07	2.3398e+07	1.77475e+07	1.78585e+07	1.75249e+07	1.83073e+07	1.75545e+07
Tyrosol 4-sulfate	0.910472	B(ii)			319.96	219.027	forward	1.20211e+07	1.42438e+07	1.32392e+07	1.44319e+07	1.45936e+07	1.60027e+07	8.30177e+06	1.31671e+07	1.16968e+07	1.01997e+07	1.12907e+07	1.66502e+07	1.44167e+07	1.45577e+07	1.31165e+07	1.70678e+07	1.39207e+07	1.4659e+07	1.436e+07	1.54431e+07	1.30002e+07	8.28038e+06	1.30915e+07	1.33963e+07	9.79183e+06	1.31546e+07	1.23366e+07	1.33106e+07	1.14106e+07	1.295e+07	1.26591e+07	7.64947e+06	1.15141e+07	1.17246e+07	1.43171e+07	1.47426e+07	1.44393e+07
Dimethyl fumarate	0.910417	B(ii)			329.029	145.05	forward	2.12595e+07	2.23775e+07	2.01396e+07	2.17414e+07	1.97967e+07	1.67921e+07	2.07951e+07	1.49261e+07	1.91302e+07	2.02598e+07	2.03308e+07	2.26968e+07	1.95817e+07	1.99793e+07	1.81232e+07	2.02915e+07	1.59994e+07	1.8277e+07	1.9446e+07	1.94108e+07	2.21147e+07	1.80574e+07	1.81749e+07	1.9421e+07	1.76578e+07	2.0277e+07	1.9702e+07	2.15879e+07	2.04729e+07	1.98334e+07	1.79832e+07	1.9224e+07	1.92669e+07	2.05546e+07	1.87129e+07	2.16542e+07	2.11251e+07
Glycitein	0.90871	B(ii)			322.194	323.039	forward	2.14324e+06	2.28411e+06	3.52353e+06	3.00377e+06	2.80799e+06	3.62778e+06	2.47255e+06	1.60678e+06	2.01475e+06	2.32297e+06	2.8421e+06	4.36833e+06	1.99746e+06	3.45849e+06	2.24042e+06	2.1082e+06	3.43634e+06	2.60587e+06	2.70446e+06	2.99048e+06	2.64833e+06	1.66663e+06	2.95928e+06	2.57108e+06	755694	2.81733e+06	2.17909e+06	1.99919e+06	2.50324e+06	2.01737e+06	3.4574e+06	1.51572e+06	2.76296e+06	2.68394e+06	2.68414e+06	3.34753e+06	3.03737e+06
L-Allothreonine	0.907875	B(ii)			376.612	118.05	forward	2.8181e+06	1.52052e+07	6.12969e+06	1.31218e+07	7.01684e+06	6.40574e+06	9.06987e+06	8.00666e+06	1.09463e+07	6.54021e+06	5.88376e+06	6.3065e+06	8.29429e+06	1.33321e+07	1.38947e+07	8.75291e+06	4.17216e+06	2.34398e+07	6.72632e+06	7.9659e+06	1.11337e+07	3.58349e+06	5.95949e+06	4.147e+06	4.35883e+06	6.0659e+06	2.60346e+07	1.22757e+07	1.01899e+07	1.78502e+07	4.11988e+06	5.36183e+06	8.29931e+06	1.02498e+07	9.88709e+06	1.20576e+07	1.1516e+07
Methyl beta-naphthyl ketone	0.906631	B(ii)			308.592	171.077	forward	5.55358e+06	2.19707e+07	1.4519e+07	1.41498e+07	5.77847e+07	1.70673e+07	8.03187e+07	6.92513e+06	7.92026e+06	2.11361e+07	9.05991e+06	9.87114e+06	1.29724e+07	7.09914e+06	2.87405e+07	3.37329e+07	2.31883e+07	7.95588e+07	3.67857e+07	2.75591e+07	4.93213e+07	1.31295e+07	1.35329e+07	3.65774e+07	2.62834e+07	1.52965e+07	6.97702e+07	5.08785e+07	3.57204e+07	5.69113e+07	2.99339e+07	6.26499e+07	2.48935e+07	2.85778e+07	2.65167e+07	3.43661e+07	3.04533e+07
Brassilexin	0.905671	B(ii)			67.2456	175.033	forward	7.43261e+06	2.92597e+06	7.02068e+06	6.5763e+06	4.33942e+06	997989	2.74234e+06	6.41276e+06	1.75429e+06	3.32556e+06	6.38054e+06	6.83754e+06	6.91319e+06	4.47464e+06	4.66981e+06	5.97827e+06	6.83769e+06	6.24679e+06	7.34471e+06	6.78825e+06	5.78897e+06	6.29752e+06	2.03314e+06	6.75291e+06	3.36805e+06	5.8918e+06	6.26047e+06	5.89085e+06	6.12547e+06	6.52346e+06	6.15578e+06	1.32561e+06	5.29181e+06	5.25219e+06	5.14103e+06	5.03738e+06	5.1892e+06
Ethyl stearate	0.903611	B(ii)			36.2996	311.296	forward	8.60278e+06	3.10543e+07	1.21164e+07	1.4827e+07	1.77812e+07	2.69558e+07	3.1987e+07	2.10893e+07	5.35213e+07	6.4251e+06	6.06183e+06	1.02966e+07	2.22502e+07	1.30133e+07	1.63323e+07	2.33517e+07	2.1299e+07	7.20648e+06	2.06496e+07	1.37456e+07	7.03958e+06	2.24639e+07	3.43667e+07	1.21149e+07	7.5587e+07	8.34699e+06	2.41305e+07	8.3065e+06	1.77548e+07	3.65958e+07	1.59139e+07	1.87257e+07	2.33749e+07	2.69541e+07	2.5727e+07	2.37154e+07	2.8062e+07
Asymmetric dimethylarginine	0.902577	B(ii)			562.134	203.15	forward	3.26682e+07	4.90031e+07	4.37514e+07	3.25979e+07	1.74144e+07	1.92234e+07	1.72847e+07	2.36884e+07	4.91738e+07	4.06827e+07	5.67249e+07	6.81645e+07	3.357e+07	4.75477e+07	1.62019e+07	2.80061e+07	3.77436e+07	3.61566e+07	2.1157e+07	6.31767e+07	3.85693e+07	4.27076e+07	4.24436e+07	2.15721e+07	2.23818e+07	8.94369e+07	3.56173e+07	3.83741e+07	4.43169e+07	3.3418e+07	3.73021e+07	2.89283e+07	3.81593e+07	4.32303e+07	4.25178e+07	4.7206e+07	4.48327e+07
Dihydro-3-methyl-2(3H)-furanone	0.901885	B(ii)			409.08	101.06	forward	6.75086e+06	8.27355e+06	5.54469e+06	9.12397e+06	5.86727e+06	6.51689e+06	6.9089e+06	5.36992e+06	6.76569e+06	8.85229e+06	7.76854e+06	8.24072e+06	5.57027e+06	6.65635e+06	8.07044e+06	6.41056e+06	4.18449e+06	7.22233e+06	7.12642e+06	7.16036e+06	7.09098e+06	9.3907e+06	7.77445e+06	6.19314e+06	9.88292e+06	6.73312e+06	9.83028e+06	6.93123e+06	5.48689e+06	6.57365e+06	6.33363e+06	7.92575e+06	7.11372e+06	6.88019e+06	7.70552e+06	7.96896e+06	7.55425e+06
3-Pyridinebutanoic acid	0.90168	B(ii)			235.984	166.086	forward	1.24637e+06	1.83934e+06	1.54883e+06	2.15682e+06	1.9396e+06	1.74855e+06	1.90857e+06	1.45689e+06	1.72229e+06	1.38703e+06	1.99342e+06	2.16386e+06	1.76578e+06	2.23807e+06	1.59153e+06	2.04473e+06	1.82632e+06	1.64333e+06	1.71983e+06	2.12184e+06	1.67118e+06	1.51005e+06	1.61508e+06	1.73776e+06	1.35195e+06	1.66492e+06	1.00011e+06	1.9233e+06	1.37758e+06	1.73638e+06	1.74034e+06	1.3767e+06	1.36778e+06	1.36105e+06	1.55277e+06	1.42685e+06	1.69713e+06
Pivaloylcarnitine	0.901456	B(ii)			262.928	246.17	forward	1.56967e+07	4.68879e+07	5.52044e+07	2.51751e+07	1.07215e+08	1.77805e+08	2.78974e+08	1.62302e+08	6.49684e+07	5.62412e+07	2.76129e+07	1.13146e+07	3.76189e+07	4.04179e+07	2.29441e+08	5.36766e+07	3.63012e+07	6.96448e+07	9.56622e+07	4.49589e+07	4.63719e+07	8.13798e+07	5.53392e+07	4.42496e+07	5.26313e+07	7.3604e+07	6.4142e+07	4.72375e+07	6.82507e+07	1.55043e+08	3.82125e+08	4.18778e+08	1.05398e+08	1.02822e+08	1.02617e+08	1.02192e+08	1.08039e+08
O-Demethylforbexanthone	0.899308	B(ii)			431.276	327.08	forward	70265.4	144585	93003.4	112742	202001	107201	117860	132046	146966	121534	139899	142008	108512	264635	259372	133124	63341.9	79255.2	70981.2	111600	287448	64726.9	124297	135732	69261.8	146929	75942	215812	78170	136845	38187.9	90693.8	111120	144555	188844	144392	176758
2-Phospho-D-glyceric acid	0.896233	B(ii)			469.089	184.985	forward	2.07579e+07	2.2856e+07	1.81086e+07	1.93539e+07	2.20993e+07	2.87944e+07	1.86854e+07	6.73297e+07	1.10461e+07	1.76597e+07	2.24909e+07	2.51079e+07	2.86833e+07	6.84918e+07	3.12411e+07	2.3367e+07	2.64992e+07	3.02283e+07	6.27583e+07	3.40137e+07	2.24961e+07	2.05399e+07	2.37878e+07	1.65691e+07	8.44237e+06	1.55301e+07	3.14436e+07	2.00808e+07	1.80208e+07	2.34002e+07	2.32045e+07	2.46103e+07	2.18457e+07	2.40575e+07	2.42363e+07	2.48828e+07	2.51204e+07
2-Oxo-4-methylthiobutanoic acid	0.895817	B(ii)			36.2004	149.024	forward	1.94946e+06	1.64435e+07	9.19864e+06	3.27606e+06	6.08424e+06	5.96815e+07	2.17165e+06	3.44393e+06	2.73568e+06	845846	1.72442e+06	1.89337e+06	6.93719e+06	1.23925e+06	2.56989e+06	994286	5.4931e+07	1.00431e+06	5.42095e+06	1.56965e+07	2.07039e+06	1.36795e+07	1.60989e+07	304765	3.75933e+07	1.2735e+06	2.40068e+07	147014	7.97886e+07	5.49052e+07	4.91355e+07	728349	1.36542e+07	1.18285e+07	1.674e+07	1.57218e+07	8.7175e+06
2-Methyl-5-(2-propenyl)pyrazine	0.895589	B(ii)			241.239	135.092	forward	2.26216e+06	2.21284e+06	2.46084e+06	1.85439e+06	4.9323e+06	4.96521e+06	4.17827e+06	4.40575e+06	1.69062e+06	1.73832e+06	1.82335e+06	2.21964e+06	2.27285e+06	2.52974e+06	4.55251e+06	1.76438e+06	2.60526e+06	2.86484e+06	2.92465e+06	1.80866e+06	2.19849e+06	2.77935e+06	2.42459e+06	2.47912e+06	3.03158e+06	3.66863e+06	2.1456e+06	1.75074e+06	2.02992e+06	1.74313e+06	6.00755e+06	6.0725e+06	2.60351e+06	2.66958e+06	2.49114e+06	2.3366e+06	2.11333e+06
Hexanoylglycine	0.894785	B(ii)			356.632	174.113	forward	1.0701e+06	1.27489e+06	1.26122e+06	2.05335e+06	1.15996e+06	975577	1.17212e+06	1.09369e+06	1.6919e+06	1.44366e+06	1.25473e+06	2.79439e+06	1.05948e+06	1.47987e+06	1.57056e+06	995211	1.24975e+06	788098	1.06205e+06	1.5584e+06	1.24286e+06	1.18041e+06	1.67984e+06	1.33589e+06	1.20349e+06	1.38194e+06	898201	1.28798e+06	1.28626e+06	1.02206e+06	1.0591e+06	1.30579e+06	1.24104e+06	1.22876e+06	1.23107e+06	1.21753e+06	1.33699e+06
2-Hydroxymyristic acid	0.894701	B(ii)			57.0681	243.196	forward	2.71326e+06	2.2789e+06	3.25476e+06	4.9505e+06	4.03809e+06	9.40811e+06	4.74493e+06	4.22971e+06	4.61474e+06	3.27905e+06	3.09127e+06	5.58201e+06	4.34773e+06	7.18458e+06	3.88031e+06	5.66122e+06	4.04945e+06	2.90592e+06	4.57576e+06	5.10179e+06	2.72163e+06	4.4407e+06	3.95753e+06	3.48215e+06	1.26724e+07	2.90752e+06	3.62004e+06	3.65733e+06	3.44917e+06	5.17794e+06	3.94353e+06	5.54745e+06	3.75599e+06	3.83005e+06	3.90857e+06	3.90554e+06	6.22006e+06
Azelaic acid	0.894655	B(ii)			343.259	187.097	forward	8.49154e+06	1.63363e+07	8.15307e+06	1.08199e+07	9.04723e+06	1.81462e+07	1.1199e+07	9.73369e+06	1.14622e+07	7.34938e+06	6.96244e+06	1.10972e+07	1.0866e+07	1.15462e+07	9.79813e+06	1.02018e+07	1.40386e+07	8.69468e+06	1.14381e+07	9.96207e+06	7.08033e+06	1.0202e+07	1.39431e+07	8.25428e+06	7.27735e+07	9.18246e+06	1.26184e+07	8.73612e+06	1.16782e+07	1.7339e+07	1.23757e+07	6.44851e+06	1.39196e+07	1.35705e+07	1.46477e+07	1.46824e+07	1.50482e+07
2-(3,4-Dihydroxybenzoyloxy)-4,6-dihydroxybenzoate	0.89421	B(ii)			232.171	307.044	forward	3.10704e+07	5.04064e+07	6.58983e+07	7.0073e+07	5.70919e+07	4.55731e+07	7.1446e+07	3.84535e+07	4.88049e+07	6.1185e+07	5.79282e+07	4.97386e+07	5.05957e+07	5.28679e+07	4.19692e+07	4.53177e+07	5.66581e+07	6.29468e+07	4.3445e+07	5.08332e+07	5.7057e+07	4.55774e+07	5.29806e+07	7.01701e+07	6.64527e+07	7.56473e+07	4.35883e+07	6.6062e+07	4.36884e+07	5.22282e+07	3.38161e+07	2.47575e+07	5.18107e+07	5.79945e+07	5.67049e+07	6.0889e+07	5.73977e+07
Paucine	0.892304	B(ii)			322.193	251.136	forward	701720	1.04045e+06	1.33068e+06	909505	931469	1.46703e+06	2.00887e+06	1.01325e+06	1.24963e+06	1.54484e+06	1.04175e+06	1.37938e+06	882150	972546	1.09298e+06	907370	1.14446e+06	1.20918e+06	1.60546e+06	951614	1.03453e+06	1.34038e+06	1.2443e+06	866125	702686	1.06831e+06	1.28976e+06	1.0778e+06	1.20737e+06	1.27102e+06	1.14787e+06	1.32144e+06	1.35563e+06	1.29461e+06	1.04645e+06	1.24539e+06	1.0441e+06
Acetaminophen	0.891646	B(ii)			458.646	152.071	forward	5.0354e+06	4.11243e+06	6.99188e+06	1.2116e+07	3.68256e+06	6.46396e+06	7.31602e+06	1.1267e+07	1.34757e+07	1.05132e+07	2.32414e+06	3.04694e+06	8.13253e+06	7.28102e+06	7.5845e+06	6.42563e+06	8.69636e+06	3.3587e+06	1.27233e+07	8.01525e+06	5.35128e+06	1.46525e+07	1.32803e+07	4.53408e+06	1.01195e+07	1.09542e+07	1.51811e+07	8.00421e+06	1.97229e+06	7.34641e+06	3.00774e+06	8.7707e+06	2.88321e+06	1.59518e+07	2.82041e+06	1.11546e+07	1.09097e+07
Valyl-Leucine	0.890929	B(ii)			211.637	231.17	forward	7.72839e+06	2.62908e+06	8.36118e+06	1.4769e+07	5.40683e+06	5.0302e+06	3.63651e+06	2.23497e+06	2.2815e+06	1.00617e+07	5.01436e+06	6.36527e+06	5.99756e+06	1.63996e+07	3.2812e+06	9.24214e+06	4.72652e+06	4.96248e+06	5.02103e+06	4.44943e+06	1.53669e+07	5.93857e+06	3.76721e+06	6.9961e+06	5.13788e+06	1.30018e+07	3.46942e+06	1.05132e+07	4.65972e+06	7.5167e+06	9.26194e+06	3.4421e+06	4.99708e+06	6.64435e+06	6.79953e+06	7.44767e+06	7.11757e+06
gamma-Glutamylleucine	0.888784	B(ii)			362.438	261.145	forward	277072	158001	435899	534780	277119	327461	242650	176730	125924	337131	165181	295540	300599	580335	285352	251214	208647	186155	262455	209572	495670	289862	217691	352077	234922	476479	209315	393285	247414	338156	307879	269860	333693	327977	280306	283665	321170
3-Isopropenylpentanedioic acid	0.88876	B(ii)			280.199	173.081	forward	2.64199e+06	2.63558e+06	3.49776e+06	4.33321e+06	4.45649e+06	3.79888e+06	6.67549e+06	2.31901e+06	2.49606e+06	2.95801e+06	2.80703e+06	2.45459e+06	4.30462e+06	5.13379e+06	2.73308e+06	3.70621e+06	2.59704e+06	4.69223e+06	3.18512e+06	2.65925e+06	5.59752e+06	3.4489e+06	3.56046e+06	4.32873e+06	4.39686e+06	3.48306e+06	2.86027e+06	7.53596e+06	5.05082e+06	4.06335e+06	3.71012e+06	4.39054e+06	3.38971e+06	3.54747e+06	4.66136e+06	4.30801e+06	4.49526e+06
Pentanenitrile	0.888511	B(ii)			428.305	84.0814	forward	1.56031e+06	1.32716e+06	2.63804e+06	2.45025e+06	1.21045e+06	2.44552e+06	2.1039e+06	932619	2.85036e+06	2.72426e+06	2.28056e+06	5.977e+06	2.82262e+06	3.72236e+06	364941	281287	965302	729351	1.50212e+06	2.56436e+06	1.71658e+06	2.45461e+06	1.16677e+06	1.59061e+06	2.28153e+06	2.43535e+06	1.24835e+06	1.65263e+06	3.93011e+06	1.77817e+06	2.63189e+06	2.33908e+06	4.07514e+06	2.53915e+06	3.79911e+06	2.18621e+06	1.7614e+06
3,5,6-Trihydroxy-5-(hydroxymethyl)-2-methoxy-2-cyclohexen-1-one	0.888469	B(ii)			309.849	205.068	forward	2.20961e+06	2.19311e+06	1.92366e+06	2.78499e+06	2.34107e+06	1.68414e+06	1.96502e+06	720315	1.29548e+06	1.55474e+06	1.83517e+06	2.59164e+06	1.89346e+06	5.26833e+06	980770	1.92414e+06	1.20417e+06	826436	1.20698e+06	2.61569e+06	2.96925e+06	1.45384e+06	3.09182e+06	1.42896e+06	3.59979e+06	1.48012e+06	1.46223e+06	2.6631e+06	2.32242e+06	3.55917e+06	989941	1.04822e+06	1.79641e+06	2.32537e+06	2.56365e+06	2.66554e+06	2.69591e+06
D-Ribose	0.887014	B(ii)			93.7922	149.045	forward	3.07906e+07	1.78037e+07	3.27484e+07	2.97132e+07	2.73811e+07	2.62138e+07	2.19162e+07	2.96956e+07	2.79907e+07	2.30185e+07	7.9087e+07	3.49252e+07	2.96613e+07	2.48706e+07	2.18035e+07	5.21353e+07	7.59385e+07	2.22192e+07	3.08713e+07	3.57573e+07	2.25481e+07	2.79324e+07	2.49324e+07	3.00088e+07	2.30495e+07	2.64799e+07	2.2227e+07	2.51533e+07	2.06442e+07	7.77553e+07	2.27967e+07	3.74621e+07	2.34207e+07	2.31664e+07	2.20875e+07	2.40364e+07	2.42631e+07
1-Methylhistidine	0.886748	B(ii)			312.024	170.092	forward	1.35145e+07	1.16428e+07	1.86313e+07	1.87999e+07	1.69543e+07	1.77265e+07	8.43416e+06	1.52924e+07	1.2261e+07	2.99009e+07	1.96557e+07	1.79048e+07	1.12752e+07	1.09773e+07	1.31523e+07	1.63281e+07	1.56048e+07	1.85357e+07	1.34874e+07	1.81987e+07	9.65931e+06	1.2366e+07	1.14047e+07	7.24726e+06	1.05946e+07	1.48256e+07	1.59679e+07	1.43736e+07	1.18162e+07	2.58852e+07	2.50731e+07	1.14247e+07	2.15132e+07	1.30824e+07	1.29939e+07	1.40102e+07	1.40961e+07
3-Hydroxycapric acid	0.885409	B(ii)			94.8884	187.133	forward	4.04506e+06	1.10148e+07	1.10954e+07	1.7072e+07	7.74601e+06	1.12626e+07	1.71782e+07	1.09509e+07	7.73458e+06	7.9982e+06	6.20121e+06	1.22267e+07	6.14885e+06	1.25655e+07	1.38944e+07	1.02673e+07	1.00878e+07	1.06092e+07	4.93678e+06	1.2736e+07	6.59528e+06	1.01018e+07	8.14636e+06	7.62057e+06	2.2375e+07	7.00721e+06	4.13566e+06	1.33373e+07	8.17126e+06	9.2823e+06	7.41177e+06	7.4679e+06	8.46704e+06	9.28486e+06	9.39494e+06	8.24555e+06	8.26029e+06
Bikojic acid	0.884945	B(ii)			153.109	283.05	forward	791856	1.28736e+06	757924	832694	1.54254e+06	1.14369e+06	1.10231e+06	760940	953182	1.30547e+06	1.02779e+06	816893	1.12572e+06	843757	1.00846e+06	798080	872131	1.18368e+06	512898	1.30293e+06	1.43652e+06	1.06167e+06	1.02498e+06	947526	1.79115e+06	856575	1.38836e+06	1.50015e+06	1.05852e+06	1.90426e+06	1.02703e+06	948640	1.22303e+06	1.37002e+06	1.65846e+06	1.64588e+06	1.44403e+06
Norcapsaicin	0.884815	B(ii)			60.9091	292.191	forward	436531	486244	425533	429484	412313	453286	265235	479990	486879	430684	441337	390215	434814	393730	446314	503884	486797	420516	464345	426679	464092	336370	483838	500212	284785	467502	463661	444616	344771	510026	470861	516855	411881	451988	314527	364336	329378
Lanthionine ketimine	0.881035	B(ii)			251.569	190.009	forward	1.79174e+06	1.67086e+06	1.14142e+06	1.67965e+06	803548	2.73174e+06	2.13763e+06	254013	1.73055e+06	1.70854e+06	2.95479e+06	2.22026e+06	1.46158e+06	2.66252e+06	2.14954e+06	1.6298e+06	616095	2.24525e+06	31161.2	1.94413e+06	1.77559e+06	1.83764e+06	1.50029e+06	916191	668061	1.23878e+06	2.27886e+06	1.94037e+06	3.07511e+06	1.98273e+06	556124	542805	1.33447e+06	1.59923e+06	1.38767e+06	1.35849e+06	1.42989e+06
4-(2-Furanylmethylene)-3,4-dihydro-2H-pyrrole	0.880487	B(ii)			24.9107	148.076	forward	3.02964e+06	5.78226e+06	4.62674e+06	3.79634e+06	2.35889e+06	902828	2.00745e+06	1.37288e+06	6.95307e+06	4.91597e+06	3.44512e+06	1.00492e+07	9.20686e+06	613897	1.72715e+06	1.05049e+06	3.19877e+06	3.47381e+06	1.33361e+06	2.43228e+06	7.7557e+06	2.89345e+06	4.1481e+06	6.8616e+06	5.26989e+06	2.76025e+06	4.56053e+06	1.05462e+07	2.01124e+06	3.94458e+06	1.24211e+06	605758	3.48113e+06	3.78697e+06	4.00683e+06	4.09085e+06	4.14925e+06
(10E,12Z)-9-HODE	0.878913	B(ii)			220.279	295.228	forward	436589	854756	632758	521199	492042	1.27867e+06	840411	883052	399590	408756	388642	328545	406617	500203	862481	355453	597501	371847	953507	375283	379284	976096	747317	502998	467520	335108	689272	236286	398999	945374	495398	713287	630720	584151	463727	692097	423187
N-Acetyl-L-methionine	0.877835	B(ii)			205.404	190.054	forward	2.54361e+06	2.62302e+06	1.85543e+06	5.54993e+06	4.63275e+06	3.32197e+06	2.47682e+06	1.94931e+06	2.91123e+06	2.71657e+06	2.28538e+06	2.54156e+06	4.39744e+06	4.75252e+06	2.14103e+06	3.24672e+06	2.06582e+06	2.22752e+06	2.31805e+06	3.00447e+06	5.46322e+06	3.19743e+06	3.25366e+06	2.75819e+06	4.3817e+06	2.81623e+06	3.51513e+06	3.44662e+06	3.06086e+06	4.6055e+06	2.55797e+06	2.66673e+06	3.32581e+06	3.26991e+06	3.34759e+06	3.47536e+06	3.32143e+06
7-Methylguanine	0.876669	B(ii)			200.638	164.057	forward	2.16224e+06	2.40505e+06	2.32485e+06	2.41954e+06	3.14338e+06	3.39368e+06	1.88935e+06	2.4039e+06	2.00283e+06	1.6704e+06	1.71689e+06	2.73071e+06	2.23863e+06	2.23632e+06	2.39337e+06	2.55303e+06	1.93514e+06	2.33292e+06	1.71501e+06	1.88898e+06	1.80932e+06	2.37424e+06	2.27682e+06	2.05291e+06	1.80539e+06	2.07459e+06	2.60632e+06	1.68549e+06	2.10038e+06	2.4776e+06	1.88348e+06	2.89768e+06	2.32959e+06	2.35591e+06	2.66794e+06	2.58369e+06	2.62064e+06
PS(16:0/16:0)	0.875726	B(ii)			93.8474	734.514	forward	361895	848993	409549	280566	3.23912e+06	606963	4.42395e+06	172444	2.36819e+06	3.54744e+06	2.92847e+06	2.55313e+06	2.7536e+06	2.12079e+06	5.94271e+06	1.40452e+06	258616	618020	166131	922102	417800	528091	327780	328840	3.95703e+06	8.02761e+06	1.87296e+06	3.55306e+06	3.92299e+06	5.06961e+06	4.74842e+06	187628	3.22513e+06	2.26251e+06	2.58899e+06	2.28544e+06	2.53565e+06
Arsenobetaine	0.874915	B(ii)			299.486	179.005	forward	6.83564e+06	1.1176e+07	1.18185e+07	8.2565e+06	3.26087e+07	1.04822e+07	2.61662e+07	8.07653e+06	1.14999e+07	1.05393e+07	8.54739e+06	2.84209e+07	7.31409e+06	3.10959e+06	1.60032e+07	1.46881e+07	5.53533e+06	2.18277e+07	1.20311e+07	3.29571e+07	2.84213e+07	1.45585e+07	1.52383e+07	9.97916e+06	1.29243e+07	2.73961e+07	2.81676e+07	2.93819e+07	2.16846e+07	2.93294e+07	2.75974e+07	3.85821e+07	1.85563e+07	1.90814e+07	1.99471e+07	1.98681e+07	1.86614e+07
Sucrose	0.873315	B(ii)			384.639	341.109	forward	1.04579e+06	4.32344e+06	1.63563e+06	2.86291e+06	7.411e+07	6.87624e+06	1.29921e+06	2.33783e+06	3.53924e+06	3.1377e+06	2.67148e+06	2.09813e+06	5.31231e+06	3.09594e+06	3.37481e+06	6.25978e+06	2.43769e+06	1.98201e+06	5.3335e+06	2.06817e+06	2.5488e+06	4.66626e+06	4.80309e+06	3.65557e+06	2.2657e+07	1.52146e+06	6.18528e+06	5.62205e+06	2.61573e+06	1.30952e+07	2.12084e+06	1.78216e+06	7.03408e+06	6.23273e+06	6.97025e+06	7.31462e+06	7.54375e+06
S-Adenosylmethionine	0.872884	B(ii)			563.192	399.145	forward	653548	519169	452588	1.03531e+06	1.21881e+06	1.03107e+06	620022	532634	405543	895249	1.10692e+06	482907	1.17209e+06	176628	591684	1.21776e+06	996164	1.21066e+06	710883	732949	1.24811e+06	935011	939087	601284	659970	658949	1.05061e+06	1.58463e+06	1.83885e+06	928521	905130	595554	1.0053e+06	1.13183e+06	1.17e+06	1.27631e+06	1.17516e+06
Citicoline	0.870597	B(ii)			451.553	489.115	forward	705697	656107	684239	927859	1.0659e+06	535231	923910	519546	597394	843866	806513	714357	749002	1.09312e+06	710543	1.36214e+06	605957	870741	578011	436849	1.29367e+06	689320	1.02156e+06	667222	458008	974941	782651	1.15291e+06	926390	1.13241e+06	450023	570373	794391	946259	889150	973900	1.03005e+06
3-Dehydroxycarnitine	0.869747	B(ii)			402.113	146.117	forward	4.18531e+09	4.72683e+09	4.26851e+09	4.17428e+09	3.92253e+09	3.78091e+09	4.31379e+09	4.46097e+09	3.87973e+09	4.53621e+09	4.64261e+09	4.00872e+09	3.34802e+09	3.78831e+09	5.07241e+09	4.01897e+09	4.26626e+09	3.99371e+09	4.58226e+09	3.53255e+09	4.50429e+09	4.47598e+09	4.05053e+09	4.04444e+09	3.50298e+09	3.8985e+09	3.53156e+09	3.79862e+09	3.81708e+09	3.04079e+09	3.9997e+09	4.63298e+09	4.08742e+09	4.20544e+09	4.16746e+09	4.20101e+09	4.35815e+09
Shinflavanone	0.868806	B(ii)			343.588	391.198	forward	0	0	0	0	1.1058e+06	0	0	0	0	0	0	0	0	0	0	0	0	0	0	0	0	0	0	0	0	0	0	0	26179.7	1.82297e+07	0	0	343477	493726	293924	464735	496046
4-Pyridoxic acid	0.867741	B(ii)			154.128	184.064	forward	9.80942e+06	2.36297e+07	1.74472e+07	1.34639e+07	1.28804e+07	1.17193e+07	2.04276e+07	1.06017e+07	1.85339e+07	1.32496e+07	9.83418e+06	1.8295e+07	8.30555e+06	7.82229e+06	2.39325e+07	1.48394e+07	1.20586e+07	8.24574e+06	9.20859e+06	1.1067e+07	2.14502e+07	1.67835e+07	1.64023e+07	9.01452e+06	4.22914e+07	1.6733e+07	9.45521e+06	1.57136e+07	1.44319e+07	1.59411e+07	1.51794e+07	1.84194e+07	1.69482e+07	2.15937e+07	1.80186e+07	1.8775e+07	1.9672e+07
Pyrrole-2-carboxylic acid	0.867641	B(ii)			358.444	110.024	forward	2.02877e+06	2.63849e+06	2.43102e+06	2.97917e+06	2.39411e+06	2.14007e+06	1.74065e+06	2.38022e+06	2.57826e+06	2.35805e+06	2.38283e+06	2.56865e+06	2.48761e+06	2.51385e+06	2.3066e+06	2.74543e+06	2.3942e+06	1.06465e+06	2.24829e+06	2.49072e+06	2.684e+06	2.51848e+06	1.76031e+06	2.49711e+06	2.6756e+06	2.36202e+06	2.56301e+06	2.47364e+06	2.343e+06	2.41483e+06	4.80999e+06	2.15252e+06	1.35556e+06	4.72651e+06	2.4089e+06	1.83573e+06	1.86767e+06
3-(3,4-Dihydroxy-5-methoxy)-2-propenoic acid	0.867219	B(ii)			106.349	209.045	forward	6.48251e+06	7.26887e+07	5.33704e+07	1.12742e+07	7.71559e+06	1.97973e+08	1.09278e+07	1.84185e+07	1.61104e+07	1.26285e+06	4.18764e+06	4.8762e+06	2.72231e+07	1.93428e+06	2.9744e+06	3.89459e+06	3.87414e+08	4.21764e+06	2.4528e+07	6.32925e+07	5.55385e+06	4.21533e+07	1.00698e+08	186874	6.50586e+08	4.70183e+06	9.16149e+07	184993	2.57591e+08	1.11538e+08	2.26625e+08	1.77377e+06	7.76622e+07	2.96882e+07	7.83351e+07	5.54961e+07	7.98209e+07
3alpha,4,7,7alpha-Tetrahydro-1H-isoindole-1,3(2H)-dione	0.866818	B(ii)			253.317	152.071	forward	8.26639e+06	8.44024e+06	7.71905e+06	8.64662e+06	8.9176e+06	8.11711e+06	8.30621e+06	7.81428e+06	8.39991e+06	8.19846e+06	8.46591e+06	8.23822e+06	8.48175e+06	8.5628e+06	8.06292e+06	7.83284e+06	7.44571e+06	4.67608e+06	8.48184e+06	8.52703e+06	7.09057e+06	8.16178e+06	8.71859e+06	8.44553e+06	7.79019e+06	9.14697e+06	8.92792e+06	8.73798e+06	8.74984e+06	8.50452e+06	8.39027e+06	7.41536e+06	6.35927e+06	8.16747e+06	7.32515e+06	8.66357e+06	8.30548e+06
Hippuric acid	0.865567	B(ii)			198.623	178.05	forward	1.44082e+07	5.1014e+07	1.4393e+07	1.61644e+07	8.95857e+06	3.00734e+07	9.88439e+06	1.08009e+07	3.40436e+07	1.47135e+07	1.35711e+07	3.05086e+07	3.11587e+07	1.45077e+07	1.17836e+07	9.1478e+06	3.77736e+07	2.22919e+07	1.99386e+07	2.68691e+07	3.64696e+07	1.57885e+07	1.4306e+07	1.54717e+07	6.20872e+07	1.54359e+07	4.53305e+07	4.02817e+07	3.67517e+07	3.80567e+07	1.23602e+07	6.92292e+06	2.61331e+07	2.33129e+07	2.3594e+07	2.70546e+07	2.6877e+07
Methylsuccinic acid	0.86251	B(ii)			397.078	131.034	forward	4.749e+06	5.85428e+06	4.5219e+06	6.07914e+06	6.32782e+06	4.23879e+06	5.74782e+06	4.85104e+06	6.09804e+06	5.81043e+06	4.54959e+06	5.62365e+06	4.9572e+06	5.63143e+06	5.04424e+06	5.40815e+06	5.48027e+06	4.2028e+06	6.45733e+06	5.92734e+06	5.32424e+06	5.49608e+06	4.81272e+06	5.45548e+06	6.16652e+06	5.40656e+06	6.67537e+06	5.01433e+06	5.02443e+06	6.69861e+06	6.53771e+06	5.45336e+06	5.64639e+06	5.35334e+06	6.08687e+06	5.67052e+06	5.6348e+06
L-Palmitoylcarnitine	0.860265	B(ii)			200.463	400.342	forward	1.76962e+08	2.37527e+08	2.65835e+08	4.00835e+08	4.93509e+08	3.92962e+08	1.17661e+09	5.22383e+08	3.12137e+08	3.16955e+08	280718559	9.62383e+07	5.84548e+08	5.94329e+08	6.80404e+08	3.77171e+08	1.54617e+08	6.49766e+07	2.67614e+08	2.49933e+08	4.12674e+08	3.72792e+08	3.49845e+08	3.19639e+08	2.71775e+08	2.98117e+08	3.58621e+08	2.40796e+08	3.28413e+08	2.37476e+08	2.49753e+08	2.83249e+08	3.57818e+08	3.88259e+08	3.88791e+08	3.9982e+08	4.01163e+08
Valyl-Serine	0.85812	B(ii)			302.899	205.119	forward	777916	319615	1.05381e+06	1.64735e+06	736025	837103	533639	229368	254494	1.36288e+06	642050	922500	662983	1.57533e+06	563898	1.074e+06	568596	527925	670155	532740	1.57084e+06	841425	424175	876510	789024	1.16704e+06	555155	1.30764e+06	779095	1.24794e+06	865140	637517	756269	953497	857588	783094	815168
Acetone cyanohydrin	0.856958	B(ii)			99.1822	86.0606	forward	1.63048e+08	1.25075e+08	1.18225e+08	2.12094e+08	7.37131e+07	7.52464e+07	7.77527e+07	9.40911e+07	1.09102e+08	1.08436e+08	1.55907e+08	2.76798e+08	1.14392e+08	1.36509e+08	4.6203e+07	1.82337e+08	7.85497e+07	1.00835e+08	7.28963e+07	1.42793e+08	1.63221e+08	1.35177e+08	1.12247e+08	1.16194e+08	1.18048e+08	1.39156e+08	1.31207e+08	1.31813e+08	7.77971e+07	1.33855e+08	4.85027e+07	1.09283e+08	1.27591e+08	1.16197e+08	1.08976e+08	5.17071e+07	1.05876e+08
Deoxycytidine	0.855521	B(ii)			277.311	226.089	forward	566202	1.10236e+06	1.31806e+06	602066	1.227e+06	873211	2.0686e+06	652119	741966	1.15339e+06	663730	3.2093e+06	628336	534571	661391	883862	411232	514964	472940	1.14211e+06	704345	610141	711715	649710	862973	1.16689e+06	1.68225e+06	689312	1.74785e+06	864002	857811	1.49804e+06	1.12283e+06	1.31272e+06	789879	868678	849231
Indoleacetaldehyde	0.854711	B(ii)			33.8119	158.06	forward	3.85204e+07	4.11248e+07	4.39166e+07	5.16644e+07	5.42526e+07	6.85846e+07	6.44444e+07	6.46119e+07	3.73331e+07	3.41484e+07	4.91432e+07	3.30315e+07	3.38644e+07	6.06687e+07	6.6581e+07	4.76694e+07	3.37287e+07	5.03729e+07	4.37401e+07	3.49572e+07	3.80318e+07	4.14183e+07	5.64786e+07	5.02553e+07	1.02765e+07	4.2538e+07	5.12913e+07	4.48602e+07	3.16651e+07	2.73365e+07	6.82141e+07	7.91637e+07	4.58277e+07	5.45116e+07	4.84011e+07	5.04465e+07	5.36933e+07
Bisabolene oxide	0.854449	B(ii)			31.7114	221.19	forward	1.12112e+06	4.08142e+06	1.12984e+06	2.59572e+06	2.31503e+06	3.07591e+06	821439	1.22317e+06	1.47001e+06	6.99883e+06	1.16281e+06	7.21425e+06	4.17595e+06	1.90367e+06	4.12583e+06	1.11967e+06	1.09554e+07	2.76309e+06	3.70517e+06	1.42079e+07	1.70832e+07	2.11584e+06	3.52134e+06	5.21844e+06	812251	2.39374e+06	1.75926e+06	1.40302e+06	1.18363e+06	1.84706e+06	2.99488e+06	5.06204e+06	3.6067e+06	3.72227e+06	3.506e+06	3.5727e+06	3.38081e+06
Hydrogen phosphate	0.852613	B(ii)			150.98	96.9688	forward	1.10287e+07	1.33919e+07	1.15304e+07	1.46207e+07	1.40286e+07	1.14223e+07	1.34674e+07	1.13578e+07	1.36454e+07	1.179e+07	1.33623e+07	1.1856e+07	1.45711e+07	1.36061e+07	8.34565e+06	1.39776e+07	1.16094e+07	1.22062e+07	1.32046e+07	1.19222e+07	1.33909e+07	1.25263e+07	1.2928e+07	1.05664e+07	6.29349e+06	1.35988e+07	1.3599e+07	9.17843e+06	9.27425e+06	1.31551e+07	1.26032e+07	1.33957e+07	1.25694e+07	1.08233e+07	1.21504e+07	8.68027e+06	1.40716e+07
Deoxyuridine	0.852565	B(ii)			104.019	227.067	forward	1.18204e+07	2.04705e+07	1.17089e+07	1.74513e+07	2.21234e+07	1.47818e+07	1.65087e+07	1.51015e+07	1.46681e+07	1.73201e+07	1.24033e+07	2.24563e+07	1.33162e+07	1.10847e+07	2.26286e+07	9.99025e+06	1.50937e+07	9.33408e+06	1.42177e+07	2.32698e+07	1.29772e+07	1.94732e+07	1.04183e+07	1.24494e+07	1.41765e+07	8.87803e+06	1.39729e+07	1.04282e+07	1.76187e+07	2.15417e+07	1.28007e+07	2.39854e+07	1.45315e+07	1.50917e+07	1.43855e+07	1.39225e+07	1.45403e+07
Glandulone B	0.852122	B(ii)			390.733	245.115	forward	461991	573429	545199	676803	655622	711449	334221	650353	500284	273184	490560	541736	612280	792266	651087	454099	570346	537990	581465	590609	529881	512128	538151	552050	573752	410574	908638	749363	490728	611306	488914	593841	638184	460478	665453	563152	652619
2-Aminoquinoline	0.846954	B(ii)			59.1881	145.076	forward	2.78767e+06	3.32531e+06	2.87871e+06	4.68356e+06	5.47417e+06	1.01485e+07	6.26787e+06	6.86e+06	2.72006e+06	0	2.89877e+06	739137	999558	5.09111e+06	9.29883e+06	1.73117e+06	2.70394e+06	3.60842e+06	5.5833e+06	3.42894e+06	2.38998e+06	1.89507e+06	5.78851e+06	4.43903e+06	0	3.48689e+06	3.45777e+06	2.11296e+06	1.53084e+06	0	6.53678e+06	9.84443e+06	934807	3.4861e+06	2.85013e+06	2.49887e+06	3.94396e+06
Prostaglandin B1	0.846513	B(ii)			57.028	335.223	forward	41445.2	210032	0	53345.4	920596	1.86904e+06	1.70959e+06	606211	345824	120265	152325	87127	353664	186584	944768	66085.6	166901	0	847386	67290.4	95394	461034	349055	583594	1.36365e+06	145594	751099	1.30676e+06	436383	896775	1.13119e+06	252693	512931	541535	557577	478219	315940
Aminoadipic acid	0.845986	B(ii)			415.39	160.061	forward	3.22338e+06	4.2653e+06	4.57893e+06	5.10115e+06	4.98475e+06	8.20514e+06	8.31601e+06	8.2237e+06	1.07918e+07	5.05005e+06	5.2459e+06	1.15432e+07	1.36221e+07	1.3185e+07	5.64193e+06	2.31119e+06	2.79063e+06	2.07873e+06	3.53783e+06	8.32594e+06	3.26489e+06	5.63337e+06	9.71365e+06	3.41995e+06	3.33439e+06	7.82362e+06	5.71033e+06	4.79644e+06	8.09697e+06	4.21771e+06	5.64261e+06	5.70251e+06	6.42209e+06	6.77214e+06	6.48943e+06	6.82759e+06	7.05622e+06
N-Acetylornithine	0.845515	B(ii)			380.56	175.108	forward	5.06306e+06	7.37741e+06	6.11826e+06	8.33742e+06	4.40121e+06	4.97014e+06	6.74712e+06	4.1011e+06	6.36616e+06	5.01412e+06	8.62624e+06	9.03658e+06	3.46499e+06	4.78442e+06	2.6488e+06	5.94467e+06	5.66513e+06	6.31909e+06	3.44403e+06	8.09411e+06	9.07735e+06	3.37291e+06	4.14963e+06	8.79679e+06	5.13849e+06	5.72553e+06	7.1692e+06	9.0145e+06	7.67136e+06	4.00926e+06	3.91257e+06	4.14461e+06	6.09322e+06	6.22492e+06	6.50503e+06	7.28038e+06	7.14547e+06
ADP	0.844977	B(ii)			463.655	426.022	forward	2.74582e+06	1.88744e+06	1.19414e+06	3.9128e+06	1.57318e+06	1.01533e+06	1.20902e+06	3.99455e+06	1.08006e+06	2.77811e+06	2.66027e+06	5.24632e+06	2.75452e+06	1.50669e+06	3.16647e+06	3.1243e+06	867529	3.47703e+06	937665	949466	1.41823e+06	991272	2.80185e+06	3.28615e+06	416828	1.2306e+06	1.86323e+06	1.79709e+06	1.5605e+06	1.79257e+06	1.52232e+06	1.00665e+06	1.47331e+06	2.89855e+06	1.70871e+06	1.00263e+06	1.46012e+06
3-Aminobutanoic acid	0.84492	B(ii)			47.7431	104.071	forward	5.20945e+06	5.42147e+06	4.54592e+06	4.94275e+06	4.62485e+06	4.11149e+06	4.89947e+06	5.8738e+06	5.7377e+06	4.94897e+06	5.40083e+06	4.32913e+06	4.9148e+06	5.37957e+06	5.18863e+06	5.80613e+06	4.2745e+06	5.41669e+06	5.07731e+06	6.17415e+06	7.60858e+06	4.63918e+06	5.64764e+06	5.31149e+06	5.47284e+06	5.66894e+06	5.30478e+06	5.59698e+06	5.15597e+06	4.86765e+06	4.48298e+06	4.93718e+06	5.02336e+06	873295	5.56176e+06	5.57341e+06	5.81619e+06
gamma-Glutamylglutamic acid	0.844406	B(ii)			577.288	277.102	forward	459746	527759	587794	451247	532544	482831	407456	545604	436964	501156	409772	391681	423929	437446	471061	448126	525921	427686	491287	427405	447197	527715	519309	542953	495904	528438	474880	436895	433169	461597	485660	491712	490616	436657	521713	438510	427917
Uridine diphosphate-N-acetylglucosamine	0.841889	B(ii)			425.724	606.076	forward	450906	530263	433560	621387	649983	309650	472004	573400	520832	489670	415905	214429	461862	971803	711698	574418	347891	338441	317040	372391	810904	467230	500873	443609	252459	576028	460213	392492	439632	464510	234958	335839	531254	538312	573485	711662	623382
Isoamyl salicylate	0.840199	B(ii)			436.887	209.115	forward	286875	1.63826e+06	1.45543e+06	1.36104e+06	1.20815e+06	1.46656e+06	952557	1.62933e+06	983452	863341	790144	303955	1.07513e+06	1.16594e+06	1.65055e+06	1.08115e+06	1.60362e+06	952919	2.27778e+06	1.30645e+06	1.6505e+06	1.13823e+06	1.34568e+06	1.73237e+06	817933	1.21275e+06	1.69196e+06	1.42673e+06	1.3008e+06	882125	950686	279603	1.01737e+06	1.45427e+06	1.05157e+06	1.60749e+06	1.57211e+06
Imidazole-4-acetaldehyde	0.839141	B(ii)			155.351	111.056	forward	3.47696e+07	4.66647e+07	5.52318e+07	3.09612e+07	6.6864e+07	4.78768e+07	2.69445e+07	4.16465e+07	3.17326e+07	3.69312e+07	4.5182e+07	4.51297e+07	2.90234e+07	3.98636e+07	4.9019e+07	3.36012e+07	5.0077e+07	4.06092e+07	3.85412e+07	4.35161e+07	4.13824e+07	3.89964e+07	4.10724e+07	3.73838e+07	3.88054e+07	5.56758e+07	3.89553e+07	4.46073e+07	3.7584e+07	3.79457e+07	6.20063e+07	4.24601e+07	5.66094e+07	6.12144e+07	5.19268e+07	4.69018e+07	4.70755e+07
3beta,6beta-Dihydroxynortropane	0.838751	B(ii)			327.993	144.102	forward	3.36092e+07	3.62224e+07	3.73765e+07	3.72846e+07	3.46638e+07	2.83409e+07	3.38523e+07	2.7565e+07	3.23897e+07	3.44571e+07	3.43928e+07	4.33536e+07	3.13174e+07	3.27553e+07	3.06306e+07	3.49163e+07	2.82229e+07	3.34167e+07	3.38182e+07	3.36322e+07	3.67254e+07	3.2104e+07	3.14147e+07	3.31361e+07	2.957e+07	3.57614e+07	3.57665e+07	3.87666e+07	3.6252e+07	3.38293e+07	3.07376e+07	3.36613e+07	3.48944e+07	3.4063e+07	3.57925e+07	3.46622e+07	3.59243e+07
(2R)-2-Hydroxy-2-methylbutanenitrile	0.83812	B(ii)			32.83	100.076	forward	1.13314e+06	1.59231e+06	1.42931e+06	2.02015e+06	1.77214e+06	1.41623e+06	1.92611e+06	1.19253e+06	1.23987e+06	1.39991e+06	1.07798e+06	1.39083e+06	2.11062e+06	1.2282e+06	1.3967e+06	1.26351e+06	2.93445e+06	1.26218e+06	1.23636e+06	1.25343e+06	1.35029e+06	1.11553e+06	1.44072e+06	1.48125e+06	3.5085e+06	1.13949e+06	1.34917e+06	1.62882e+06	1.01709e+06	1.37122e+07	1.39677e+06	1.15246e+06	2.87348e+06	1.66155e+06	2.68771e+06	1.71986e+06	1.40461e+06
D-Xylitol	0.837779	B(ii)			251.67	151.06	forward	3.27217e+06	4.15457e+06	3.86001e+06	3.5266e+06	2.85518e+06	3.17626e+06	4.11475e+06	2.78452e+06	2.84735e+06	2.93553e+06	2.8068e+06	3.86542e+06	3.75197e+06	4.14238e+06	2.63719e+06	2.88441e+06	2.99427e+06	3.62987e+06	3.68218e+06	2.76835e+06	5.28007e+06	3.68769e+06	3.06502e+06	2.8325e+06	5.16753e+06	4.27689e+06	3.95072e+06	3.55078e+06	5.39725e+06	4.31728e+06	3.30851e+06	2.33632e+06	3.8169e+06	3.97693e+06	3.87502e+06	3.7496e+06	3.81304e+06
Leucyl-Hydroxyproline	0.83476	B(ii)			323.359	245.149	forward	9.80477e+07	1.24395e+08	8.84559e+07	8.23059e+07	1.04225e+08	1.04822e+08	2.45754e+08	8.98435e+07	1.28778e+08	1.59804e+08	1.23516e+08	1.60292e+07	8.44256e+07	7.59663e+07	9.16402e+07	4.3842e+07	5.37472e+07	1.47698e+08	5.34899e+07	1.13628e+08	7.70447e+07	1.04122e+08	6.69848e+07	9.60821e+07	8.53581e+07	1.51296e+08	2.20097e+08	1.89015e+08	1.85517e+08	8.75258e+07	6.97768e+07	8.22381e+07	1.03623e+08	1.10761e+08	1.12161e+08	1.165e+08	1.1104e+08
Bovinic acid	0.833145	B(ii)			171.247	279.233	forward	1.97852e+06	2.46513e+06	2.18158e+06	1.85263e+06	1.51685e+06	2.38942e+06	3.60607e+06	1.91929e+06	1.52846e+06	1.59083e+06	1.6762e+06	1.63094e+06	1.4827e+06	1.35599e+06	1.7265e+06	1.88546e+06	2.21614e+06	2.31672e+06	2.43429e+06	2.17134e+06	1.9183e+06	2.17337e+06	2.27202e+06	2.11855e+06	3.43458e+06	1.62739e+06	1.45738e+06	1.56086e+06	1.34808e+06	1.92419e+06	1.80378e+06	2.27068e+06	2.03942e+06	1.91599e+06	1.98677e+06	637964	1.89342e+06
N-cis-Feruloyltyramine	0.831545	B(ii)			231.87	314.146	forward	287825	194228	693115	502940	201780	202209	770807	78936.7	182276	1.09839e+06	469817	434201	257816	265085	146527	176801	345039	354103	207471	231990	263782	919080	271781	461288	927029	682312	137472	444573	409460	535504	0	928905	5.07131e+06	486456	192805	243244	239169
Pyro-L-glutaminyl-L-glutamine	0.830095	B(ii)			185.531	258.108	forward	3.2864e+06	1.88389e+06	2.44728e+06	2.74617e+06	3.85645e+06	4.58434e+06	3.06876e+06	3.42869e+06	2.9447e+06	2.46808e+06	2.03586e+06	3.13211e+06	3.20813e+06	3.9081e+06	3.61217e+06	3.42611e+06	2.40532e+06	2.40794e+06	2.45224e+06	3.09257e+06	4.20643e+06	4.02273e+06	3.70697e+06	2.2904e+06	2.19165e+06	1.97896e+06	2.32153e+06	4.09761e+06	2.55587e+06	4.07185e+06	2.5795e+06	2.998e+06	2.8349e+06	3.12187e+06	3.0369e+06	3.33112e+06	3.16008e+06
(Â±)-erythro-Isoleucine	0.826926	B(ii)			280.7	132.102	forward	4.84028e+07	4.94466e+07	1.75813e+08	1.80836e+08	4.85105e+07	4.62463e+07	3.78129e+08	1.98434e+08	5.30606e+07	4.75625e+07	5.2269e+07	6.85884e+07	1.79018e+08	2.58809e+08	6.00788e+07	1.63263e+08	1.14904e+08	1.62718e+08	1.20564e+08	1.81751e+08	2.14426e+08	1.51395e+08	6.95553e+07	1.49301e+08	2.65768e+07	5.87674e+07	3.8352e+07	2.24e+08	2.06663e+08	3.81126e+07	5.46247e+07	6.44114e+07	1.90593e+08	2.18779e+08	5.00898e+07	2.1966e+08	2.22412e+08
Valyl-Arginine	0.826662	B(ii)			562.237	274.188	forward	1.10032e+07	4.79953e+06	1.21201e+07	1.24547e+07	3.58362e+06	9.21558e+06	2.23884e+06	1.51699e+07	8.72073e+06	6.82647e+06	9.72639e+06	1.22239e+07	4.26314e+06	1.17509e+07	6.11876e+06	5.31256e+06	7.98957e+06	3.34975e+06	5.12167e+06	6.37056e+06	5.45554e+06	5.22554e+06	4.29741e+06	2.82409e+06	1.64692e+06	8.96101e+06	1.81029e+06	2.89962e+06	2.77629e+06	2.36755e+06	5.44559e+06	3.59729e+06	4.95192e+06	7.05058e+06	6.47051e+06	6.85271e+06	7.42608e+06
Caffeine	0.82513	B(ii)			276.731	195.088	forward	2.42327e+07	2.84888e+07	2.96709e+07	2.12962e+07	3.01047e+07	2.26969e+07	2.36431e+07	2.5022e+07	2.52934e+07	2.95203e+07	2.14647e+07	2.55431e+07	2.53695e+07	2.20128e+07	2.04244e+07	2.71688e+07	2.702e+07	2.42438e+07	2.59111e+07	2.64375e+07	2.48983e+07	2.2468e+07	2.61984e+07	2.62911e+07	2.96986e+07	3.1165e+07	2.94222e+07	2.54158e+07	2.88441e+07	2.53795e+07	2.77918e+07	2.65091e+07	2.00012e+07	2.54102e+07	2.36099e+07	2.40519e+07	2.86694e+07
Benzoyl glucuronide (Benzoic acid)	0.824568	B(ii)			342.793	299.073	forward	524492	547925	579940	247995	334521	260755	306715	379139	394324	303657	323614	285676	188150	392172	441599	241530	427437	572086	427762	640368	441730	345406	340827	322730	234422	321360	460398	53415.3	282292	350109	287623	412847	425141	472053	391056	292690	376298
6-O-Acetylaustroinulin	0.824212	B(ii)			198.078	365.268	forward	1.85983e+06	2.33735e+06	2.13909e+06	2.51318e+06	1.32314e+06	2.61374e+06	2.02549e+06	1.31755e+06	519850	772927	487122	1.06416e+06	910907	1.44406e+06	883958	1.61628e+06	1.40048e+06	1.358e+06	3.57167e+06	2.22648e+06	1.92037e+06	1.74992e+06	1.76265e+06	1.78518e+06	495359	972056	1.35247e+06	918156	358073	814875	860322	1.34998e+06	4.7238e+06	4.33399e+06	4.10755e+06	4.48549e+06	4.46744e+06
Theaspirone A	0.819877	B(ii)			319.377	209.154	forward	1.77288e+06	2.84312e+06	3.24467e+06	3.23283e+06	2.82556e+06	3.60127e+06	3.23258e+06	2.94545e+06	1.88137e+06	3.63942e+06	3.39875e+06	5.71216e+06	1.02325e+06	3.28395e+06	3.07226e+06	3.30331e+06	4.68836e+06	3.49934e+06	3.375e+06	4.77783e+06	2.80142e+06	3.32302e+06	2.85679e+06	2.46061e+06	3.90781e+06	2.70244e+06	2.9113e+06	3.80127e+06	3.10374e+06	3.31891e+06	2.97586e+06	3.95188e+06	2.91857e+06	3.13996e+06	3.13524e+06	3.71104e+06	3.31784e+06
2-Acetyl-3,6-dimethylpyrazine	0.81922	B(ii)			266.443	151.087	forward	1.84424e+06	1.8664e+06	1.79457e+06	1.89027e+06	2.22238e+06	2.3076e+06	2.00512e+06	2.17397e+06	1.62634e+06	1.94255e+06	1.39428e+06	1.60009e+06	1.59087e+06	2.07658e+06	2.53835e+06	1.70353e+06	2.44195e+06	3.0625e+06	1.89916e+06	1.83429e+06	1.75143e+06	1.42128e+06	1.60114e+06	1.81043e+06	1.93602e+06	2.43746e+06	2.03286e+06	2.57165e+06	1.89778e+06	1.37072e+06	1.69143e+06	2.3483e+06	1.75056e+06	1.85723e+06	1.79623e+06	1.92427e+06	2.13243e+06
5-Aminopentanal	0.818654	B(ii)			441.016	102.092	forward	1.93101e+06	2.20291e+06	2.93428e+06	3.61341e+06	2.15657e+06	3.02048e+06	2.96661e+06	1.31588e+06	3.2585e+06	5.74773e+06	2.58238e+06	1.18761e+07	2.96513e+06	6.84946e+06	1.56438e+06	1.63451e+06	1.59048e+06	7.05531e+06	2.9773e+06	3.46387e+06	2.31197e+06	3.24355e+06	2.74467e+06	2.02293e+06	3.08003e+06	1.78623e+07	8.39016e+06	5.56208e+06	4.09128e+06	4.63917e+06	3.59554e+06	2.29791e+06	2.70223e+06	2.6968e+06	2.9257e+06	3.02921e+06	2.89015e+06
N-Nitroso-pyrrolidine	0.81762	B(ii)			355.46	101.071	forward	1.15049e+08	5.21284e+07	1.30808e+08	5.03183e+07	9.26244e+07	1.16702e+08	8.40708e+07	1.0579e+08	3.57416e+07	5.8319e+07	5.5687e+07	8.31461e+07	6.47526e+07	4.32037e+07	1.12139e+08	1.05934e+08	1.19484e+08	9.96439e+07	3.75783e+07	6.61208e+07	6.14343e+07	8.75824e+07	3.49569e+07	4.86966e+07	8.37422e+07	9.03196e+07	5.21523e+07	7.40053e+07	6.97252e+07	4.55905e+07	1.32156e+08	1.65779e+08	7.28946e+07	6.65991e+07	6.77375e+07	6.73972e+07	6.90991e+07
Acetylglycine	0.817104	B(ii)			318.354	116.034	forward	8.20252e+07	8.29735e+07	5.61428e+07	6.54684e+07	4.69918e+07	2.61053e+07	8.24292e+07	2.49905e+07	8.94278e+07	6.93133e+07	9.51413e+07	1.00987e+08	9.16687e+07	6.91808e+07	2.07628e+07	6.62426e+07	5.43362e+07	8.95682e+07	2.71131e+07	1.07555e+08	7.35225e+07	5.07702e+07	3.34498e+07	6.31604e+07	8.79696e+07	7.50397e+07	8.9263e+07	9.23643e+07	1.2597e+08	8.54014e+07	3.02953e+07	2.7987e+07	6.58706e+07	7.02068e+07	6.23138e+07	6.33631e+07	6.349e+07
Isovalerylglutamic acid	0.816884	B(ii)			343.935	232.118	forward	2.49575e+06	1.22432e+06	1.53627e+06	1.08257e+06	1.48956e+06	1.17587e+06	2.02187e+06	1.08286e+06	1.7416e+06	1.37433e+06	1.06381e+06	1.00515e+06	2.32752e+06	1.19951e+06	1.47699e+06	1.23787e+06	1.71402e+06	1.02966e+06	2.38428e+06	1.17412e+06	1.64373e+06	1.35783e+06	1.86595e+06	2.62687e+06	1.48733e+06	1.3626e+06	1.13049e+06	997517	1.18715e+06	1.35847e+06	1.66485e+06	1.10552e+06	1.51668e+06	1.51934e+06	1.23133e+06	1.44683e+06	1.34144e+06
Prostaglandin D2-1-glyceryl ester	0.816061	B(ii)			232.189	427.271	forward	48334	60423.1	24425.6	0	207963	32753.2	119520	0	23904	105121	61533.6	92827.6	185805	357144	136139	142085	0	17700	55227.8	0	0	0	25208.3	58777.8	173208	320925	306085	153168	0	146112	64128.9	0	202604	345249	292380	288270	361116
Beta-D-Galactose	0.814804	B(ii)			314.676	179.055	forward	9.93621e+07	4.10796e+07	5.29933e+07	9.03936e+07	4.35124e+07	5.23133e+07	3.15552e+07	3.25907e+07	3.13598e+07	9.44589e+07	3.90039e+07	5.88156e+07	4.4465e+07	5.09215e+07	3.59291e+07	5.67127e+07	3.81882e+07	8.75937e+07	4.46112e+07	3.92521e+07	3.72812e+07	8.93642e+07	4.49611e+07	4.68372e+07	5.41243e+07	3.72479e+07	4.25961e+07	4.13761e+07	7.872e+07	5.56494e+07	3.74304e+07	3.63074e+07	4.62639e+07	1.35882e+08	9.97275e+07	4.32843e+07	4.5337e+07
3-Hydroxysuberic acid	0.814618	B(ii)			240.179	191.093	forward	3.88082e+06	2.38537e+06	2.65852e+06	4.87828e+06	2.54305e+06	2.99779e+06	1.98024e+06	2.4632e+06	2.69874e+06	5.68745e+06	6.46046e+06	4.66774e+06	2.26328e+06	2.37689e+06	3.63898e+06	4.09224e+06	4.54633e+06	2.83663e+06	2.63037e+06	3.14043e+06	7.5934e+06	2.32636e+06	2.62131e+06	1.72926e+06	2.50112e+06	9.25537e+06	5.04947e+06	3.47863e+06	2.57473e+06	3.04704e+06	3.86396e+06	4.08883e+06	3.75613e+06	6.42856e+06	2.34428e+06	2.56184e+06	2.3448e+06
Theobromine	0.81298	B(ii)			152.87	181.072	forward	755529	2.72285e+06	2.32785e+06	934041	935754	1.32247e+06	637964	2.67845e+06	862450	415804	382303	93579.4	167541	1.19685e+06	3.11678e+06	1.64438e+06	1.92877e+06	766808	1.56329e+06	727671	1.95854e+06	881312	2.96209e+06	1.6665e+06	0	1.93096e+06	525277	694340	549667	178634	1.37295e+06	555214	1.21923e+06	2.10275e+06	2.16134e+06	2.13698e+06	1.0579e+06
Cytarabine	0.811726	B(ii)			412.322	244.095	forward	477958	4.01222e+06	1.55471e+06	1.25793e+06	4.2479e+06	4.57071e+06	5.87017e+06	1.49823e+06	6.63882e+06	978625	675828	3.00443e+06	1.64578e+06	2.6855e+06	4.75395e+06	2.41261e+06	1.78659e+06	1.50359e+06	4.09404e+06	3.12173e+06	6.02351e+06	1.75829e+06	3.76297e+06	2.93908e+06	1.60768e+06	1.92589e+06	1.57945e+06	3.80582e+06	3.34307e+06	4.20318e+06	1.65672e+06	1.29622e+06	2.23166e+06	2.54537e+06	2.78539e+06	2.64611e+06	2.55175e+06
D-Xylulose 1-phosphate	0.811383	B(ii)			453.346	231.027	forward	5.49845e+06	4.89486e+06	3.27382e+06	2.70425e+06	4.36918e+06	2.92467e+06	2.31176e+06	7.00704e+06	6.73434e+06	2.17945e+06	3.03321e+06	3.21896e+06	4.27958e+06	3.46662e+06	7.11618e+06	6.79823e+06	2.69592e+06	5.80903e+06	2.6855e+06	2.82344e+06	3.31866e+06	1.44251e+06	2.88257e+06	2.16416e+06	0	3.00181e+06	3.56664e+06	1.95044e+06	3.27264e+06	3.49151e+06	2.83813e+06	4.18558e+06	5.03453e+06	4.75242e+06	3.3484e+06	3.79806e+06	4.65087e+06
Gluconic acid	0.80882	B(ii)			370.488	195.05	forward	3.79016e+06	3.18994e+06	4.36601e+06	4.57494e+06	3.37734e+06	5.28908e+06	2.77088e+06	3.89854e+06	3.10945e+06	3.2836e+06	3.79076e+06	4.36783e+06	4.51386e+06	3.78199e+06	3.18789e+06	4.49524e+06	3.63313e+06	4.15832e+06	3.24621e+06	4.56363e+06	3.05824e+06	3.2768e+06	3.24237e+06	5.01199e+06	5.74992e+06	3.34721e+06	3.46594e+06	3.29763e+06	3.40825e+06	6.50922e+06	3.72893e+06	4.3744e+06	4.02491e+06	4.31951e+06	4.44898e+06	4.42134e+06	4.99317e+06
1-Formylneogrifolin	0.80668	B(ii)			385.078	357.25	forward	0	654564	736038	1.86118e+06	1.80083e+06	1.66285e+06	1.12256e+06	2.06787e+06	1.47517e+06	1.82687e+06	1.98754e+06	1.08987e+06	1.14934e+06	1.76806e+06	2.24175e+06	1.66852e+06	719306	1.9706e+06	1.57632e+06	824354	1.8696e+06	1.1872e+06	1.94061e+06	898026	928336	1.40749e+06	1.52259e+06	1.88252e+06	1.59873e+06	1.2569e+06	1.19533e+06	0	1.47756e+06	1.14198e+06	1.29212e+06	1.72278e+06	933692
Hydroxyprolyl-Leucine	0.80644	B(ii)			364.776	245.15	forward	8.1542e+07	1.03296e+08	8.04594e+07	6.62816e+07	8.56186e+07	8.96637e+07	2.55478e+08	6.62941e+07	1.09758e+08	1.32585e+08	9.2412e+07	1.47018e+07	7.81303e+07	7.22998e+07	8.20122e+07	3.97649e+07	4.15723e+07	1.27067e+08	4.6725e+07	9.1226e+07	7.24477e+07	9.89943e+07	6.13239e+07	1.02388e+08	6.98922e+07	1.30018e+08	1.88231e+08	1.62711e+08	1.70089e+08	7.84474e+07	5.54002e+07	7.93524e+07	1.01908e+08	1.00805e+08	9.77319e+07	9.89441e+07	1.03475e+08
N-Acetyl-D-Glucosamine 6-Phosphate	0.805773	B(ii)			448.693	300.049	forward	4.83438e+06	700695	1.28373e+06	1.76456e+06	2.57392e+06	2.25043e+06	839322	740378	5.28869e+06	8.82251e+06	4.1082e+06	7.24621e+06	3.50362e+06	4.0492e+06	1.02469e+06	1.8707e+06	1.10868e+06	1.80772e+06	2.72919e+06	2.68496e+06	2.83689e+06	2.74567e+06	3.74186e+06	600736	3.55861e+06	3.46398e+06	1.47031e+06	4.17147e+06	4.34033e+06	4.57352e+06	1.54296e+06	3.12987e+06	2.46492e+06	2.7348e+06	2.94364e+06	3.02503e+06	3.2209e+06
Dibutyl disulfide	0.80476	B(ii)			269.653	179.093	forward	1.37111e+08	1.61326e+08	2.06686e+08	1.18508e+08	1.57051e+08	1.86886e+08	1.31658e+08	1.52899e+08	1.29618e+08	1.69477e+08	1.27392e+08	1.133e+08	1.34948e+08	1.45529e+08	1.84032e+08	1.35865e+08	1.53602e+08	1.2611e+08	1.69099e+08	1.31229e+08	1.51872e+08	1.54155e+08	1.67326e+08	1.4294e+08	1.36982e+08	1.70601e+08	1.45787e+08	1.33328e+08	1.17748e+08	1.55718e+08	1.53652e+08	1.71359e+08	1.32985e+08	1.05685e+08	8.65818e+07	1.31537e+08	1.37192e+08
Phosphoenolpyruvic acid	0.80212	B(ii)			456.132	166.974	forward	3.80582e+06	5.0413e+06	1.57812e+06	1.83849e+06	4.31001e+06	4.62561e+06	3.66795e+06	4.2182e+06	6.52335e+06	1.59113e+06	5.06797e+06	3.85064e+06	5.80652e+06	6.53479e+06	5.18189e+06	4.00956e+06	6.81407e+06	3.98919e+06	4.66256e+06	5.99396e+06	5.13757e+06	3.47576e+06	3.8993e+06	3.20948e+06	5.14521e+06	1.73673e+06	9.09204e+06	3.78705e+06	3.14672e+06	7.99161e+06	4.47641e+06	5.391e+06	5.03107e+06	4.27667e+06	4.59333e+06	5.25234e+06	4.8025e+06
D-Fructose 2,6-bisphosphate	0.802001	B(ii)			583.644	338.989	forward	646452	1.93013e+06	526888	713765	1.49734e+06	1.24382e+06	2.95811e+06	2.42208e+06	3.27958e+06	1.0204e+06	1.21784e+06	649743	1.4202e+06	1.06156e+06	2.92179e+06	1.15336e+06	4.39816e+06	2.26169e+06	1.7469e+06	945872	4.43711e+06	3.26486e+06	2.14144e+06	700129	2.7206e+06	1.12216e+06	1.67839e+06	3.26788e+06	652875	1.10802e+06	2.74689e+06	4.19517e+06	3.21403e+06	1.65918e+06	3.04545e+06	1.55721e+06	3.52103e+06
Methyl methanethiosulfonate	0.798664	B(iii)			284.375	126.991	forward	742467	985411	695225	1.64757e+06	1.06005e+06	1.01597e+06	1.50491e+06	824950	902008	1.23282e+06	1.96032e+06	3.76665e+06	1.9925e+06	1.69791e+06	455132	1.42718e+06	0	1.87554e+06	0	1.17279e+06	1.07411e+06	925934	761072	647404	520751	896098	1.46747e+06	935263	863142	3.13936e+06	690463	504441	1.17942e+06	1.39574e+06	1.26192e+06	1.727e+06	1.10389e+06
Methylimidazole acetaldehyde	0.798019	B(iii)			56.9246	125.071	forward	1.68662e+07	4.96725e+07	1.00109e+07	2.35391e+07	3.11965e+07	2.2576e+07	5.82581e+07	1.97738e+07	3.60805e+07	2.07457e+07	2.57031e+07	2.28725e+07	2.88476e+07	8.80381e+06	5.09992e+07	3.35737e+07	3.66558e+07	2.8332e+07	3.205e+07	2.46386e+07	3.38772e+07	1.73441e+07	3.69187e+07	9.47116e+07	3.89394e+07	2.47927e+07	7.01306e+07	8.78824e+07	1.36284e+08	4.48164e+07	3.30172e+07	3.95139e+07	4.07153e+07	3.49667e+07	3.74148e+07	3.50794e+07	2.24359e+07
1-Methylpyrrolo[1,2-a]pyrazine	0.796729	B(iii)			306.34	133.076	forward	5.46922e+06	5.58529e+06	5.44895e+06	5.97818e+06	5.25362e+06	6.68374e+06	7.15777e+06	5.10122e+06	5.94259e+06	5.45697e+06	5.52955e+06	5.51756e+06	4.16231e+06	4.46101e+06	5.66957e+06	5.84403e+06	5.25085e+06	5.29472e+06	5.55418e+06	6.18327e+06	6.43273e+06	5.10097e+06	5.19797e+06	5.24022e+06	3.05295e+06	3.45109e+06	6.19763e+06	5.25054e+06	5.05258e+06	2.74267e+06	5.63824e+06	3.58208e+06	4.71465e+06	4.24903e+06	5.49009e+06	6.19436e+06	5.1459e+06
Polyoxyethylene dioleate	0.796502	B(iii)			210.546	591.536	forward	44501.2	78222.9	0	0	168304	25709	59611.2	0	257052	56168.5	152918	189873	261021	83580.4	228573	25120.1	0	46442.9	0	58043.4	28161.4	0	0	31064.6	264415	190935	272688	272654	258991	271209	238254	0	64320.5	143013	86646.2	74311.1	77654.2
LysoPE(18:2(9Z,12Z)/0:0)	0.79633	B(iii)			217.488	478.293	forward	1.46548e+06	2.13312e+06	1.30088e+06	1.94608e+06	1.09878e+06	1.75676e+06	1.56635e+06	1.20876e+06	861982	574742	581865	805751	821582	1.07902e+06	761924	901197	1.35708e+06	1.35076e+06	1.59449e+06	1.67509e+06	2.13391e+06	1.46315e+06	1.30795e+06	1.42312e+06	4.24107e+06	789689	923128	1.05759e+06	791250	801910	588794	1.21353e+06	1.52454e+06	1.68967e+06	1.82161e+06	1.80959e+06	1.96122e+06
3-Methyl-2-oxovaleric acid	0.79275	B(iii)			177.154	129.055	forward	1.41852e+07	1.99402e+07	1.52441e+07	1.38196e+07	2.41994e+07	2.45404e+07	2.42833e+07	2.19298e+07	1.38415e+07	1.57499e+07	1.94562e+07	1.77844e+07	1.0064e+07	1.62678e+07	2.00574e+07	1.35001e+07	2.03686e+07	1.80106e+07	1.77317e+07	1.72863e+07	1.11672e+07	1.58982e+07	2.20793e+07	1.45955e+07	1.2425e+07	1.596e+07	1.56126e+07	1.25936e+07	1.80357e+07	1.58744e+07	2.44995e+07	2.27157e+07	1.33047e+07	1.79745e+07	1.35661e+07	1.37032e+07	1.53856e+07
Linoleamide	0.792005	B(iii)			108.596	280.264	forward	1.63465e+06	1.09946e+06	1.49821e+06	1.44548e+06	1.39535e+06	1.43785e+06	2.30734e+06	1.32635e+06	1.56091e+06	1.57857e+06	1.71962e+06	1.26593e+06	1.56042e+06	2.43345e+06	1.27864e+06	1.19172e+06	1.22766e+06	1.00723e+06	1.48298e+06	1.62376e+06	1.93312e+06	1.56589e+06	1.52481e+06	1.84228e+06	2.0734e+06	1.32318e+06	3.21066e+06	1.29007e+06	1.5595e+06	1.46255e+06	1.46109e+06	1.56005e+06	1.40907e+06	1.2682e+06	1.38056e+06	1.22681e+06	1.30838e+06
Deoxyribose 5-phosphate	0.791651	B(iii)			94.9436	213.017	forward	4.79829e+07	3.43339e+07	1.27903e+08	1.20372e+08	8.94514e+07	5.63084e+07	7.00952e+07	3.30964e+07	3.50564e+07	2.81671e+07	3.2444e+07	6.95976e+07	3.75951e+07	5.80184e+07	3.56339e+07	3.38468e+07	4.01211e+07	3.26927e+07	1.34312e+08	5.55866e+07	3.40208e+07	3.85587e+07	3.65719e+07	4.14297e+07	3.1995e+07	3.31136e+07	3.79379e+07	3.18542e+07	3.21206e+07	4.15236e+07	3.32635e+07	6.79569e+07	3.31815e+07	3.0444e+07	3.37721e+07	2.86132e+07	2.97775e+07
Phenol glucuronide	0.791399	B(iii)			342.763	293.065	forward	2.41605e+06	5.19195e+06	4.03767e+06	3.29769e+06	3.35113e+06	2.84605e+06	3.16064e+06	3.61046e+06	4.58341e+06	4.08415e+06	3.46817e+06	3.12701e+06	3.58774e+06	4.012e+06	4.29771e+06	4.77909e+06	3.31008e+06	5.0363e+06	4.93375e+06	5.94912e+06	5.75532e+06	3.15027e+06	4.68823e+06	4.23958e+06	4.24068e+06	3.6317e+06	4.91076e+06	3.16922e+06	3.37645e+06	4.67027e+06	2.12031e+06	2.17536e+06	5.43582e+06	4.70331e+06	4.47284e+06	4.29545e+06	4.17621e+06
dTDP-4-acetamido-4,6-dideoxy-D-galactose	0.789198	B(iii)			439.938	590.121	forward	276860	322572	560420	638496	376873	509344	555280	212559	323376	432498	456139	397123	461499	626203	355965	369653	221443	301735	266746	233730	520014	220386	422706	534138	117959	290056	164349	554415	506471	179825	145528	155303	294153	441140	386106	378179	458602
Valyl-Methionine	0.787721	B(iii)			215.069	249.127	forward	665167	294409	741145	1.40183e+06	418472	609018	334844	298264	285199	808923	484209	676834	435909	1.25918e+06	355376	731434	405740	548634	476490	430411	1.42647e+06	617994	273230	631234	487724	979538	385153	1.02172e+06	464373	582063	806757	329267	408451	592628	657876	632163	657240
Deoxyinosine	0.787131	B(iii)			192.69	251.079	forward	4.63491e+06	4.65924e+06	4.28768e+06	6.70509e+06	9.44152e+06	5.7932e+06	1.12913e+07	3.86496e+06	4.97194e+06	3.92275e+06	3.63107e+06	4.83764e+06	4.03173e+06	4.55812e+06	8.18531e+06	5.94705e+06	5.65891e+06	2.57634e+06	3.9077e+06	6.70074e+06	7.46194e+06	4.34855e+06	4.2242e+06	4.89464e+06	1.17866e+07	3.84047e+06	5.08321e+06	3.49722e+06	1.04499e+07	7.32274e+06	8.17817e+06	6.05137e+06	6.11281e+06	6.23542e+06	6.0505e+06	5.7553e+06	6.03825e+06
Prostaglandin E2	0.786883	B(iii)			706.845	351.221	forward	2.04479e+06	1.22834e+06	2.14326e+06	950621	1.09487e+06	2.12755e+06	1.59524e+06	1.24684e+06	1.37011e+06	1.79357e+06	1.45953e+06	1.91553e+06	1.38831e+06	1.52605e+06	2.08475e+06	3.11151e+06	2.43906e+06	1.47386e+06	1.20248e+06	1.35279e+06	1.68028e+06	5.13007e+06	1.48069e+06	1.45577e+06	1.4028e+06	1.77754e+06	1.28437e+06	1.56101e+06	1.58055e+06	2.11273e+06	1.61353e+06	2.31982e+06	2.50226e+06	1.19935e+06	1.68577e+06	2.34836e+06	1.05724e+06
2,5-Diethyl-3,6-dimethylpyrazine	0.786401	B(iii)			654.165	165.139	forward	1.48706e+06	703745	817016	1.03393e+06	902478	1.93677e+06	775739	2.50228e+06	915757	769427	855157	1.58005e+06	899849	1.04963e+06	1.51518e+06	1.06814e+06	1.61428e+06	1.08851e+06	1.4809e+06	962799	1.23493e+06	1.05975e+06	1.3213e+06	649231	957555	947490	1.12723e+06	645590	1.06881e+06	884824	1.67604e+06	877945	997478	1.11364e+06	821353	594851	925248
O-Phosphoethanolamine	0.781859	B(iii)			508.334	140.011	forward	8.67229e+06	7.60616e+06	7.73719e+06	1.22905e+07	1.52405e+07	9.23015e+06	1.36133e+07	5.19154e+06	1.04797e+07	1.44589e+07	1.15311e+07	9.47995e+06	1.28637e+07	1.58625e+07	1.11799e+07	1.3049e+07	8.42576e+06	6.23013e+06	7.33e+06	1.04102e+07	2.1686e+07	1.14576e+07	9.426e+06	1.06326e+07	2.06519e+07	7.56685e+06	1.50182e+07	1.43462e+07	1.38917e+07	1.84284e+07	5.42591e+06	1.33819e+07	1.34642e+07	1.28391e+07	1.29874e+07	1.27684e+07	1.28389e+07
N-Methylnicotinium	0.781502	B(iii)			607.765	177.139	forward	2.16142e+06	4.26378e+06	1.60226e+06	2.47673e+06	1.33017e+06	1.79528e+06	3.91265e+06	4.8005e+06	1.80099e+06	4.46384e+06	1.99326e+06	1.55126e+06	4.75984e+06	1.47376e+06	4.17627e+06	1.71519e+06	5.3529e+06	4.28317e+06	4.47326e+06	4.61982e+06	3.3209e+06	4.97308e+06	4.49379e+06	1.91312e+06	1.49988e+06	2.05766e+06	4.03841e+06	4.08297e+06	3.76044e+06	2.32751e+06	4.39184e+06	3.86702e+06	4.83412e+06	4.69354e+06	4.19718e+06	3.63879e+06	3.94222e+06
Pi-Methylimidazoleacetic acid	0.780649	B(iii)			177.474	141.066	forward	3.08213e+06	2.78091e+06	3.60667e+06	2.54446e+06	2.96809e+06	4.02015e+06	2.76849e+06	3.1781e+06	2.94938e+06	3.58241e+06	3.0849e+06	2.60753e+06	2.54796e+06	3.2809e+06	3.18897e+06	3.29452e+06	4.21784e+06	3.54125e+06	3.76854e+06	3.61039e+06	3.41311e+06	3.55437e+06	3.42675e+06	3.38129e+06	3.12946e+06	3.07491e+06	3.27552e+06	2.9527e+06	4.23474e+06	2.89904e+06	2.65919e+06	3.0766e+06	3.01496e+06	3.38545e+06	2.91763e+06	3.29946e+06	3.24057e+06
Polyoxyethylene (600) monoricinoleate	0.77922	B(iii)			204.867	341.305	forward	1.71291e+06	2.19735e+06	1.57127e+06	1.78173e+06	2.05275e+06	1.97886e+06	2.10058e+06	2.29235e+06	2.17081e+06	1.64532e+06	2.05975e+06	2.03239e+06	2.12047e+06	1.99716e+06	2.17488e+06	2.02322e+06	2.22385e+06	2.04079e+06	2.07176e+06	1.96374e+06	1.80476e+06	1.9127e+06	2.12225e+06	1.96714e+06	2.98073e+06	1.95451e+06	2.06871e+06	1.84141e+06	1.95065e+06	1.97129e+06	1.94434e+06	2.08507e+06	2.0734e+06	2.0273e+06	1.9499e+06	2.02099e+06	1.55289e+06
3,3',5,5'-Tetrahydroxy-6,7-methyleneoxy-4'-methoxyflavone 3-glucuronide	0.778217	B(iii)			195.748	537.086	forward	101685	260359	153803	641310	396812	388828	46390.5	820133	377732	677484	588795	385937	907147	185615	1.40933e+06	962127	117865	312995	714837	274285	455789	1.21568e+06	753271	1.02522e+06	1.00805e+06	338909	493040	1.11301e+06	317095	632009	79138.3	360993	303020	372002	437296	557375	346414
Alpha-Hydroxyisobutyric acid	0.776515	B(iii)			254.652	103.039	forward	2.18971e+06	2.06593e+06	2.24224e+06	2.16073e+06	3.58689e+06	3.17944e+06	3.71792e+06	2.5643e+06	2.0231e+06	2.36167e+06	1.16175e+06	2.32289e+06	2.15725e+06	2.19412e+06	3.40625e+06	2.23233e+06	2.15733e+06	2.22783e+06	2.30231e+06	2.25226e+06	1.04269e+06	2.50424e+06	1.26391e+06	2.42021e+06	3.89793e+06	2.28349e+06	2.03292e+06	2.42823e+06	2.43023e+06	2.28266e+06	3.27875e+06	3.62476e+06	1.85391e+06	3.09098e+06	3.70611e+06	2.39217e+06	2.33914e+06
1-Methyl 2-galloylgalactarate	0.776417	B(iii)			424.713	377.074	forward	996286	1.00661e+06	1.08948e+06	1.32466e+06	1.04729e+06	993401	1.21276e+06	935160	1.02217e+06	1.12305e+06	1.28039e+06	1.12874e+06	1.02234e+06	1.46166e+06	1.03527e+06	1.17243e+06	782353	793939	842401	981448	1.04287e+06	999517	1.00504e+06	1.19304e+06	605974	1.15193e+06	848306	1.07499e+06	1.01149e+06	906110	774449	946761	977468	1.0706e+06	1.1029e+06	1.17427e+06	1.09805e+06
PC(20:4(5Z,8Z,11Z,14Z)/14:0)	0.775669	B(iii)			169.906	754.537	forward	2.9044e+06	2.85775e+06	3.29938e+06	2.55915e+06	8.07913e+06	5.82347e+06	1.00591e+07	2.23823e+06	6.33613e+06	8.73421e+06	8.83292e+06	1.43954e+07	8.67991e+06	5.60732e+06	1.19848e+07	1.53178e+06	1.84089e+06	4.15296e+06	1.10102e+06	2.93151e+06	1.09748e+06	2.17041e+06	589934	1.91518e+06	1.0257e+07	1.07287e+07	1.06727e+07	9.92692e+06	1.31892e+07	6.88062e+06	1.0546e+07	1.03944e+06	6.46544e+06	6.67061e+06	6.32747e+06	5.8455e+06	6.11979e+06
Arginyl-Alanine	0.774467	B(iii)			561.182	246.156	forward	4.67811e+08	2.28177e+08	9.27989e+08	1.01887e+09	1.50072e+08	3.98939e+08	1.04396e+08	1.13119e+09	8.88424e+08	5.30465e+08	4.11087e+08	6.59076e+08	1.52317e+08	1.04656e+09	1.50425e+08	2.70245e+08	4.14934e+08	2.71631e+08	1.6565e+08	6.71095e+08	2.66288e+08	6.33161e+08	5.05195e+08	9.62526e+07	8.03443e+07	8.28107e+08	1.58922e+08	1.07624e+08	3.01087e+08	1.09838e+08	3.95986e+08	1.19632e+08	3.91077e+08	4.80341e+08	5.05422e+08	5.20056e+08	5.18924e+08
Methionyl-Phenylalanine	0.770276	B(iii)			190.265	297.126	forward	1.73403e+07	781367	1.54075e+07	6.29511e+07	9.01424e+06	3.78726e+06	1.35833e+06	254451	295891	2.08436e+07	4.82247e+06	8.98927e+06	9.25003e+06	5.05813e+07	3.46199e+06	2.05598e+07	3.30616e+06	1.92395e+06	5.66194e+06	3.50614e+06	3.68584e+07	7.79067e+06	1.36812e+06	1.21717e+07	1.51134e+07	3.5037e+07	2.87202e+06	1.61534e+07	4.25239e+06	1.67323e+07	4.37032e+07	1.70259e+06	1.20157e+07	1.20603e+07	1.40259e+07	1.27339e+07	1.2926e+07
3'-Hydroxydaidzein	0.769493	B(iii)			38.8982	269.046	forward	0	3.66272e+06	0	0	71195.9	1.1317e+07	0	485932	6.92635e+06	0	0	0	166194	979619	683466	0	8.3982e+06	0	2.20228e+06	0	364560	2.14848e+06	737424	0	2.00592e+07	0	2.35775e+06	0	2.58316e+06	6.20761e+06	602563	0	1.16424e+06	1.49393e+06	2.58219e+06	2.94773e+06	399000
N-Cyclopropyl-trans-2-cis-6-nonadienamide	0.769319	B(iii)			694.234	194.154	forward	8.36432e+06	9.66719e+06	6.457e+06	9.46058e+06	8.44337e+06	2.0466e+07	1.20376e+07	2.79996e+07	1.13854e+07	7.67176e+06	7.65135e+06	1.06834e+07	9.59242e+06	6.19403e+06	9.48172e+06	8.37126e+06	1.28751e+07	1.07823e+07	1.86055e+07	1.07997e+07	1.77893e+07	7.78781e+06	9.61099e+06	7.39619e+06	8.72203e+06	8.82116e+06	7.58719e+06	8.62034e+06	8.70486e+06	1.41204e+07	8.40187e+06	7.47864e+06	8.21157e+06	1.50718e+07	9.5517e+06	9.57018e+06	1.18489e+07
1,9-Nonanedithiol	0.768921	B(iii)			199.335	193.108	forward	4.69909e+08	1.87954e+08	2.44368e+08	1.84186e+08	2.36162e+08	2.1163e+08	1.20442e+08	2.12425e+08	3.67833e+08	3.73994e+08	3.40459e+08	3.09142e+08	1.8584e+08	1.73171e+08	2.03505e+08	4.07946e+08	4.13638e+08	3.27426e+08	2.26445e+08	2.26813e+08	1.52076e+08	1.66504e+08	2.20639e+08	1.55187e+08	8.45491e+07	2.6442e+08	2.15599e+08	2.90678e+08	1.66049e+08	3.26196e+08	2.44004e+08	2.71609e+08	2.08085e+08	2.00556e+08	1.94599e+08	2.25421e+08	3.39495e+08
Serylisoleucine	0.768303	B(iii)			283.256	219.134	forward	2.55194e+06	1.77611e+06	2.76856e+06	8.63198e+06	2.41577e+06	1.98823e+06	1.44047e+06	1.58659e+06	1.52491e+06	3.71887e+06	2.25559e+06	4.76975e+06	3.28856e+06	5.39098e+06	1.70177e+06	3.52541e+06	1.69502e+06	1.7519e+06	2.14867e+06	2.13266e+06	4.87671e+06	2.56459e+06	1.69244e+06	2.52748e+06	1.59042e+06	3.81452e+06	991558	3.23638e+06	2.06908e+06	2.68786e+06	3.76226e+06	1.7644e+06	2.3943e+06	2.43091e+06	2.66845e+06	2.3338e+06	2.44483e+06
4-Aminobutyraldehyde	0.767726	B(iii)			372.666	88.0874	forward	1.02545e+06	1.09591e+06	1.67901e+06	913873	1.01379e+06	905322	889809	1.56369e+06	931142	1.07669e+06	990294	1.55232e+06	985404	1.53024e+06	596271	1.33828e+06	1.07947e+06	1.33036e+06	955957	1.28478e+06	1.16275e+06	2.22375e+06	975378	1.11225e+06	674436	994155	1.29886e+06	773120	983156	1.34555e+06	891268	1.36196e+06	579960	1.12824e+06	1.45822e+06	840043	1.12656e+06
PC(22:4(7Z,10Z,13Z,16Z)/16:0)	0.767635	B(iii)			192.379	810.601	forward	722201	442398	518397	829467	850723	717388	553735	401264	402327	760437	530312	635032	954270	424110	490227	673559	582567	462584	746503	565058	2.05827e+06	624602	1.31534e+06	928949	1.38157e+06	772154	1.23317e+06	436848	503245	767086	497649	639396	702533	609732	694620	546473	718861
Behenic acid	0.767478	B(iii)			36.4201	339.327	forward	4.55181e+06	1.86312e+07	2.99099e+06	4.09833e+06	4.52893e+06	1.20537e+07	5.14366e+06	1.47895e+07	4.3879e+07	2.75544e+06	2.95888e+06	4.12001e+06	5.70547e+06	8.46565e+06	8.84343e+06	4.53669e+06	8.9678e+06	3.13508e+06	8.80046e+06	5.2898e+06	3.63463e+06	9.43673e+06	2.1182e+07	2.7131e+06	1.4694e+07	4.66706e+06	1.65298e+07	3.36546e+06	1.1313e+07	1.58969e+07	6.35726e+06	5.0333e+06	9.47462e+06	9.71403e+06	8.31565e+06	8.8077e+06	8.95413e+06
Isobutyryl-L-carnitine	0.765994	B(iii)			280.149	232.154	forward	4.62134e+08	4.76454e+08	6.07351e+08	6.91748e+08	8.42057e+08	6.50597e+08	1.03684e+09	4.05889e+08	4.66569e+08	5.64476e+08	5.42351e+08	3.93394e+08	5.16144e+08	7.2224e+08	5.05979e+08	6.34671e+08	3.61007e+08	7.31449e+08	5.62128e+08	5.34961e+08	7.57966e+08	6.23589e+08	6.50476e+08	6.7206e+08	7.76957e+08	5.86788e+08	4.97885e+08	1.07674e+09	9.10729e+08	7.57396e+08	6.86068e+08	7.80386e+08	6.6604e+08	6.7603e+08	6.95432e+08	6.79617e+08	6.92187e+08
Hydroxyphenyllactic acid	0.765397	B(iii)			195.23	181.05	forward	1.74498e+06	6.22326e+06	2.56025e+06	3.43216e+06	6.60516e+06	1.46367e+06	9.65747e+06	2.9892e+06	0	6.26427e+06	2.90808e+06	3.26762e+06	3.48359e+06	3.25537e+06	7.44033e+06	3.72977e+06	3.35741e+06	9.27396e+06	2.42701e+06	3.77108e+06	4.33301e+06	1.38201e+06	4.14653e+06	4.90666e+06	3.98742e+06	5.12697e+06	4.15874e+06	7.26642e+06	4.88178e+06	0	795489	5.60648e+06	3.98401e+06	4.38095e+06	5.11496e+06	5.44687e+06	5.68383e+06
Triethanolamine	0.764264	B(iii)			175.502	150.113	forward	893503	1.12784e+06	1.22492e+06	1.03559e+06	1.37592e+06	1.00433e+06	880450	1.32429e+06	1.35115e+06	693940	709542	1.53835e+06	990917	1.41545e+06	1.90997e+06	5.15682e+06	2.38684e+06	1.20307e+06	823383	1.47672e+06	2.13654e+06	778368	1.87039e+06	864633	2.41189e+07	1.02306e+06	3.66421e+06	931984	732709	937822	1.08258e+06	914050	2.47641e+06	1.98565e+06	1.74476e+06	1.88627e+06	1.80245e+06
PC(16:0/16:0)	0.762799	B(iii)			172.891	734.569	forward	1.70938e+08	1.6155e+08	1.94316e+08	2.051e+08	3.19565e+08	2.2125e+08	1.87985e+08	2.13758e+08	1.6114e+08	2.31164e+08	2.56594e+08	2.43652e+08	2.23631e+08	1.99822e+08	2.09589e+08	2.1266e+08	2.19185e+08	2.47216e+08	1.62138e+08	1.86202e+08	2.32646e+08	2.30635e+08	1.74563e+08	1.81909e+08	4.71431e+08	2.26006e+08	3.65207e+08	3.26725e+08	2.97741e+08	2.88337e+08	2.46235e+08	2.85974e+08	2.23674e+08	2.1833e+08	2.08738e+08	2.00426e+08	2.08872e+08
1-Hydroxy-10-methylacridone	0.762636	B(iii)			412.385	226.084	forward	4.37087e+07	2.44081e+08	9.62388e+07	8.82227e+07	2.44826e+08	2.65793e+08	3.11897e+08	9.02461e+07	3.82063e+08	5.88864e+07	4.40173e+07	1.88941e+08	1.21962e+08	1.67993e+08	2.87689e+08	1.67785e+08	1.26669e+08	9.51482e+07	2.32157e+08	1.8881e+08	3.3586e+08	1.15004e+08	2.06774e+08	1.75653e+08	1.03247e+08	1.21824e+08	1.03616e+08	2.362e+08	1.99181e+08	2.57421e+08	1.06132e+08	8.13777e+07	1.53331e+08	1.65009e+08	1.65534e+08	1.73855e+08	1.67316e+08
4-Hydroxy-1H-indole-3-acetonitrile	0.762498	B(iii)			53.5315	173.071	forward	2.7935e+06	3.17856e+06	1.00699e+07	3.58286e+06	6.2501e+06	6.66423e+06	7.1589e+06	5.48956e+06	9.69951e+06	2.73104e+06	4.26012e+06	2.28582e+06	9.01305e+06	1.76403e+07	6.67492e+06	3.2942e+06	2.57906e+06	3.77943e+06	3.17876e+06	4.27421e+06	3.32001e+06	1.10832e+07	3.23244e+06	3.08592e+06	1.58706e+06	3.48916e+06	3.61975e+06	8.55635e+06	8.48089e+06	2.7036e+06	6.33537e+06	7.66144e+06	3.15689e+06	3.33965e+06	3.31156e+06	3.18751e+06	3.25375e+06
11,12-Dimethoxydihydrokawain	0.762007	B(iii)			471.649	293.136	forward	653914	437699	962470	845534	682794	1.12224e+06	1.76005e+06	409236	678041	2.69231e+06	1.25134e+06	2.44479e+06	912943	474104	927479	683403	1.30438e+06	654628	761503	564094	829272	2.41995e+06	953516	901313	1.06138e+06	708126	1.04678e+06	625104	1.17455e+06	1.53818e+06	930328	2.37205e+06	5.58636e+06	1.53208e+06	917572	914889	782352
PC(18:1(9Z)/P-18:1(11Z))	0.75929	B(iii)			166.538	770.605	forward	1.9942e+08	2.108e+08	1.82254e+08	2.82011e+08	1.19316e+08	1.51255e+08	1.43722e+08	2.39648e+08	1.34741e+08	1.2511e+08	9.47221e+07	1.12964e+08	1.10533e+08	1.59308e+08	1.02999e+08	1.66377e+08	1.46212e+08	1.84306e+08	2.63239e+08	1.99448e+08	2.58089e+08	3.00914e+08	1.99463e+08	1.68175e+08	4.79841e+07	9.22342e+07	1.19488e+08	1.44585e+08	9.53698e+07	1.11141e+08	1.0791e+08	1.73589e+08	1.58749e+08	1.64595e+08	1.61748e+08	1.54323e+08	1.8168e+08
Ethyl 1-(propylthio)propyl disulfide	0.757147	B(iii)			319.935	211.069	forward	4.18168e+06	2.88337e+06	3.12075e+06	3.62917e+06	2.45321e+06	2.03793e+06	2.07091e+06	2.71499e+06	2.85337e+06	3.11673e+06	3.65309e+06	2.79468e+06	3.21738e+06	3.34539e+06	2.2932e+06	3.45937e+06	2.99745e+06	4.90058e+06	2.6356e+06	3.71612e+06	3.34648e+06	2.87925e+06	2.27196e+06	2.06453e+06	2.90536e+06	3.29851e+06	3.25763e+06	3.29503e+06	2.85034e+06	3.37351e+06	2.94864e+06	2.34179e+06	2.72524e+06	3.36227e+06	3.26184e+06	3.17225e+06	3.2312e+06
3-Phosphoglyceric acid	0.753244	B(iii)			547.833	184.985	forward	3.10238e+07	4.48583e+07	2.66973e+07	4.07105e+07	3.78678e+07	4.08241e+07	1.17791e+07	4.48524e+07	5.75981e+07	2.97484e+07	3.63781e+07	8.51483e+06	4.28893e+07	3.3778e+07	1.78014e+07	3.63796e+07	4.52002e+07	3.92165e+07	2.2524e+07	4.93348e+07	4.15205e+07	3.70087e+07	4.33119e+07	9.10487e+06	2.50414e+07	2.85151e+07	5.47492e+07	3.58659e+07	3.3167e+07	4.08104e+07	3.8973e+07	4.36109e+07	3.93624e+07	3.56996e+07	3.75639e+07	3.829e+07	3.92505e+07
L-Octanoylcarnitine	0.75204	B(iii)			228.806	288.217	forward	5.55597e+06	4.71598e+06	1.62683e+07	2.01099e+07	2.06565e+07	2.03148e+07	4.12167e+07	5.73021e+07	1.37981e+07	6.27212e+06	1.04238e+07	3.82708e+06	1.39891e+07	4.58787e+07	6.69301e+07	3.48249e+07	3.8687e+06	8.92214e+06	2.05847e+07	6.94289e+06	2.13179e+07	2.26944e+07	2.34507e+07	2.20221e+07	2.06131e+07	8.56207e+06	5.81324e+06	9.6772e+06	9.66727e+06	6.94254e+06	1.69148e+07	3.16563e+07	2.06851e+07	2.08136e+07	1.97037e+07	2.18706e+07	2.13291e+07
PC(22:6(4Z,7Z,10Z,13Z,16Z,19Z)/20:2(11Z,14Z))	0.75153	B(iii)			181.127	858.615	forward	659090	548038	780192	534642	762376	784793	417572	1.09049e+06	192129	109634	402323	563209	0	388605	702083	694175	974344	703210	561515	808166	653875	385943	807399	696138	340131	538972	302803	533115	457300	505463	234189	612245	872711	382215	486285	483096	766578
2-Methyl-3-oxopropanoic acid	0.749153	B(iii)			377.167	103.039	forward	1.90682e+07	2.08317e+07	1.75545e+07	1.87009e+07	1.73468e+07	1.81688e+07	2.04461e+07	1.97689e+07	2.10983e+07	2.01747e+07	1.99207e+07	2.03709e+07	1.87689e+07	1.77825e+07	2.22368e+07	2.13993e+07	2.0282e+07	1.83796e+07	2.02593e+07	1.91132e+07	2.0092e+07	1.75674e+07	2.06478e+07	1.7275e+07	1.45811e+07	2.01222e+07	1.96508e+07	1.89274e+07	1.95607e+07	1.88493e+07	2.10397e+07	2.07533e+07	1.92615e+07	1.93457e+07	1.84135e+07	2.12599e+07	1.96737e+07
(9S,10E,12Z,15Z)-9-Hydroxy-10,12,15-octadecatrienoic acid	0.749096	B(iii)			33.9884	277.216	forward	3.68078e+06	5.77019e+06	5.91498e+06	8.63917e+06	6.33382e+06	9.61259e+06	5.92707e+06	6.75915e+06	5.5142e+06	5.45161e+06	4.58613e+06	7.39717e+06	4.29432e+06	5.78743e+06	4.95796e+06	6.15661e+06	5.851e+06	5.08868e+06	3.98314e+06	5.04797e+06	3.35827e+06	5.39324e+06	5.85767e+06	4.54044e+06	6.47241e+06	4.6743e+06	4.43687e+06	5.5753e+06	3.7002e+06	6.88957e+06	4.52754e+06	4.21576e+06	3.55376e+06	3.28134e+06	4.02448e+06	3.99349e+06	4.32277e+06
7-(Methylthio)heptanenitrile	0.748656	B(iii)			82.2577	158.097	forward	1.83883e+06	1.68266e+06	1.20159e+06	1.55809e+06	1.63532e+06	2.01654e+06	1.77359e+06	1.74897e+06	1.75262e+06	1.59454e+06	1.83334e+06	1.1677e+06	1.60944e+06	1.79604e+06	5.20687e+06	1.65372e+06	1.53629e+06	1.69852e+06	1.82962e+06	1.67197e+06	1.59115e+06	1.16141e+06	2.38034e+06	1.80917e+06	1.67921e+06	1.63681e+06	1.56402e+06	1.6732e+06	1.58222e+06	1.49653e+06	3.06904e+06	5.44716e+06	1.54022e+06	1.58658e+06	1.4939e+06	1.51951e+06	1.51377e+06
Indole	0.748283	B(iii)			32.8446	118.065	forward	1.09513e+07	1.25763e+07	1.08973e+07	1.26629e+07	9.59825e+06	1.22359e+07	1.14342e+07	1.27914e+07	9.42059e+06	1.16676e+07	1.0409e+07	1.44796e+07	1.03298e+07	1.3241e+07	1.28805e+07	1.2363e+07	1.13981e+07	1.03501e+07	1.19842e+07	1.13386e+07	1.24742e+07	1.22498e+07	1.51508e+07	1.26998e+07	1.0347e+07	1.26188e+07	1.35298e+07	1.4608e+07	9.36195e+06	1.1577e+07	1.53272e+07	1.23169e+07	1.67561e+07	1.94861e+07	1.76001e+07	1.74751e+07	2.03341e+07
Limocitrin	0.748128	B(iii)			191.859	345.06	forward	1.12125e+06	2.18161e+06	2.43512e+06	3.81322e+06	2.73298e+06	3.08193e+06	1.43233e+06	2.99603e+06	2.35855e+06	4.58891e+06	3.21112e+06	2.72427e+06	8.6641e+06	1.75366e+06	4.33677e+06	4.76638e+06	2.16183e+06	2.45755e+06	5.26207e+06	2.84229e+06	1.82318e+06	5.10492e+06	3.49412e+06	5.20699e+06	7.08065e+06	2.90703e+06	3.26869e+06	4.70738e+06	2.12949e+06	4.83951e+06	1.8935e+06	4.62627e+06	3.59403e+06	3.9007e+06	3.74803e+06	3.78344e+06	2.71407e+06
(10E,12Z)-(9S)-9-Hydroperoxyoctadeca-10,12-dienoic acid	0.748006	B(iii)			168.23	311.223	forward	1.39751e+06	1.52523e+06	1.71515e+06	2.39242e+06	4.39303e+06	8.87215e+06	4.06102e+06	2.06231e+06	2.06787e+06	1.76157e+06	1.8733e+06	1.69834e+06	2.08829e+06	2.42815e+06	4.57543e+06	1.76726e+06	1.85233e+06	1.93033e+06	761851	1.76654e+06	558757	2.74558e+06	1.47803e+06	2.27527e+06	4.28827e+06	1.74731e+06	1.92164e+06	821963	1.4829e+06	2.18169e+06	3.31711e+06	9.71487e+06	2.43445e+06	2.31308e+06	2.7603e+06	2.31781e+06	2.16013e+06
Norizalpinin	0.747708	B(iii)			358.065	269.05	forward	965893	729939	601855	699018	683147	481144	480583	654565	680826	605664	598436	562171	550192	632348	494979	635752	722671	730167	559716	604963	587585	475632	627021	518029	331752	538064	601549	422477	620493	435835	827468	694949	456408	563910	590909	631934	659002
Pseudoionone	0.747007	B(iii)			33.9797	193.159	forward	7.26046e+06	7.49939e+06	6.15441e+06	4.05521e+06	4.59196e+06	7.56133e+06	4.47228e+06	5.62307e+06	3.2087e+06	7.26009e+06	5.5432e+06	4.74985e+06	5.5122e+06	8.95691e+06	7.49763e+06	6.83139e+06	4.70017e+06	6.45884e+06	8.06261e+06	5.49347e+06	1.17924e+07	7.39167e+06	8.70882e+06	8.01074e+06	7.87901e+06	9.2257e+06	9.8401e+06	9.83088e+06	4.17211e+06	6.38492e+06	5.85965e+06	8.64676e+06	7.94518e+06	8.65159e+06	8.20892e+06	7.95337e+06	1.04771e+07
Adipic acid	0.7441	B(iii)			546.512	145.05	forward	3.20491e+06	1.3126e+07	3.56198e+06	4.66316e+06	2.79849e+06	1.40783e+07	8.82016e+06	3.70732e+06	1.31408e+07	4.33636e+06	1.26011e+07	6.81181e+06	3.89742e+06	6.51177e+06	1.44973e+07	4.96505e+06	3.04447e+06	1.73485e+07	3.10307e+06	3.98511e+06	2.2964e+06	5.9564e+06	9.65816e+06	7.20487e+06	6.46126e+06	1.19373e+07	8.68513e+06	2.42714e+06	3.75832e+06	6.30079e+06	2.64938e+06	5.68729e+06	3.92957e+06	5.338e+06	8.67871e+06	4.11502e+06	1.40145e+07
4-Amino-2-methylenebutanoic acid	0.743148	B(iii)			456.512	116.071	forward	4.43141e+06	1.83673e+07	1.74122e+07	1.60188e+07	8.7631e+06	8.36366e+06	8.48747e+06	5.60411e+06	1.59643e+07	1.16054e+07	1.063e+07	2.0083e+07	2.7224e+07	1.10908e+07	7.62777e+06	3.0993e+07	1.07196e+07	1.0261e+07	7.17353e+06	1.30409e+07	1.23181e+07	8.14835e+06	1.03891e+07	8.00604e+06	1.60284e+07	1.08659e+07	1.57884e+07	1.29828e+07	9.28393e+06	1.53274e+07	8.27908e+06	7.46915e+06	9.79268e+06	2.11011e+07	1.21795e+07	2.51204e+07	1.30168e+07
SM(d18:1/16:0)	0.742405	B(iii)			205.861	703.573	forward	4.72565e+08	4.64214e+08	4.36652e+08	5.26643e+08	5.83583e+08	4.96315e+08	4.97401e+08	4.52389e+08	4.48044e+08	5.04042e+08	5.58336e+08	4.80729e+08	5.54299e+08	4.57598e+08	5.46123e+08	5.27985e+08	5.39769e+08	4.1666e+08	4.61619e+08	4.95009e+08	4.99028e+08	5.02093e+08	5.18531e+08	6.05929e+08	1.05899e+09	5.14613e+08	6.68497e+08	6.01515e+08	6.21682e+08	6.11572e+08	4.16706e+08	5.14174e+08	5.37773e+08	5.29362e+08	5.19455e+08	5.13428e+08	4.83331e+08
Salviaflaside methyl ester	0.741924	B(iii)			232.163	537.17	forward	1.12596e+07	9.20113e+06	2.62246e+07	2.29097e+07	1.0131e+07	6.74343e+06	2.42891e+07	3.86586e+06	8.09929e+06	2.24257e+07	1.4839e+07	8.77541e+06	9.14252e+06	1.07672e+07	5.65479e+06	7.10075e+06	1.80035e+07	2.08987e+07	5.36389e+06	8.90961e+06	1.32369e+07	1.02317e+07	9.91229e+06	2.04671e+07	2.62067e+07	2.6585e+07	5.06539e+06	2.28428e+07	2.65157e+07	1.2111e+07	2.59889e+06	4.7637e+06	1.5889e+07	1.63695e+07	1.33469e+07	1.34964e+07	1.31638e+07
4-Oxo-2-nonenal	0.738751	B(iii)			37.0372	155.107	forward	1.70102e+07	1.48203e+07	1.11891e+07	1.90456e+07	1.36791e+07	2.77154e+07	1.03541e+07	1.24437e+07	5.59448e+06	1.86755e+07	1.86175e+07	2.35792e+07	1.79367e+07	2.2413e+07	1.90621e+07	1.95224e+07	1.38121e+07	2.01482e+07	1.27905e+07	2.90733e+07	1.28171e+07	1.88827e+07	2.08442e+07	1.27213e+07	1.1104e+07	2.15348e+07	1.7722e+07	2.10698e+07	7.9984e+06	2.56974e+07	1.8505e+07	1.17419e+07	2.2827e+07	2.31969e+07	2.62277e+07	2.45372e+07	2.29251e+07
Alpha-D-Glucose 1,6-bisphosphate	0.738484	B(iii)			494.408	338.989	forward	7.98698e+06	6.32508e+06	5.60935e+06	8.25492e+06	8.00975e+06	5.40531e+06	6.28654e+06	9.62643e+06	7.57369e+06	5.19827e+06	5.14205e+06	7.8624e+06	7.79169e+06	6.48117e+06	7.56976e+06	2.40311e+07	3.6561e+06	6.06434e+06	5.81603e+06	5.43771e+06	5.24799e+06	2.98941e+06	6.15014e+06	4.18465e+06	1.50411e+06	6.88073e+06	3.80815e+06	3.67803e+06	4.06745e+06	5.38795e+06	4.93785e+06	7.28877e+06	5.80373e+06	5.26268e+06	8.30503e+06	5.16853e+06	4.93826e+06
Phosphoserine	0.737418	B(iii)			440.829	184.001	forward	1.59435e+06	1.46219e+06	1.21739e+06	1.12024e+06	1.43436e+06	1.33976e+06	1.66906e+06	1.67309e+06	1.5808e+06	1.51247e+06	2.58956e+06	2.22498e+06	1.67666e+06	1.54575e+06	1.58435e+06	2.49686e+06	1.48246e+06	1.67103e+06	1.20191e+06	1.8782e+06	1.7104e+06	1.11268e+06	1.56958e+06	1.1642e+06	1.89112e+06	1.95045e+06	2.55749e+06	2.13298e+06	1.51728e+06	1.55722e+06	1.37834e+06	2.59136e+06	1.96347e+06	1.46902e+06	1.37792e+06	1.53979e+06	1.49242e+06
L-cis-3-Amino-2-pyrrolidinecarboxylic acid	0.737141	B(iii)			257.964	131.082	forward	912728	815601	1.5581e+06	933362	843644	1.06972e+06	1.13172e+06	702552	1.04892e+06	1.14938e+06	1.07756e+06	1.12786e+06	808954	877442	776685	921263	916788	941754	1.15572e+06	970458	1.08485e+06	1.13905e+06	882518	1.20003e+06	1.30849e+06	1.08399e+06	1.06151e+06	749297	1.16393e+06	1.0169e+06	1.05327e+06	1.1256e+06	861175	944357	1.10127e+06	926336	921753
1,2,3-Trihydroxybenzene	0.737076	B(iii)			480.543	127.039	forward	1.11511e+08	1.03624e+08	7.88958e+07	4.49754e+07	9.89376e+07	7.38656e+07	5.16649e+07	1.47297e+08	1.35897e+08	5.0594e+07	5.93893e+07	8.23482e+07	9.2727e+07	9.16041e+07	1.41034e+08	1.554e+08	5.44128e+07	1.30151e+08	4.57385e+07	6.86011e+07	6.35855e+07	3.68984e+07	6.19868e+07	3.38356e+07	1.17482e+07	4.50495e+07	7.68771e+07	4.28307e+07	5.63372e+07	6.60771e+07	5.09954e+07	8.42884e+07	8.09025e+07	8.03752e+07	8.23247e+07	8.61179e+07	8.04494e+07
Methylimidazoleacetic acid	0.736359	B(iii)			317.676	141.066	forward	2.88782e+07	1.90123e+07	1.81235e+07	1.38955e+07	1.98992e+07	2.72184e+07	1.79594e+07	1.35096e+07	1.19123e+07	2.05009e+07	2.16735e+07	1.89473e+07	1.01949e+07	8.95658e+06	1.24208e+07	1.35413e+07	1.55513e+07	7.45516e+07	1.17023e+07	1.85977e+07	1.18331e+07	1.29736e+07	9.98136e+06	1.17948e+07	1.77145e+07	1.74131e+07	2.52199e+07	3.41237e+07	2.15866e+07	2.5689e+07	2.51249e+07	4.08871e+07	1.90855e+07	2.48302e+07	1.95089e+07	2.00997e+07	1.90026e+07
PC(22:2(13Z,16Z)/16:1(9Z))	0.735345	B(iii)			165.352	812.616	forward	2.43724e+07	2.54508e+07	2.36715e+07	2.46059e+07	3.05003e+07	3.57174e+07	2.09936e+07	2.61406e+07	1.98828e+07	2.77751e+07	2.53092e+07	2.95358e+07	2.78721e+07	2.36757e+07	2.59776e+07	2.59357e+07	2.90058e+07	3.1338e+07	2.35621e+07	3.51759e+07	3.63844e+07	3.01066e+07	2.67371e+07	3.26213e+07	7.33789e+07	3.16185e+07	2.90238e+07	2.82377e+07	2.93249e+07	3.30223e+07	2.62728e+07	4.14204e+07	2.97292e+07	3.18556e+07	3.23427e+07	2.85738e+07	2.91577e+07
PC(20:2(11Z,14Z)/15:0)	0.734862	B(iii)			168.784	772.584	forward	5.86012e+07	3.68536e+07	3.69502e+07	4.10655e+07	5.81882e+07	6.43399e+07	4.68881e+07	2.7039e+07	3.87656e+07	2.89587e+07	5.36602e+07	6.19925e+07	4.10688e+07	3.38295e+07	4.88197e+07	3.39943e+07	3.0285e+07	5.0367e+07	3.67587e+07	8.38728e+07	4.34082e+07	2.91363e+07	3.84636e+07	3.58291e+07	4.59786e+07	4.83233e+07	4.20529e+07	3.46492e+07	5.1964e+07	6.00083e+07	3.54181e+07	3.89801e+07	4.27903e+07	4.02872e+07	3.97747e+07	3.61657e+07	3.75819e+07
Lysyl-Leucine	0.734446	B(iii)			573.808	260.197	forward	7.9812e+06	5.70027e+06	1.82898e+07	1.30438e+07	7.83978e+06	1.15861e+07	3.8461e+06	1.7432e+07	1.48721e+07	1.13599e+07	6.35686e+06	1.37101e+07	8.13912e+06	2.20154e+07	8.3009e+06	8.96394e+06	9.56971e+06	4.23253e+06	9.55328e+06	1.14127e+07	8.13949e+06	9.91724e+06	1.29574e+07	4.3363e+06	2.39525e+06	1.71152e+07	1.12563e+06	3.33049e+06	3.49111e+06	3.98374e+06	9.67013e+06	4.22668e+06	6.94094e+06	8.86858e+06	9.78718e+06	9.95515e+06	9.87707e+06
Metenamine	0.734333	B(iii)			308.612	141.113	forward	5.4892e+06	9.63897e+06	9.56703e+06	1.11238e+07	9.70449e+06	9.33103e+06	4.90269e+06	5.99773e+06	5.8604e+06	9.68859e+06	9.16963e+06	6.30704e+06	5.26587e+06	4.82598e+06	8.64466e+06	5.6021e+06	9.72457e+06	5.95404e+06	6.61965e+06	6.32219e+06	4.55246e+06	8.98632e+06	7.61207e+06	7.09229e+06	6.20717e+06	5.77046e+06	6.21406e+06	4.71125e+06	1.00957e+07	6.60317e+06	9.17387e+06	6.93089e+06	7.91138e+06	8.81929e+06	8.56847e+06	4.92041e+06	6.26337e+06
2-O-(5,8,11,14,17-Eicosapentaenoyl)-1-O-hexadecylglycero-3-phosphocholine	0.733913	B(iii)			165.348	766.573	forward	2.03262e+08	1.61524e+08	2.92201e+08	1.39358e+08	1.84056e+08	2.24e+08	4.74462e+08	2.10935e+08	3.13211e+08	3.21319e+08	4.43948e+08	3.00313e+08	4.03596e+08	4.00295e+08	2.75628e+08	4.36072e+08	2.81591e+08	2.44835e+08	2.48699e+08	1.70963e+08	2.22009e+08	3.32881e+08	2.16173e+08	1.80953e+08	1.89452e+08	2.7696e+08	1.94664e+08	3.51347e+08	3.41623e+08	2.1536e+08	4.15904e+08	2.08128e+08	1.20326e+08	2.18646e+08	1.35e+08	3.19554e+08	2.37621e+08
Serylthreonine	0.733068	B(iii)			309.642	207.099	forward	7.77201e+06	1.15575e+07	1.12401e+07	9.16584e+06	1.06409e+07	1.16391e+07	9.13907e+06	3.33891e+07	8.30679e+06	1.07428e+07	8.65684e+06	1.48604e+07	8.84805e+06	9.95839e+06	1.00587e+07	2.91002e+07	1.11185e+07	1.04655e+07	3.33029e+07	1.88196e+07	9.53042e+06	9.78514e+06	2.8553e+07	9.38093e+06	1.41161e+07	1.09098e+07	2.79227e+07	9.58334e+06	2.95114e+07	3.02555e+07	1.2718e+07	7.42804e+06	8.01489e+06	9.96179e+06	9.96026e+06	1.0727e+07	3.01603e+07
5-Acetyl-2,4-dimethyloxazole	0.733029	B(iii)			292.653	140.068	forward	1.13078e+08	1.00502e+08	1.07027e+08	9.64473e+07	9.63915e+07	1.06761e+08	1.05601e+08	1.11174e+08	9.95975e+07	9.26678e+07	1.08126e+08	1.06249e+08	1.0344e+08	9.08188e+07	9.51341e+07	9.86363e+07	9.73002e+07	8.74792e+07	1.02118e+08	9.94807e+07	9.99647e+07	1.05693e+08	1.18495e+08	1.08836e+08	9.15085e+07	1.08023e+08	9.55465e+07	9.0399e+07	9.22081e+07	8.63937e+07	1.09623e+08	1.13322e+08	102731249	1.05073e+08	1.06574e+08	1.04219e+08	1.01625e+08
para-Trifluoromethylphenol	0.732707	B(iii)			30.9735	163.039	forward	3.24492e+06	1.82522e+07	3.52207e+06	1.19777e+07	1.05145e+07	1.27809e+07	2.4643e+06	4.50731e+06	6.33174e+06	3.47997e+07	4.46721e+06	3.30651e+07	2.13406e+07	7.71861e+06	2.09254e+07	4.50964e+06	5.37533e+07	1.02854e+07	1.49678e+07	6.97818e+07	7.97166e+07	8.94987e+06	1.46128e+07	2.6047e+07	2.94049e+06	8.72496e+06	6.39349e+06	3.93632e+06	5.45783e+06	7.37111e+06	1.22719e+07	2.5828e+07	1.63066e+07	1.66979e+07	1.72013e+07	1.76824e+07	1.80196e+07
Homo-L-arginine	0.731661	B(iii)			560.97	189.135	forward	2.68771e+07	2.00436e+07	2.09988e+07	3.14761e+07	1.07472e+07	1.20485e+07	7.89105e+06	2.39426e+07	5.85738e+07	1.4278e+07	2.39287e+07	4.84919e+07	2.2337e+07	3.42202e+07	1.12064e+07	2.15446e+07	2.21287e+07	1.83374e+07	1.04525e+07	2.18581e+07	2.10391e+07	1.16137e+07	1.86382e+07	1.11219e+07	8.5664e+06	2.88508e+07	1.28917e+07	1.88882e+07	1.92986e+07	9.48248e+06	2.15748e+07	8.80229e+06	1.57731e+07	2.37893e+07	2.15233e+07	2.75582e+07	2.57666e+07
2-Methyl-1-hydroxybutyl-ThPP	0.729099	B(iii)			333.957	511.107	forward	470504	696942	420136	872650	387589	591610	411128	723153	881274	1.05355e+06	1.19096e+06	910592	1.58345e+06	687827	1.07452e+06	3.1278e+06	268720	1.11509e+06	869147	808336	752306	1.27155e+06	1.39012e+06	1.34594e+06	1.36416e+06	734073	977280	1.97392e+06	754107	2.35335e+06	470067	944174	2.44519e+06	1.36746e+06	1.73509e+06	1.91298e+06	1.52993e+06
(2S,4R,5S)-Muscarine	0.728074	B(iii)			270.969	174.149	forward	3.44047e+06	1.22044e+06	4.71973e+06	2.18525e+06	2.26908e+06	649846	5.14841e+06	2.7357e+06	752300	761189	5.68253e+06	312552	218882	1.02527e+06	1.38483e+06	1.45589e+06	2.36017e+06	340883	1.10419e+06	706711	2.71095e+06	2.26484e+06	693169	3.78779e+06	1.13383e+06	1.03211e+06	819741	2.18996e+06	1.17405e+06	488414	1.26357e+06	1.33005e+06	1.74095e+06	1.81301e+06	1.90222e+06	1.83239e+06	1.96361e+06
N-Methylsalsolinol	0.727837	B(iii)			588.874	194.118	forward	5.91683e+07	5.60468e+07	6.147e+07	4.69904e+07	6.70552e+07	4.00452e+07	5.25193e+07	8.25844e+07	5.3032e+07	6.095e+07	5.8016e+07	5.98875e+07	7.92914e+07	6.18273e+07	5.91465e+07	5.59427e+07	5.73238e+07	5.78091e+07	6.0942e+07	5.82006e+07	5.90119e+07	6.03337e+07	6.12338e+07	6.63043e+07	8.12819e+07	6.24008e+07	6.68363e+07	6.05969e+07	6.12945e+07	6.00925e+07	5.6262e+07	6.22967e+07	6.14845e+07	5.85674e+07	5.83701e+07	6.36684e+07	6.05579e+07
N-Acetyl-L-alanine	0.727726	B(iii)			257.805	130.05	forward	2.37132e+06	3.00783e+06	1.54417e+06	2.68355e+06	3.73698e+06	2.48471e+06	3.75431e+06	2.84934e+06	2.89883e+06	2.10852e+06	2.58556e+06	2.38544e+06	3.52529e+06	3.58838e+06	2.54156e+06	2.7738e+06	2.1559e+06	2.50889e+06	2.5151e+06	2.50062e+06	3.46289e+06	2.36821e+06	2.59593e+06	2.53376e+06	3.91928e+06	2.23706e+06	3.89898e+06	3.26629e+06	3.1624e+06	4.27076e+06	3.22351e+06	2.83472e+06	3.05471e+06	3.2495e+06	2.85392e+06	3.16945e+06	3.03377e+06
Mesaconic acid	0.727622	B(iii)			189.924	129.018	forward	2.09136e+07	2.14143e+07	1.81001e+07	3.50794e+07	3.54333e+07	2.22694e+07	3.15307e+07	3.41617e+07	2.31483e+07	4.04763e+07	3.42207e+07	4.2086e+07	2.48104e+07	2.40777e+07	4.03962e+07	4.79903e+07	1.95856e+07	2.36253e+07	4.01071e+07	2.20238e+07	2.86663e+07	1.83794e+07	3.59249e+07	4.04206e+07	3.58018e+07	2.3369e+07	2.71709e+07	3.21722e+07	2.14562e+07	2.82311e+07	2.8641e+07	4.02441e+07	2.18617e+07	1.85097e+07	2.07854e+07	2.38271e+07	2.28675e+07
Cytidine monophosphate N-acetylneuraminic acid	0.72667	B(iii)			436.247	613.141	forward	138948	212387	273172	207696	198878	206688	161137	238364	215474	150927	160181	87166.7	109652	371476	438962	213450	110977	139556	172201	132771	186376	130357	295966	151621	65608.1	174375	126902	110437	90968.8	80641.2	97473.4	141935	183933	231198	182531	202030	226864
PC(20:3(8Z,11Z,14Z)/20:1(11Z))	0.726384	B(iii)			128.349	838.632	forward	4.01016e+06	984115	1.81286e+06	2.79365e+06	1.13429e+06	1.49936e+06	1.33478e+06	1.82566e+06	544622	1.07477e+06	620312	853794	628236	814683	1.10136e+06	1.35662e+06	1.48834e+06	1.35944e+06	1.00886e+06	2.10068e+06	1.62147e+06	2.08238e+06	1.9153e+06	1.35052e+06	2.04677e+06	1.60301e+06	1.71004e+06	855158	1.24584e+06	1.39871e+06	151286	2.66212e+06	1.34569e+06	1.21826e+06	1.26504e+06	837393	1.24887e+06
Argpyrimidine	0.723331	B(iii)			561.023	255.145	forward	1.32208e+06	669175	1.41154e+06	1.70857e+06	375247	700225	456289	1.40899e+06	1.71418e+06	1.03502e+06	1.38108e+06	1.64969e+06	701108	2.45212e+06	488280	785341	759915	489061	504487	802068	674597	967295	913080	219166	207445	1.02175e+06	426876	568451	482783	359821	732935	407956	719013	906441	1.04294e+06	1.02091e+06	1.05738e+06
CDP-Ethanolamine	0.722771	B(iii)			454.078	447.068	forward	198719	144887	173253	248610	291356	157117	301885	167714	164630	182416	199338	187734	281841	313018	194613	409162	120373	134073	94354.4	187080	205085	183327	273282	152648	118742	206547	170887	156977	173422	205470	145067	212565	218655	248189	206689	149171	236873
1-deoxy-1-(N6-lysino)-D-fructose	0.722453	B(iii)			442.735	132.029	forward	4.25544e+06	4.31467e+06	2.36325e+06	3.97483e+06	1.03046e+07	3.68424e+06	5.24049e+06	1.7385e+06	6.04127e+06	1.88334e+06	5.53726e+06	2.24184e+06	4.53922e+06	1.08696e+07	4.77321e+06	3.63072e+06	2.19884e+06	2.1703e+06	2.51053e+06	3.77491e+06	3.07394e+06	3.17697e+06	4.13109e+06	2.16969e+06	3.10982e+06	2.79022e+06	4.51307e+06	3.72881e+06	3.65234e+06	3.14422e+06	2.47995e+06	2.56636e+06	1.04488e+07	4.00973e+06	4.05736e+06	4.02374e+06	4.02296e+06
Threoninyl-Isoleucine	0.721469	B(iii)			261.19	233.15	forward	3.27592e+06	715966	4.53033e+06	8.8093e+06	2.85204e+06	2.11847e+06	844647	950843	352202	4.53036e+06	1.71909e+06	2.73266e+06	2.51729e+06	8.00866e+06	1.20109e+06	5.09217e+06	1.78638e+06	1.32065e+06	2.90729e+06	1.07345e+06	5.12234e+06	2.98201e+06	1.25937e+06	3.8049e+06	2.34352e+06	5.60568e+06	1.2991e+06	3.96139e+06	2.04662e+06	3.05784e+06	4.29661e+06	1.52891e+06	2.18489e+06	3.19777e+06	2.88477e+06	3.04909e+06	2.82774e+06
2-Methoxy-3-methylpyrazine	0.718208	B(iii)			177.762	125.071	forward	1.46176e+07	1.44246e+07	1.49903e+07	1.45134e+07	1.83489e+07	1.42184e+07	1.65808e+07	1.30185e+07	1.92104e+07	1.57351e+07	2.04051e+07	1.90848e+07	1.28287e+07	1.3864e+07	1.39825e+07	1.57345e+07	1.84372e+07	1.4262e+07	1.57692e+07	2.28279e+07	1.6906e+07	1.44299e+07	1.41628e+07	1.38579e+07	1.38068e+07	1.76552e+07	2.35411e+07	1.58778e+07	1.89773e+07	2.11797e+07	1.87979e+07	1.99498e+07	1.70893e+07	1.59734e+07	1.60074e+07	1.45148e+07	1.35865e+07
Sedoheptulose	0.717841	B(iii)			456.103	233.067	forward	2.29234e+06	1.78812e+06	2.7514e+06	2.14835e+06	2.02291e+06	2.1872e+06	2.25213e+06	1.94002e+06	1.59165e+06	1.99458e+06	2.38822e+06	2.643e+06	2.1533e+06	2.3247e+06	1.73204e+06	2.18308e+06	2.25795e+06	2.4817e+06	1.64698e+06	2.29555e+06	1.65366e+06	1.46716e+06	1.73952e+06	1.74585e+06	1.25238e+06	1.67261e+06	1.86848e+06	1.71061e+06	2.04227e+06	2.2966e+06	2.16284e+06	2.11742e+06	2.74238e+06	2.26704e+06	2.77589e+06	2.82228e+06	2.04691e+06
Phenylpyruvic acid	0.717665	B(iii)			73.1972	163.039	forward	1.19181e+07	1.23384e+07	1.45896e+07	9.18653e+06	1.1688e+07	2.81618e+07	2.06048e+07	2.19309e+07	1.02595e+07	9.54384e+06	9.66158e+06	1.31311e+07	1.09557e+07	1.30945e+07	2.0589e+07	1.04743e+07	1.25739e+07	1.70762e+07	1.50497e+07	7.25769e+06	7.91075e+06	1.3956e+07	1.29191e+07	1.22866e+07	7.11283e+06	2.06769e+07	1.18178e+07	1.01936e+07	1.1373e+07	1.01797e+07	3.34944e+07	2.6923e+07	2.17029e+07	8.63041e+06	1.3557e+07	8.6512e+06	7.75165e+06
Valyl-Lysine	0.716581	B(iii)			585.424	246.181	forward	6.66698e+07	4.99579e+07	6.45299e+07	7.2931e+07	5.24262e+07	4.50163e+07	5.81827e+07	7.69603e+07	8.92845e+07	6.48934e+07	4.829e+07	5.4439e+07	5.11522e+07	1.00889e+08	4.94567e+07	5.98553e+07	5.02074e+07	5.8889e+07	4.80768e+07	5.00201e+07	7.02742e+07	5.54585e+07	5.49663e+07	3.83225e+07	2.5729e+07	6.58841e+07	5.22728e+07	5.41817e+07	4.59958e+07	3.38988e+07	5.10622e+07	3.26471e+07	3.55167e+07	5.8197e+07	6.06774e+07	6.48072e+07	6.63482e+07
Ascorbic acid	0.713757	B(iii)			366.134	175.024	forward	3.48959e+06	4.89598e+06	3.95417e+06	5.09433e+06	4.80107e+06	4.96113e+06	7.26708e+06	2.94876e+06	6.1093e+06	2.9984e+06	3.56754e+06	4.18204e+06	4.90955e+06	7.149e+06	5.25773e+06	3.68355e+06	1.76085e+06	1.67057e+06	2.30977e+06	4.1369e+06	4.72302e+06	3.33056e+06	3.43178e+06	4.13164e+06	3.95339e+06	2.77774e+06	4.6274e+06	3.95508e+06	4.61184e+06	5.1686e+06	2.17831e+06	3.1959e+06	4.42221e+06	4.29142e+06	4.04353e+06	3.91697e+06	3.83759e+06
PC(22:4(7Z,10Z,13Z,16Z)/P-18:0)	0.712224	B(iii)			126.019	822.636	forward	6.96113e+06	3.72227e+06	2.77174e+06	1.3086e+07	1.25397e+07	4.51497e+06	4.03802e+06	3.63418e+06	6.45689e+06	4.56544e+06	3.43926e+06	2.3519e+06	4.79644e+06	5.04367e+06	3.6884e+06	1.38547e+07	2.98274e+06	2.90847e+06	3.87001e+06	4.13195e+06	4.09466e+06	1.23179e+07	5.072e+06	4.9539e+06	2.3752e+06	3.3554e+06	5.93602e+06	3.63757e+06	1.31974e+07	1.53135e+07	4.12879e+06	1.45221e+07	3.89749e+06	3.15987e+06	4.98739e+06	4.03654e+06	4.2027e+06
Fagomine	0.709192	B(iii)			342.568	148.097	forward	3.1903e+06	3.71804e+06	3.16067e+06	3.16859e+06	3.09365e+06	3.78406e+06	4.69547e+06	3.64648e+06	5.22143e+06	4.46642e+06	3.85183e+06	5.08164e+06	5.31909e+06	3.94963e+06	4.41958e+06	6.80235e+06	2.73336e+06	3.85611e+06	3.66693e+06	4.05535e+06	6.31982e+06	3.76568e+06	2.75466e+06	2.99688e+06	2.36658e+06	2.81462e+06	4.19494e+06	4.36642e+06	2.13281e+06	4.83248e+06	3.33788e+06	4.62975e+06	3.13399e+06	4.49736e+06	4.06639e+06	4.08495e+06	4.58897e+06
Dihydrouracil	0.707326	B(iii)			369.302	115.051	forward	5.55903e+06	6.47122e+06	4.71461e+06	6.31502e+06	5.45561e+06	5.99514e+06	6.42602e+06	4.91774e+06	5.47942e+06	5.2872e+06	4.32066e+06	3.55548e+06	4.29575e+06	4.73175e+06	5.89118e+06	5.63469e+06	5.38156e+06	4.39529e+06	4.74887e+06	5.15444e+06	4.71986e+06	5.51538e+06	5.82784e+06	6.298e+06	4.19745e+06	6.03746e+06	5.29815e+06	5.01902e+06	5.04918e+06	5.22366e+06	5.56493e+06	5.68416e+06	5.30438e+06	4.22023e+06	5.45769e+06	3.70588e+06	5.25329e+06
2,5-Dimethyl-4-(1-pyrrolidinyl)-3(2H)-furanone	0.706944	B(iii)			48.8822	182.118	forward	0	0	354025	0	1.12551e+07	2.25174e+06	0	0	0	0	0	0	0	0	0	0	0	0	0	0	0	0	0	0	0	0	0	0	0	4.60401e+07	0	0	1.28679e+06	1.53643e+06	1.16874e+06	1.14967e+06	2.01067e+06
Leucyl-Asparagine	0.706154	B(iii)			323.334	246.153	forward	1.46673e+06	1.31506e+07	8.26942e+06	8.21355e+06	9.75842e+06	1.09637e+07	2.46899e+07	8.18745e+06	1.15822e+07	1.58193e+07	1.20038e+07	1.73696e+06	8.12329e+06	7.10404e+06	9.25523e+06	4.13698e+06	4.71729e+06	1.41631e+07	5.00981e+06	1.17571e+07	8.07311e+06	1.02912e+07	6.43665e+06	9.4153e+06	9.06467e+06	1.49533e+07	2.26714e+07	1.9111e+07	3.48747e+06	8.53686e+06	6.43011e+06	8.61008e+06	9.74046e+06	1.07893e+07	1.1496e+07	1.0884e+07	1.0729e+07
4-(Butoxymethyl)-2-methoxyphenol	0.705416	B(iii)			576.197	211.13	forward	3.19731e+07	3.64673e+07	3.3621e+07	2.82297e+07	3.25748e+07	3.09708e+07	2.72753e+07	3.79629e+07	3.57504e+07	3.00849e+07	2.5478e+07	2.55363e+07	2.9499e+07	3.29577e+07	3.49164e+07	3.07465e+07	3.45123e+07	3.11941e+07	3.56735e+07	2.95924e+07	3.32488e+07	3.09816e+07	3.65328e+07	3.13732e+07	2.90136e+07	3.44711e+07	3.17241e+07	3.08423e+07	3.01151e+07	2.98106e+07	3.38922e+07	2.93964e+07	2.92764e+07	3.14555e+07	3.21906e+07	3.17976e+07	3.31532e+07
4'-O-methyl-(-)-epicatechin-3'-O-beta-glucuronide	0.704702	B(iii)			471.716	495.15	forward	3.28857e+06	2.35836e+06	4.07857e+06	4.70574e+06	3.77872e+06	3.65287e+06	5.19858e+06	1.17686e+06	2.69299e+06	4.0516e+06	4.73842e+06	6.39113e+06	4.99831e+06	3.9662e+06	2.59605e+06	3.04206e+06	4.52692e+06	3.57331e+06	3.27151e+06	5.51293e+06	3.83256e+06	4.63551e+06	3.00348e+06	3.94188e+06	4.64415e+06	3.56767e+06	3.45029e+06	4.56169e+06	2.62608e+06	5.34874e+06	3.45862e+06	3.52572e+06	3.52267e+06	4.34893e+06	4.05401e+06	3.16235e+06	3.2809e+06
1-Deoxy-D-xylulose 5-phosphate	0.704154	B(iii)			81.2679	213.017	forward	4.73863e+07	3.26063e+07	3.96584e+07	3.92165e+07	2.68182e+07	3.24692e+07	2.34426e+07	3.03017e+07	3.20222e+07	3.35596e+07	3.95288e+07	4.16788e+07	4.31136e+07	3.94552e+07	2.70258e+07	4.51363e+07	3.52834e+07	3.30681e+07	4.21834e+07	3.62405e+07	3.33955e+07	2.29492e+07	3.89561e+07	4.39998e+07	3.33883e+07	3.28269e+07	3.48605e+07	3.55718e+07	3.1788e+07	4.05305e+07	2.97623e+07	4.30657e+07	3.38411e+07	3.02928e+07	2.84438e+07	2.80213e+07	2.99187e+07
Fructose 1,6-bisphosphate	0.703199	B(iii)			569.806	338.989	forward	717571	2.56584e+06	593400	805679	1.05424e+06	968369	917455	3.74429e+06	1.43149e+06	1.13008e+06	2.39944e+06	552358	1.75103e+06	1.33682e+06	3.27193e+06	1.44708e+06	2.51433e+06	1.41069e+06	1.80715e+06	889858	2.35698e+06	1.93327e+06	2.49009e+06	817226	1.28642e+06	1.1953e+06	2.58159e+06	1.49016e+06	1.32412e+06	1.24394e+06	1.33071e+06	2.21587e+06	1.85764e+06	1.98564e+06	1.09369e+06	1.17066e+06	1.37232e+06
6-Phosphogluconic acid	0.698446	B(iii)			484.46	275.018	forward	5.88602e+06	1.09228e+07	1.15148e+07	4.10675e+06	1.16678e+07	4.78385e+06	1.06711e+07	5.55704e+06	4.55789e+06	3.94917e+06	8.27464e+06	5.29914e+06	6.60346e+06	9.29877e+06	4.73293e+06	1.32881e+07	4.20607e+06	6.5869e+06	2.14039e+06	8.83757e+06	4.01291e+06	6.27504e+06	3.18168e+06	2.77562e+06	1.70339e+06	1.0011e+07	3.22342e+06	3.16122e+06	2.98651e+06	3.50522e+06	3.97607e+06	3.45987e+06	3.57306e+06	1.09767e+07	4.57966e+06	8.44762e+06	5.06043e+06
D-Maltose	0.697553	B(iii)			410.63	341.109	forward	1.11342e+06	2.06355e+06	1.81874e+06	4.40468e+06	2.95223e+06	3.47495e+06	1.43197e+06	2.24722e+06	2.14483e+06	4.61512e+06	3.70843e+06	2.53036e+06	7.84001e+06	2.20333e+06	3.11472e+06	9.24911e+06	1.30184e+06	2.14479e+06	5.1834e+06	2.49163e+06	2.17571e+06	5.94526e+06	4.34784e+06	5.54272e+06	1.0252e+07	2.0772e+06	4.2697e+06	6.63673e+06	2.17387e+06	7.45195e+06	1.17739e+06	2.55436e+06	6.14432e+06	4.42852e+06	3.88729e+06	3.92759e+06	4.59627e+06
4,8,12,15-Octadecatetraenoic acid	0.697514	B(iii)			47.7336	277.216	forward	539526	1.35879e+06	682741	755475	703335	1.71912e+06	1.0274e+06	1.01352e+06	1.28036e+06	674227	601104	788903	710893	703133	701137	770755	1.08825e+06	648874	809456	721673	574304	954798	1.01784e+06	568276	4.12731e+06	577586	929501	688057	960407	1.52888e+06	934995	562217	832721	790951	793810	812245	832892
2-(Methylthio)propane	0.697205	B(iii)			369.301	91.0588	forward	6.04129e+06	6.91657e+06	6.03139e+06	7.28275e+06	6.66357e+06	7.02073e+06	7.5688e+06	5.26431e+06	6.8575e+06	5.95101e+06	6.71766e+06	5.44212e+06	5.64358e+06	6.62923e+06	5.38505e+06	7.50961e+06	6.50994e+06	5.98139e+06	5.83261e+06	7.02054e+06	7.03302e+06	6.19393e+06	6.49296e+06	6.4504e+06	5.56824e+06	5.72488e+06	5.57454e+06	6.66435e+06	6.10479e+06	6.47849e+06	5.25852e+06	5.9233e+06	6.16372e+06	3.04004e+06	6.11823e+06	7.85718e+06	6.6343e+06
Thiazole	0.697096	B(iii)			424.111	281.004	forward	2.86844e+06	3.01195e+06	2.46833e+06	1.98995e+06	2.82746e+06	2.39064e+06	1.87738e+06	3.33849e+06	3.26709e+06	1.8205e+06	2.58736e+06	2.66398e+06	3.18373e+06	2.85752e+06	3.09715e+06	3.81444e+06	2.36134e+06	4.09098e+06	1.62084e+06	2.416e+06	2.10888e+06	1.08816e+06	2.31768e+06	897207	525051	929131	2.34275e+06	1.93637e+06	2.32193e+06	2.09332e+06	2.2228e+06	1.9351e+06	2.50142e+06	1.82668e+06	2.60117e+06	2.43654e+06	2.72672e+06
PE(P-18:1(9Z)/20:4(5Z,8Z,11Z,14Z))	0.696991	B(iii)			95.1192	750.545	forward	2.28433e+07	2.70946e+07	2.85425e+07	2.32757e+07	2.8221e+07	3.27916e+07	3.38322e+07	3.62142e+07	1.38697e+07	4.60483e+07	2.48329e+07	1.7693e+07	2.01558e+07	2.72224e+07	3.45682e+07	2.86065e+07	2.4904e+07	2.46617e+07	2.40754e+07	2.90447e+07	3.24557e+07	3.37501e+07	3.11796e+07	4.32214e+07	3.10695e+07	3.9941e+07	2.28323e+07	4.36244e+07	2.50555e+07	2.67122e+07	2.85917e+07	2.00093e+07	3.37983e+07	2.65061e+07	3.48149e+07	2.3735e+07	2.53848e+07
6''-Caffeoylisoorientin	0.696756	B(iii)			227.081	611.138	forward	59925.1	788682	771865	145538	82344.8	1.24816e+06	134801	129843	119596	13984.6	106072	88948.5	379302	0	0	47716.4	2.94852e+06	16559.2	164032	778230	43643.9	433182	951996	0	6.23295e+06	60017.3	914605	0	3.47096e+06	2.57899e+06	1.54487e+06	0	547521	726368	689667	671582	631659
Graveoline	0.696614	B(iii)			411.235	280.092	forward	4.61175e+06	1.63813e+07	9.28927e+06	1.01737e+07	1.66564e+07	1.75112e+07	1.93175e+07	9.54184e+06	2.40391e+07	7.74292e+06	7.23334e+06	1.72103e+07	1.39383e+07	1.73319e+07	1.87023e+07	1.52087e+07	1.25423e+07	1.00028e+07	1.71236e+07	1.59695e+07	2.38014e+07	1.31856e+07	1.6765e+07	1.79527e+07	1.77262e+07	1.21149e+07	1.47973e+07	1.99745e+07	1.63276e+07	2.46677e+07	1.0131e+07	8.37837e+06	1.46686e+07	1.5298e+07	1.57578e+07	1.58065e+07	1.5302e+07
PC(18:0/P-18:1(11Z))	0.692181	B(iii)			105.494	772.622	forward	2.45316e+06	6.73678e+06	4.33902e+06	4.57104e+06	3.93767e+06	4.13409e+06	6.68018e+06	5.27811e+06	2.78199e+06	5.02629e+06	3.43631e+06	1.91544e+06	4.62186e+06	3.3672e+06	3.16096e+06	5.19847e+06	3.76503e+06	7.84002e+06	2.68683e+07	5.06831e+06	7.45138e+06	3.97187e+07	4.46339e+06	4.37741e+06	2.3675e+06	3.41325e+06	3.29606e+06	6.97928e+06	3.04748e+06	4.49929e+06	5.91315e+06	2.17053e+07	8.75124e+06	5.03537e+06	5.59465e+06	1.0743e+07	1.01787e+07
2-Oxovaleric acid	0.691101	B(iii)			199.764	115.039	forward	1.59227e+07	1.52858e+07	1.83511e+07	1.42907e+07	2.05691e+07	1.88555e+07	1.99832e+07	1.76739e+07	1.55801e+07	1.59658e+07	1.59699e+07	2.03243e+07	2.03377e+07	1.99786e+07	1.61121e+07	1.67242e+07	1.43993e+07	1.38738e+07	1.61987e+07	1.69877e+07	1.60977e+07	1.63951e+07	1.93112e+07	1.45159e+07	2.46863e+07	1.85537e+07	1.8325e+07	1.39702e+07	1.3236e+07	3.18565e+07	1.97463e+07	1.83914e+07	1.64543e+07	1.28012e+07	1.39656e+07	1.38686e+07	1.58715e+07
Phthalic acid	0.690834	B(iii)			215.702	165.019	forward	0	7.20098e+06	7.25321e+06	230749	131208	1.65007e+07	1.05898e+06	1.63804e+06	609521	0	0	0	2.28223e+06	0	178122	111251	1.47137e+07	0	1.34812e+06	2.31182e+06	0	5.41987e+06	9.18372e+06	0	3.61056e+07	0	4.80688e+06	0	2.48633e+07	2.03296e+07	2.91103e+07	0	7.77355e+06	7.14665e+06	6.72717e+06	4.18092e+06	6.12117e+06
Urolithin B 3-O-glucuronide	0.690399	B(iii)			424.751	389.079	forward	674801	801903	835388	982870	899870	758570	641054	501467	913803	1.07368e+06	986585	1.08039e+06	1.0323e+06	1.25396e+06	731348	1.19578e+06	732454	562946	894921	843622	996789	840545	876389	1.00243e+06	674387	820497	1.21693e+06	1.07667e+06	874276	1.59214e+06	582282	958292	931924	1.06483e+06	909790	813403	972024
Dehydroascorbic acid	0.690346	B(iii)			152.793	173.008	forward	7.49914e+06	4.93573e+06	5.71478e+06	1.60771e+07	1.08583e+07	1.04262e+07	9.30004e+06	6.40172e+06	3.99682e+06	9.76895e+06	1.21132e+07	1.02902e+07	1.69388e+07	2.00429e+07	1.07547e+07	1.1692e+07	2.81207e+06	5.59948e+06	853696	4.45849e+06	2.18394e+07	7.99075e+06	8.07565e+06	3.45481e+06	1.00421e+07	1.41675e+07	1.69193e+07	1.89136e+07	1.51934e+07	2.16413e+07	7.32303e+06	1.41256e+07	1.16568e+07	1.03665e+07	1.13538e+07	1.05375e+07	1.01938e+07
Dihydrothymine	0.690336	B(iii)			76.4256	129.066	forward	542648	1.20391e+06	951466	898550	838879	901836	775378	978786	934267	778334	793671	833232	1.06435e+06	854658	755151	543489	956492	833730	1.01815e+06	978868	805681	715292	911716	1.018e+06	722921	575274	1.37435e+06	721135	1.48695e+06	952849	806195	815702	540709	1.00265e+06	564344	777682	946002
7-Hydroxyticlopidine	0.688917	B(iii)			277.439	280.056	forward	271538	521856	765925	464908	544562	537686	793292	466806	537019	464525	444255	909110	366916	456537	486608	446170	309352	300078	394560	585593	352717	389958	517749	417754	354416	533095	635848	335023	583642	418415	511386	446313	698197	566879	479463	468660	448640
PC(20:4(8Z,11Z,14Z,17Z)/P-18:0)	0.688226	B(iii)			87.9878	794.607	forward	2.42797e+07	3.24608e+07	3.49551e+07	2.22293e+07	5.44029e+07	4.14253e+07	4.09344e+07	1.0482e+08	1.92456e+07	5.40382e+07	2.31027e+07	1.07956e+07	2.80934e+07	2.44484e+07	4.22352e+07	3.51505e+07	3.05106e+07	3.1856e+07	2.17028e+07	3.38755e+07	3.80449e+07	6.11346e+07	3.66449e+07	2.94525e+07	2.25688e+07	5.45526e+07	2.27893e+07	3.00601e+07	3.93747e+07	3.07731e+07	2.96318e+07	2.37762e+07	4.32025e+07	4.4066e+07	4.17424e+07	3.8794e+07	4.03322e+07
Isobornyl propionate	0.687743	B(iii)			355.496	144.102	forward	3.60108e+07	1.2882e+07	1.63143e+07	1.12746e+07	1.41058e+07	1.92679e+07	1.14542e+07	1.10825e+07	1.25773e+07	1.82284e+07	1.48076e+07	1.92918e+07	1.16452e+07	8.89173e+06	2.13136e+07	3.53266e+07	9.95398e+06	7.80175e+06	1.39426e+07	1.01543e+07	1.16019e+07	1.70512e+07	1.27246e+07	1.05183e+07	9.5691e+06	1.09938e+07	1.12347e+07	1.11426e+07	1.08976e+07	1.14613e+07	1.2694e+07	2.38958e+07	1.63188e+07	1.65259e+07	1.5484e+07	1.61136e+07	1.63887e+07
stearoyl sphingomyelin	0.684299	B(iii)			231.196	731.607	forward	9.05909e+06	1.21012e+06	8.64373e+06	5.76402e+06	900718	1.87868e+07	1.03229e+06	2.34716e+06	824665	9.47678e+06	1.60027e+06	1.40175e+06	8.37049e+06	1.4156e+06	1.26553e+06	1.19748e+06	839884	1.13263e+06	1.01356e+06	644641	1.02289e+06	1.04188e+06	1.26399e+06	1.20575e+06	799724	2.60471e+07	1.02304e+06	838684	1.13172e+06	1.44657e+06	604102	1.83843e+06	781394	642880	825405	722201	815576
LysoPE(18:1(9Z)/0:0)	0.684027	B(iii)			216.805	478.294	forward	278038	305945	237881	313917	392254	436724	358623	222360	477173	194454	256672	402758	362231	409860	424874	230591	297238	303603	341257	428257	508085	273356	226895	329263	2.13912e+06	358038	437519	507493	364820	420749	239565	318240	390231	547803	467888	567725	575279
trans-3,3',4',5,5',7-Hexahydroxyflavanone	0.683646	B(iii)			322.231	321.058	forward	95497.7	319613	245107	2.0723e+06	357954	650071	43886.4	282739	623672	454228	417124	223200	750368	262218	440745	845321	392275	390114	913831	320904	188023	507803	567471	681047	1.11428e+06	290377	603966	637042	248807	869570	177562	256684	320628	477888	587351	604549	741849
DL-2-Aminooctanoic acid	0.682217	B(iii)			245.916	160.133	forward	940442	947165	1.38883e+06	855062	580809	724767	1.03074e+06	986985	727306	919659	729054	1.17965e+06	658265	526796	756233	680758	571868	695126	514621	672154	1.02174e+06	813106	788951	697364	1.16259e+06	1.02282e+06	551412	744001	728151	681212	799058	856714	705633	906233	718735	799224	765089
Racemethionine	0.681223	B(iii)			304.694	148.043	forward	1.31711e+06	1.58912e+06	2.03892e+06	2.47165e+06	5.60964e+06	5.22942e+06	6.26478e+06	4.32711e+06	1.21846e+06	1.89109e+06	2.77525e+06	2.54236e+06	5.81916e+06	2.19526e+06	4.78831e+06	4.63252e+06	2.5864e+06	7.45145e+06	2.47774e+06	1.50676e+06	4.62408e+06	1.98072e+06	1.5477e+06	2.34015e+06	4.64703e+06	7.91243e+06	4.24958e+06	6.90326e+06	5.96729e+06	7.59762e+06	3.06812e+06	1.7209e+06	4.04591e+06	4.68457e+06	4.2904e+06	5.00547e+06	5.21336e+06
PC(18:1(11Z)/14:0)	0.680755	B(iii)			172.048	732.554	forward	7.57583e+07	8.49144e+07	8.638e+07	8.80566e+07	2.48099e+08	1.0715e+08	2.67419e+08	8.53243e+07	2.15484e+08	3.03416e+08	2.4939e+08	3.35778e+08	2.63993e+08	2.36271e+08	2.55783e+08	1.10966e+08	7.01159e+07	8.44364e+07	7.99912e+07	9.75837e+07	9.09072e+07	8.13901e+07	6.93638e+07	7.14234e+07	3.01391e+08	3.03091e+08	3.03995e+08	2.84394e+08	2.83314e+08	2.5781e+08	2.94618e+08	8.0436e+07	1.95522e+08	1.84621e+08	1.77939e+08	1.85515e+08	1.84114e+08
Citramalic acid	0.680165	B(iii)			92.6583	147.029	forward	5.46481e+06	4.99881e+06	4.86888e+06	5.03927e+06	5.67205e+06	3.72731e+06	2.47424e+06	3.97593e+06	3.92453e+06	4.94036e+06	3.77819e+06	4.80115e+06	3.91323e+06	4.88218e+06	2.73798e+06	5.4632e+06	5.24852e+06	1.02801e+07	4.59076e+06	5.48815e+06	4.47969e+06	4.67842e+06	4.93536e+06	4.0941e+06	6.4327e+06	5.13925e+06	3.83336e+06	4.09992e+06	4.25728e+06	4.25448e+06	3.35404e+06	4.91994e+06	4.62021e+06	4.75454e+06	4.33999e+06	3.88141e+06	4.18255e+06
1-Isopropyl citrate	0.680084	B(iii)			239.453	235.083	forward	938220	944641	1.02114e+06	884138	849145	1.01002e+06	669407	1.24473e+06	661260	1.47353e+06	1.0312e+06	1.15194e+06	1.1328e+06	918371	1.25768e+06	889446	1.18478e+06	708063	896216	1.23835e+06	567463	1.1895e+06	774883	915017	810931	1.31264e+06	1.21367e+06	763568	985641	1.18052e+06	987210	1.35144e+06	860952	968963	1.13388e+06	1.2449e+06	1.30308e+06
Prednisolone	0.679749	B(iii)			282.364	361.21	forward	719744	1.22805e+06	1.32063e+06	560322	1.07516e+06	495527	562169	1.43984e+06	779928	908590	460896	366750	820060	137687	1.12029e+06	1.06239e+06	500938	1.04566e+06	1.24999e+06	772722	804284	597861	1.11055e+06	844668	427452	627979	715447	528846	1.04112e+06	784204	763016	759105	1.11354e+06	967673	1.11595e+06	582370	639130
PC(16:0/P-16:0)	0.676993	B(iii)			170.829	718.575	forward	1.06779e+07	1.15856e+07	9.47125e+06	1.26971e+07	1.32943e+07	7.47094e+06	2.1158e+07	1.42619e+07	2.29255e+07	2.57365e+07	1.51156e+07	1.60485e+07	1.61802e+07	3.28007e+07	1.47191e+07	1.15429e+07	8.77866e+06	1.00012e+07	9.88675e+06	1.1185e+07	1.38302e+07	1.57268e+07	7.93271e+06	7.29507e+06	1.34897e+07	1.65778e+07	1.72339e+07	2.18154e+07	1.38303e+07	1.80712e+07	1.59393e+07	9.80293e+06	1.50104e+07	1.52806e+07	1.61539e+07	1.53681e+07	1.55713e+07
(Z,Z)-2,9,16-Heptadecatriene-4,6-diyn-8-ol	0.673981	B(iii)			316.542	243.171	forward	381368	585111	638470	612620	484894	336719	386379	451259	374864	563257	462670	829718	230287	168980	452842	450692	390388	595141	362776	397598	387746	378644	329569	229563	372597	528093	592976	459631	501828	613746	308629	256844	384004	497934	319842	597891	502283
7-Aminonitrazepam	0.673739	B(iii)			332.5	252.109	forward	2.29243e+06	2.72743e+06	3.27066e+06	2.97207e+06	1.58649e+06	3.78332e+06	2.92283e+06	573757	2.17405e+06	5.78433e+06	5.23704e+06	5.39008e+06	2.24134e+06	4.02426e+06	1.11739e+06	2.06464e+06	2.83777e+06	1.98749e+06	2.38001e+06	3.90324e+06	2.89386e+06	5.21787e+06	3.33624e+06	2.60656e+06	5.42121e+06	3.03517e+06	3.99367e+06	2.75476e+06	3.02275e+06	5.47027e+06	1.86594e+06	2.98352e+06	2.75756e+06	3.74134e+06	2.64227e+06	3.33966e+06	3.1401e+06
(Â±)-Glycerol 1,2-diacetate	0.67188	B(iii)			238.401	177.077	forward	1.23501e+07	1.3612e+07	1.70494e+07	1.0141e+07	5.69232e+07	1.27576e+07	1.1325e+07	6.2152e+07	1.1923e+07	1.23153e+07	9.4783e+06	8.9409e+06	1.17094e+07	1.34127e+07	1.50525e+07	1.14511e+07	1.55694e+07	1.16188e+07	1.6238e+07	1.29678e+07	1.36511e+07	7.37261e+06	1.75005e+07	1.5667e+07	1.0827e+07	1.39805e+07	1.07774e+07	1.19573e+07	1.10942e+07	1.226e+07	6.21821e+07	1.31202e+07	7.52854e+06	1.27805e+07	5.36377e+07	3.40319e+07	1.32465e+07
4-O-Methyl-a-D-glucosyl-(1->2)-b-D-xylosyl-(1->4)-D-xylose	0.671757	B(iii)			73.0461	473.145	forward	26580	625141	579859	60189.5	40431	1.61069e+06	36290.1	89659.8	55258.2	0	10999.4	11328.5	300459	9296.43	9797.38	0	1.5718e+06	0	133993	542927	0	428469	816996	7356.2	3.51212e+06	0	405216	0	2.47965e+06	1.79103e+06	1.66382e+06	0	350266	653495	375975	595928	693728
Cincassiol B	0.671086	B(iii)			426.362	401.215	forward	1.89594e+06	1.39609e+06	2.6113e+06	2.07295e+06	1.3037e+06	1.42892e+06	1.19329e+06	2.86416e+06	2.45361e+06	1.97299e+06	1.95865e+06	1.45866e+06	1.49575e+06	3.23386e+06	1.80714e+06	2.25792e+06	1.83928e+06	1.57229e+06	2.63001e+06	1.79894e+06	1.72875e+06	1.5304e+06	1.85568e+06	1.57398e+06	1.21241e+06	2.14575e+06	915649	1.03193e+06	1.05986e+06	1.48703e+06	1.5328e+06	1.20976e+06	1.2542e+06	2.11923e+06	1.99601e+06	2.07749e+06	2.29681e+06
Dexamethasone	0.669284	B(iii)			483.818	433.196	forward	820372	1.86352e+06	2.27919e+06	1.17355e+06	1.44577e+06	1.33081e+06	1.13815e+06	1.89964e+06	1.73755e+06	1.54263e+06	643659	279352	1.2065e+06	1.45065e+06	1.6842e+06	1.27578e+06	1.50459e+06	1.06147e+06	3.12705e+06	1.04521e+06	2.6292e+06	2.28543e+06	2.30933e+06	3.32491e+06	1.62012e+06	2.19705e+06	1.51538e+06	1.80403e+06	1.6489e+06	1.70643e+06	1.36014e+06	1.15499e+06	1.5359e+06	1.36912e+06	1.44672e+06	1.62669e+06	1.47913e+06
Oxoglutaric acid	0.668193	B(iii)			365.54	145.013	forward	6.93831e+07	1.37263e+08	9.82172e+07	1.61659e+08	1.09532e+08	1.19272e+08	7.09567e+06	7.03909e+07	1.72465e+08	7.97958e+07	8.97738e+07	9.36899e+07	1.37814e+08	1.72048e+08	1.38478e+08	9.32849e+07	4.13395e+07	4.89947e+07	6.53724e+07	1.10445e+08	1.75086e+08	8.49691e+07	1.04974e+08	1.35725e+08	6.91735e+07	7.49247e+07	1.38061e+08	1.26971e+08	1.22771e+08	1.10014e+08	4.69642e+07	6.20959e+07	1.14465e+08	1.23054e+08	1.21721e+08	1.26552e+08	1.24665e+08
Molybdopterin precursor Z	0.667919	B(iii)			469.512	346.055	forward	5.1126e+07	3.58679e+07	6.94656e+07	6.17701e+07	3.66433e+07	6.31368e+07	6.60256e+07	2.88138e+07	4.12822e+07	6.21707e+07	6.52939e+07	7.38832e+07	4.94001e+07	5.19151e+07	4.61627e+07	3.96043e+07	6.46287e+07	4.50555e+07	6.39205e+07	6.47226e+07	5.36114e+07	6.30127e+07	4.78513e+07	6.21872e+07	5.5764e+07	5.8422e+07	4.41845e+07	5.39214e+07	5.19347e+07	5.33734e+07	6.18507e+07	5.357e+07	4.85606e+07	5.91968e+07	5.86667e+07	4.46588e+07	4.58015e+07
2-Ketobutyric acid	0.667907	B(iii)			96.0846	101.023	forward	3.61881e+06	7.62206e+06	0	0	1.4188e+07	1.89948e+07	2.10297e+07	1.79115e+07	1.78452e+06	0	0	0	1.18963e+07	1.60976e+06	1.7226e+07	9.53743e+06	0	1.00376e+07	1.73292e+06	0	1.87138e+06	0	3.80809e+06	1.33746e+07	9.61189e+06	1.70921e+06	0	1.01385e+07	0	6.27029e+06	4.36914e+07	1.66053e+07	3.85257e+06	3.6118e+06	7.8295e+06	7.29817e+06	1.37399e+07
PC(20:2(11Z,14Z)/14:0)	0.666338	B(iii)			147.073	758.566	forward	4.58639e+09	4.43333e+09	5.14691e+09	4.74264e+09	3.39559e+09	3.55075e+09	4.24912e+09	4.28801e+09	2.9162e+09	3.13197e+09	3.94341e+09	3.14951e+09	3.31508e+09	3.5629e+09	4.23356e+09	3.62615e+09	4.8796e+09	4.23934e+09	4.31497e+09	4.37422e+09	4.64773e+09	3.92165e+09	4.45239e+09	4.50107e+09	2.27614e+09	3.27149e+09	2.5787e+09	3.47558e+09	2.95185e+09	2.86002e+09	2.81393e+09	3.95909e+09	3.55074e+09	4.63017e+09	4.31919e+09	4.40203e+09	3.65515e+09
Uridine 5'-monophosphate	0.663939	B(iii)			449.84	323.029	forward	369971	356651	1.72405e+06	3.65917e+06	714805	1.08697e+06	272953	144873	195304	1.0972e+06	348926	2.71744e+06	712679	1.77505e+06	231679	462034	1.02644e+06	2.38299e+06	1.45008e+06	1.18325e+06	1.05017e+06	591330	1.06442e+06	1.16921e+06	768777	248255	867194	1.27169e+06	556588	1.51682e+06	376072	1.27808e+06	967612	1.13888e+06	1.17622e+06	1.20549e+06	1.24152e+06
Dukunolide B	0.662644	B(iii)			277.627	499.157	forward	127772	275251	261917	99063.3	182399	114497	212277	130564	101040	166860	111054	363276	105378	86494.6	97458.5	169838	139983	43846.9	30083.6	188743	120862	128866	142316	75321.1	75262	184948	235329	92685.1	241511	145967	188474	206493	210550	159283	145771	123572	102958
Diphenylamine	0.661538	B(iii)			211.883	170.092	forward	2.53004e+07	8.30058e+06	8.6639e+06	1.51401e+07	1.08756e+07	1.37289e+07	1.57484e+07	1.32844e+07	6.03376e+06	1.29667e+07	2.49625e+07	2.76604e+07	1.69439e+07	1.59149e+07	1.29826e+07	8.75027e+06	1.22137e+07	2.20254e+07	7.41668e+06	1.80623e+07	7.48285e+06	1.04052e+07	7.72253e+06	8.61809e+06	9.18285e+06	7.27085e+06	9.17886e+06	1.64728e+07	9.68018e+06	8.17026e+06	1.69399e+07	1.9202e+07	7.22828e+06	1.50993e+07	1.29583e+07	1.27262e+07	1.20894e+07
Benzidine	0.658172	B(iii)			450.402	185.103	forward	915252	3.34242e+06	1.70803e+06	1.48385e+06	1.99872e+06	2.12844e+06	1.79392e+06	2.19226e+06	2.05676e+06	1.67824e+06	1.52926e+06	1.57886e+06	1.55283e+06	1.74419e+06	1.92467e+06	1.80586e+06	1.64078e+06	1.53772e+06	1.968e+06	1.73842e+06	2.24046e+06	1.88893e+06	1.99932e+06	2.13816e+06	1.38656e+06	2.55877e+06	1.69903e+06	1.71646e+06	1.76996e+06	1.72228e+06	2.05027e+06	1.52056e+06	1.97165e+06	2.69714e+06	1.88185e+06	1.76563e+06	1.55391e+06
Mangiferdesmethylursanone	0.657882	B(iii)			29.4433	429.373	forward	1.11886e+07	1.91056e+07	1.30687e+07	1.03383e+07	6.30488e+06	2.43084e+07	7.41983e+06	2.03983e+07	1.47422e+07	1.17669e+07	5.94584e+06	4.76555e+06	5.13487e+06	1.68978e+07	1.7023e+07	8.36836e+06	8.47173e+06	7.41792e+06	2.64199e+07	1.04764e+07	9.65727e+06	1.70483e+07	1.46209e+07	6.8614e+06	3.80473e+06	1.05366e+07	8.55572e+06	5.49046e+06	1.15665e+07	1.51322e+07	1.08981e+07	1.06696e+07	7.45552e+06	9.939e+06	8.09499e+06	8.25352e+06	7.03882e+06
Diethyl tartrate	0.656927	B(iii)			177.732	207.088	forward	1.1723e+07	6.02825e+06	9.71047e+06	9.18455e+06	8.93188e+06	9.22492e+06	5.13342e+06	8.73622e+06	7.62506e+06	1.0414e+07	1.10516e+07	1.07877e+07	7.84244e+06	7.39643e+06	8.29761e+06	8.38856e+06	1.21886e+07	7.22369e+06	8.46878e+06	1.07782e+07	5.92851e+06	8.66373e+06	7.21273e+06	5.82672e+06	1.03621e+07	9.34854e+06	8.18033e+06	6.41375e+06	9.02948e+06	8.57059e+06	1.14104e+07	1.27251e+07	8.87473e+06	8.50513e+06	7.61786e+06	7.62009e+06	7.67474e+06
PC(18:3(6Z,9Z,12Z)/18:0)	0.656384	B(iii)			167.44	784.584	forward	7.64906e+08	4.7754e+08	6.30649e+08	6.54027e+08	4.88394e+08	9.174e+08	3.89916e+08	6.4386e+08	2.92047e+08	3.72793e+08	3.89238e+08	4.56033e+08	3.46183e+08	3.48635e+08	3.98261e+08	4.58991e+08	7.50449e+08	8.32991e+08	5.80132e+08	6.92781e+08	5.8844e+08	6.26226e+08	6.92044e+08	5.23875e+08	4.25884e+08	4.43841e+08	3.79478e+08	3.75446e+08	4.12661e+08	4.32815e+08	4.37471e+08	6.72253e+08	5.41651e+08	5.41819e+08	5.4768e+08	4.8322e+08	5.42241e+08
PC(18:2(9Z,12Z)/P-18:1(11Z))	0.656285	B(iii)			101.367	768.592	forward	5.8394e+07	5.39275e+07	6.93385e+07	3.75216e+07	3.53564e+07	4.94635e+07	1.47055e+08	5.84277e+07	1.00412e+08	8.53879e+07	8.36635e+07	9.90036e+07	6.07095e+07	1.47574e+08	7.64974e+07	8.2494e+07	1.42418e+08	3.58207e+07	6.7369e+07	4.77489e+07	5.77343e+07	9.97996e+07	5.09809e+07	4.76348e+07	2.71025e+07	3.60685e+07	1.36775e+08	4.32108e+07	5.28779e+07	1.57004e+08	3.97579e+07	2.07753e+08	5.05011e+07	5.75827e+07	5.77115e+07	4.31995e+07	4.49027e+07
O-Phosphothreonine	0.655325	B(iii)			454.623	200.032	forward	3.04289e+06	2.8069e+06	2.15355e+06	1.40498e+06	2.71262e+06	1.96514e+06	1.49494e+06	3.08926e+06	2.91614e+06	1.52418e+06	1.86059e+06	2.65049e+06	2.34007e+06	2.45651e+06	3.06496e+06	3.43091e+06	1.63493e+06	3.41809e+06	1.4389e+06	2.06118e+06	1.85231e+06	792011	1.67994e+06	1.40588e+06	133690	1.50391e+06	2.27115e+06	602888	1.90786e+06	2.20625e+06	2.22554e+06	2.64769e+06	2.34194e+06	2.13412e+06	2.36838e+06	2.82715e+06	2.24192e+06
2,4,6-Triethyl-1,3,5-oxadithiane	0.654994	B(iii)			155.141	207.088	forward	3.14361e+07	2.48211e+07	2.8488e+07	2.09478e+07	2.86252e+07	2.63152e+07	1.29885e+07	2.96834e+07	2.2535e+07	1.50225e+07	2.3754e+07	1.33906e+07	1.17439e+07	2.01117e+07	3.12998e+07	2.58358e+07	3.3032e+07	1.4556e+07	2.60024e+07	1.73571e+07	1.99819e+07	2.44137e+07	2.5735e+07	1.27298e+07	2.11017e+07	2.63118e+07	1.23321e+07	9.52513e+06	1.1612e+07	1.23888e+07	1.74243e+07	2.9655e+07	2.83387e+07	2.95294e+07	1.40339e+07	2.89897e+07	1.33881e+07
Mannitol	0.653344	B(iii)			173.917	181.071	forward	4.4632e+06	4.42813e+06	4.2445e+06	3.32014e+06	4.44931e+06	980842	2.58588e+06	2.29421e+06	903565	3.03444e+06	2.7364e+06	4.09243e+06	3.71412e+06	2.42196e+06	1.51586e+06	3.21979e+06	4.22418e+06	4.50183e+06	0	3.31532e+06	3.13522e+06	2.56892e+06	2.35968e+06	2.91022e+06	4.86534e+06	5.14959e+06	4.38598e+06	4.80467e+06	4.22246e+06	3.15439e+06	2.3157e+06	2.93226e+06	3.88759e+06	3.40526e+06	3.39317e+06	3.99843e+06	3.68763e+06
Dihydrolipoate	0.651975	B(iii)			69.1915	207.051	forward	9.08822e+06	1.09202e+07	8.1616e+06	6.94857e+06	7.68266e+06	9.05408e+06	5.63448e+06	1.07444e+07	9.32848e+06	1.12509e+07	1.00037e+07	1.38183e+07	1.4313e+07	1.2792e+07	6.62618e+06	9.25499e+06	1.31402e+07	1.38667e+07	1.01342e+07	1.11306e+07	1.07889e+07	1.42833e+07	1.20135e+07	1.26066e+07	1.69811e+07	1.06713e+07	1.01925e+07	1.2321e+07	1.04606e+07	1.39565e+07	8.97178e+06	1.2449e+07	1.09161e+07	7.15355e+06	9.73317e+06	6.5959e+06	1.01768e+07
Sinapic acid	0.651209	B(iii)			73.184	223.061	forward	1.27921e+06	4.64823e+06	3.27154e+06	1.11589e+06	1.04948e+06	1.19563e+07	1.66264e+06	1.36981e+06	1.19047e+06	1.32905e+06	1.2188e+06	1.55753e+06	1.3165e+06	1.15755e+06	1.3991e+06	1.42602e+06	1.17962e+07	1.30988e+06	2.26228e+06	3.47324e+06	959899	2.22438e+06	3.30777e+06	1.3581e+06	1.42897e+07	1.26589e+06	5.24212e+06	1.50339e+06	1.71236e+07	1.25795e+07	6.31539e+06	1.30063e+06	3.23614e+06	3.582e+06	3.31312e+06	3.09108e+06	3.10986e+06
(3S,7E,9S)-9-Hydroxy-4,7-megastigmadien-3-one 9-glucoside	0.648884	B(iii)			355.475	371.204	forward	1.20442e+06	1.25436e+06	1.80237e+06	1.04169e+06	1.05959e+06	1.25861e+06	976714	1.93934e+06	1.05718e+06	1.23381e+06	968264	1.011e+06	824817	1.51825e+06	1.50911e+06	1.15719e+06	1.58047e+06	714293	1.54291e+06	1.08961e+06	1.02903e+06	1.23048e+06	1.16629e+06	1.10365e+06	805239	1.32066e+06	606404	652872	705001	748759	1.53677e+06	1.20629e+06	978469	1.12894e+06	1.04754e+06	1.01436e+06	1.15612e+06
1-Methylinosine	0.648676	B(iii)			315.39	283.104	forward	7.23199e+06	8.31174e+06	1.17927e+07	5.88986e+06	1.87848e+07	7.13942e+06	7.51091e+06	6.56485e+06	5.73909e+06	1.21436e+07	5.91538e+06	5.83586e+06	5.03071e+06	7.69977e+06	8.68077e+06	8.39008e+06	6.73101e+06	6.11117e+06	7.94626e+06	6.11209e+06	6.517e+06	1.11829e+07	9.27216e+06	7.27827e+06	1.09165e+07	1.03977e+07	8.67052e+06	8.20331e+06	1.01052e+07	1.25833e+07	6.04297e+06	6.81756e+06	7.42209e+06	8.34121e+06	8.8063e+06	7.42176e+06	7.83809e+06
DG(16:0/16:0/0:0)	0.648224	B(iii)			29.4812	591.5	forward	176844	314073	207230	268202	331410	537746	209101	229831	639748	229367	233684	294849	283035	339678	155519	151109	480708	217362	303236	384007	267008	518831	278391	216459	1.79763e+06	184381	573931	303848	453417	630616	286842	478274	389665	98765.1	59641.6	419471	233813
Dehydroanonaine	0.647846	B(iii)			211.81	264.108	forward	3.0564e+06	2.27955e+06	4.62747e+06	3.63962e+06	4.52044e+06	6.31984e+06	4.18827e+06	4.31141e+06	6.1883e+06	3.57714e+06	3.54196e+06	2.13931e+06	3.49248e+06	4.44909e+06	5.48761e+06	2.43639e+06	2.04557e+06	1.55789e+06	3.7488e+06	2.19287e+06	2.33637e+06	2.50538e+06	4.56242e+06	3.38688e+06	3.20601e+06	3.80401e+06	2.95491e+06	2.61844e+06	2.61128e+06	2.89009e+06	2.51699e+06	2.61527e+06	3.08221e+06	6.66002e+06	3.26642e+06	3.42917e+06	3.51424e+06
Sulfamethoxazole N4-hydroxylamine	0.647823	B(iii)			284.375	270.06	forward	2.57887e+06	1.51797e+06	2.69081e+06	2.34744e+06	1.00884e+06	3.06683e+06	1.35785e+06	1.34249e+06	1.56679e+06	2.10591e+06	2.13283e+06	3.1186e+06	1.87161e+06	2.33595e+06	1.68306e+06	1.99148e+06	1.92248e+06	2.33722e+06	1.64797e+06	2.09374e+06	1.50335e+06	1.81034e+06	1.58496e+06	1.88559e+06	1.0516e+06	1.95327e+06	1.97922e+06	910261	1.87533e+06	1.11152e+06	2.06332e+06	2.43459e+06	1.74414e+06	1.18338e+06	2.38524e+06	1.83059e+06	3.2847e+06
7,8-Dihydroneopterin	0.647264	B(iii)			432.752	254.09	forward	6.92237e+06	7.93533e+06	9.11043e+06	6.74349e+06	8.13078e+06	7.91513e+06	7.19798e+06	9.25175e+06	7.36424e+06	7.61976e+06	6.45611e+06	5.68928e+06	6.80504e+06	7.71293e+06	8.26852e+06	7.4798e+06	8.78027e+06	7.85169e+06	8.78586e+06	7.39545e+06	7.86123e+06	8.10897e+06	8.47399e+06	8.16535e+06	7.16991e+06	8.52112e+06	7.05715e+06	6.66053e+06	7.39701e+06	7.07098e+06	8.70876e+06	7.68834e+06	8.26402e+06	7.48344e+06	8.0731e+06	7.93781e+06	7.73696e+06
Resolvin D1	0.646723	B(iii)			447.987	359.229	forward	2.13254e+06	3.85614e+06	1.54009e+06	2.72705e+06	2.47019e+06	1.93815e+06	2.94576e+06	1.6463e+06	4.6306e+06	1.92112e+06	1.37104e+06	0	1.75804e+06	1.63503e+06	1.61665e+06	1.23321e+06	1.08067e+06	1.94371e+06	1.09349e+06	1.59532e+06	1.66068e+06	2.43074e+06	1.85107e+06	3.40755e+06	1.99009e+06	1.93789e+06	2.61655e+06	2.56644e+06	2.54769e+06	1.5582e+06	894406	1.31921e+06	1.90467e+06	2.02695e+06	2.14724e+06	2.29709e+06	2.34633e+06
N-Lactoyl ethanolamine	0.646015	B(iii)			370.401	134.081	forward	7.99579e+07	7.7859e+07	8.33899e+07	7.99506e+07	7.77889e+07	8.33639e+07	7.81065e+07	7.88498e+07	7.1332e+07	7.61784e+07	7.54415e+07	7.87956e+07	7.39443e+07	7.87917e+07	7.58498e+07	8.1683e+07	7.57858e+07	8.31599e+07	7.57654e+07	8.10655e+07	7.40086e+07	7.86462e+07	7.63269e+07	7.42074e+07	6.94214e+07	7.82935e+07	7.35157e+07	7.82147e+07	7.93398e+07	7.22236e+07	7.61671e+07	7.84893e+07	7.6826e+07	8.22017e+07	7.87353e+07	8.04654e+07	7.89506e+07
Biopterin	0.645433	B(iii)			322.745	236.079	forward	1.22983e+07	1.40163e+07	1.73096e+07	9.74413e+06	1.31571e+07	1.26963e+07	1.11461e+07	1.53305e+07	1.23785e+07	1.21046e+07	8.99047e+06	9.12944e+06	9.46691e+06	1.21573e+07	1.41436e+07	1.17368e+07	1.39665e+07	1.18816e+07	1.56604e+07	1.07139e+07	1.22357e+07	1.28273e+07	1.42166e+07	1.30003e+07	1.0196e+07	1.44203e+07	1.05694e+07	9.83971e+06	1.15063e+07	1.1918e+07	1.4295e+07	1.33736e+07	1.33477e+07	1.32287e+07	1.22796e+07	1.22287e+07	1.19991e+07
SM(d18:1/18:1(9Z))	0.644968	B(iii)			203.667	729.591	forward	5.74134e+07	5.20581e+07	5.71516e+07	6.7606e+07	6.59152e+07	6.15543e+07	4.1661e+07	5.82882e+07	5.52874e+07	7.93378e+07	6.537e+07	6.57779e+07	5.74339e+07	6.62428e+07	5.02085e+07	6.60198e+07	5.12146e+07	5.47256e+07	6.07649e+07	5.3048e+07	6.3947e+07	6.37927e+07	5.91956e+07	6.38567e+07	4.33776e+07	6.6129e+07	4.69748e+07	6.95541e+07	5.3995e+07	6.7116e+07	4.1859e+07	6.6513e+07	6.4612e+07	6.23501e+07	6.16324e+07	5.81804e+07	5.98995e+07
Carbofuran	0.642627	B(iii)			588.866	222.113	forward	1.04252e+07	3.52318e+06	3.90109e+06	3.8523e+06	2.00955e+06	1.21123e+07	3.77131e+06	3.64618e+06	2.80901e+06	1.92232e+06	3.8585e+06	3.89832e+06	4.07118e+06	3.5243e+06	3.73808e+06	3.73408e+06	2.06946e+06	3.67922e+06	3.24021e+06	2.49016e+06	3.6821e+06	6.96666e+06	3.73795e+06	3.50973e+06	3.93984e+06	3.74007e+06	8.53187e+06	5.55677e+06	4.02609e+06	2.26158e+06	3.58465e+06	4.07096e+06	3.98462e+06	4.03345e+06	4.01456e+06	4.03724e+06	3.9449e+06
4-Methyl-1-phenyl-2-pentanone	0.641189	B(iii)			496.234	177.123	forward	6.61247e+06	2.56173e+07	1.30364e+07	7.57066e+07	1.07836e+07	1.68028e+07	5.37865e+07	1.5157e+07	7.95369e+07	5.29888e+07	1.67903e+07	4.21368e+07	1.63319e+07	2.41842e+07	2.39719e+07	1.11739e+07	1.12378e+07	7.56296e+07	2.15215e+07	2.71232e+07	3.46222e+07	1.37988e+07	1.64483e+07	7.0944e+07	1.16795e+07	1.68379e+07	1.64577e+07	7.53007e+07	5.0067e+07	2.29996e+07	5.68911e+07	2.67574e+07	1.56266e+07	1.54488e+07	3.8945e+07	2.00028e+07	1.4672e+07
PC(22:5(7Z,10Z,13Z,16Z,19Z)/20:1(11Z))	0.639029	B(iii)			160.716	862.632	forward	143958	102053	173438	115629	1.05586e+06	552063	446297	206982	384888	889953	983396	958210	851548	443750	774017	165124	565279	587208	192803	223623	519990	580036	162959	436201	3.2846e+06	933620	1.28582e+06	1.13157e+06	1.73126e+06	1.34464e+06	1.25805e+06	367705	732698	841559	874320	970009	767251
2,3-Dihydro-6-methoxy-2,2-dimethyl-4H-1-benzopyran-4-one	0.637324	B(iii)			354.318	207.099	forward	2.48673e+06	3.96698e+06	4.11636e+06	2.64957e+06	4.02171e+06	4.10256e+06	3.68042e+06	3.89693e+06	3.46959e+06	3.20092e+06	2.27841e+06	3.04024e+06	3.214e+06	3.09644e+06	4.26775e+06	3.71199e+06	4.4598e+06	3.08613e+06	4.78033e+06	3.11817e+06	3.89847e+06	3.34902e+06	3.86267e+06	5.11142e+06	3.42925e+06	3.87822e+06	2.52097e+06	3.48101e+06	3.56403e+06	5.74191e+06	4.62183e+06	2.94291e+06	2.88638e+06	3.48869e+06	3.65023e+06	3.53259e+06	3.58417e+06
5-Hydroxy-7-methoxy-2-tritriacontyl-4H-1-benzopyran-4-one	0.635304	B(iii)			55.789	655.567	forward	485348	591174	395791	218607	195603	378825	35333.1	695654	196475	151904	75211.4	112833	53423.5	124568	93297.9	178078	451057	656594	371362	585515	545458	365693	324927	331642	104028	154281	220497	90579.9	177654	49663	92728.7	558974	212151	267886	246829	121247	240584
Acetylcholine	0.634427	B(iii)			227.657	146.118	forward	1.67594e+06	1.07562e+06	719749	413724	978251	1.12116e+06	1.36911e+06	969134	897395	418568	730684	723357	760533	392721	1.13913e+06	1.02923e+06	491791	583189	520607	936838	804103	529437	723539	1.98674e+06	932630	1.18655e+06	366385	2.85088e+06	1.57458e+06	621522	292740	839446	920262	1.06472e+06	930317	922616	975250
Alanyl-Arginine	0.632323	B(iii)			439.01	246.145	forward	5.01404e+06	165085	2.6827e+06	1.31643e+06	205821	388825	334111	4.67345e+06	3.55722e+06	1.90713e+06	3.5107e+06	4.65222e+06	2.49997e+06	7.79945e+06	21499.4	362418	1.24319e+06	417550	233004	4.66177e+06	558405	2.54602e+06	1.28568e+06	0	2.02586e+06	2.91072e+06	564080	3.08834e+06	665305	2.45167e+06	1.81842e+06	151055	2.46291e+06	1.89252e+06	1.79543e+06	2.16055e+06	2.24744e+06
Ethyl glucuronide	0.631272	B(iii)			313.181	223.083	forward	2.72065e+06	2.88621e+06	4.88931e+06	3.16716e+06	2.77493e+06	3.74653e+06	3.58769e+06	2.57222e+06	2.57649e+06	4.40295e+06	2.7851e+06	2.65925e+06	2.27678e+06	2.87353e+06	3.27244e+06	3.08513e+06	3.18878e+06	3.21515e+06	4.55006e+06	2.00789e+06	3.32818e+06	4.02116e+06	3.36465e+06	3.30306e+06	4.09479e+06	3.7417e+06	3.07183e+06	3.90404e+06	3.41442e+06	3.86013e+06	3.52579e+06	2.68137e+06	2.30932e+06	3.73694e+06	2.87625e+06	2.28462e+06	3.20245e+06
4-Methylumbelliferyl acetate	0.631108	B(iii)			390.678	219.064	forward	4.70176e+07	5.27546e+07	6.04778e+07	4.94154e+07	5.00221e+07	4.82693e+07	3.97024e+07	6.46786e+07	4.48426e+07	4.93054e+07	3.7726e+07	3.39454e+07	4.86357e+07	5.43886e+07	5.54545e+07	5.08139e+07	5.155e+07	4.9447e+07	6.43489e+07	4.30556e+07	5.39676e+07	5.31947e+07	6.1273e+07	6.32878e+07	4.16738e+07	5.93901e+07	4.93274e+07	4.66905e+07	4.53745e+07	5.99295e+07	4.94773e+07	4.49354e+07	5.36649e+07	5.01467e+07	5.19859e+07	5.07114e+07	5.48315e+07
Epidermin	0.630051	B(iii)			408.962	262.128	forward	2.05071e+08	4.46513e+08	4.0487e+08	2.11132e+08	3.47999e+08	2.56242e+08	5.77671e+08	2.13305e+08	2.92328e+08	1.87506e+08	2.50029e+08	2.26065e+08	4.56061e+08	1.99947e+08	1.72266e+08	3.18801e+08	3.41098e+08	1.93228e+08	2.82099e+08	2.13021e+08	2.66084e+08	1.89813e+08	3.15203e+08	5.33304e+08	1.9473e+08	2.67389e+08	3.15746e+08	2.64674e+08	2.2392e+08	1.76664e+08	2.44352e+08	1.61129e+08	2.64662e+08	2.79652e+08	2.67974e+08	3.047e+08	2.87742e+08
PC(18:4(6Z,9Z,12Z,15Z)/P-18:1(11Z))	0.629673	B(iii)			125.978	764.558	forward	1.04765e+07	8.33494e+06	1.04008e+07	7.5418e+06	4.34022e+07	8.9524e+06	2.48529e+08	1.09795e+07	2.18155e+08	2.30006e+08	8.26316e+07	1.15243e+08	5.89657e+07	2.28247e+08	2.1563e+08	3.7172e+07	9.51737e+06	1.00444e+07	1.05085e+07	6.129e+06	8.74592e+06	1.19066e+07	1.17442e+07	1.03821e+07	8.4804e+07	2.09346e+08	3.70263e+07	1.3573e+08	1.11945e+08	1.00334e+08	8.00109e+07	9.44061e+06	9.8135e+07	9.58663e+07	3.48396e+07	2.34951e+07	9.62096e+07
1,8-Octanedithiol	0.629322	B(iii)			355.488	179.093	forward	5.47656e+06	7.56884e+06	8.87551e+06	5.57409e+06	7.93237e+06	7.79649e+06	6.22508e+06	9.08955e+06	6.98215e+06	6.55767e+06	4.32852e+06	3.76161e+06	5.34566e+06	6.97221e+06	8.50641e+06	6.45541e+06	8.76955e+06	5.06832e+06	1.03905e+07	5.77637e+06	8.00612e+06	7.27331e+06	7.92553e+06	9.6492e+06	9.76946e+06	8.51173e+06	2.72484e+06	6.15024e+06	6.66186e+06	6.43634e+06	7.80943e+06	5.55853e+06	5.41652e+06	7.53373e+06	7.87522e+06	7.14936e+06	8.44873e+06
Theaflavin	0.629037	B(iii)			428.023	563.124	forward	1.60745e+06	1.86696e+06	2.34039e+06	2.97237e+06	2.83335e+06	2.25089e+06	3.24905e+06	1.52465e+06	1.29761e+06	1.91337e+06	2.41833e+06	1.21026e+06	1.90539e+06	4.02378e+06	1.75735e+06	2.77344e+06	1.40124e+06	1.05366e+06	2.20637e+06	1.97858e+06	3.10556e+06	1.8389e+06	2.29823e+06	2.49394e+06	951282	2.05426e+06	1.2435e+06	2.30696e+06	2.39252e+06	1.35343e+06	916901	1.07154e+06	1.99647e+06	2.1472e+06	2.49055e+06	2.40017e+06	2.55732e+06
3-Isopropylmalate	0.628524	B(iii)			268.523	177.077	forward	5.35975e+06	5.40378e+06	5.35426e+06	4.7442e+06	5.08665e+06	5.33204e+06	4.87318e+06	7.93904e+06	5.43192e+06	5.87064e+06	4.80842e+06	4.63514e+06	4.74206e+06	5.48165e+06	4.2993e+06	4.52759e+06	5.90016e+06	5.11565e+06	6.14331e+06	4.93232e+06	5.30059e+06	9.29787e+06	8.6171e+06	5.46018e+06	5.79643e+06	6.02971e+06	4.65284e+06	4.9628e+06	5.21873e+06	5.43861e+06	7.23718e+06	5.28495e+06	3.05622e+06	5.73899e+06	3.3515e+06	3.6412e+06	5.03987e+06
Arginyl-Valine	0.628206	B(iii)			546.114	274.187	forward	6.57954e+07	4.58035e+07	8.57631e+07	9.25442e+07	4.6146e+07	6.56355e+07	2.54854e+07	9.41763e+07	6.97059e+07	4.43103e+07	6.66493e+07	6.44664e+07	3.47723e+07	9.31224e+07	5.74628e+07	5.46738e+07	6.72748e+07	3.17996e+07	4.66307e+07	5.83647e+07	4.7919e+07	4.72964e+07	5.1187e+07	2.98149e+07	2.06027e+07	6.68417e+07	1.52352e+07	3.3756e+07	2.38811e+07	2.15362e+07	6.25815e+07	4.01234e+07	3.88855e+07	5.5782e+07	5.43354e+07	6.06107e+07	6.00746e+07
Persicachrome	0.627684	B(iii)			35.0742	385.274	forward	749314	669882	845675	1.10989e+06	4.23362e+06	950440	4.31458e+06	1.18017e+06	5.19008e+06	9.40093e+06	4.81436e+06	2.74288e+06	4.95544e+06	7.55039e+06	3.69852e+06	3.77367e+06	1.08131e+06	1.26922e+06	523617	1.67646e+06	2.09852e+06	1.1069e+06	1.09856e+06	754294	2.28632e+07	4.92823e+06	4.29304e+06	6.02657e+06	6.72307e+06	5.39858e+06	2.98021e+06	651028	2.71343e+06	3.44978e+06	3.11408e+06	3.3546e+06	3.69597e+06
Arecaidine	0.625694	B(iii)			322.195	142.086	forward	6.02678e+06	6.83896e+06	7.42801e+06	1.0425e+07	6.80374e+06	7.12069e+06	9.29473e+06	7.17641e+06	9.74328e+06	8.78961e+06	7.20511e+06	1.15618e+07	5.7803e+06	7.55978e+06	7.06461e+06	6.04153e+06	7.91532e+06	6.8967e+06	6.83025e+06	7.0198e+06	6.62021e+06	8.02158e+06	8.57161e+06	5.77238e+06	5.16124e+06	8.60715e+06	7.03475e+06	6.8773e+06	8.9753e+06	6.5986e+06	7.6544e+06	6.23799e+06	7.15251e+06	7.21319e+06	7.70622e+06	7.66981e+06	7.86555e+06
(4-Hydroxybenzoyl)choline	0.624973	B(iii)			562.17	224.128	forward	1.06214e+07	1.10016e+07	9.67512e+06	1.05555e+07	1.21947e+07	1.0879e+07	1.14543e+07	1.23047e+07	1.04763e+07	9.7602e+06	1.05508e+07	1.16987e+07	1.25706e+07	1.31756e+07	1.13989e+07	1.53652e+07	1.09236e+07	1.25709e+07	9.81078e+06	1.08704e+07	2.16245e+07	1.02668e+07	1.20804e+07	1.24734e+07	1.1025e+07	1.25975e+07	1.11333e+07	1.19258e+07	1.24402e+07	1.22001e+07	1.30439e+07	1.58819e+07	9.52762e+06	1.07774e+07	2.40636e+07	9.45868e+06	1.20523e+07
PC(20:2(11Z,14Z)/20:4(5Z,8Z,11Z,14Z))	0.624016	B(iii)			85.6753	834.602	forward	840913	773519	3.24197e+06	3.1796e+06	2.36875e+06	1.82954e+06	5.6013e+06	1.18442e+06	3.2973e+06	5.69186e+06	5.64572e+06	5.50879e+06	5.42319e+06	2.24315e+06	8.66754e+06	3.54455e+06	2.38332e+06	1.31759e+06	4.4478e+06	1.61009e+06	2.31217e+06	3.1557e+06	4.57021e+06	3.36765e+06	1.13193e+07	1.34985e+07	5.77647e+06	8.13786e+06	6.04198e+06	7.69633e+06	5.15269e+06	5.94564e+06	4.66618e+06	1.31657e+07	7.29282e+06	1.29106e+07	5.71881e+06
1,6-Dihydroxy-3,7-dimethoxy-2-(3-methyl-2-butenyl)-8-(3-hydroxy-3-methyl-1E-butenyl)-xanthone	0.623512	B(iii)			389.667	441.189	forward	1.21782e+06	1.58962e+06	1.18561e+06	1.74808e+06	1.38797e+06	1.42415e+06	1.31333e+06	1.60751e+06	1.24508e+06	1.85172e+06	1.53846e+06	1.26979e+06	1.76518e+06	1.87099e+06	1.36425e+06	1.43529e+06	1.36452e+06	1.61947e+06	1.71982e+06	1.32254e+06	1.90194e+06	1.46722e+06	1.41743e+06	1.30987e+06	1.40101e+06	1.64984e+06	1.33166e+06	1.39239e+06	1.39826e+06	1.47424e+06	1.61246e+06	751383	836129	1.23371e+06	1.48392e+06	1.71406e+06	1.40634e+06
Phenyllactic acid	0.623311	B(iii)			58.2257	165.055	forward	3.78343e+06	3.12166e+06	3.30887e+06	3.93707e+06	3.23775e+06	4.25152e+06	3.73155e+06	2.73244e+06	2.61354e+06	3.21572e+06	3.12455e+06	3.39246e+06	4.00638e+06	3.31112e+06	2.96733e+06	3.17016e+06	3.46211e+06	3.01096e+06	3.05607e+06	2.94273e+06	3.96405e+06	3.80603e+06	4.0136e+06	3.25526e+06	3.20772e+06	4.42628e+06	4.01539e+06	2.79647e+06	3.37427e+06	3.32709e+06	3.10773e+06	3.24251e+06	1.98367e+06	2.84873e+06	2.90505e+06	2.50989e+06	1.96767e+06
SM(d18:1/22:0)	0.623114	B(iii)			200.395	787.67	forward	1.09325e+07	5.76781e+06	6.93959e+06	4.01679e+06	4.99212e+06	4.49758e+06	5.34469e+06	9.49083e+06	5.02987e+06	7.30147e+06	9.69726e+06	6.9048e+06	8.30832e+06	6.45475e+06	7.01718e+06	8.82991e+06	4.95817e+06	6.10889e+06	8.838e+06	5.94983e+06	6.64072e+06	6.90734e+06	6.61808e+06	8.28087e+06	1.635e+07	7.94144e+06	9.05522e+06	1.02672e+07	7.45728e+06	6.13767e+06	7.66152e+06	8.98996e+06	4.79602e+06	4.48233e+06	4.21555e+06	4.0017e+06	3.96234e+06
Fenbendazole	0.622882	B(iii)			263.824	298.07	forward	9.65197e+06	3.03587e+06	2.4518e+07	2.15246e+07	1.59305e+07	8.54428e+06	2.04984e+07	1.78008e+07	6.36532e+06	8.95838e+06	5.59883e+06	1.4379e+07	5.00827e+06	1.25562e+07	3.9668e+07	6.90979e+06	3.788e+07	3.48927e+06	6.27601e+07	7.11771e+06	7.26072e+06	8.72511e+06	1.54281e+07	1.2911e+07	2.32827e+07	1.11094e+07	9.21127e+06	5.6728e+06	1.10978e+07	1.72264e+07	4.71796e+06	1.69605e+07	1.23418e+07	1.65056e+07	1.25659e+07	6.91454e+06	6.17806e+06
Stigmastentriol	0.622375	B(iii)			21.4351	447.384	forward	142159	235233	104900	110826	77458.5	237979	152545	192498	269957	163523	76441.8	49557.7	139226	281502	238082	89730	122986	72992.9	197057	105525	125643	261319	224117	51561.3	151092	123636	180593	61692.6	168622	314831	136093	87099	183856	202741	206561	176063	185365
Methyl 3-(2,3-dihydroxy-3-methylbutyl)-4-hydroxybenzoate	0.622109	B(iii)			576.195	255.12	forward	5.04617e+06	5.86279e+06	5.56109e+06	4.41199e+06	5.29997e+06	4.78641e+06	4.27169e+06	6.29523e+06	5.62032e+06	4.85641e+06	4.05362e+06	3.83315e+06	4.71757e+06	4.93324e+06	5.65845e+06	5.01773e+06	5.48363e+06	5.05431e+06	5.80698e+06	4.73937e+06	4.99147e+06	5.18867e+06	5.6762e+06	5.03896e+06	4.50485e+06	5.52059e+06	5.26624e+06	5.09104e+06	4.67205e+06	4.92797e+06	5.50392e+06	4.67967e+06	4.49379e+06	4.98503e+06	5.11618e+06	5.04509e+06	5.22019e+06
PC(18:3(6Z,9Z,12Z)/18:1(11Z))	0.6213	B(iii)			137.367	782.569	forward	1.09313e+08	2.21156e+08	2.36749e+08	8.03876e+07	9.29856e+07	1.74337e+08	1.90323e+08	2.58042e+08	1.22367e+08	1.94826e+08	1.1251e+08	1.56718e+08	1.15878e+08	5.50524e+07	8.43942e+07	9.18652e+07	1.47925e+08	1.80863e+08	2.08979e+08	2.7474e+08	1.21028e+08	2.7628e+08	1.60144e+08	2.55448e+08	8.74529e+07	2.41946e+08	1.24898e+08	7.40316e+07	2.42729e+08	8.10613e+07	1.84157e+08	9.91662e+07	2.60983e+08	2.66613e+08	2.61399e+08	7.60897e+07	2.43402e+08
Persicaxanthin	0.620353	B(iii)			213.388	385.274	forward	35819.3	50029.7	0	0	96783.9	19317.1	199302	23752.2	185197	161688	168456	135496	117426	232415	133725	77963.8	55630.6	82619.1	54362.1	54592.2	30201.5	33977.8	33698.9	45429.5	331951	146736	210886	93011.7	196655	139735	156328	49242.1	154955	168806	160769	161092	174066
PC(20:4(8Z,11Z,14Z,17Z)/20:3(8Z,11Z,14Z))	0.619259	B(iii)			84.9707	832.586	forward	716658	873882	2.44974e+06	503251	5.5734e+06	1.52134e+06	3.65769e+06	1.01921e+06	1.19733e+06	7.62352e+06	5.87274e+06	2.81285e+06	2.27656e+06	1.3149e+06	1.82104e+06	1.8573e+06	1.32515e+06	1.68547e+06	623421	1.32076e+06	1.37232e+06	1.42717e+06	1.06021e+06	2.54432e+06	4.27961e+06	3.38231e+06	6.92706e+06	1.90314e+06	5.3522e+06	3.25534e+06	2.17387e+06	2.67729e+06	1.40065e+06	1.02497e+06	1.49962e+06	2.32403e+06	1.32602e+06
Thymine	0.616816	B(iii)			270.704	127.05	forward	2.53339e+06	3.27147e+06	3.32957e+06	2.75167e+06	3.29796e+06	3.28235e+06	3.40315e+06	3.88642e+06	1.89166e+06	2.7169e+06	3.132e+06	2.34892e+06	2.92289e+06	3.64372e+06	1.33511e+06	4.6923e+06	3.17744e+06	2.88597e+06	3.41832e+06	3.09071e+06	3.94137e+06	2.87516e+06	3.35564e+06	3.10959e+06	2.43719e+06	3.18622e+06	619829	2.9067e+06	3.61255e+06	3.22838e+06	3.15788e+06	2.29799e+06	2.05927e+06	3.21594e+06	3.54993e+06	3.7711e+06	3.36291e+06
PC(P-18:1(11Z)/22:6(4Z,7Z,10Z,13Z,16Z,19Z))	0.615816	B(iii)			63.7664	816.591	forward	188361	982294	914655	321683	3.19116e+06	1.12542e+06	2.72348e+06	594749	1.23759e+06	6.27601e+06	1.26171e+06	750690	1.35359e+06	1.79349e+06	4.28163e+06	2.4032e+06	800971	1.43602e+06	159619	821233	1.16909e+06	2.90324e+06	1.0623e+06	663283	2.2699e+06	2.77004e+06	1.33871e+06	3.2357e+06	1.84985e+06	2.76048e+06	2.89919e+06	123986	3.62376e+06	3.38464e+06	5.98795e+06	5.21161e+06	4.35076e+06
3-Methyl-5-pentyl-2-furanundecanoic acid	0.615531	B(iii)			165.42	337.274	forward	742306	1.99697e+06	816667	1.54801e+06	670942	1.19237e+06	727827	1.86461e+06	364700	206879	313920	254139	0	213913	116333	213106	1.16124e+06	1.29327e+06	1.46225e+06	1.3268e+06	1.65541e+06	1.06041e+06	959847	1.10413e+06	99700.6	448826	212645	290465	163696	422345	919555	1.00079e+06	376876	691012	299540	493199	470688
Pregnanetriol	0.615203	B(iii)			35.0789	337.274	forward	1.14916e+07	8.73264e+06	1.4482e+07	2.0973e+07	8.1252e+06	1.08919e+07	6.36056e+06	1.41727e+07	4.74032e+06	2.58264e+06	3.94081e+06	1.74637e+06	4.82182e+06	1.03908e+07	5.06947e+06	1.03611e+07	1.01484e+07	7.00165e+06	1.0955e+07	9.63528e+06	2.81782e+07	1.80224e+07	1.87105e+07	9.20668e+06	7.55013e+06	2.78903e+06	4.09902e+06	3.34078e+06	2.96211e+06	6.77412e+06	3.16496e+06	1.36406e+07	8.3111e+06	8.63511e+06	8.32316e+06	9.36849e+06	9.80687e+06
4-Trimethylammoniobutanoic acid	0.615044	B(iii)			263.473	146.118	forward	1.04157e+07	5.85792e+06	5.3037e+06	6.62168e+06	4.3013e+06	5.44362e+06	6.662e+06	6.38381e+06	3.91434e+06	8.36184e+06	6.68688e+06	9.39783e+06	8.69423e+06	6.61047e+06	4.43036e+06	7.55172e+06	3.47832e+06	4.98184e+06	3.44407e+06	6.04224e+06	5.31921e+06	5.14168e+06	4.65932e+06	4.67697e+06	3.63979e+06	7.98933e+06	5.7702e+06	5.54616e+06	5.43799e+06	8.92487e+06	5.57043e+06	7.6287e+06	5.91971e+06	6.44754e+06	6.33334e+06	6.72722e+06	6.65451e+06
PC(18:2(9Z,12Z)/18:0)	0.614733	B(iii)			167.44	786.598	forward	7.89954e+08	6.58053e+08	7.17365e+08	7.36283e+08	7.19126e+08	8.24e+08	7.96695e+08	8.60632e+08	6.15791e+08	6.74395e+08	7.07686e+08	7.16706e+08	6.49917e+08	7.1997e+08	7.25424e+08	7.36026e+08	8.05933e+08	7.84178e+08	7.5597e+08	9.22595e+08	1.02141e+09	7.71627e+08	8.72464e+08	8.39367e+08	1.22474e+09	7.89995e+08	5.87777e+08	6.83972e+08	6.61932e+08	8.00856e+08	6.83649e+08	8.72972e+08	7.85326e+08	7.93014e+08	8.04893e+08	7.09749e+08	7.46679e+08
Gibberellin A21	0.614653	B(iii)			334.764	363.141	forward	923239	1.15009e+06	1.01423e+06	1.3112e+06	1.25613e+06	857259	327942	413242	1.40101e+06	1.69417e+06	1.3662e+06	3.33619e+06	833074	994007	746286	1.33585e+06	963127	1.09479e+06	821700	1.62033e+06	1.26047e+06	1.37342e+06	937392	519905	1.25783e+06	1.08335e+06	1.58028e+06	1.38698e+06	951576	2.00546e+06	728363	1.15198e+06	1.537e+06	1.67471e+06	1.49977e+06	1.34487e+06	1.09943e+06
1-Hydroxy-3-methoxy-10-methylacridone	0.613296	B(iii)			301.816	256.095	forward	897852	3.17061e+06	1.886e+06	1.31289e+06	3.10155e+06	3.63644e+06	4.64202e+06	1.35814e+06	4.17723e+06	1.19778e+06	716913	3.25678e+06	1.32049e+06	2.73628e+06	4.29761e+06	1.92827e+06	1.90497e+06	1.32028e+06	3.76203e+06	2.41624e+06	3.40402e+06	2.27085e+06	2.87038e+06	2.66496e+06	2.04497e+06	2.03253e+06	1.60248e+06	2.5201e+06	2.84402e+06	4.22026e+06	1.79765e+06	2.40491e+06	2.45861e+06	2.6429e+06	2.36754e+06	2.08666e+06	2.0574e+06
PC(20:1(11Z)/20:4(5Z,8Z,11Z,14Z))	0.613249	B(iii)			128.847	836.617	forward	3.93584e+06	4.4728e+06	2.82894e+06	1.41274e+06	6.71324e+06	2.70267e+06	2.0026e+07	2.7395e+06	8.50209e+06	6.33086e+06	9.29315e+06	1.78541e+07	1.60805e+07	5.87247e+06	5.35246e+06	5.23201e+06	3.06263e+06	7.90859e+06	4.06742e+06	2.87483e+06	5.52532e+06	2.54038e+06	1.47084e+06	6.14336e+06	3.55495e+07	2.11021e+07	7.06954e+06	1.95473e+07	2.52651e+07	9.59455e+06	1.36349e+07	3.94991e+06	1.35726e+07	3.60134e+06	1.46074e+07	5.21023e+06	4.75195e+06
Dihydrojasmonic acid	0.612684	B(iii)			54.7274	211.134	forward	2.86577e+06	3.12049e+06	2.81284e+06	3.3121e+06	2.41466e+06	2.03047e+06	2.78557e+06	3.02047e+06	3.1173e+06	2.38103e+06	5.49829e+06	3.12787e+06	2.44696e+06	2.11916e+06	1.22487e+06	2.60735e+06	3.08354e+06	2.61719e+06	2.15957e+06	2.91339e+06	2.38051e+06	2.65461e+06	2.01811e+06	2.46778e+06	1.03188e+07	2.79937e+06	2.95013e+06	2.57389e+06	2.04304e+06	3.68471e+06	2.47084e+06	1.48173e+06	2.88256e+06	2.74855e+06	2.83764e+06	2.87266e+06	2.93641e+06
PC(22:5(7Z,10Z,13Z,16Z,19Z)/16:1(9Z))	0.612409	B(iii)			163.994	806.569	forward	2.55197e+07	1.6989e+07	3.18171e+07	1.54416e+07	5.97448e+07	3.17533e+07	8.84614e+07	2.46629e+07	4.60161e+07	9.27872e+07	9.68328e+07	9.85719e+07	7.83918e+07	5.38116e+07	8.60818e+07	3.98178e+07	3.17918e+07	2.95861e+07	2.29034e+07	2.7296e+07	2.39089e+07	2.65168e+07	2.36367e+07	2.80013e+07	1.34316e+08	1.22049e+08	9.3063e+07	9.18732e+07	1.23243e+08	7.44829e+07	9.69744e+07	3.25464e+07	6.03538e+07	6.25072e+07	6.6177e+07	6.16143e+07	6.64245e+07
Lysyl-Aspartate	0.612084	B(iii)			562.204	262.14	forward	3.18507e+06	676269	1.6895e+06	1.94508e+06	653652	720163	602823	2.49483e+06	2.2691e+06	1.63071e+06	2.05144e+06	3.16254e+06	1.0988e+06	3.53375e+06	594578	870631	1.18086e+06	1.01831e+06	608091	1.45961e+06	915291	1.45008e+06	790749	757062	1.01987e+06	1.82233e+06	932550	1.05689e+06	907242	855845	928174	527993	1.13968e+06	1.24214e+06	1.16943e+06	1.65141e+06	1.15096e+06
PC(22:5(4Z,7Z,10Z,13Z,16Z)/20:5(5Z,8Z,11Z,14Z,17Z))	0.611809	B(iii)			158.658	854.57	forward	136102	77200.3	254170	63936	357934	230775	1.20664e+06	200455	298264	461138	408631	720939	396506	289987	527093	296805	218369	119065	169009	195974	204349	690370	198373	383183	1.53783e+06	808438	668627	679319	1.01574e+06	437675	1.00459e+06	531778	388414	613203	458397	450446	757901
dGTP	0.611145	B(iii)			512.3	505.989	forward	1.24165e+06	2.00961e+06	614149	384759	3.53099e+06	805687	1.11809e+06	4.16604e+06	2.9825e+06	446413	2.21584e+06	429287	3.91653e+06	2.03563e+06	2.63086e+06	2.01006e+06	973361	1.14147e+06	768530	1.15031e+06	4.30333e+06	908097	4.77967e+06	375509	234554	1.20745e+06	1.92359e+06	2.93631e+06	1.07309e+06	742237	1.00602e+06	1.30263e+06	1.69536e+06	959346	1.21214e+06	3.39418e+06	2.20268e+06
SM(d18:1/20:0)	0.611114	B(iii)			201.646	759.638	forward	1.58427e+07	1.16529e+07	1.13293e+07	1.08352e+07	8.24501e+06	9.47878e+06	1.05192e+07	1.14669e+07	9.01188e+06	9.37202e+06	9.29678e+06	9.45552e+06	9.84426e+06	9.27676e+06	9.91815e+06	1.15069e+07	1.00605e+07	1.18038e+07	1.15361e+07	7.08479e+06	1.06901e+07	1.03779e+07	1.14915e+07	1.36214e+07	1.82169e+07	1.1792e+07	1.27998e+07	1.38728e+07	1.06924e+07	1.00459e+07	9.12162e+06	1.2321e+07	9.28887e+06	9.49209e+06	8.17134e+06	7.61169e+06	7.07804e+06
PC(22:5(7Z,10Z,13Z,16Z,19Z)/20:4(5Z,8Z,11Z,14Z))	0.610846	B(iii)			159.369	856.585	forward	0	36244.4	300825	97701.3	603163	99267.9	670120	63584.6	133805	709903	219359	774501	308110	0	587452	503228	56380.6	306212	0	256118	190380	103250	258698	235272	1.54117e+06	584889	608244	484167	828010	537308	678225	454996	244219	490021	247828	380601	449253
PC(22:5(4Z,7Z,10Z,13Z,16Z)/P-18:0)	0.610837	B(iii)			83.2489	820.622	forward	4.51434e+06	1.30358e+07	1.24418e+07	5.58674e+06	1.60269e+07	7.76868e+06	1.60318e+07	5.24264e+06	1.31154e+07	1.21668e+07	1.53959e+07	1.0783e+07	1.18957e+07	1.33395e+07	1.69655e+07	1.48807e+07	6.26279e+06	2.57154e+06	4.87772e+06	1.06661e+07	8.82892e+06	1.53357e+07	1.27684e+07	1.37559e+07	4.71884e+06	1.24291e+07	1.4176e+07	1.79395e+07	1.82029e+07	2.03699e+07	7.44277e+06	2.33081e+06	1.37478e+07	2.51614e+07	2.43338e+07	6.78407e+06	2.37696e+07
PC(18:2(9Z,12Z)/15:0)	0.610287	B(iii)			55.7786	744.555	forward	252764	460188	275995	440057	194515	275182	252986	277831	168348	146782	199047	300081	257511	191735	239522	128907	184511	356817	160902	292966	232735	285717	286180	167499	119625	188248	210379	191748	195822	176724	144832	132087	185473	305252	195810	250222	265877
L-Thyronine	0.609878	B(iii)			467.546	274.115	forward	7.72213e+06	8.28311e+06	8.63817e+06	6.70039e+06	8.13324e+06	8.06422e+06	8.09203e+06	1.00071e+07	7.12279e+06	9.17005e+06	6.54397e+06	6.22061e+06	7.31484e+06	9.23321e+06	8.19235e+06	6.55031e+06	9.66979e+06	6.75894e+06	9.99866e+06	8.60006e+06	7.31762e+06	8.26804e+06	8.38465e+06	8.42292e+06	8.5849e+06	1.17263e+07	7.61499e+06	6.60451e+06	7.51627e+06	7.28841e+06	9.55415e+06	8.32046e+06	7.42158e+06	8.46583e+06	8.35095e+06	7.96316e+06	7.4155e+06
Urocanic acid	0.608909	B(iii)			298.347	137.035	forward	1.30444e+06	5.32698e+06	1.5031e+06	1.51083e+06	1.53792e+06	8.87481e+06	1.75795e+06	2.46092e+06	4.90418e+06	1.18679e+06	1.34278e+06	1.32238e+06	3.1942e+06	2.7572e+06	7.24309e+06	1.87648e+06	5.59547e+06	1.28826e+06	5.39581e+06	2.25063e+06	1.84039e+06	5.98211e+06	4.10247e+06	1.4274e+06	9.07644e+06	1.31198e+06	7.81045e+06	1.00747e+06	4.47113e+06	7.03666e+06	4.05375e+06	1.30526e+06	3.7295e+06	3.70939e+06	3.50596e+06	3.75571e+06	3.84498e+06
PC(15:0/15:0)	0.608904	B(iii)			174.283	706.538	forward	2.79175e+07	2.72779e+07	3.05513e+07	3.06654e+07	7.99746e+07	3.10442e+07	7.4769e+07	2.80292e+07	5.3497e+07	7.16035e+07	6.59804e+07	7.44042e+07	8.56249e+07	5.31739e+07	5.00872e+07	3.94334e+07	3.21043e+07	3.31231e+07	2.36843e+07	3.6808e+07	4.37203e+07	3.2888e+07	2.76537e+07	2.66169e+07	2.60555e+08	7.17977e+07	1.11739e+08	8.94026e+07	9.15285e+07	7.46537e+07	6.4627e+07	3.86934e+07	5.49614e+07	5.98486e+07	5.60384e+07	5.30111e+07	5.42425e+07
Ascochitine	0.607963	B(iii)			436.247	275.088	forward	375291	475962	424477	399207	399749	468438	371580	450706	473788	599328	353843	379449	391586	1.34442e+06	404178	403491	461861	465524	465447	375370	511111	412120	435808	495996	396856	439092	455201	585516	504902	397832	474766	431895	379491	404490	385781	361759	464985
PC(P-18:1(11Z)/22:5(4Z,7Z,10Z,13Z,16Z))	0.606052	B(iii)			117.782	818.606	forward	1.01178e+07	1.07126e+07	2.19195e+07	1.69851e+07	4.31613e+07	8.24967e+06	1.60041e+07	1.31545e+07	5.73696e+07	7.56153e+07	6.70808e+07	4.29684e+07	1.63334e+07	2.32278e+07	2.10754e+07	2.86507e+07	9.79728e+06	1.87054e+07	6.0191e+06	1.81103e+07	2.13314e+07	2.08374e+07	8.26667e+06	8.59381e+06	1.29158e+07	4.63219e+07	1.79211e+07	1.21922e+07	2.0597e+07	2.60952e+07	1.65853e+07	5.8021e+06	1.64833e+07	1.05347e+07	9.48461e+06	1.05559e+07	3.95183e+07
Mesylate	0.605769	B(iii)			98.3671	94.9797	forward	3.81997e+07	4.63185e+07	4.3884e+07	4.02215e+07	4.27528e+07	4.63374e+07	5.46694e+07	4.47815e+07	4.65919e+07	4.7407e+07	4.45124e+07	6.38461e+07	4.61899e+07	4.57746e+07	3.97955e+07	3.4663e+07	2.60861e+07	3.78468e+07	3.79331e+07	3.99341e+07	4.67333e+07	5.09925e+07	2.66796e+07	3.83279e+07	9.93138e+07	3.72922e+07	4.54801e+07	3.80791e+07	4.38184e+07	5.37843e+07	3.2775e+07	3.6342e+07	3.30312e+07	2.75385e+07	4.49413e+07	4.11306e+07	3.11638e+07
8-hydroxy-6,7-dimethoxy-2H-chromen-2-one	0.605513	B(iii)			29.4595	223.064	forward	1.85606e+06	1.1494e+06	1.22442e+06	1.21708e+06	1.66845e+06	1.52552e+06	3.10769e+06	965853	1.36457e+06	1.15818e+06	1.18849e+06	833925	1.93389e+06	2.16965e+06	2.53884e+06	1.25422e+06	1.008e+06	1.4899e+06	1.29301e+06	1.22256e+06	1.20185e+06	2.31076e+06	4.18014e+06	2.77248e+06	1.18316e+06	3.01475e+06	1.25917e+06	1.82225e+06	1.29082e+06	1.47366e+06	1.86028e+06	853644	1.11552e+08	1.14835e+08	1.08044e+08	1.21165e+08	1.21155e+08
Oxidized glutathione	0.603758	B(iii)			498.37	613.16	forward	165206	538662	191877	184163	367028	151821	220442	864733	790609	98847.1	264315	96293.6	209565	765202	866570	517370	121081	156231	77816.9	150798	532711	67118.4	336332	77710.3	12557.7	177471	199716	183682	129276	104253	37264.7	91731.3	165976	276238	279274	271230	230158
Isotheaflavin	0.60348	B(iii)			427.546	565.139	forward	1.025e+06	1.42226e+06	2.01949e+06	2.51749e+06	1.60799e+06	1.70035e+06	2.17451e+06	1.31065e+06	1.86153e+06	1.90337e+06	1.91346e+06	1.33549e+06	1.34731e+06	2.2409e+06	1.90318e+06	1.44356e+06	1.21622e+06	947635	1.16579e+06	1.44301e+06	2.37171e+06	1.3048e+06	1.52263e+06	1.95346e+06	1.1364e+06	1.80776e+06	1.26109e+06	2.15257e+06	1.68993e+06	1.05583e+06	745985	1.0532e+06	1.52936e+06	2.14405e+06	1.88991e+06	2.10059e+06	1.78569e+06
PC(20:4(5Z,8Z,11Z,14Z)/20:4(8Z,11Z,14Z,17Z))	0.602758	B(iii)			161.801	830.569	forward	2.06625e+06	965157	3.4026e+06	864126	2.42827e+06	2.33409e+06	4.66542e+06	2.35616e+06	1.07381e+06	2.45988e+06	1.65852e+06	2.63064e+06	2.4554e+06	639721	2.65228e+06	1.74473e+06	2.52992e+06	3.08417e+06	966176	2.44665e+06	2.77872e+06	2.60102e+06	2.14803e+06	1.71574e+06	7.12632e+06	3.07667e+06	3.41841e+06	3.91989e+06	4.77913e+06	1.8485e+06	4.58676e+06	3.93551e+06	3.40414e+06	2.81831e+06	2.64875e+06	3.23677e+06	2.60703e+06
Pterolactam	0.602589	B(iii)			564.495	116.071	forward	1.05765e+07	1.86429e+07	7.93209e+06	1.01563e+07	8.90399e+06	6.42936e+06	6.19708e+06	9.08371e+06	1.614e+07	7.88253e+06	9.10671e+06	1.40309e+07	7.75964e+06	1.27549e+07	1.14548e+07	7.27875e+06	8.43236e+06	1.95325e+07	7.59974e+06	8.51926e+06	8.02494e+06	6.79676e+06	7.33788e+06	7.27274e+06	1.18851e+07	1.39188e+07	1.06543e+07	7.88056e+06	1.01093e+07	7.8084e+06	7.63825e+06	9.6832e+06	8.21609e+06	6.81648e+06	8.99632e+06	9.4248e+06	4.55356e+07
Argininosuccinic acid	0.602477	B(iii)			476.284	291.13	forward	100988	300550	158594	672724	434665	434208	1.16076e+06	421500	622911	148733	188447	201658	338908	1.14931e+06	360362	157634	161712	94700.9	145201	229526	444565	377376	613173	270601	570827	714472	259857	165993	414658	248885	264914	359029	331678	328847	339833	384379	436243
Monomethyl glutaric acid	0.602063	B(iii)			377.906	145.05	forward	5.68936e+06	5.87567e+06	5.47926e+06	5.65541e+06	5.53738e+06	5.92116e+06	4.23535e+06	5.89888e+06	5.89355e+06	5.35564e+06	5.4058e+06	4.0433e+06	4.24784e+06	6.52989e+06	6.18864e+06	5.38717e+06	5.76363e+06	5.7873e+06	6.20893e+06	5.24985e+06	4.18341e+06	4.48019e+06	6.5476e+06	5.36865e+06	9.77442e+06	5.98716e+06	6.02047e+06	5.67773e+06	5.44876e+06	5.56372e+06	6.01384e+06	5.17213e+06	5.79137e+06	4.43321e+06	4.64048e+06	6.20548e+06	6.02315e+06
SM(d18:0/18:1(9Z))	0.600614	B(iii)			203.63	731.603	forward	5.9886e+08	5.31339e+08	5.92286e+08	4.55735e+08	4.23126e+08	4.50157e+08	4.21298e+08	6.43538e+08	4.4203e+08	4.77994e+08	4.8563e+08	5.03167e+08	5.07574e+08	4.85064e+08	4.92231e+08	5.53162e+08	4.80106e+08	5.03803e+08	5.8956e+08	3.87312e+08	4.27928e+08	4.77365e+08	5.34663e+08	5.4266e+08	3.18201e+08	5.59217e+08	4.2758e+08	4.22842e+08	4.60554e+08	4.53828e+08	5.80751e+08	5.05322e+08	4.42098e+08	4.28168e+08	4.15462e+08	3.86813e+08	3.80642e+08
PC(20:5(5Z,8Z,11Z,14Z,17Z)/P-18:1(11Z))	0.600385	B(iii)			84.5764	790.574	forward	5.28964e+06	5.33705e+06	5.0634e+06	3.76388e+06	1.12026e+07	4.29388e+06	3.20649e+07	1.29227e+07	2.63249e+07	3.84214e+07	6.3996e+07	2.99385e+07	2.58504e+07	1.11144e+08	2.45835e+07	6.79018e+06	4.91452e+06	8.0184e+06	1.61148e+07	1.21921e+07	3.68145e+06	1.2142e+07	8.10649e+06	1.45103e+07	8.85487e+06	2.63663e+07	4.88396e+07	5.858e+07	1.80829e+07	7.9873e+07	2.45986e+07	5.11194e+06	1.9413e+07	1.93586e+07	1.07632e+07	1.55912e+07	1.48184e+07
PC(22:5(7Z,10Z,13Z,16Z,19Z)/16:0)	0.600295	B(iii)			99.4806	808.585	forward	6.32395e+06	7.5859e+06	1.23089e+07	6.4961e+06	3.00984e+07	1.46891e+07	2.63508e+07	9.38205e+06	2.62272e+07	2.81611e+07	2.99905e+07	8.26487e+07	7.82106e+07	2.07647e+07	2.302e+07	2.03095e+07	9.67562e+06	6.06575e+06	1.18002e+07	9.53907e+06	9.66233e+06	9.66557e+06	7.67874e+06	1.11444e+07	9.80925e+07	3.53176e+07	9.17249e+07	3.43013e+07	4.00418e+07	1.62469e+07	2.90208e+07	1.12297e+07	2.52194e+07	1.98355e+07	2.2568e+07	2.36002e+07	1.94667e+07
PC(14:0/14:0)	0.599564	B(iii)			176.5	678.508	forward	466118	780275	671759	686227	1.32493e+06	555718	2.10301e+06	406161	1.60906e+06	1.92347e+06	1.73075e+06	1.9545e+06	3.26765e+06	1.43299e+06	1.02984e+06	833352	638401	504729	454806	751932	877555	586283	765096	341806	1.69685e+07	1.64219e+06	3.48657e+06	2.71083e+06	2.46863e+06	1.64667e+06	1.39246e+06	713634	1.99062e+06	1.66424e+06	2.00091e+06	1.69588e+06	1.72513e+06
PC(22:2(13Z,16Z)/15:0)	0.598938	B(iii)			166.527	800.614	forward	3.57747e+06	2.17385e+06	2.13099e+06	2.87057e+06	4.17109e+06	3.87814e+06	4.11129e+06	2.07032e+06	2.77801e+06	2.10526e+06	2.9741e+06	3.74287e+06	3.44587e+06	2.34492e+06	3.66903e+06	2.37714e+06	2.73944e+06	2.92335e+06	1.45757e+06	5.11784e+06	3.19151e+06	1.56706e+06	2.71417e+06	2.08723e+06	5.51406e+06	3.3493e+06	3.89448e+06	3.72068e+06	4.11476e+06	3.692e+06	2.7657e+06	2.68972e+06	2.88439e+06	4.04279e+06	2.71336e+06	1.90541e+06	3.04837e+06
Phenylmethylglycidic ester	0.597806	B(iii)			333.606	207.099	forward	7.63151e+06	5.2461e+06	5.95378e+06	4.0492e+06	5.82058e+06	7.50484e+06	8.54244e+06	7.09896e+06	6.1667e+06	1.06732e+07	4.06136e+06	4.48353e+06	4.18308e+06	5.02292e+06	7.47625e+06	5.60603e+06	6.68271e+06	6.16159e+06	1.35282e+07	9.90701e+06	6.75042e+06	1.0685e+07	6.97548e+06	5.69488e+06	3.64918e+06	1.20627e+07	5.59322e+06	4.1794e+06	5.04471e+06	4.08826e+06	7.53646e+06	5.36029e+06	7.23047e+06	4.82779e+06	8.42071e+06	5.48396e+06	4.81858e+06
Histidinyl-Glycine	0.596662	B(iii)			355.476	213.098	forward	2.47153e+06	3.5429e+06	4.50515e+06	3.33926e+06	3.67891e+06	3.50733e+06	3.18604e+06	4.03351e+06	5.41788e+06	3.09634e+06	2.4346e+06	2.34936e+06	2.80763e+06	3.82242e+06	4.0312e+06	4.91686e+06	3.33512e+06	2.33487e+06	4.66812e+06	2.64618e+06	3.69635e+06	5.53518e+06	3.95666e+06	5.65806e+06	3.54137e+06	3.60593e+06	2.8415e+06	2.73749e+06	2.811e+06	4.23933e+06	3.12498e+06	2.89457e+06	2.51452e+06	3.74322e+06	3.25344e+06	3.22249e+06	3.36099e+06
13S-hydroxyoctadecadienoic acid	0.596344	B(iii)			33.9621	279.232	forward	7.29064e+06	9.20223e+06	1.01819e+07	1.44373e+07	1.26601e+07	1.56488e+07	1.05351e+07	1.01263e+07	9.95732e+06	9.95143e+06	9.52473e+06	1.43818e+07	8.06842e+06	9.25572e+06	7.11694e+06	8.34383e+06	1.04792e+07	8.86405e+06	5.61285e+06	1.04408e+07	5.41706e+06	8.19023e+06	7.47491e+06	6.01371e+06	1.26898e+07	7.94516e+06	6.81956e+06	9.21202e+06	7.09276e+06	9.9206e+06	7.57884e+06	5.32794e+06	5.75236e+06	5.27535e+06	6.75661e+06	6.09335e+06	4.60905e+06
PC(20:1(11Z)/15:0)	0.596197	B(iii)			141.594	774.599	forward	1.2214e+07	1.25989e+07	1.94615e+06	8.40512e+06	2.0465e+07	1.38423e+07	1.18501e+07	3.89723e+06	4.63188e+06	1.59289e+07	1.86126e+07	2.31299e+07	2.33537e+07	1.39961e+07	1.1339e+07	1.26379e+07	6.02307e+06	8.90405e+06	5.44584e+06	1.19671e+07	5.85543e+06	8.74326e+06	5.77828e+06	1.03663e+07	2.37554e+07	1.91279e+07	2.48146e+07	1.75106e+07	2.43431e+07	1.9056e+07	2.04456e+07	6.39825e+06	1.20881e+07	8.39003e+06	1.24271e+07	1.54527e+07	1.31251e+07
PC(16:1(9Z)/16:1(9Z))	0.595144	B(iii)			151.897	730.538	forward	2.60734e+07	2.25245e+07	2.62543e+07	2.48381e+07	3.61006e+07	2.59778e+07	4.24737e+07	2.22222e+07	2.40281e+07	3.18074e+07	2.83698e+07	3.64913e+07	3.6257e+07	2.77352e+07	2.79833e+07	2.24726e+07	1.61549e+07	2.33663e+07	1.37569e+07	2.56515e+06	1.21454e+07	1.21188e+07	1.82575e+07	1.53438e+07	2.82306e+07	3.58682e+07	3.18069e+07	2.88481e+07	3.78264e+07	2.32824e+07	2.84998e+07	1.88407e+07	2.89636e+07	2.7615e+07	2.82597e+07	2.82399e+07	2.57939e+07
Montecristin	0.594896	B(iii)			173.278	575.504	forward	3.37371e+06	3.59931e+06	3.46056e+06	3.94695e+06	2.8693e+06	4.91301e+06	2.07312e+06	3.43977e+06	2.61982e+06	2.07819e+06	1.98392e+06	2.95136e+06	1.94928e+06	280447	2.36708e+06	2.34758e+06	3.71411e+06	3.30623e+06	2.84768e+06	2.70584e+06	3.06583e+06	1.97313e+06	2.82864e+06	3.46934e+06	3.4127e+06	2.54964e+06	2.80554e+06	2.45575e+06	3.15366e+06	1.88209e+06	3.34536e+06	3.36862e+06	2.94804e+06	2.7186e+06	2.62146e+06	2.35475e+06	2.65137e+06
3-(4-Methyl-3-pentenyl)thiophene	0.594415	B(iii)			118.839	167.093	forward	2.52733e+06	3.51806e+06	3.74951e+06	0	2.66017e+06	4.74295e+06	1.21812e+06	5.07526e+06	1.61073e+06	1.25871e+06	1.46431e+06	3.48719e+06	2.76101e+06	2.36771e+06	2.77853e+06	4.85892e+06	3.18926e+06	2.42452e+06	5.12159e+06	2.73236e+06	1.65327e+06	1.60661e+06	3.85219e+06	1.8833e+06	1.46287e+06	2.40463e+06	1.41751e+06	1.8123e+06	258132	2.78353e+06	2.97947e+06	3.81999e+06	2.24487e+06	2.61895e+06	478563	1.92368e+06	2.7258e+06
Arginyl-Asparagine	0.593983	B(iii)			510.977	289.162	forward	817082	525762	843163	882433	397406	833518	74243.6	860679	526809	382205	568660	631429	255952	487398	323816	227039	657959	368484	381029	543844	401705	342855	573924	493718	0	683386	82106.6	337103	186925	111457	395021	279794	425119	524860	500897	510549	530863
8-isoprostaglandin E2	0.593601	B(iii)			93.846	351.221	forward	2.02888e+06	1.11846e+06	1.29519e+06	1.49093e+06	1.149e+06	1.18902e+06	1.04466e+06	2.19727e+06	1.26243e+06	645339	1.74173e+06	1.39698e+06	1.214e+06	1.19118e+06	954995	973692	1.27674e+06	1.37853e+06	1.1698e+06	1.24613e+06	1.2197e+06	1.10733e+06	1.16036e+06	1.16388e+06	584937	1.01573e+06	1.37962e+06	1.12204e+06	1.14928e+06	869270	1.07353e+06	1.51265e+06	969450	827429	882944	918334	944370
PE(22:6(4Z,7Z,10Z,13Z,16Z,19Z)/16:1(9Z))	0.593511	B(iii)			41.9582	762.505	forward	203554	168797	215091	230415	16124.3	200884	79670.4	306813	214156	118378	183158	140146	113240	116599	169411	139095	314035	236298	217524	324322	238812	185844	240143	230261	18570.2	94835.9	49148.5	111579	31923.1	40542.4	105430	260986	142574	120627	101977	188312	106274
Cohibin C	0.592829	B(iii)			35.0996	577.52	forward	1.76526e+07	1.60514e+07	1.61964e+07	1.52933e+07	3.53552e+07	1.16255e+07	3.66056e+07	1.72589e+07	2.40354e+07	3.01253e+07	4.20195e+07	1.94619e+07	3.6249e+07	3.0928e+07	2.82005e+07	1.74394e+07	1.34384e+07	1.24871e+07	1.36808e+07	9.45233e+06	2.03283e+07	1.79728e+07	7.85062e+06	1.48854e+07	9.7671e+06	3.35387e+07	3.41701e+07	3.45921e+07	4.37965e+07	2.6274e+07	1.75174e+07	1.25718e+07	1.65841e+07	1.7078e+07	1.63056e+07	1.7759e+07	1.34134e+07
Hydroxyprolyl-Lysine	0.592729	B(iii)			309.762	260.15	forward	355881	896717	502406	190543	454601	722148	543189	553079	442221	292643	217673	760398	396843	218620	1.02354e+06	661294	967567	1.16329e+06	259090	432462	352404	539439	570161	374219	903702	526192	680998	476118	618943	548155	443583	665048	681340	668036	534597	595558	578437
SM(d18:0/14:0)	0.591806	B(iii)			207.193	677.552	forward	954246	898983	495503	1.07491e+06	1.91505e+06	697766	1.50834e+06	522560	1.3531e+06	1.2229e+06	1.4989e+06	1.67732e+06	1.8234e+06	1.31589e+06	1.38331e+06	620857	1.0864e+06	904264	874418	1.31009e+06	1.01714e+06	994915	1.07966e+06	1.10916e+06	3.19362e+06	1.50444e+06	1.89243e+06	2.211e+06	2.00611e+06	1.91807e+06	1.33585e+06	1.17338e+06	1.36699e+06	1.47754e+06	1.39675e+06	1.53917e+06	1.54183e+06
PC(22:5(4Z,7Z,10Z,13Z,16Z)/14:0)	0.590937	B(iii)			166.389	780.553	forward	2.34198e+07	1.91539e+07	1.86396e+07	1.36675e+07	1.03314e+08	1.40589e+07	1.49945e+08	1.98951e+07	9.91957e+07	1.51086e+08	1.76877e+08	1.73264e+08	1.41767e+08	1.11641e+08	1.87182e+08	3.81502e+07	2.10216e+07	2.49329e+07	8.49117e+06	1.31882e+07	9.18745e+06	1.1408e+07	1.74401e+07	2.10636e+07	2.1769e+08	2.509e+08	1.27613e+08	1.47261e+08	1.94206e+08	1.06055e+08	1.6879e+08	1.82477e+07	9.26634e+07	9.38655e+07	8.90067e+07	9.00567e+07	9.45472e+07
PC(18:4(6Z,9Z,12Z,15Z)/18:1(11Z))	0.590714	B(iii)			111.463	780.553	forward	2.71832e+06	4.7683e+06	5.34763e+06	1.60427e+06	2.51281e+07	4.98535e+06	4.2486e+07	4.2687e+06	2.17474e+07	3.70102e+07	4.03988e+07	4.5875e+07	3.39457e+07	2.66912e+07	5.23907e+07	1.26631e+07	3.62656e+06	5.1876e+06	4.17219e+06	2.95441e+06	2.90387e+06	4.8379e+06	1.48968e+06	3.16851e+06	6.29055e+07	6.8488e+07	4.7876e+07	3.35326e+07	3.433e+07	2.77762e+07	3.8016e+07	3.59297e+06	2.51708e+07	2.18245e+07	2.35066e+07	2.29057e+07	2.24657e+07
PC(20:3(8Z,11Z,14Z)/14:0)	0.589655	B(iii)			146.202	756.553	forward	1.1908e+08	9.66006e+07	1.55424e+08	1.18346e+08	1.6242e+08	1.10502e+08	1.68042e+08	1.00656e+08	1.22969e+08	1.43889e+08	1.65065e+08	1.72836e+08	1.30453e+08	1.05232e+08	2.00886e+08	8.68586e+07	7.80135e+07	8.50784e+07	9.27924e+07	8.20919e+07	7.13532e+07	6.70841e+07	1.0582e+08	9.19469e+07	1.34293e+08	1.65044e+08	1.55495e+08	1.59225e+08	1.77812e+08	1.24178e+08	1.43953e+08	1.10469e+08	1.41546e+08	1.20572e+08	1.62714e+08	1.5224e+08	8.00209e+07
N-(2-Hydroxyisobutyl)-2,4,8,10,12-tetradecapentaenamide	0.588425	B(iii)			36.2015	290.212	forward	769786	847394	779277	1.2039e+06	800745	941161	485021	774203	634356	840831	712513	854419	714020	991199	914856	710641	532481	756784	663323	831404	678562	879293	483628	692728	505330	1.04008e+06	592364	714403	588512	708527	694946	586858	475864	614987	567409	671992	493245
3,4,5-Trimethoxycinnamic acid	0.588421	B(iii)			28.7893	237.08	forward	1.39924e+06	1.9602e+06	836053	977929	1.74484e+06	1.67272e+06	2.31504e+06	1.21031e+06	2.24104e+06	739730	971752	1.75087e+06	2.94046e+06	2.69949e+06	1.86753e+06	854314	1.68807e+06	1.19733e+06	3.4719e+06	2.79616e+06	1.36191e+06	1.11534e+06	1.45944e+06	1.49249e+06	7.96016e+06	1.60104e+06	2.22932e+06	1.17478e+06	998595	1.68e+06	1.71702e+06	972752	3.30551e+06	906250	2.63514e+06	3.67709e+06	3.89662e+06
N-Hexadecanoylpyrrolidine	0.588071	B(iii)			31.7085	310.311	forward	4.05142e+06	5.34451e+06	3.86835e+06	1.5888e+06	4.61062e+06	2.95884e+06	5.46777e+06	315049	2.10481e+06	4.47981e+06	3.30176e+06	2.51864e+06	4.86872e+06	3.54829e+06	3.9899e+06	5.94326e+06	1.78644e+06	3.85816e+06	4.15236e+06	2.36309e+06	4.03038e+06	3.65775e+06	4.247e+06	3.76444e+06	6.89158e+06	5.19197e+06	3.72356e+06	1.98324e+06	3.16051e+06	2.31573e+06	3.87223e+06	3.31468e+06	926472	992120	894347	878020	1.35344e+06
Thiolutin	0.58793	B(iii)			440.06	229.011	forward	2.03177e+06	1.52706e+06	1.42447e+06	1.38641e+06	2.85228e+06	1.09668e+06	1.55466e+06	2.02064e+06	1.69191e+06	923735	1.27174e+06	1.39806e+06	938262	1.73473e+06	1.90841e+06	2.46938e+06	1.37654e+06	1.9479e+06	1.05451e+06	1.15616e+06	987326	998599	1.03896e+06	1.42648e+06	538773	823921	1.5085e+06	620865	946367	1.10694e+06	1.39662e+06	1.38057e+06	1.59688e+06	1.40831e+06	1.54528e+06	2.34172e+06	2.36063e+06
Phenylalanyl-Alanine	0.586256	B(iii)			322.171	237.123	forward	9.77522e+06	3.74324e+06	9.87158e+06	9.4157e+06	8.14364e+06	6.64867e+06	4.49079e+06	6.99844e+06	3.04704e+06	7.83393e+06	9.17947e+06	6.34914e+06	7.44082e+06	6.63867e+06	5.63758e+06	1.04654e+07	6.54781e+06	1.17593e+07	7.17679e+06	4.75667e+06	5.46443e+06	6.30637e+06	5.1084e+06	5.43855e+06	5.42112e+06	8.94455e+06	4.12888e+06	7.58108e+06	2.74162e+06	4.7417e+06	5.98958e+06	6.66334e+06	6.34632e+06	7.46518e+06	7.30736e+06	6.95403e+06	7.06175e+06
1-Isothiocyanato-4-phenylbutane	0.584158	B(iii)			155.296	192.088	forward	776990	1.82021e+06	1.93283e+06	903926	1.8013e+06	1.52069e+06	1.35878e+06	1.94692e+06	1.19668e+06	1.09154e+06	555926	428657	600153	1.05172e+06	1.37945e+06	1.12366e+06	2.08999e+06	1.6553e+06	1.40453e+06	1.04853e+06	1.57953e+06	1.51594e+06	2.33689e+06	1.71498e+06	914234	1.62803e+06	861299	1.11961e+06	1.38128e+06	1.27346e+06	1.34525e+06	1.23643e+06	1.42764e+06	1.87675e+06	1.3494e+06	1.64589e+06	1.29642e+06
Hypogeic acid	0.58396	B(iii)			42.0927	253.217	forward	9.72153e+07	8.04757e+07	6.85728e+07	1.07313e+08	1.37508e+08	1.38722e+08	1.26802e+08	7.98294e+07	1.6192e+08	6.12347e+07	8.3415e+07	1.29245e+08	1.35686e+08	1.24479e+08	1.37651e+08	5.68542e+07	1.14902e+08	7.40051e+07	1.24075e+08	1.10746e+08	5.76349e+07	9.08438e+07	8.6683e+07	8.45191e+07	3.04232e+08	1.14584e+08	1.60106e+08	1.14323e+08	1.09826e+08	1.53879e+08	1.2447e+08	1.20081e+08	9.88792e+07	9.57236e+07	9.8916e+07	9.85715e+07	9.96675e+07
PC(18:0/P-16:0)	0.583927	B(iii)			145.261	746.605	forward	8.89091e+07	8.41075e+07	6.48392e+07	9.28382e+07	7.12e+07	6.17021e+07	8.00812e+07	9.81023e+07	8.24895e+07	7.41294e+07	7.27579e+07	7.1416e+07	8.4002e+07	8.80933e+07	4.93711e+07	7.17597e+07	6.53814e+07	7.57659e+07	8.596e+07	7.72766e+07	7.94076e+07	1.02893e+08	9.35992e+07	7.65188e+07	3.97252e+07	6.57818e+07	7.99917e+07	9.25947e+07	6.39222e+07	8.10344e+07	5.9039e+07	7.92667e+07	6.70851e+07	7.16427e+07	6.76826e+07	8.84567e+07	7.07421e+07
6-Hydroxy-1H-indole-3-acetamide	0.583478	B(iii)			45.4134	191.082	forward	4.04779e+06	4.65264e+06	4.3832e+06	5.89563e+06	6.81694e+06	7.98754e+06	9.34385e+06	6.9813e+06	4.68417e+06	4.02296e+06	5.43703e+06	3.51732e+06	4.44184e+06	7.258e+06	6.91393e+06	5.67189e+06	3.62763e+06	5.40567e+06	5.21873e+06	4.76706e+06	4.70589e+06	5.38301e+06	6.59093e+06	5.63635e+06	5.68222e+06	4.62535e+06	6.39623e+06	4.46928e+06	3.7677e+06	3.54693e+06	6.48913e+06	8.64851e+06	5.11953e+06	5.67035e+06	6.0099e+06	6.08924e+06	6.78038e+06
12-Methyltridecanoic acid	0.58347	B(iii)			205.297	227.201	forward	4.58225e+06	4.73874e+06	4.69975e+06	5.56104e+06	6.09524e+06	6.3148e+06	1.00686e+07	7.05552e+06	4.66205e+06	4.9404e+06	5.92267e+06	4.66269e+06	5.78038e+06	7.92485e+06	7.81941e+06	6.02701e+06	4.48875e+06	4.45026e+06	5.68847e+06	5.45396e+06	5.73623e+06	6.0851e+06	6.13775e+06	4.91862e+06	5.44825e+06	5.01285e+06	5.92088e+06	5.05327e+06	5.30909e+06	5.45616e+06	5.31926e+06	5.94307e+06	6.12163e+06	5.95385e+06	6.58541e+06	6.11531e+06	6.23973e+06
Paraoxon	0.58328	B(iii)			334.764	276.065	forward	3.22906e+06	3.08944e+06	3.01495e+06	3.90723e+06	2.982e+06	4.25186e+06	5.46771e+06	3.14962e+06	2.90389e+06	3.86924e+06	4.70253e+06	4.26097e+06	2.72325e+06	4.64546e+06	2.89548e+06	2.83181e+06	2.47966e+06	1.4193e+06	2.94503e+06	3.28621e+06	3.54646e+06	3.78989e+06	3.57314e+06	4.26464e+06	2.87009e+06	3.61646e+06	2.60813e+06	3.65389e+06	3.21858e+06	2.883e+06	2.89687e+06	2.99941e+06	3.41395e+06	2.8628e+06	3.40451e+06	2.39775e+06	1.75848e+06
PC(P-18:1(11Z)/22:2(13Z,16Z))	0.582378	B(iii)			160.912	824.65	forward	1.03382e+06	2.32981e+06	1.94627e+06	2.63649e+06	1.9926e+06	3.01513e+06	468676	3.14369e+06	449215	0	1.06727e+06	727646	327420	780756	768627	407590	2.08909e+06	1.76609e+06	1.05905e+06	3.89052e+06	2.90904e+06	5.18362e+06	2.06931e+06	2.42828e+06	591738	0	508122	1.18755e+06	912812	1.00468e+06	390907	4.40732e+06	957645	1.42397e+06	900638	506638	1.76844e+06
1-Methylhistamine	0.582296	B(iii)			439.648	126.103	forward	4.17872e+06	3.89862e+06	4.8577e+06	4.50221e+06	3.81415e+06	3.75626e+06	5.55567e+06	3.42669e+06	4.56771e+06	4.73164e+06	4.91028e+06	3.94411e+06	3.91141e+06	5.02906e+06	4.08888e+06	4.35151e+06	5.48937e+06	5.37502e+06	5.00859e+06	4.82467e+06	6.2962e+06	4.62936e+06	4.40365e+06	5.58379e+06	4.49521e+06	4.42488e+06	4.31095e+06	4.12828e+06	4.3295e+06	4.25472e+06	4.58564e+06	4.96878e+06	3.83188e+06	5.61881e+06	4.48621e+06	4.69949e+06	4.3093e+06
Linoelaidic acid	0.581266	B(iii)			37.3892	279.233	forward	1.5765e+08	8.18954e+08	5.53428e+08	7.60847e+08	6.79653e+07	9.45879e+08	9.54953e+08	5.50367e+08	8.49781e+08	2.27083e+08	1.15825e+08	1.9796e+08	6.31861e+08	2.65496e+08	4.16456e+08	4.36217e+08	1.19556e+09	4.82939e+08	9.27641e+08	7.11822e+08	2.72547e+08	1.32156e+09	9.98348e+08	8.18861e+08	2.47049e+09	1.11954e+08	4.62599e+08	2.7079e+08	4.80022e+07	6.99217e+08	7.23157e+08	1.42655e+09	9.86882e+08	1.05178e+09	9.77723e+08	1.01491e+09	1.0997e+09
Ethyl tetradecanoate	0.581117	B(iii)			37.3111	255.233	forward	5.57033e+08	2.07263e+09	1.26957e+09	1.46662e+09	1.11024e+09	1.37288e+09	3.88083e+09	1.4936e+09	2.11431e+09	1.0247e+09	4.36545e+08	5.4169e+08	1.12364e+09	6.53438e+08	7.46327e+08	2.43487e+09	1.72053e+09	1.06866e+09	1.68016e+09	1.3509e+09	5.16279e+08	9.61007e+08	2.99596e+09	1.48827e+09	5.71503e+09	4.37235e+08	9.21159e+08	1.28973e+09	7.82627e+08	1.1003e+09	1.90718e+09	2.00603e+09	2.71211e+09	2.89418e+09	2.69426e+09	2.81629e+09	2.95677e+09
Resveratrol	0.58102	B(iii)			335.889	227.067	forward	4.49571e+06	1.19357e+07	9.1625e+06	1.70996e+07	1.32771e+07	1.48499e+07	1.84754e+07	9.66322e+06	1.26508e+07	6.20671e+06	1.01706e+07	1.6515e+07	1.25019e+07	1.65006e+07	8.06239e+06	4.90402e+06	1.10919e+07	2.1068e+06	1.08082e+07	1.41234e+07	1.45771e+07	1.17974e+07	7.05562e+06	1.59928e+07	7.50687e+06	1.26437e+07	1.03127e+07	1.34054e+07	1.38469e+07	1.02586e+07	9.12842e+06	1.00607e+07	1.30142e+07	5.95776e+06	5.13406e+06	1.37521e+07	1.38679e+07
S-Adenosylhomocysteine	0.580889	B(iii)			337.733	383.12	forward	1.99683e+06	3.28251e+06	1.39998e+06	3.92554e+06	1.97451e+06	3.13345e+06	1.46551e+06	2.77556e+06	1.98127e+06	3.9544e+06	4.15537e+06	3.64134e+06	4.07591e+06	1.73231e+06	3.58375e+06	4.89038e+06	861188	4.18786e+06	4.16945e+06	2.30641e+06	2.1637e+06	5.87435e+06	3.61441e+06	4.35983e+06	1.23589e+07	3.16662e+06	3.94452e+06	1.04133e+07	1.36674e+06	4.523e+06	2.46096e+06	4.36124e+06	3.40528e+06	2.69413e+06	3.38502e+06	5.9865e+06	2.98381e+06
Hypericin	0.579057	B(iii)			153.605	503.082	forward	1.23552e+06	1.14499e+06	1.6894e+06	2.17766e+06	1.71569e+06	2.64492e+06	1.18954e+06	2.07496e+06	1.48301e+06	3.52214e+06	2.3031e+06	2.14709e+06	3.59805e+06	985030	3.73034e+06	3.67258e+06	845480	1.32494e+06	3.5234e+06	1.80029e+06	1.91437e+06	4.65797e+06	2.86251e+06	3.87264e+06	4.57111e+06	2.2502e+06	2.10078e+06	4.67227e+06	1.47662e+06	3.30314e+06	1.35738e+06	3.41349e+06	2.78849e+06	2.61134e+06	1.69749e+06	2.30906e+06	1.62945e+06
2,3-Dihydroxybutanedioic acid	0.57752	B(iii)			29.0867	149.009	forward	8.33635e+06	5.43303e+06	6.43205e+06	5.91332e+06	7.54885e+06	6.27729e+06	1.3218e+07	5.19325e+06	6.67078e+06	5.46172e+06	4.66569e+06	4.62354e+06	8.30189e+06	429976	8.92233e+06	6.02829e+06	5.44444e+06	7.6751e+06	6.05095e+06	5.70888e+06	5.5516e+06	7.86263e+06	1.31134e+07	9.88445e+06	5.33114e+06	9.05567e+06	6.0057e+06	7.44663e+06	5.39806e+06	7.92879e+06	7.46832e+06	5.38161e+06	2.78496e+08	2.74977e+08	2.82182e+08	2.98252e+08	3.01049e+08
Lysyl-Alanine	0.576145	B(iii)			544.563	218.15	forward	3.27222e+07	1.23593e+07	4.38591e+07	4.03932e+07	1.48545e+07	1.92485e+07	6.70517e+06	4.78151e+07	3.2008e+07	2.49659e+07	3.16809e+07	2.28471e+07	1.41956e+07	7.01943e+07	2.29135e+07	2.59565e+07	2.59544e+07	6.35953e+06	2.2202e+07	2.36782e+07	2.03294e+07	2.47628e+07	2.59317e+07	8.86325e+06	7.59249e+06	3.88398e+07	3.40643e+06	1.13184e+07	7.49459e+06	6.97861e+06	2.4713e+07	7.81997e+06	1.35919e+07	2.56708e+07	2.44847e+07	2.63825e+07	2.81889e+07
L-3-Phenyllactic acid	0.575757	B(iii)			100.656	165.055	forward	3.01413e+06	6.86494e+06	2.67695e+06	2.75508e+06	2.03365e+07	1.04347e+07	5.47907e+06	1.51389e+07	3.94133e+06	1.9729e+06	4.53702e+06	3.52099e+06	3.93835e+06	2.15306e+06	4.35244e+06	3.34415e+06	3.31982e+06	3.73133e+06	4.99222e+06	2.66472e+06	1.03855e+07	3.34121e+06	1.24703e+07	2.85359e+06	1.95687e+07	1.27713e+07	3.5511e+06	1.7818e+07	4.02621e+06	4.07973e+06	1.31522e+07	5.31235e+06	3.89231e+06	7.78464e+06	3.8134e+06	3.69921e+06	4.93411e+06
Cohibin A	0.57557	B(iii)			211.736	549.488	forward	0	12400.2	0	0	110658	0	175369	67260.6	222551	156949	166617	145803	180142	96842.5	43271.5	27365.3	0	16051.6	0	37585.8	38614.8	23902.5	25313	0	218610	168713	235303	155986	184298	161942	169533	0	72976.9	72828	42082.9	52237.4	24334
6-Hydroxy-5-methoxyindole glucuronide	0.575461	B(iii)			225.438	340.107	forward	197633	271758	150665	364532	365310	164072	381129	203121	290503	228445	237338	362300	388583	339847	209785	267069	174481	272747	206464	173498	225686	302569	232861	257222	356123	242885	370952	403070	368505	196972	269520	142233	251737	201420	272861	330694	239158
D-Glycero-D-galacto-heptitol	0.573609	B(iii)			308.611	235.08	forward	853535	745981	842355	922064	1.1651e+06	877391	457366	750624	590446	1.09818e+06	449611	623534	674258	1.05207e+06	599047	956609	1.00198e+06	861881	987109	702939	747699	745056	539911	738206	986913	984693	841560	589873	1.06277e+06	1.05589e+06	709843	827259	875605	688678	808381	565328	623442
3-Hydroxy-5Z-octenyl acetate	0.572807	B(iii)			38.5222	187.133	forward	742224	904042	925417	877910	3.42277e+06	1.50605e+06	1.06404e+06	1.24636e+06	422472	975849	952770	949445	924095	1.16224e+06	884863	1.13379e+06	1.12737e+06	1.01189e+06	1.04439e+06	1.50231e+06	613479	955218	1.69345e+06	674105	1.62821e+06	931754	874223	1.33907e+06	671126	1.373e+06	1.42822e+06	1.10073e+06	1.1974e+06	1.35293e+06	1.31234e+06	1.25555e+06	1.41173e+06
Nicotinic acid	0.572592	B(iii)			439.678	122.021	forward	5.91408e+06	6.68732e+06	5.78386e+06	7.25499e+06	6.79025e+06	6.47769e+06	5.43709e+06	5.52387e+06	6.35827e+06	6.37693e+06	7.11896e+06	7.00901e+06	6.90292e+06	6.57838e+06	5.95718e+06	7.05775e+06	5.43996e+06	5.66512e+06	5.6628e+06	5.9528e+06	7.03383e+06	5.87242e+06	6.40665e+06	6.58283e+06	5.59074e+06	5.17619e+06	6.85188e+06	7.7132e+06	5.72353e+06	7.0276e+06	6.20203e+06	6.8036e+06	5.68741e+06	6.11769e+06	7.3079e+06	8.04867e+06	6.27033e+06
PC(16:1(9Z)/P-18:0)	0.571481	B(iii)			145.184	744.591	forward	4.67269e+08	4.25529e+08	4.4934e+08	5.08563e+08	3.15202e+08	2.09467e+08	6.68338e+08	4.38844e+08	4.5584e+08	4.14977e+08	2.35282e+08	3.63634e+08	3.69925e+08	4.87477e+08	3.12528e+08	5.06139e+08	3.13172e+08	4.69142e+08	4.88818e+08	3.33201e+08	4.41035e+08	5.18684e+08	3.39599e+08	2.95943e+08	1.17401e+08	2.86895e+08	3.39825e+08	4.67365e+08	2.53846e+08	2.89548e+08	3.04595e+08	3.70663e+08	4.26136e+08	3.62988e+08	2.32831e+08	3.76891e+08	3.84492e+08
PC(20:5(5Z,8Z,11Z,14Z,17Z)/P-18:0)	0.571126	B(iii)			162.076	792.59	forward	1.25333e+08	1.0213e+08	1.37291e+08	9.76789e+07	2.49383e+08	1.36507e+08	4.23985e+08	1.34536e+08	3.79625e+08	4.91793e+08	4.05039e+08	2.75035e+08	3.70286e+08	4.97673e+08	3.62694e+08	3.38562e+08	1.54097e+08	1.3785e+08	1.46942e+08	1.12444e+08	1.32633e+08	2.41363e+08	1.41782e+08	1.25669e+08	1.83229e+08	3.21386e+08	3.23707e+08	3.44711e+08	3.30006e+08	3.91238e+08	3.60884e+08	7.69218e+07	2.6517e+08	2.71932e+08	2.69139e+08	2.67358e+08	2.82232e+08
Iminoerythrose 4-phosphate	0.570335	B(iii)			420.226	200.032	forward	1.45532e+06	3.25899e+06	2.2128e+06	2.68216e+06	2.36796e+06	3.8723e+06	3.61442e+06	1.59782e+06	3.47378e+06	1.84557e+06	1.39004e+06	2.69279e+06	1.89419e+06	3.61567e+06	3.10065e+06	2.52406e+06	1.99556e+06	2.12466e+06	3.07292e+06	2.76167e+06	4.63667e+06	2.54874e+06	3.26373e+06	2.328e+06	1.7617e+06	1.93002e+06	1.68971e+06	1.89402e+06	2.12514e+06	2.74856e+06	1.94105e+06	2.41417e+06	2.28976e+06	2.33158e+06	2.38859e+06	2.37803e+06	2.42248e+06
3-Isoxazolidinone	0.568623	B(iii)			309.731	88.0398	forward	4.11795e+07	3.02723e+07	4.63762e+07	3.18853e+07	3.39171e+07	3.9817e+07	3.48948e+07	3.62907e+07	2.89603e+07	3.67829e+07	3.50135e+07	4.34723e+07	3.36997e+07	3.50309e+07	3.79721e+07	3.80049e+07	3.85066e+07	3.61532e+07	3.70347e+07	3.34808e+07	2.31273e+07	3.69613e+07	3.07889e+07	2.84014e+07	3.62655e+07	3.63705e+07	2.91306e+07	2.9015e+07	3.45036e+07	3.44537e+07	3.55988e+07	4.59435e+07	2.81921e+07	3.65268e+07	2.8923e+07	3.17235e+07	3.39486e+07
L-Threonine	0.567805	B(iii)			61.4682	120.066	forward	2.19996e+06	2.14992e+06	2.06941e+06	2.49511e+06	1.84716e+06	1.87994e+06	1.89307e+06	1.97935e+06	2.43483e+06	2.03714e+06	2.31795e+06	1.97446e+06	1.96811e+06	2.77141e+06	2.27146e+06	2.39333e+06	1.65595e+06	2.60962e+06	1.74479e+06	2.26787e+06	3.30881e+06	1.81294e+06	2.21647e+06	1.84202e+06	2.7728e+06	2.26604e+06	2.18083e+06	2.42717e+06	2.13143e+06	1.95266e+06	1.8242e+06	1.81664e+06	2.16317e+06	2.11734e+06	2.31119e+06	2.20976e+06	2.3772e+06
PC(20:2(11Z,14Z)/P-18:0)	0.567191	B(iii)			163.152	798.628	forward	4.30655e+06	6.05335e+06	4.532e+06	7.74563e+06	3.96767e+06	6.85865e+06	2.35209e+06	6.25975e+06	1.19673e+06	987051	1.3648e+06	2.80849e+06	846392	3.65033e+06	2.05551e+06	5.50193e+06	3.90545e+06	4.57479e+06	4.10936e+06	6.94805e+06	5.88892e+06	1.19995e+07	3.91467e+06	5.97911e+06	1.6311e+06	1.94468e+06	3.07776e+06	4.17796e+06	2.23797e+06	2.16934e+06	433991	5.61376e+06	2.77266e+06	2.08894e+06	2.12856e+06	5.05258e+06	4.0566e+06
Dieporeticenin	0.566926	B(iii)			29.4614	573.489	forward	437694	504131	464902	504271	585929	661669	577307	375569	474382	407523	504248	436172	604457	438550	347649	424106	611159	336580	514931	593881	453390	777976	613091	732814	1.24079e+06	275017	796638	517990	415070	564581	490186	767673	201099	272189	341649	451767	336877
LysoPC(22:6(4Z,7Z,10Z,13Z,16Z,19Z))	0.566144	B(iii)			208.295	568.341	forward	99789.1	246211	148758	63812.9	341900	79540.7	1.27971e+06	57591.9	506823	627399	688285	485161	548723	780937	433813	456971	170033	283261	152649	304211	213549	276454	168181	264045	1.48421e+06	611531	540714	648109	1.08505e+06	611123	598666	122214	476644	589067	546731	539524	591032
2-Furoylglycine	0.564771	B(iii)			153.619	168.033	forward	1.21064e+07	1.8285e+07	1.45282e+07	1.50114e+07	1.0703e+07	9.769e+06	1.84958e+07	9.17601e+06	1.74595e+07	1.09595e+07	9.59522e+06	1.72785e+07	9.34455e+06	9.1551e+06	1.80153e+07	1.31072e+07	9.92222e+06	7.10848e+06	1.04529e+07	1.04765e+07	1.6683e+07	1.46281e+07	1.30384e+07	9.58431e+06	2.75552e+07	1.29913e+07	9.79491e+06	1.48312e+07	1.28249e+07	1.44866e+07	1.24189e+07	1.84936e+07	1.51893e+07	1.51814e+07	1.56616e+07	1.54305e+07	1.50724e+07
AICA-riboside	0.561278	B(iii)			442.41	259.104	forward	9.40947e+06	2.27756e+07	8.70878e+06	1.06093e+07	1.02417e+07	1.22806e+07	9.10736e+06	1.18705e+07	1.01965e+07	1.11571e+07	8.59288e+06	5.67536e+06	9.82998e+06	1.13493e+07	1.02578e+07	9.64887e+06	1.03214e+07	8.0173e+06	9.02481e+06	7.64692e+06	9.87363e+06	1.04051e+07	6.72115e+06	7.40751e+06	7.7201e+06	9.77387e+06	9.88228e+06	6.62692e+06	1.92271e+07	6.15636e+06	8.14412e+06	7.92699e+06	8.43032e+06	8.58627e+06	8.95245e+06	8.67692e+06	9.32896e+06
Fexofenadine	0.560267	B(iii)			214.544	500.279	forward	2.51554e+06	2.60693e+06	2.22686e+06	2.07744e+06	2.24615e+06	2.83827e+06	1.57287e+06	2.08928e+06	1.32647e+06	1.59621e+06	1.41363e+06	1.34991e+06	1.59685e+06	1.57058e+06	1.33871e+06	2.35359e+06	2.47311e+06	2.55702e+06	2.56789e+06	2.7758e+06	2.45378e+06	2.46458e+06	2.06845e+06	2.40637e+06	4.271e+06	1.43149e+06	2.00836e+06	1.30228e+06	1.26253e+06	1.47508e+06	1.02561e+06	2.34735e+06	2.9643e+06	3.49116e+06	3.16268e+06	3.71538e+06	3.94411e+06
2-Methylglutaric acid	0.560255	B(iii)			75.4643	145.05	forward	7.37986e+06	7.53239e+06	6.8606e+06	7.57173e+06	6.65885e+06	9.17108e+06	1.23637e+07	9.24837e+06	8.13017e+06	1.6909e+07	8.20185e+06	5.88686e+06	9.08492e+06	7.72962e+06	1.16217e+07	1.00278e+07	9.69185e+06	6.72881e+06	7.99179e+06	8.7438e+06	1.34603e+07	1.23065e+07	8.21208e+06	9.62358e+06	1.88995e+07	6.46209e+06	9.84895e+06	1.09261e+07	6.71608e+06	8.30182e+06	1.0028e+07	7.69325e+06	7.03699e+06	8.32541e+06	7.82366e+06	8.81462e+06	8.85728e+06
Tangeritin	0.56016	B(iii)			562.861	353.098	forward	1.53089e+06	1.43637e+06	1.66211e+06	1.4171e+06	1.30154e+06	1.39536e+06	1.26033e+06	1.51529e+06	1.38174e+06	1.58832e+06	1.36876e+06	1.38453e+06	1.35326e+06	1.63856e+06	1.37047e+06	1.33687e+06	1.6203e+06	1.38836e+06	1.47333e+06	1.39686e+06	1.53922e+06	1.57547e+06	1.614e+06	1.56033e+06	1.31716e+06	1.58081e+06	1.40209e+06	1.55398e+06	1.5473e+06	1.46671e+06	1.59318e+06	1.3646e+06	1.50778e+06	1.52643e+06	1.49367e+06	1.52147e+06	1.42652e+06
4-Hydroxyphenylpyruvic acid	0.560117	B(iii)			109.17	179.034	forward	484541	9.91913e+06	3.023e+06	1.86044e+06	874134	2.47005e+07	1.41761e+06	2.44529e+06	1.50799e+06	1.4806e+06	1.16409e+06	1.54434e+06	2.3416e+06	1.48283e+06	1.29489e+06	841331	3.62513e+07	1.33261e+06	2.37627e+06	5.27016e+06	638397	2.8332e+06	1.22249e+07	1.61299e+06	4.1237e+07	1.20124e+06	9.20891e+06	1.18693e+06	1.81518e+07	2.4896e+07	1.95931e+07	1.52586e+06	9.396e+06	7.51287e+06	8.97662e+06	7.87175e+06	8.77029e+06
D-Alanyl-D-alanine	0.558995	B(iii)			425.124	161.092	forward	3.07905e+08	2.30845e+08	3.3224e+08	3.29757e+08	2.86407e+08	2.33171e+08	1.76724e+08	4.17652e+08	2.61724e+08	2.80184e+08	2.06959e+08	1.29984e+08	3.08258e+08	3.35015e+08	2.6313e+08	3.75403e+08	3.66054e+08	3.62126e+08	3.80665e+08	2.39353e+08	3.14094e+08	3.30363e+08	2.72479e+08	2.53309e+08	1.73554e+08	3.30441e+08	1.64708e+08	2.59888e+08	1.95345e+08	2.42057e+08	3.29311e+08	2.1978e+08	2.42029e+08	2.93178e+08	2.92752e+08	3.01396e+08	2.94526e+08
Carotamine	0.558147	B(iii)			439.652	272.099	forward	1.1186e+06	1.01567e+06	1.27877e+06	1.07529e+06	1.27849e+06	1.35659e+06	1.14115e+06	1.24201e+06	1.16163e+06	1.01443e+06	967067	1.12118e+06	956857	1.1736e+06	1.23281e+06	899015	1.31121e+06	1.12732e+06	1.38807e+06	1.24559e+06	1.01625e+06	1.27725e+06	1.28251e+06	1.18646e+06	1.26919e+06	1.22925e+06	1.10396e+06	1.03477e+06	1.24841e+06	1.04653e+06	1.40088e+06	1.26889e+06	1.22475e+06	1.23772e+06	1.27158e+06	1.38912e+06	1.16453e+06
PC(18:1(9Z)/18:1(11Z))	0.555659	B(iii)			111.889	786.601	forward	3.81726e+08	1.57336e+08	4.85056e+08	7.8358e+07	1.20433e+08	5.40492e+08	1.9978e+08	1.66631e+08	2.986e+08	1.32999e+08	6.66458e+07	1.17529e+08	3.56575e+08	8.94346e+07	2.11487e+08	1.90705e+08	1.7238e+08	1.47108e+08	1.32697e+08	1.6403e+08	1.99959e+08	1.38664e+08	1.76582e+08	4.93184e+08	2.73209e+08	1.28368e+08	1.00491e+08	8.86061e+07	1.33541e+08	2.13837e+08	1.157e+08	1.20538e+08	2.11411e+08	1.1677e+08	1.59356e+08	1.32118e+08	1.9495e+08
2-(Methylthiomethyl)-3-phenyl-2-propenal	0.554161	B(iii)			155.287	193.072	forward	6.43949e+06	1.1355e+07	1.46941e+07	4.19148e+06	8.74505e+06	6.28243e+06	8.95012e+06	1.85861e+07	1.05188e+07	5.57412e+06	3.30229e+06	2.48365e+06	9.13135e+06	5.34075e+06	1.03272e+07	1.15324e+07	1.1994e+07	8.12577e+06	1.07743e+07	7.3319e+06	8.15523e+06	1.21637e+07	1.80457e+07	1.13533e+07	4.30014e+06	1.17011e+07	4.8948e+06	5.57126e+06	7.04382e+06	5.20113e+06	1.25105e+07	5.64141e+06	1.25437e+07	1.59948e+07	1.49063e+07	8.75679e+06	9.2815e+06
3-(4-Hydroxyphenyl)-1-propanol	0.552957	B(iii)			32.837	153.091	forward	5.6955e+06	3.97578e+06	4.75713e+06	9.74537e+06	3.22309e+06	5.49013e+06	5.96092e+06	6.6352e+06	1.86783e+06	4.01947e+06	5.53152e+06	1.09858e+07	3.60979e+06	5.94723e+06	5.02434e+06	6.32437e+06	3.57857e+06	4.64217e+06	4.98456e+06	7.14882e+06	2.82545e+06	4.62061e+06	1.07828e+07	4.37721e+06	3.45964e+06	4.90987e+06	5.51307e+06	5.85623e+06	2.92578e+06	7.60412e+06	1.23891e+07	4.93624e+06	1.02289e+07	1.13667e+07	1.03161e+07	1.05629e+07	1.39256e+07
IDP	0.552805	B(iii)			457.797	427.006	forward	1.31756e+06	1.0821e+06	1.04936e+06	859602	1.43516e+06	1.08541e+06	853035	1.11102e+06	1.07801e+06	660575	1.34135e+06	1.53338e+06	1.3184e+06	1.10311e+06	1.2247e+06	1.86382e+06	895278	1.92082e+06	867787	896788	772755	503532	992854	690491	304090	595599	853120	516630	546947	1.06748e+06	800915	943253	1.1868e+06	1.07021e+06	1.11753e+06	1.05901e+06	1.12811e+06
Asitrilobin C	0.552156	B(iii)			166.473	625.519	forward	133370	0	106710	360046	890311	371527	1.06397e+06	0	1.29098e+06	1.26792e+06	1.48975e+06	582520	1.40864e+06	773451	751643	128921	115732	141323	80172.5	100976	94609	402208	0	220496	2.34009e+06	1.45468e+06	1.05313e+06	1.21464e+06	1.24211e+06	730463	952510	106156	523269	558478	567190	770143	688344
2,4-Diamino-6-nitrotoluene	0.552038	B(iii)			317.644	168.077	forward	3.47143e+06	3.74646e+06	4.1912e+06	2.49953e+06	4.01619e+06	3.55599e+06	3.66721e+06	2.95744e+06	3.59295e+06	4.75705e+06	2.51856e+06	2.16827e+06	2.21774e+06	1.70452e+06	3.29962e+06	2.61143e+06	2.62448e+06	2.1024e+06	2.93024e+06	2.34299e+06	2.01663e+06	1.53604e+06	1.79037e+06	1.95174e+06	2.10784e+06	4.15203e+06	3.93462e+06	2.89579e+06	4.33844e+06	3.37222e+06	3.09559e+06	1.7677e+06	2.1313e+06	2.78878e+06	4.8897e+06	3.03887e+06	3.60238e+06
6beta-Hydroxytestosterone	0.551119	B(iii)			28.7608	303.2	forward	2.31866e+06	3.4012e+06	2.34277e+06	1.64792e+06	1.40473e+06	2.57869e+06	2.07278e+06	6.84087e+06	3.28751e+06	2.26858e+06	1.7707e+06	2.29031e+06	1.30821e+06	1.88723e+06	3.88611e+06	1.10827e+07	2.59642e+06	2.10809e+06	4.2672e+06	2.14285e+06	3.55173e+06	5.31525e+06	2.99081e+06	1.22202e+06	2.15469e+07	2.50793e+06	3.56433e+06	1.60986e+06	4.37292e+06	2.1131e+06	2.1548e+06	2.75196e+06	4.37981e+06	3.55188e+06	3.90105e+06	3.80725e+06	4.45401e+06
Glutamylthreonine	0.551095	B(iii)			407.305	247.094	forward	346127	103851	392870	1.76522e+06	362666	115159	66567.1	63598.8	91592.3	595214	199615	321537	383853	1.4432e+06	126969	549358	231440	154081	202571	172619	1.18527e+06	318368	107408	387650	333224	774579	162778	640472	199831	611185	812070	120804	396374	398313	419051	427002	384531
LysoPC(16:0)	0.549705	B(iii)			218.985	496.34	forward	2.81542e+07	4.65071e+07	2.51347e+07	2.03476e+07	3.4148e+07	3.38199e+07	7.16937e+07	1.88321e+07	3.80471e+07	3.43611e+07	4.24632e+07	3.50128e+07	3.87177e+07	3.55036e+07	3.76564e+07	2.97905e+07	2.87515e+07	4.32064e+07	2.34348e+07	2.27395e+07	2.90953e+07	3.11617e+07	3.58985e+07	3.39001e+07	1.07319e+08	3.8312e+07	5.12749e+07	5.17044e+07	5.35455e+07	4.18996e+07	2.42128e+07	4.04796e+07	3.5204e+07	4.32968e+07	3.93894e+07	3.97071e+07	4.47184e+07
Leucyl-Gamma-glutamate	0.548656	B(iii)			544.542	260.161	forward	4.69653e+06	1.73679e+06	6.72607e+06	6.54619e+06	1.90123e+06	2.46619e+06	894139	8.17262e+06	4.25052e+06	3.53337e+06	4.56804e+06	3.12673e+06	2.03272e+06	1.08468e+07	3.37379e+06	3.97682e+06	3.75228e+06	1.08136e+06	3.63239e+06	3.43658e+06	2.68495e+06	3.66848e+06	3.72016e+06	1.0459e+06	1.22234e+06	6.04763e+06	688800	1.60723e+06	1.08288e+06	987521	3.73487e+06	1.14831e+06	1.82017e+06	3.85886e+06	3.65262e+06	3.97247e+06	4.12335e+06
8-Hydroxy-7-methoxy-2H-1-benzopyran-2-one	0.548447	B(iii)			60.8946	193.05	forward	2.16433e+06	3.20012e+06	3.21935e+06	2.24014e+06	1.3886e+06	7.9154e+06	1.56029e+06	1.90241e+06	1.82595e+06	1.55841e+06	1.63369e+06	1.92601e+06	1.63677e+06	1.96609e+06	1.5291e+06	1.7392e+06	9.72284e+06	2.0661e+06	1.969e+06	1.50927e+06	2.09973e+06	1.4352e+06	4.02538e+06	2.15069e+06	1.69384e+07	1.47794e+06	3.5596e+06	1.37437e+06	1.61448e+07	1.08622e+07	7.40235e+06	1.87732e+06	1.99387e+06	2.22168e+06	2.93649e+06	2.13789e+06	1.93835e+06
Diepomuricanin A	0.547901	B(iii)			29.4645	547.473	forward	529683	4.51409e+06	339610	512075	7.28787e+06	5.50679e+06	417515	264951	9.23439e+06	6.17267e+06	709460	5.8582e+06	6.46428e+06	510809	7.66517e+06	335386	447756	5.58194e+06	470604	3.46731e+06	4.3705e+06	332013	5.10589e+06	468063	1.06479e+06	420221	551858	528061	488390	609306	5.95539e+06	514638	5.51556e+06	5.41322e+06	415423	381617	4.80546e+06
L-Aspartic acid	0.547197	B(iii)			415.415	132.029	forward	1.1614e+07	1.77181e+07	1.41786e+07	2.29712e+07	1.75179e+07	1.95672e+07	2.09064e+07	1.32939e+07	1.99321e+07	1.06312e+07	1.78585e+07	1.25712e+07	1.85396e+07	1.78737e+07	1.60584e+07	1.38076e+07	9.86109e+06	1.40237e+07	1.03781e+07	1.42188e+07	1.99999e+07	1.48102e+07	1.77212e+07	1.96042e+07	1.28435e+07	1.48871e+07	1.59029e+07	2.30206e+07	1.95318e+07	1.39607e+07	1.08777e+07	1.25598e+07	1.80439e+07	1.60355e+07	1.61856e+07	1.65946e+07	1.70749e+07
Hydroxypyruvic acid	0.546985	B(iii)			292.14	103.003	forward	2.97563e+06	2.90289e+06	1.60084e+06	4.29116e+06	3.98776e+06	3.56492e+06	3.98017e+06	3.12498e+06	2.95972e+06	2.03897e+06	3.50731e+06	3.56516e+06	4.11079e+06	3.8983e+06	3.17366e+06	3.28178e+06	2.6474e+06	4.00222e+06	2.61227e+06	2.44224e+06	3.7144e+06	3.52136e+06	3.16323e+06	1.96967e+06	2.67996e+06	3.25006e+06	3.97373e+06	4.09672e+06	2.91547e+06	3.65887e+06	2.47235e+06	2.9855e+06	3.08428e+06	3.41322e+06	3.48855e+06	3.84203e+06	4.07244e+06
(2E,4E,6Z)-2,4,6-Decatrienoic acid dehydropiperidide	0.546835	B(iii)			572.717	232.166	forward	3.04035e+07	7.44122e+06	1.34183e+07	2.72066e+07	8.91789e+06	3.33762e+06	2.17602e+06	3.59775e+07	4.80107e+07	1.16686e+07	1.64923e+07	2.85001e+07	7.13575e+06	3.87881e+07	2.63647e+06	7.57701e+06	1.68316e+07	8.23291e+06	3.57641e+06	1.6848e+07	6.33901e+06	1.10766e+07	1.65936e+07	4.82341e+06	3.42189e+06	2.27604e+07	7.46005e+06	1.1064e+07	1.00693e+07	2.94042e+06	1.24454e+07	4.17748e+06	7.41863e+06	1.3356e+07	1.42726e+07	1.5222e+07	1.55154e+07
Lupulone	0.544434	B(iii)			193.653	415.285	forward	250856	239971	369749	218896	551947	355442	571818	131797	252778	549086	469411	684193	623951	843860	562799	654025	238020	229412	396813	340624	236962	111783	110643	300313	434533	906838	961459	698832	255911	626587	435073	153410	1.7318e+06	1.55283e+06	1.62563e+06	1.59029e+06	1.2837e+06
Viniferal	0.541798	B(iii)			453.344	575.162	forward	2.21303e+06	3.09969e+06	4.14365e+06	2.7088e+06	2.8715e+06	3.08242e+06	2.79755e+06	3.10443e+06	2.60068e+06	3.0793e+06	2.39994e+06	1.64328e+06	2.27376e+06	3.45989e+06	2.72934e+06	2.93488e+06	2.71118e+06	2.99872e+06	3.97078e+06	2.82974e+06	3.52016e+06	2.64794e+06	3.40703e+06	3.36208e+06	1.87321e+06	3.12623e+06	2.68616e+06	2.92597e+06	2.89661e+06	3.0355e+06	2.64499e+06	2.42725e+06	3.09418e+06	3.21064e+06	3.55392e+06	3.32014e+06	3.00207e+06
1-(Hydroxymethyl)-5,5-dimethyl-2,4-imidazolidinedione	0.538567	B(iii)			413.595	159.077	forward	5.01646e+06	6.77469e+06	5.25674e+06	7.91713e+06	6.42725e+06	7.28204e+06	8.49151e+06	6.12478e+06	1.23788e+07	6.01416e+06	6.84068e+06	7.63753e+06	6.80349e+06	8.99941e+06	7.50284e+06	9.88039e+06	3.97358e+06	7.18368e+06	5.76083e+06	6.69133e+06	1.32786e+07	7.24118e+06	7.89055e+06	8.00381e+06	6.7139e+06	7.09154e+06	6.72723e+06	6.75696e+06	9.28672e+06	8.05731e+06	5.14124e+06	6.23237e+06	6.88924e+06	7.75211e+06	7.81177e+06	8.15454e+06	8.48098e+06
Oxonantenine	0.536359	B(iii)			411.219	336.088	forward	395043	1.6264e+06	695377	718452	1.95469e+06	1.69319e+06	1.92882e+06	533023	2.46942e+06	452651	330883	1.21187e+06	1.2536e+06	1.04449e+06	1.57377e+06	1.46671e+06	1.10966e+06	851635	1.56852e+06	1.47962e+06	2.34342e+06	986799	1.66075e+06	1.60669e+06	1.3004e+06	1.10374e+06	1.2055e+06	1.77562e+06	1.91452e+06	1.90827e+06	880296	471721	1.37317e+06	1.11143e+06	1.26184e+06	1.45882e+06	1.48793e+06
N-a-Acetylcitrulline	0.535942	B(iii)			451.604	218.114	forward	1.65234e+07	7.16507e+06	7.58799e+06	1.3654e+07	1.12356e+07	1.38622e+07	1.00072e+07	9.17725e+06	8.76909e+06	1.11248e+07	1.91435e+07	2.09493e+07	1.30268e+07	1.1855e+07	6.81534e+06	1.23752e+07	7.90333e+06	1.4425e+07	4.13689e+06	1.25012e+07	4.9558e+06	8.4834e+06	4.42743e+06	7.38225e+06	8.76441e+06	5.79835e+06	1.01153e+07	1.80238e+07	8.04852e+06	9.99692e+06	9.79869e+06	9.33821e+06	8.16986e+06	8.74487e+06	8.93591e+06	1.41994e+07	1.52926e+07
PI(20:2(11Z,14Z)/18:2(9Z,12Z))	0.533909	B(iii)			220.399	887.564	forward	731838	483555	637928	417702	587333	454351	342642	583579	640296	655027	404009	660232	440474	572998	598839	435055	505161	503426	396397	470865	672789	520075	550884	168469	329729	444138	513563	290524	479716	643724	739516	593057	409077	715796	303114	349030	451767
O-propanoyl-carnitine	0.53339	B(iii)			347.36	218.139	forward	3.20966e+06	841732	2.3275e+06	3.95471e+06	2.10632e+06	2.49899e+06	4.98274e+06	1.55952e+06	4.74703e+06	4.42224e+06	3.07571e+06	8.30814e+06	2.07995e+06	3.43002e+06	4.5421e+06	2.29428e+06	1.67742e+06	3.11104e+06	1.77902e+06	3.39466e+06	2.94408e+06	2.99807e+06	2.94875e+06	1.93665e+06	3.96834e+06	2.93167e+06	4.2973e+06	5.72954e+06	7.49721e+06	6.62316e+06	2.59553e+06	3.37215e+06	3.41852e+06	3.63789e+06	3.20685e+06	3.77599e+06	3.7522e+06
LysoPC(18:3(6Z,9Z,12Z))	0.531612	B(iii)			219.704	518.322	forward	771588	1.24335e+06	947992	714690	852773	999650	2.27819e+06	423772	895070	918853	1.14402e+06	1.00266e+06	1.06201e+06	946879	718492	684185	966512	1.21947e+06	859733	735099	794279	1.01644e+06	971111	1.1353e+06	2.65117e+06	1.10644e+06	1.32038e+06	467747	1.38604e+06	1.18025e+06	725264	1.03535e+06	1.00088e+06	1.35142e+06	1.15636e+06	1.15486e+06	1.16065e+06
Eugenyl benzoate	0.531489	B(iii)			338.215	269.124	forward	9.00511e+07	1.10111e+08	1.20795e+08	8.76659e+07	1.25666e+08	8.59168e+07	8.89061e+07	1.09413e+08	9.60539e+07	1.18074e+08	8.02469e+07	6.74437e+07	7.78289e+07	1.1775e+08	1.27898e+08	1.10772e+08	1.0342e+08	8.49236e+07	1.30592e+08	8.80068e+07	1.34911e+08	1.12779e+08	1.36313e+08	1.22056e+08	8.10611e+07	1.06201e+08	7.53201e+07	8.79765e+07	8.04707e+07	1.10727e+08	7.27313e+07	9.37247e+07	9.60418e+07	1.18003e+08	1.0937e+08	1.12821e+08	1.17049e+08
m-Coumaric acid	0.531172	B(iii)			56.2276	163.039	forward	1.6166e+07	1.83097e+07	1.53021e+07	1.54696e+07	3.60939e+07	3.30599e+07	3.37496e+07	2.83751e+07	1.45353e+07	1.31717e+07	1.55061e+07	1.93631e+07	1.89582e+07	1.93705e+07	2.66246e+07	1.61482e+07	1.30051e+07	2.75207e+07	1.49434e+07	1.58544e+07	1.91991e+07	1.8947e+07	1.76836e+07	1.64489e+07	2.12835e+07	2.49739e+07	1.90531e+07	1.68255e+07	1.83419e+07	1.69596e+07	3.32076e+07	3.07661e+07	1.98901e+07	2.07855e+07	1.93897e+07	1.97818e+07	1.99845e+07
10,11-Dihydroxycarbamazepine	0.530811	B(iii)			271.726	271.104	forward	2.2778e+06	1.90246e+06	2.8542e+06	1.95618e+06	2.75339e+06	2.50318e+06	3.2847e+06	2.38307e+06	2.56571e+06	3.01452e+06	3.64889e+06	3.26779e+06	1.73012e+06	3.66981e+06	3.01764e+06	276059	2.94565e+06	2.37219e+06	1.92515e+06	312758	2.64179e+06	2.58025e+06	2.25972e+06	2.00427e+06	187529	3.11388e+06	2.63845e+06	2.58742e+06	1.83399e+06	3.36683e+06	3.33894e+06	183829	2.50333e+06	2.84536e+06	2.32458e+06	1.91092e+06	2.28145e+06
PC(18:1(9Z)/P-16:0)	0.528804	B(iii)			169.631	744.59	forward	4.0435e+08	3.90283e+08	2.8531e+08	4.08519e+08	2.29401e+08	2.21808e+08	5.46786e+08	4.20106e+08	4.643e+08	4.19152e+08	2.3543e+08	2.91811e+08	2.5357e+08	4.76172e+08	2.7059e+08	4.94043e+08	2.90859e+08	4.18003e+08	4.94883e+08	3.44763e+08	4.46359e+08	6.22055e+08	2.93044e+08	2.36921e+08	9.85832e+07	2.38879e+08	2.64447e+08	3.87245e+08	2.31413e+08	2.9182e+08	3.10711e+08	2.68062e+08	4.3021e+08	4.40343e+08	4.02338e+08	3.84661e+08	3.99408e+08
Myristicanol A	0.525799	B(iii)			483.417	435.211	forward	464859	961335	1.19256e+06	515711	730823	818674	612476	924868	733568	688760	327728	199213	585254	793864	886463	722819	756615	553391	1.50479e+06	552030	1.34055e+06	1.07372e+06	1.34734e+06	1.44762e+06	683261	1.11053e+06	681302	954010	906828	987269	700782	516519	831595	797482	897496	800377	831155
Palmitoleoyl Ethanolamide	0.525771	B(iii)			32.8545	298.274	forward	2.92826e+07	3.89007e+07	5.18117e+07	5.86351e+07	5.86572e+07	6.98105e+07	4.84792e+07	4.1729e+07	3.09982e+07	4.31351e+07	4.13446e+07	4.93895e+07	3.71978e+07	3.703e+07	3.05645e+07	4.50865e+07	5.08814e+07	4.09896e+07	2.39655e+07	5.00973e+07	2.26353e+07	3.881e+07	3.93923e+07	2.83098e+07	1.33736e+07	3.1268e+07	2.32919e+07	5.40429e+07	2.82929e+07	3.50812e+07	3.82919e+07	2.86969e+07	880807	2.6685e+07	1.00971e+06	2.90243e+07	1.04764e+06
N2-Succinyl-L-ornithine	0.524689	B(iii)			577.357	233.112	forward	355945	799092	679605	349404	738664	746218	731929	570434	368380	644080	490804	351997	663065	397342	825837	586976	642977	690856	899003	594220	689658	724142	649666	811191	792248	578960	718478	455699	787025	831298	673333	819845	675112	594665	514331	509318	523393
Histidinyl-Asparagine	0.523555	B(iii)			361.286	270.12	forward	1.78415e+06	2.16416e+06	3.20204e+06	1.08617e+06	2.75998e+06	2.89903e+06	1.68019e+06	1.95628e+06	1.36807e+06	1.26513e+06	1.16714e+06	1.86447e+06	2.06069e+06	1.07834e+06	4.2954e+06	1.4978e+06	2.19162e+06	2.16619e+06	3.83743e+06	1.9961e+06	2.34563e+06	1.54587e+06	1.59514e+06	2.7463e+06	2.34641e+06	1.94593e+06	3.95007e+06	3.66493e+06	2.52819e+06	1.83459e+06	1.36302e+06	1.97083e+06	2.33267e+06	2.59268e+06	2.19786e+06	2.36487e+06	2.25929e+06
Histidinyl-Aspartate	0.522881	B(iii)			252.646	271.104	forward	2.0158e+07	1.69895e+07	2.75299e+07	2.07662e+07	2.19879e+07	1.97321e+07	1.7368e+07	2.01703e+07	1.97972e+07	2.60298e+07	2.50267e+07	2.08548e+07	2.03021e+07	2.50994e+07	2.69693e+07	2.54023e+07	2.03605e+07	1.70183e+07	2.32791e+07	2.12593e+07	1.85388e+07	2.11976e+07	1.99625e+07	1.89767e+07	2.15175e+07	2.21269e+07	2.04912e+07	2.0113e+07	1.95958e+07	2.37339e+07	1.7698e+07	2.36739e+07	1.63211e+07	2.62485e+07	2.18774e+07	2.27138e+07	2.24776e+07
3-Sulfinato-L-alaninate	0.522164	B(iii)			153.927	152.001	forward	4.39918e+07	6.96443e+07	3.85281e+07	3.8855e+07	4.09876e+07	2.01928e+07	1.38333e+08	5.31006e+07	1.53834e+08	1.56536e+08	8.86664e+07	1.17015e+07	1.11445e+08	4.66152e+07	6.09878e+07	8.7424e+07	5.98834e+07	7.53971e+07	8.40624e+07	1.97542e+08	1.59953e+08	7.40332e+07	8.04104e+07	9.0019e+07	1.71152e+08	6.22062e+07	1.32763e+08	8.32907e+07	1.23697e+08	4.59383e+07	1.54829e+07	4.10984e+07	8.38529e+07	8.50279e+07	8.72903e+07	8.81279e+07	1.05729e+08
4-Deoxyannoreticuin	0.518696	B(iii)			99.3491	581.494	forward	0	0	39086	0	352559	0	920115	0	221220	576316	308949	175410	1.22583e+06	147535	1.10621e+06	102390	0	19907.2	0	0	0	0	0	13738.9	385606	462217	261702	606884	396262	409591	614147	0	248718	210155	242076	294246	205934
6,10,14-Trimethyl-5,9,13-pentadecatrien-2-one	0.51689	B(iii)			32.8479	263.237	forward	6.33532e+06	8.58388e+06	1.09454e+07	1.24548e+07	1.20354e+07	1.44515e+07	1.22288e+07	9.40482e+06	8.37092e+06	8.77893e+06	8.05511e+06	1.01649e+07	8.69685e+06	7.66003e+06	6.05195e+06	1.02062e+07	1.03432e+07	8.38623e+06	5.5961e+06	1.02231e+07	4.9006e+06	8.46028e+06	8.88935e+06	6.48e+06	5.21483e+06	6.56004e+06	4.80102e+06	1.05464e+07	5.76885e+06	7.96115e+06	8.09403e+06	6.52087e+06	5.05916e+06	5.16838e+06	6.80026e+06	5.93356e+06	4.23939e+06
PC(22:6(4Z,7Z,10Z,13Z,16Z,19Z)/18:4(6Z,9Z,12Z,15Z))	0.516084	B(iii)			55.8047	826.56	forward	278791	366958	322896	99175.3	962678	183376	1.30906e+06	445286	899601	996643	1.3838e+06	1.23756e+06	1.03145e+06	788493	1.36039e+06	788414	342970	503251	198067	241185	191443	239559	236740	336349	719711	1.66436e+06	1.33572e+06	847887	1.50259e+06	1.04342e+06	1.0772e+06	335225	645277	921431	616925	577814	799066
Diacetone alcohol	0.513215	B(iii)			64.054	115.075	forward	1.86835e+07	1.74294e+07	1.26493e+07	1.19825e+07	0	8.13191e+06	0	0	9.78256e+06	1.19727e+07	1.34179e+07	1.1735e+07	2.02384e+07	0	0	1.69264e+07	1.97525e+07	2.04838e+07	2.06378e+07	1.26483e+07	1.3006e+07	1.41827e+07	9.91972e+06	1.44211e+07	3.58276e+07	1.43461e+07	2.39446e+07	1.65542e+07	2.06351e+07	2.70906e+07	0	0	9.59323e+06	8.61641e+06	8.71827e+06	8.79803e+06	8.87269e+06
PG(18:2(9Z,12Z)/18:0)	0.512096	B(iii)			87.8028	775.547	forward	2.31776e+06	2.79465e+06	3.21374e+06	2.03564e+06	1.28527e+07	3.21495e+06	5.84752e+06	7.12166e+06	2.91325e+06	1.36266e+07	1.15856e+07	1.1399e+07	5.49193e+06	3.74736e+06	5.26973e+06	4.51795e+06	3.47477e+06	3.23568e+06	6.8553e+06	2.19689e+06	3.21476e+06	3.51847e+06	4.09286e+06	3.0222e+06	4.21743e+06	4.41348e+06	5.59528e+06	5.07683e+06	5.92757e+06	3.42437e+06	4.50505e+06	2.17456e+06	4.45025e+06	4.17439e+06	4.42213e+06	3.57525e+06	3.69864e+06
L-3-Cyanoalanine	0.506346	B(iii)			153.148	113.035	forward	3.48996e+06	1.6952e+06	1.83273e+06	2.54753e+06	1.97158e+06	3.30466e+06	1.97336e+06	4.88607e+06	3.62139e+06	1.55527e+06	2.42371e+06	1243594	1.56348e+06	4.43158e+06	1.74992e+06	2.827e+06	3.73014e+06	2.11515e+06	6.0724e+06	2.02236e+06	3.74874e+06	2.50981e+06	4.37296e+06	1.62548e+06	2.06967e+06	1.92465e+06	2.35803e+06	3.16687e+06	2.94506e+06	2.21592e+06	3.66382e+06	1.78378e+06	2.06836e+06	2.52805e+06	2.03704e+06	2.47529e+06	2.33137e+06
Menthone 8-thioacetate	0.505536	B(iii)			561.266	229.13	forward	4.6333e+06	2.13695e+06	9.89842e+06	1.18172e+07	1.39553e+06	4.22945e+06	1.05341e+06	1.25409e+07	9.66095e+06	5.16638e+06	3.95611e+06	6.83825e+06	1.47157e+06	1.09071e+07	1.57283e+06	2.83033e+06	3.94071e+06	2.85618e+06	1.56553e+06	7.29219e+06	2.70317e+06	6.53982e+06	5.25261e+06	945078	755501	8.4122e+06	1.45702e+06	1.03342e+06	3.03268e+06	960568	3.89556e+06	1.23892e+06	4.00669e+06	4.70751e+06	5.24825e+06	5.57508e+06	5.67108e+06
PG(18:0/18:2(9Z,12Z))	0.505254	B(iii)			53.519	775.56	forward	118022	241764	102206	175861	477255	112456	95126.6	246667	202332	102744	161169	128716	111811	127887	151718	179529	146819	198426	113400	227147	185888	111572	208261	139172	85466.7	379997	117424	115238	108675	474141	76128.2	174485	279734	113142	121597	164021	125951
Chlorogenic acid	0.503768	B(iii)			153.094	393.051	forward	542871	986518	559157	515400	1.24026e+06	1.00103e+06	1.00077e+06	494987	773523	1.07588e+06	1.04847e+06	628227	1.30931e+06	837948	1.04089e+06	753342	745156	940775	493170	1.1725e+06	1.34143e+06	1.04931e+06	940622	889385	1.70618e+06	790763	814891	1.38721e+06	1.21822e+06	1.33063e+06	923523	686197	1.15356e+06	1.31059e+06	1.29341e+06	1.52117e+06	1.58119e+06
Epomusenin A	0.503635	B(iii)			167.446	559.509	forward	1.28623e+06	2.22408e+06	1.47805e+06	1.59247e+06	604649	1.16566e+06	1.00409e+06	1.54762e+06	1.06698e+06	440973	647079	97945	831292	448366	445086	797569	1.28448e+06	1.61142e+06	1.56005e+06	1.25536e+06	1.42321e+06	1.27649e+06	1.00505e+06	1.27331e+06	306838	708901	647285	745582	624395	578962	1.06606e+06	1.19454e+06	803207	1.05872e+06	531945	926950	518800
4-Acetamidobutanoic acid	0.503501	B(iii)			477.252	146.081	forward	1.83064e+07	1.53704e+07	1.84628e+07	1.45706e+07	1.99348e+07	5.62421e+06	1.48822e+07	1.51467e+07	1.50551e+07	1.51111e+07	1.74913e+07	1.51605e+07	1.38924e+07	1.53684e+07	2.01979e+07	1.45366e+07	1.15362e+07	1.49167e+07	1.63397e+07	1.99777e+07	1.51414e+07	1.56399e+07	5.00365e+06	1.39983e+07	1.3507e+07	2.0877e+07	5.35721e+06	1.45993e+07	1.93496e+07	5.66003e+06	1.40933e+07	1.45107e+07	1.55927e+07	1.52878e+07	3.02542e+06	1.51818e+07	1.53589e+07
PI(20:3(5Z,8Z,11Z)/18:2(9Z,12Z))	0.502133	B(iii)			204.958	885.549	forward	1.60272e+06	761479	1.74459e+06	1.86519e+06	2.72423e+06	2.05965e+06	3.75311e+06	1.24856e+06	2.74791e+06	2.32294e+06	2.90847e+06	3.60383e+06	2.86321e+06	1.8003e+06	3.09212e+06	1.31656e+06	1.20639e+06	2.13431e+06	623109	1.23653e+06	1.3787e+06	1.41139e+06	1.12943e+06	927722	6.24135e+06	2.05087e+06	2.99359e+06	2.85635e+06	2.33866e+06	2.36483e+06	2.0975e+06	693459	2.55263e+06	2.58619e+06	2.13692e+06	2.26627e+06	2.53033e+06
Gluconolactone	0.499739	B(iii)			187.325	177.04	forward	3.62758e+07	3.12331e+07	4.0362e+07	3.67823e+07	4.90649e+07	3.57803e+07	3.22811e+07	3.68571e+07	6.93923e+07	3.66657e+07	3.39815e+07	3.64888e+07	4.30343e+07	8.87159e+07	3.53908e+07	4.312e+07	3.70036e+07	3.39154e+07	8.65796e+07	3.58944e+07	3.44928e+07	3.95566e+07	3.53084e+07	4.03797e+07	4.52187e+07	3.9108e+07	3.52398e+07	3.78e+07	3.49834e+07	4.35726e+07	3.46834e+07	3.9274e+07	3.57649e+07	7.8244e+07	3.7495e+07	5.53085e+07	8.18201e+07
Cordeauxione	0.498272	B(iii)			279.584	245.114	forward	154626	184844	244574	329130	272684	249027	408045	129479	92061.7	320962	331936	713403	95918.7	187650	61917.8	220744	272797	241017	180153	439527	431932	210289	270705	304926	941250	342570	261696	255339	458949	307927	114369	279367	373337	352740	259973	282336	295363
Lysyl-Proline	0.493411	B(iii)			560.049	244.166	forward	1.57322e+06	980616	1.21491e+06	1.65751e+06	840002	954040	802555	1.31823e+06	1.08194e+06	909828	648381	1.79955e+06	521727	1.39856e+06	946778	925386	826959	784006	861115	973405	830872	925303	731762	813112	771202	1.06967e+06	933793	717807	922450	809554	945408	836826	684670	1.11541e+06	940217	1.07677e+06	1.08563e+06
Pseudouridine	0.491359	B(iii)			256.662	243.062	forward	2.42637e+07	2.09067e+07	2.31884e+07	2.35074e+07	3.07117e+07	2.79636e+07	2.18881e+07	2.59358e+07	2.02048e+07	1.65788e+07	2.12384e+07	2.58387e+07	1.93441e+07	2.3006e+07	2.5659e+07	2.05874e+07	2.13238e+07	1.96529e+07	1.5266e+07	2.01539e+07	2.56496e+07	2.08628e+07	1.98726e+07	2.07502e+07	1.49931e+07	2.16787e+07	2.19776e+07	2.28781e+07	2.35341e+07	2.19107e+07	2.00019e+07	2.80751e+07	2.24822e+07	2.3397e+07	2.4402e+07	2.32918e+07	2.38992e+07
Glutamylglutamic acid	0.48898	B(iii)			436.24	277.102	forward	667565	770799	727620	593626	695746	809872	583247	759959	720102	681035	626829	546707	683056	697400	798118	669016	819931	600820	906942	662052	762776	760195	765058	834316	734385	727373	737382	671567	707998	662522	779848	623430	641334	769962	761802	633188	776304
Desaminotyrosine	0.485253	B(iii)			5.47767	165.055	forward	3.55488e+06	2.93288e+06	2.72333e+06	2.62233e+06	2.64369e+06	2.41142e+06	2.36269e+06	2.44631e+06	2.69538e+06	2.31136e+06	2.4531e+06	2.65209e+06	1.68438e+06	2.88186e+06	2.46057e+06	2.50474e+06	2.39698e+06	2.56062e+06	2.59365e+06	3.31169e+06	2.40313e+06	2.24738e+06	1.82685e+06	2.46412e+06	2.54311e+06	2.29835e+06	2.64621e+06	2.42018e+06	2.60553e+06	2.67779e+06	2.33352e+06	2.53874e+06	2.913e+06	2.69289e+06	2.45866e+06	2.10764e+06	2.89015e+06
gamma-Glutamylalanine	0.484401	B(iii)			444.941	217.083	forward	4.98335e+06	5.10851e+06	3.72327e+06	5.61715e+06	3.93223e+06	4.16967e+06	4.37295e+06	6.65907e+06	4.6427e+06	7.25156e+06	7.90894e+06	5.43086e+06	4.26984e+06	8.83399e+06	4.24011e+06	4.32093e+06	3.68496e+06	5.96721e+06	4.4063e+06	5.63506e+06	4.37371e+06	7.01819e+06	3.63727e+06	3.23035e+06	5.93394e+06	4.65852e+06	3.01647e+06	6.15984e+06	6.07381e+06	3.03949e+06	4.81117e+06	3.62974e+06	5.57328e+06	5.2781e+06	5.51605e+06	5.4614e+06	5.16047e+06
PC(14:1(9Z)/P-18:1(9Z))	0.484114	B(iii)			167.448	714.543	forward	5.10928e+06	5.79188e+06	2.82244e+06	4.30614e+06	2.59399e+06	3.26735e+06	4.94773e+06	5.02224e+06	3.79571e+06	2.74759e+06	1.45303e+06	2.76623e+06	2.57132e+06	3.1353e+06	2.80424e+06	3.95912e+06	3.24198e+06	3.25977e+06	4.1572e+06	6.11892e+06	4.10943e+06	2.63877e+06	3.02633e+06	2.0716e+06	1.49345e+06	2.59872e+06	2.67724e+06	3.43081e+06	1.97853e+06	2.79593e+06	3.68583e+06	2.20474e+06	2.62398e+06	3.15568e+06	3.05452e+06	2.41082e+06	3.32651e+06
cis-Murisolinone	0.482149	B(iii)			163.961	581.493	forward	0	329054	86897.6	0	2.83406e+06	89766.4	5.8388e+06	252309	4.20389e+06	4.38145e+06	4.31638e+06	3.78657e+06	4.22561e+06	4.42385e+06	4.79437e+06	1.68253e+06	107645	182390	144770	88364	184191	223510	0	87210.8	3.87203e+06	4.71577e+06	3.02492e+06	4.49159e+06	3.6921e+06	3.68174e+06	4.87669e+06	0	2.42213e+06	2.2066e+06	2.46805e+06	2.40317e+06	2.12063e+06
Cyclamic acid	0.481348	B(iii)			59.4858	178.05	forward	2.21126e+06	3.94088e+06	4.12331e+06	1.57749e+06	2.22054e+06	494916	1.19369e+06	3.55738e+06	2.90296e+06	1.79255e+06	2.10914e+06	763420	3.17901e+06	523375	4.47504e+06	1.35284e+06	2.40409e+06	2.7106e+06	1.75125e+06	1.48811e+06	3.03038e+06	3.11197e+06	2.18427e+06	3.06857e+06	6.44248e+06	428348	2.31413e+06	3.10867e+06	1.20861e+06	1.57531e+06	1.21497e+06	1.2363e+06	3.70283e+06	3.87807e+06	2.37801e+06	3.64677e+06	4.16482e+06
Muricatenol	0.481165	B(iii)			124.927	609.525	forward	2.89341e+06	2.15125e+06	3.69595e+06	1.57951e+06	2.56268e+06	3.59196e+06	1.32662e+06	2.37219e+06	5.17489e+06	2.55589e+06	5.08571e+06	3.76411e+06	3.52351e+06	2.96378e+06	1.66925e+06	2.05841e+06	1.45853e+06	2.07956e+06	4.4043e+06	1.34469e+06	1.19371e+06	2.46161e+06	2.63505e+06	2.56157e+06	1.09626e+06	4.78339e+06	2.28672e+06	4.64752e+06	3.07901e+06	1.83395e+06	1.88768e+06	3.69751e+06	1.23221e+06	1.96101e+06	3.29547e+06	1.69933e+06	2.06753e+06
Aldehydo-D-xylose	0.479847	B(iii)			304.689	149.046	forward	531179	540181	519973	739833	680715	2.02379e+06	657257	569711	429516	684843	464190	599442	566520	593997	465246	517979	422932	601135	505887	426852	446410	465485	415215	479563	2.54408e+06	571606	419018	621315	843471	428850	255073	419395	564711	929161	771355	537836	655860
Piplartine	0.479069	B(iii)			457.155	318.141	forward	292632	382216	442577	258956	422086	303521	343442	422132	309309	279705	244677	230358	324320	246085	417015	406308	399228	368410	410684	256946	290800	309030	272124	384945	273219	398083	346664	369223	319137	270408	477347	363348	224859	367468	344082	414294	315563
3,5-Dichloro-4-hydroxy-2-methoxy-6-methylbenzoic acid	0.4786	B(iii)			25.5264	250.988	forward	4.32042e+06	2.42172e+06	1.72023e+06	2.79377e+06	2.79077e+06	5.07096e+06	2.43967e+06	2.77667e+06	2.37208e+06	3.33489e+06	2.7587e+06	2.98182e+06	4.75754e+06	3.02591e+06	1.37789e+06	1.23055e+06	2.81977e+06	3.0482e+06	2.81151e+06	2.71109e+06	3.03332e+06	2.79566e+06	2.18478e+06	3.12647e+06	1.33342e+06	2.78782e+06	2.47613e+06	2.51598e+06	2.7606e+06	2.75392e+06	2.91217e+06	4.38556e+06	1.96806e+06	3.61159e+06	2.36425e+06	2.23049e+06	2.02707e+06
PC(P-16:0/18:4(6Z,9Z,12Z,15Z))	0.476747	B(iii)			127.448	738.545	forward	1.19625e+07	1.2296e+07	1.05278e+07	5.10137e+06	5.62178e+06	4.13837e+06	5.223e+06	4.28451e+06	5.36035e+06	3.24526e+06	5.48163e+06	5.02751e+06	6.03531e+06	3.75545e+06	5.39377e+06	6.27314e+06	2.93489e+06	2.974e+06	5.28776e+06	4.32167e+06	8.58073e+06	5.42816e+06	3.95818e+06	3.68422e+06	3.7726e+06	5.43964e+06	5.65503e+06	4.46564e+06	1.09452e+07	6.10976e+06	5.01574e+06	3.54867e+06	4.67195e+06	5.02096e+06	4.95365e+06	4.68954e+06	4.80851e+06
N-Acetylaspartylglutamic acid	0.47537	B(iii)			189.209	303.07	forward	968763	1.39231e+06	309211	431589	314050	274242	327414	354086	1.21071e+06	491545	320528	992163	470028	217011	469443	495292	216820	251271	1.07609e+06	290664	273955	618641	260994	466511	1.25803e+06	227847	250116	280762	252408	541587	231615	512620	388335	390058	331311	291973	298938
5'-Hydroxymethyl meloxicam	0.475154	B(iii)			470.648	368.037	forward	1.94647e+06	1.52751e+06	2.22647e+06	1.60066e+06	1.32129e+06	2.46971e+06	2.68034e+06	1.11193e+06	1.71052e+06	2.50471e+06	1.80625e+06	3.11143e+06	2.51062e+06	2.14775e+06	808848	1.45197e+06	2.8145e+06	2.09827e+06	1.74893e+06	2.84688e+06	1.48668e+06	3.10561e+06	2.09971e+06	2.66385e+06	2.10434e+06	2.45948e+06	1.84412e+06	2.29655e+06	1.42227e+06	1.80667e+06	2.69109e+06	2.6863e+06	1.61695e+06	1.79889e+06	1.3061e+06	1.49066e+06	2.21782e+06
Squamocin L	0.47183	B(iii)			160.981	607.509	forward	1.80174e+06	1.65556e+06	1.51489e+06	1.66717e+06	3.62202e+06	1.78345e+06	4.77676e+06	1.87905e+06	3.4799e+06	4.18355e+06	4.60232e+06	3.8658e+06	3.98941e+06	4.85338e+06	5.24034e+06	3.14911e+06	2.55065e+06	2.23502e+06	1.99813e+06	1.89657e+06	1.99563e+06	1.97117e+06	2.21024e+06	2.24632e+06	4.44901e+06	4.25794e+06	4.31932e+06	4.22527e+06	4.14081e+06	4.06688e+06	4.88809e+06	1.62447e+06	3.45125e+06	2.98068e+06	3.24888e+06	3.77651e+06	3.40326e+06
p-Hydroxymandelic acid	0.470253	B(iii)			150.385	167.038	forward	2.4842e+06	2.32639e+06	2.67133e+06	2.46153e+06	2.20964e+06	2.03848e+06	1.90467e+06	2.11794e+06	2.35707e+06	2.20347e+06	2.01699e+06	2.2163e+06	2.29375e+06	2.59186e+06	2.06471e+06	2.3479e+06	2.21738e+06	2.32009e+06	2.39885e+06	2.25366e+06	2.26761e+06	2.25297e+06	2.58371e+06	2.54546e+06	2.54642e+06	2.24035e+06	2.38691e+06	2.28508e+06	2.23514e+06	2.12362e+06	2.38314e+06	2.29567e+06	1.9661e+06	2.22211e+06	3.04245e+06	2.26633e+06	2.78816e+06
beta-D-3-[5-Deoxy-5-(dimethylarsinyl)ribofuranosyloxy]-2-hydroxy-1-propanesulfonic acid	0.465472	B(iii)			455.728	393.019	forward	290991	340172	227231	244846	353967	506741	371395	222018	274214	477015	402232	405403	523003	446223	264519	231622	399572	287938	413198	661242	498362	358492	215427	785773	581062	443972	409137	494244	409225	422124	421899	408275	304156	413521	500446	449479	362112
3-Hydroxychavicol 1-glucoside	0.465364	B(iii)			231.873	313.126	forward	335718	443024	521195	624483	455206	429902	814579	472444	415100	479057	487357	528354	420825	605508	395393	449841	464230	591114	425980	560871	548078	515009	431019	672776	553125	581820	396985	625882	582583	454173	340584	444531	521739	519181	591201	633894	505383
Stearoylcarnitine	0.465311	B(iii)			197.001	428.373	forward	4.35401e+07	5.74545e+07	6.53608e+07	1.05352e+08	1.50288e+08	1.98067e+08	3.14747e+08	3.85829e+08	9.27118e+07	8.83662e+07	6.51506e+07	3.4715e+07	1.08704e+08	2.56494e+08	4.20911e+08	1.51256e+08	2.64314e+07	1.05368e+07	1.14902e+08	5.43133e+07	1.39955e+08	1.44796e+08	1.51673e+08	1.01708e+08	5.68465e+07	7.08063e+07	6.0836e+07	4.40855e+07	5.5295e+07	4.1795e+07	1.10862e+08	1.41725e+08	1.30445e+08	1.40311e+08	1.33917e+08	1.4382e+08	1.39428e+08
N-Acetyl-a-neuraminic acid	0.465188	B(iii)			88.0067	308.1	forward	739530	968693	153739	1.06929e+06	0	0	1.11205e+06	316201	130378	0	575864	438490	694491	584537	0	557229	123737	0	385664	383316	1.02545e+06	726775	822201	659180	471489	284360	108364	652400	644124	588766	279691	428557	429310	153041	461267	139148	577231
LysoPE(20:4(8Z,11Z,14Z,17Z)/0:0)	0.464	B(iii)			214.268	502.294	forward	2.54812e+06	2.75044e+06	2.24914e+06	2.05902e+06	2.09121e+06	2.80815e+06	1.91127e+06	2.03686e+06	1.38372e+06	1.77084e+06	1.3671e+06	1.47062e+06	1.46774e+06	1.64286e+06	1.43854e+06	2.20278e+06	2.14399e+06	2.3906e+06	2.94494e+06	2.75892e+06	2.74445e+06	2.87919e+06	2.12966e+06	2.66074e+06	4.04947e+06	1.59089e+06	1.97067e+06	1.43412e+06	1.31962e+06	1.51223e+06	1.07633e+06	2.73743e+06	3.09553e+06	3.19181e+06	3.14085e+06	3.42752e+06	3.45713e+06
3-Hydroxymethylglutaric acid	0.463968	B(iii)			525.477	161.045	forward	2.38137e+06	2.64031e+06	2.15054e+06	2.25994e+06	3.08384e+06	2.65823e+06	4.26213e+06	3.0269e+06	2.81941e+06	2.3377e+06	2.35219e+06	2.39772e+06	3.19542e+06	2.28493e+06	3.03205e+06	2.57738e+06	2.27273e+06	3.13274e+06	2.7257e+06	3.02487e+06	2.15976e+06	2.67198e+06	2.43983e+06	2.35945e+06	2.69452e+06	2.52076e+06	2.33847e+06	2.74207e+06	3.37592e+06	2.53581e+06	3.13472e+06	2.44299e+06	2.55312e+06	2.03328e+06	2.03511e+06	2.89621e+06	2.23628e+06
PC(18:4(6Z,9Z,12Z,15Z)/P-16:0)	0.463586	B(iii)			162.028	738.545	forward	2.01602e+07	1.86191e+07	1.43466e+07	1.2396e+07	1.53461e+07	1.97345e+07	1.21803e+07	1.76435e+07	1.22031e+07	1.31561e+07	1.2438e+07	1.31173e+07	1.46944e+07	9.65846e+06	1.43827e+07	1.40143e+07	1.53275e+07	1.37081e+07	1.37183e+07	2.56127e+07	1.31326e+07	1.51798e+07	1.14481e+07	1.28614e+07	9.88111e+06	1.10351e+07	1.09503e+07	1.02652e+07	1.26513e+07	1.20582e+07	1.21444e+07	1.15221e+07	1.18952e+07	1.31105e+07	1.21733e+07	1.19634e+07	1.24627e+07
Quinic acid	0.463069	B(iii)			204.971	191.057	forward	4.99688e+06	5.04355e+06	6.27327e+06	5.09523e+06	4.91253e+06	4.70881e+06	4.54585e+06	5.37806e+06	4.64606e+06	5.01301e+06	3.23454e+06	3.48574e+06	4.04013e+06	4.73137e+06	5.95322e+06	4.76796e+06	5.32834e+06	5.4299e+06	5.90344e+06	4.15356e+06	4.72011e+06	6.68042e+06	5.5588e+06	5.24721e+06	2.26348e+06	5.69034e+06	5.46941e+06	3.78304e+06	4.48908e+06	4.77148e+06	5.3035e+06	5.06095e+06	5.07454e+06	4.60924e+06	5.71471e+06	4.80647e+06	4.58594e+06
Diaminopimelic acid	0.461829	B(iii)			411.858	189.087	forward	3.84564e+06	5.00837e+06	5.27832e+06	6.96249e+06	4.75981e+06	3.10688e+06	4.69348e+06	5.21003e+06	4.56791e+06	5.86629e+06	5.58051e+06	4.89706e+06	4.71786e+06	8.86762e+06	4.80151e+06	6.03704e+06	3.97565e+06	6.34346e+06	5.67828e+06	4.84423e+06	5.07248e+06	4.79935e+06	3.49497e+06	5.14076e+06	5.17698e+06	3.23374e+06	6.63193e+06	5.17466e+06	4.31645e+06	7.60213e+06	4.99229e+06	3.66414e+06	5.7527e+06	5.80096e+06	5.7181e+06	5.43088e+06	5.50692e+06
PC(16:1(9Z)/P-18:1(11Z))	0.460738	B(iii)			137.307	742.575	forward	2.69809e+08	2.19075e+08	2.4477e+08	2.74958e+08	1.62849e+08	8.61829e+07	5.80175e+08	2.96019e+08	3.03817e+08	3.08213e+08	1.44442e+08	1.93673e+08	2.17346e+08	3.41708e+08	2.5201e+08	1.79046e+08	2.54319e+08	3.11799e+08	3.29906e+08	1.56637e+08	2.67633e+08	3.28817e+08	2.60294e+08	1.94276e+08	8.12502e+07	1.85197e+08	2.18323e+08	3.0901e+08	1.45124e+08	1.15976e+08	2.16471e+08	1.91747e+08	1.86564e+08	2.92965e+08	1.00795e+08	1.0104e+08	2.75698e+08
6'-Hydroxyangolensin	0.46056	B(iii)			355.456	289.114	forward	278323	135282	342267	260467	198655	335481	584391	309933	309711	315091	281230	250324	182130	440346	285876	289463	429946	216775	320858	299441	317379	410685	207397	270572	223771	334412	162000	171740	230045	218391	418942	370217	292331	321097	228889	274584	367183
SM(d18:1/24:1(15Z))	0.458808	B(iii)			199.212	813.686	forward	4.33813e+07	3.84566e+07	4.22415e+07	3.92333e+07	5.08464e+07	4.04442e+07	3.56949e+07	5.00734e+07	3.74669e+07	4.77208e+07	5.16446e+07	5.29588e+07	4.99012e+07	4.65559e+07	4.20917e+07	4.60867e+07	4.54633e+07	4.7024e+07	4.72876e+07	4.56465e+07	4.98907e+07	4.77193e+07	3.4513e+07	4.79842e+07	1.5413e+08	5.68409e+07	5.91048e+07	6.03026e+07	5.36585e+07	5.72103e+07	5.78426e+07	5.96925e+07	4.25629e+07	3.93215e+07	3.63735e+07	3.5429e+07	3.53479e+07
PE(22:5(7Z,10Z,13Z,16Z,19Z)/P-16:0)	0.458727	B(iii)			160.902	750.543	forward	2.81902e+08	2.69392e+08	2.61496e+08	2.7172e+08	2.66835e+08	3.07926e+08	2.62876e+08	3.20622e+08	2.61971e+08	2.62997e+08	2.7894e+08	2.67489e+08	2.78014e+08	2.61817e+08	3.17579e+08	2.56167e+08	2.86507e+08	2.75059e+08	2.99454e+08	2.87333e+08	2.86322e+08	2.96923e+08	3.12523e+08	2.92598e+08	2.78124e+08	2.77334e+08	2.62802e+08	2.77307e+08	2.64685e+08	2.5616e+08	3.07939e+08	2.57678e+08	2.66064e+08	2.70126e+08	2.61124e+08	2.53535e+08	2.80077e+08
Glucosamine-1P	0.458653	B(iii)			480.232	260.053	forward	1.02803e+07	1.02323e+07	9.50276e+06	7.30319e+06	8.51524e+06	6.55158e+06	5.39957e+06	1.31737e+07	9.09045e+06	5.3657e+06	9.06152e+06	8.06866e+06	7.65804e+06	1.0881e+07	1.13971e+07	1.42965e+07	6.85581e+06	1.22963e+07	5.60611e+06	8.40649e+06	6.54685e+06	5.04505e+06	7.1909e+06	3.83814e+06	2.33912e+06	6.77252e+06	7.45497e+06	5.80904e+06	5.54712e+06	6.57191e+06	4.64073e+06	6.4768e+06	7.59277e+06	8.42386e+06	7.61185e+06	9.29543e+06	8.68133e+06
3-(4-Isopropylphenyl)propanal	0.458484	B(iii)			540.792	177.123	forward	5.3767e+06	2.2447e+07	1.16014e+07	2.50969e+07	1.06243e+07	2.17233e+07	2.25445e+07	1.78581e+07	6.17187e+07	1.94302e+07	1.67163e+07	3.77319e+07	1.25341e+07	4.92525e+07	2.09778e+07	1.44347e+07	3.28676e+07	1.64241e+07	2.56715e+07	5.28106e+07	2.54622e+07	2.13531e+07	1.45973e+07	1.52712e+07	7.04259e+06	6.01632e+06	1.33318e+07	2.56063e+07	1.39652e+07	1.58491e+07	2.39911e+07	2.01435e+07	1.98655e+07	1.29633e+07	2.36714e+07	3.93662e+07	9.22032e+07
Achimilic acid	0.458095	B(iii)			563.376	279.118	forward	697393	1.83349e+06	1.14726e+06	865236	1.51826e+06	1.33634e+06	1.33525e+06	1.00492e+06	1.06268e+06	1.0732e+06	1.08932e+06	546693	1.33579e+06	790805	1.48789e+06	1.19894e+06	1.34971e+06	1.33683e+06	1.92049e+06	1.15712e+06	1.63177e+06	1.14118e+06	1.35857e+06	1.80114e+06	1.68115e+06	1.15303e+06	1.45887e+06	1.37681e+06	1.32571e+06	1.51501e+06	1.31025e+06	1.59768e+06	1.14836e+06	1.08231e+06	1.31204e+06	1.23041e+06	1.13545e+06
Ecgonine methyl ester	0.456551	B(iii)			341.64	200.128	forward	1.09039e+06	1.36106e+06	1.12499e+06	1.35969e+06	1.35937e+06	1.21588e+06	1.61305e+06	1.3243e+06	1.2531e+06	1.55612e+06	1.03003e+06	937209	1.42363e+06	1.90519e+06	1.8086e+06	1.33642e+06	1.0047e+06	976431	2.35707e+06	1.22501e+06	1.18941e+06	1.70215e+06	2.23711e+06	1.333e+06	1.52133e+06	1.89943e+06	1.48785e+06	1.86696e+06	1.68719e+06	1.77291e+06	1.64564e+06	2.00451e+06	1.3056e+06	1.42273e+06	1.50388e+06	1.47367e+06	1.67345e+06
BL V	0.455314	B(iii)			250.373	425.085	forward	0	276976	380525	25449	0	739601	20180.6	44293.9	123637	0	31535.5	16800.4	177027	0	0	13700.6	1.73647e+06	12329.8	79885.4	335836	16526.1	222637	442561	0	1.0466e+07	0	467240	0	1.46784e+06	1.46138e+06	398693	0	367556	570295	400536	388298	331663
Ginkgolide C	0.452959	B(iii)			82.3886	439.125	forward	645014	6.31536e+06	4.98671e+06	893139	748514	1.1258e+07	655659	1.02133e+06	1.0822e+06	30537.8	353752	452303	1.97758e+06	89259.6	257134	280626	2.8017e+07	147344	1.75583e+06	5.4231e+06	231569	2.88709e+06	8.10208e+06	0	4.23609e+07	316668	9.40119e+06	0	2.59282e+07	1.80007e+07	1.28505e+07	17492	5.29989e+06	4.19953e+06	2.59422e+06	6.35834e+06	5.74375e+06
PS(18:1(9Z)/20:4(5Z,8Z,11Z,14Z))	0.452417	B(iii)			223.272	810.525	forward	959950	940507	1.00499e+06	690889	674281	774196	530077	1.07351e+06	464740	906620	871140	760398	591013	963718	869146	660714	865020	722540	840842	811164	825635	415201	708572	725704	845716	639831	563829	528541	548973	585923	684766	1.18848e+06	853936	692346	708839	510095	645811
Nephritogenoside	0.452198	B(iii)			276.763	505.175	forward	112730	181329	204308	56259.2	175216	76301.6	200817	72718.7	82355.2	127003	40537.1	276575	86016.5	92056.6	107043	85010.9	57919.3	70688.5	95135.5	106591	23365.6	75294.1	56813.2	38023.4	92018.8	122507	207571	70171.8	160775	130573	122615	266096	182282	175347	143363	146216	99084
L-Hexanoylcarnitine	0.451358	B(iii)			248.08	260.186	forward	3.01394e+07	2.38397e+07	6.54649e+07	6.68411e+07	6.66703e+07	4.90326e+07	8.36182e+07	1.09519e+08	4.08479e+07	3.43586e+07	4.21276e+07	1.91338e+07	3.82154e+07	8.87715e+07	1.11769e+08	8.11615e+07	1.90145e+07	6.62904e+07	5.4483e+07	3.6366e+07	6.42929e+07	6.34485e+07	6.30618e+07	7.76988e+07	8.28805e+07	4.13149e+07	2.13254e+07	1.04121e+08	8.0048e+07	4.18505e+07	4.42536e+07	5.82621e+07	6.17015e+07	6.099e+07	5.81611e+07	6.33194e+07	6.00773e+07
Deoxyadenosine	0.449188	B(iii)			308.616	250.095	forward	1.05265e+06	1.12055e+06	1.6613e+06	753546	1.08401e+06	725766	779654	1.23053e+06	839547	1.15089e+06	858032	726025	706500	1.19496e+06	1.20607e+06	851464	1.00874e+06	904531	1.22272e+06	742179	1.09161e+06	1.27207e+06	1.3879e+06	1.1331e+06	874385	1.26805e+06	913456	826486	924604	1.34953e+06	941977	1.24736e+06	1.40377e+06	1.19011e+06	966278	1.01034e+06	994261
Threoninyl-Gamma-glutamate	0.448162	B(iii)			236.156	248.128	forward	1.19699e+06	1.25852e+06	1.44598e+06	1.60661e+06	1.11749e+06	891728	1.37479e+06	966691	1.7678e+06	1.81226e+06	1.57774e+06	1.75092e+06	1.41885e+06	1.69909e+06	2.1972e+06	1.21463e+06	1.00668e+06	872808	1.63967e+06	1.16424e+06	1.57968e+06	1.38726e+06	1.73348e+06	1.48929e+06	923237	1.39805e+06	1.05774e+06	1.07971e+06	1.33435e+06	1.0971e+06	1.03484e+06	1.64294e+06	1.11977e+06	1.35353e+06	1.29024e+06	1.255e+06	1.49328e+06
LysoPE(0:0/22:4(7Z,10Z,13Z,16Z))	0.447093	B(iii)			211.942	530.325	forward	346885	343721	242554	189998	105733	300933	52094.6	242698	25551.7	88441.2	86308.1	24649	89107.2	42949	29283.7	103757	262111	352257	277973	405527	297994	341985	274639	325345	173065	32336	124337	65694.7	71902.1	70546.7	56254.9	262709	306026	247918	370134	398343	298067
PC(P-18:1(9Z)/14:1(9Z))	0.44648	B(iii)			141.92	714.543	forward	4.41126e+06	2.02914e+06	3.52825e+06	1.6781e+06	1.30903e+06	865467	3.89246e+06	2.03355e+06	2.19727e+06	2.1943e+06	1.45323e+06	1.92241e+06	1.92114e+06	2.80038e+06	3.06787e+06	3.11909e+06	1.64546e+06	1.64629e+06	3.9493e+06	4.60748e+06	4.91679e+06	1.63843e+06	1.84997e+06	1.54812e+06	455118	1.91838e+06	1.52958e+06	2.21936e+06	637716	2.37135e+06	3.19771e+06	1.53824e+06	2.7926e+06	1.78848e+06	2.19995e+06	1.11893e+06	1.59087e+06
1,2,3,4,5,6-Hexahydro-5-methyl-7H-cyclopenta[b]pyridin-7-one	0.446247	B(iii)			220.906	152.107	forward	631803	984278	884266	864333	710320	963049	629840	1.01889e+06	806107	797236	748641	1.00005e+06	1.02885e+06	870956	929294	837109	918357	892183	872767	1.1021e+06	910369	844126	1.11291e+06	813179	769650	982925	862784	1.27556e+06	842341	1.0899e+06	1.14238e+06	1.02638e+06	769041	1.24582e+06	1.20572e+06	1.03175e+06	1.23074e+06
Diadenosine diphosphate	0.446106	B(iii)			219.723	677.127	forward	0	255154	143463	0	0	397128	13126.9	21601.2	43382	0	0	17236.7	72094.3	0	0	0	658998	0	75946.6	248063	0	42090.8	292350	0	1.04276e+06	0	225509	0	937248	606779	363061	0	164641	224948	213781	183158	155548
Dethiobiotin	0.446091	B(iii)			321.613	213.124	forward	939351	775766	966905	928986	915804	1.06467e+06	1.49565e+06	800209	1.21998e+06	1.16832e+06	912590	1.01316e+06	1.01197e+06	1.33887e+06	1.1139e+06	785756	850393	1.20527e+06	1.18433e+06	937230	1.21147e+06	1.08283e+06	1.01381e+06	745814	665078	1.21509e+06	1.01269e+06	894117	1.10484e+06	1.08112e+06	1.16492e+06	1.06752e+06	1.00392e+06	721829	1.10124e+06	970268	1.08896e+06
Suberic acid	0.443671	B(iii)			328.404	173.081	forward	5.97923e+06	7.28038e+06	5.81037e+06	5.78746e+06	6.54114e+06	5.66981e+06	8.30338e+06	6.30958e+06	5.69758e+06	5.52602e+06	5.36293e+06	7.63496e+06	5.12325e+06	7.01672e+06	5.98648e+06	7.09668e+06	8.33919e+06	6.94278e+06	1.14112e+07	6.42448e+06	8.28386e+06	5.45354e+06	6.3859e+06	8.517e+06	6.44807e+06	5.8379e+06	7.44459e+06	1.1103e+07	5.98746e+06	7.69141e+06	5.82556e+06	7.4513e+06	5.26282e+06	5.93816e+06	6.46702e+06	6.58805e+06	7.42145e+06
1-(2,4,6-Trimethoxyphenyl)-1,3-butanedione	0.439354	B(iii)			355.471	253.104	forward	1.54663e+06	2.10157e+06	2.89072e+06	1.19435e+06	1.94987e+06	2.72215e+06	1.75849e+06	2.33061e+06	1.82477e+06	1.62416e+06	1.10289e+06	1.05307e+06	1.25707e+06	1.61104e+06	2.52327e+06	1.37697e+06	2.83332e+06	902846	2.53865e+06	1.75504e+06	1.64246e+06	1.92981e+06	2.56361e+06	1.86077e+06	2.45877e+06	2.18652e+06	1.15205e+06	1.48405e+06	1.51452e+06	1.4804e+06	2.13211e+06	2.06294e+06	2.02421e+06	2.06078e+06	2.19607e+06	1.66159e+06	1.62962e+06
2-O-p-Coumaroylhydroxycitric acid	0.438207	B(iii)			29.4933	355.07	forward	1.87364e+06	1.24194e+06	1.40573e+06	1.19856e+06	1.63051e+06	1.61546e+06	2.68319e+06	865660	1.43357e+06	157475	1.10127e+06	1.04319e+06	2.02988e+06	2.24188e+06	2.42118e+06	911029	469939	210967	1.38895e+06	1.3736e+06	1.37702e+06	161521	4.6034e+06	2.43787e+06	310313	2.92231e+06	1.27558e+06	1.96612e+06	835261	1.48654e+06	678246	944996	1.48438e+08	1.60748e+08	1.51305e+08	1.64156e+08	1.70916e+08
3-O-Acetylepisamarcandin	0.436817	B(iii)			34.4913	460.27	forward	2.76213e+06	3.53437e+06	3.22581e+06	2.78487e+06	2.85972e+06	3.09375e+06	2.87806e+06	2.72217e+06	2.34128e+06	8.14005e+06	4.07554e+06	8.50556e+06	4.42034e+06	3.36651e+06	120118	1.85668e+06	7.16544e+06	3.23897e+06	4.03906e+06	8.54672e+06	1.27505e+07	7.60928e+06	3.74279e+06	3.84644e+06	7.81313e+06	3.34022e+06	2.46321e+06	2.26758e+06	2.34856e+06	3.88098e+06	2.81106e+06	9.63498e+06	3.63974e+07	6.54711e+06	5.13117e+06	4.62038e+06	3.75528e+06
2-(1-Propenyl)-delta1-piperideine	0.436221	B(iii)			35.0618	124.112		2.13592e+06	1.44575e+06	1.44352e+06	2.4428e+06	1.74918e+06	1.78671e+06	1.39508e+06	1.06301e+06	1.20859e+06	1.79412e+06	2.14371e+06	1.96782e+06	1.588e+06	1.92962e+06	1.87132e+06	1.77534e+06	2.48876e+06	2.01864e+06	1.74583e+06	1.54782e+06	1.78157e+06	1.66195e+06	1.12096e+06	1.66999e+06	1.11481e+06	2.22057e+06	1.40795e+06	1.86314e+06	1.44356e+06	1.45697e+06	1.9024e+06	1.88466e+06	1.25727e+06	1.41761e+06	2.15233e+06	1.67027e+06	1.3769e+06
3-beta-Glucosylcellotriose	0.43401	B(iii)			510.333	667.23	forward	75624.1	78613.9	93894.3	173657	57128.5	114695	55009.7	137008	64842.2	200148	195351	152675	200821	103541	224698	326096	24823	109364	190115	95862.8	110903	227326	169876	203285	62726.2	104720	94623	336381	97580.9	191027	0	71206.4	154082	152885	188464	166499	174058
Cyanidin 3-glucoside	0.431757	B(iii)			190.215	450.124	forward	269250	149688	332016	302716	307490	435463	73679.4	342361	315842	332232	477092	300550	602569	85916.5	501976	695231	147748	328806	1.06558e+06	299605	281381	801506	576419	573196	973190	389791	284889	615217	228472	628443	185924	612889	343357	348333	294749	342273	253813
Spinacine	0.430507	B(iii)			285.831	168.077	forward	1.43863e+06	2.16555e+06	1.88688e+06	1.99935e+06	2.29194e+06	1.5934e+06	2.97864e+06	1.75565e+06	4.2303e+06	2.09529e+06	1.68501e+06	2.62154e+06	1.76291e+06	2.23996e+06	1.84325e+06	2.70467e+06	2.3355e+06	2.44436e+06	2.35959e+06	3.99955e+06	4.58757e+06	1.77446e+06	2.83966e+06	2.93413e+06	2.07779e+06	2.91399e+06	3.28533e+06	3.22632e+06	3.43935e+06	2.83495e+06	2.1591e+06	1.72177e+06	2.00353e+06	2.65938e+06	2.12843e+06	2.1298e+06	2.60322e+06
(2E,11Z)-5-[5-(Methylthio)-4-penten-2-ynyl]-2-furanacrolein	0.430388	B(iii)			228.846	233.067	forward	3.36698e+06	1.8856e+06	1.47778e+06	2.75778e+06	1.64338e+06	1.1054e+06	992708	1.37253e+06	1.18411e+06	2.95809e+06	2.09993e+06	1.31805e+06	1.86548e+06	2.58048e+06	3.47643e+06	781443	3.24104e+06	963100	2.73325e+06	2.51149e+06	1.99176e+06	1.17098e+06	2.60587e+06	1.01553e+06	743702	3.17617e+06	1.09198e+06	1.55331e+06	2.08442e+06	955410	3.39732e+06	1.70985e+06	1.80193e+06	1.17784e+06	2.71242e+06	1.28083e+06	560612
1,3,7-Trimethyluric acid	0.428898	B(iii)			356.642	211.083	forward	3.05171e+06	5.20137e+06	6.30573e+06	3.94549e+06	5.23856e+06	5.24533e+06	4.87377e+06	6.16983e+06	4.58466e+06	3.53679e+06	3.01451e+06	2.91095e+06	4.12905e+06	4.45632e+06	8.01934e+06	3.79371e+06	5.36764e+06	2.92289e+06	7.18939e+06	3.69538e+06	4.46526e+06	4.28914e+06	5.12029e+06	4.73326e+06	4.99583e+06	4.60564e+06	2.89119e+06	3.79829e+06	3.9725e+06	3.12105e+06	5.24245e+06	3.86653e+06	3.73724e+06	4.73305e+06	3.90947e+06	4.63978e+06	4.1841e+06
Isowillardiine	0.428476	B(iii)			389.659	200.069	forward	4.7015e+07	6.48374e+07	5.78537e+07	4.42752e+07	3.5628e+07	6.28117e+07	6.66163e+07	6.48006e+07	4.54601e+07	7.67612e+07	6.52681e+07	7.65208e+07	4.29739e+07	5.08528e+07	1.01643e+08	5.93049e+07	5.80124e+07	5.11405e+07	6.65902e+07	5.85593e+07	5.77375e+07	5.81552e+07	7.07656e+07	5.99098e+07	3.68292e+07	6.67625e+07	7.05682e+07	4.23023e+07	5.15176e+07	7.16983e+07	6.56911e+07	7.80626e+07	7.26353e+07	6.99785e+07	6.67635e+07	5.84345e+07	5.96087e+07
PE(16:0/18:2(9Z,12Z))	0.427846	B(iii)			152.476	714.51	forward	2.07024e+07	1.78044e+07	2.09546e+07	2.50291e+07	1.46844e+07	2.19424e+07	1.39164e+07	1.81248e+07	1.26533e+07	1.08186e+07	1.24045e+07	1.73116e+07	1.34839e+07	8.82543e+06	1.27015e+07	1.53025e+07	1.67412e+07	2.08376e+07	1.504e+07	1.16164e+07	1.64565e+07	8.0482e+06	1.40717e+07	1.9103e+07	1.22598e+07	1.32075e+07	1.50402e+07	1.40192e+07	1.27694e+07	1.0295e+07	1.44951e+07	1.51684e+07	1.23843e+07	1.19061e+07	1.07601e+07	1.07196e+07	1.35862e+07
Squamolone	0.427156	B(iii)			177.527	129.066	forward	4.36342e+06	4.45009e+06	5.93181e+06	3.99626e+06	5.36876e+06	5.61313e+06	3.97298e+06	4.61582e+06	4.9105e+06	4.71379e+06	4.14658e+06	4.54055e+06	5.55078e+06	4.92033e+06	4.7108e+06	5.30448e+06	5.91623e+06	4.3497e+06	6.6062e+06	5.51973e+06	5.73626e+06	5.35112e+06	5.32032e+06	6.31987e+06	6.34886e+06	5.29569e+06	5.26261e+06	5.20196e+06	4.72985e+06	5.58896e+06	4.67942e+06	4.48665e+06	4.843e+06	4.0148e+06	5.60099e+06	4.68783e+06	4.56746e+06
Demethylated antipyrine	0.426255	B(iii)			50.0561	175.087	forward	8.50773e+06	9.00137e+06	8.83301e+06	1.28554e+07	1.62138e+07	1.68687e+07	3.05269e+07	2.13894e+07	1.51127e+07	1.00346e+07	1.23877e+07	6.91333e+06	9.76702e+06	1.8049e+07	1.62544e+07	1.46221e+07	8.41262e+06	1.09738e+07	1.13791e+07	9.68471e+06	1.1906e+07	1.81355e+07	1.83943e+07	1.09394e+07	5.37692e+06	1.12116e+07	1.44947e+07	1.31326e+07	8.83521e+06	7.01403e+06	2.00657e+07	2.15886e+07	1.48331e+07	1.2218e+07	1.27577e+07	1.82662e+07	1.87229e+07
2-(1-Naphthyl)acetamide	0.425043	B(iii)			357.794	186.088	forward	4.07588e+07	5.27808e+07	6.92871e+07	3.86269e+07	5.85592e+07	5.68259e+07	5.06295e+07	6.59965e+07	5.01964e+07	4.19959e+07	3.34762e+07	3.25951e+07	4.15669e+07	4.58562e+07	7.22714e+07	4.40421e+07	6.14766e+07	3.79317e+07	7.50851e+07	4.21902e+07	4.75675e+07	4.81251e+07	5.40466e+07	5.409e+07	4.86284e+07	5.52939e+07	3.67586e+07	3.99258e+07	4.21895e+07	3.74679e+07	5.6312e+07	5.62003e+07	4.31249e+07	4.89308e+07	4.52414e+07	4.31072e+07	4.58495e+07
Oxoadipic acid	0.4229	B(iii)			357.204	159.029	forward	2.68363e+06	3.29946e+06	4.55137e+06	4.69295e+06	4.31769e+06	7.64488e+06	8.85483e+06	7.31695e+06	9.18931e+06	5.37983e+06	4.96065e+06	1.05707e+07	1.23945e+07	1.16151e+07	5.59422e+06	1.28297e+06	2.2556e+06	1.18362e+06	2.74106e+06	7.33891e+06	2.45396e+06	5.62233e+06	8.72239e+06	2.87086e+06	4.34226e+06	7.36154e+06	5.22179e+06	4.19858e+06	7.87004e+06	3.69484e+06	5.29157e+06	5.34321e+06	6.18749e+06	6.50698e+06	5.45491e+06	5.91105e+06	6.11218e+06
2,2,6,6-Tetramethyl-4-piperidinone	0.419183	B(iii)			32.8364	156.138	forward	4.91889e+06	5.66427e+06	7.12786e+06	8.52302e+06	7.37925e+06	8.20326e+06	6.87125e+06	6.28386e+06	4.30423e+06	6.85674e+06	5.24172e+06	604045	5.52035e+06	5.79619e+06	4.4421e+06	6.72828e+06	6.76265e+06	6.19898e+06	3.86747e+06	6.90609e+06	4.07471e+06	5.37777e+06	6.29944e+06	5.37135e+06	5.79754e+06	4.7716e+06	4.42911e+06	7.33207e+06	4.40095e+06	5.91956e+06	6.64687e+06	4.50528e+06	5.15e+06	5.21635e+06	5.30451e+06	5.64669e+06	4.75529e+06
cis-5-Tetradecenoylcarnitine	0.41759	B(iii)			205.017	370.295	forward	6.23344e+06	4.65018e+06	1.29075e+07	2.39282e+07	2.21884e+07	3.29396e+07	6.07645e+07	5.76536e+07	9.65503e+06	1.18281e+07	1.09113e+07	4.15791e+06	1.94577e+07	5.6526e+07	7.20933e+07	2.33312e+07	5.86005e+06	4.40379e+06	2.39825e+07	8.67032e+06	2.32674e+07	3.95696e+07	2.1802e+07	2.42898e+07	1.00363e+07	1.21185e+07	1.37784e+07	1.35423e+07	1.05426e+07	7.54592e+06	2.02398e+07	3.81477e+07	2.36971e+07	2.19946e+07	2.24674e+07	2.19481e+07	2.25017e+07
PC(P-18:1(9Z)/18:2(9Z,12Z))	0.416434	B(iii)			164.302	768.589	forward	3.38351e+08	3.09761e+08	3.65088e+08	2.88148e+08	2.66918e+08	3.05712e+08	2.73687e+08	3.5228e+08	2.66997e+08	3.52782e+08	2.33884e+08	1.91189e+08	2.42063e+08	3.14548e+08	2.14682e+08	4.11598e+08	3.27643e+08	3.37709e+08	3.85156e+08	3.12237e+08	3.64242e+08	5.6725e+08	3.21278e+08	2.68037e+08	8.83633e+07	2.3054e+08	2.33296e+08	2.45575e+08	1.92524e+08	2.57734e+08	2.23278e+08	3.39946e+08	3.03705e+08	3.06639e+08	3.06478e+08	2.86215e+08	3.11643e+08
Jasmonic acid	0.4129	B(iii)			565.097	209.115	forward	1.14331e+06	1.47663e+06	1.17775e+06	1.10878e+06	1.18107e+06	1.22747e+06	1.17355e+06	1.50235e+06	1.37089e+06	1.19346e+06	877522	886036	1.03319e+06	1.05098e+06	1.17273e+06	1.1923e+06	1.28764e+06	1.17186e+06	1.34494e+06	1.01142e+06	1.19529e+06	1.15217e+06	1.41254e+06	1.28545e+06	1.10979e+06	1.37681e+06	1.06182e+06	1.10454e+06	1.02387e+06	1.09329e+06	1.12751e+06	1.17286e+06	1.10851e+06	1.06361e+06	1.09171e+06	1.1814e+06	1.09823e+06
(2R,3S)-Piscidic acid	0.412826	B(iii)			391.833	279.051	forward	1.24647e+07	5.29385e+07	2.31572e+07	1.84016e+07	5.31758e+07	5.4755e+07	6.09616e+07	1.987e+07	5.43579e+07	1.5486e+07	1.01707e+07	4.27134e+07	2.37276e+07	3.76857e+07	5.89332e+07	3.00117e+07	3.25707e+07	1.89627e+07	5.44071e+07	4.0451e+07	5.41241e+07	3.13627e+07	4.28246e+07	4.0824e+07	2.00828e+07	3.08072e+07	2.23703e+07	3.63375e+07	4.25231e+07	4.63573e+07	2.96471e+07	2.70072e+07	2.88641e+07	2.97253e+07	3.18294e+07	3.29765e+07	3.26353e+07
5-Methylcytidine	0.41197	B(iii)			410.748	256.095	forward	371465	1.72897e+06	810567	829853	1.66863e+06	1.61329e+06	1.8542e+06	574568	2.06503e+06	622412	359164	1.35531e+06	723391	1.28478e+06	1.72856e+06	1.27764e+06	768174	695815	1.26693e+06	1.28362e+06	2.07765e+06	912105	1.26585e+06	985757	498759	826691	755549	1.44823e+06	1.45883e+06	1.72253e+06	652897	623479	1.1048e+06	1.23091e+06	1.13136e+06	1.42914e+06	1.21296e+06
Eremopetasitenin B2	0.409487	B(iii)			499.44	465.185	forward	845681	1.34031e+06	1.37476e+06	836168	2.59623e+06	1.03468e+06	798519	1.56784e+06	1.22293e+06	926152	632298	474996	801680	1.09844e+06	1.33484e+06	1.08369e+06	1.17005e+06	995502	1.49817e+06	878809	1.31192e+06	1.08237e+06	3.332e+06	1.26706e+06	631998	1.29502e+06	996980	893703	1.0356e+06	1.0921e+06	959064	905333	980064	1.09481e+06	1.08138e+06	1.15751e+06	935633
Linamarin	0.408715	B(iii)			398.772	248.113	forward	8.06301e+06	1.48729e+07	8.51935e+06	1.80105e+07	1.21902e+07	1.24773e+07	1.70393e+07	3.35128e+06	2.33957e+07	1.80348e+07	1.47707e+07	5.24038e+07	2.85218e+07	1.219e+07	2.71226e+07	9.87804e+06	5.70754e+06	1.47013e+07	1.62359e+07	1.4723e+07	1.95775e+07	7.45873e+06	2.77263e+07	2.28158e+07	2.88152e+07	1.85855e+07	2.16458e+07	3.39596e+07	1.42216e+08	2.95369e+07	1.10941e+07	7.31599e+06	1.75793e+07	2.22183e+07	2.34608e+07	2.47795e+07	2.43151e+07
beta-D-Glucosamine	0.406934	B(iii)			415.204	214.048	forward	9.27878e+06	3.4633e+07	1.98187e+07	2.5697e+07	2.31364e+07	3.21945e+07	2.84918e+07	1.32674e+07	3.84945e+07	1.8543e+07	1.25103e+07	2.2459e+07	1.68182e+07	3.87002e+07	3.07787e+07	2.79655e+07	1.15638e+07	1.76443e+07	2.97579e+07	2.37775e+07	5.62836e+07	2.27072e+07	3.55734e+07	2.42094e+07	1.13179e+07	1.61054e+07	1.78598e+07	2.29136e+07	2.24039e+07	3.21734e+07	1.05213e+07	1.57079e+07	2.60185e+07	2.7286e+07	2.68995e+07	2.74575e+07	2.80267e+07
N-Ornithyl-L-taurine	0.406443	B(iii)			438.834	240.096	forward	2.31955e+07	1.55209e+07	1.67923e+07	2.52063e+07	1.91958e+07	2.3625e+07	1.48091e+07	1.50723e+07	1.37797e+07	1.97145e+07	3.18668e+07	3.06889e+07	2.59075e+07	2.06027e+07	1.41027e+07	1.69128e+07	1.55916e+07	3.07557e+07	8.90322e+06	2.26836e+07	9.82419e+06	1.37309e+07	9.66886e+06	1.52581e+07	1.83493e+07	1.31705e+07	1.78486e+07	2.94203e+07	1.62433e+07	1.8218e+07	1.5223e+07	1.8244e+07	1.84722e+07	1.93443e+07	1.95444e+07	1.91873e+07	1.69753e+07
PS(18:0/14:0)	0.406373	B(iii)			101.594	736.528	forward	443512	260656	99032	166633	3.4753e+06	428706	2.64875e+06	426512	2.05911e+06	2.18772e+06	3.7202e+06	5.73296e+06	1.28019e+06	1.9543e+06	3.66962e+06	1.00262e+06	0	177054	26407.2	296135	267539	61304.4	119107	95929.1	2.60754e+06	2.25315e+06	1.77556e+06	1.332e+06	2.86762e+06	1.95314e+06	3.08197e+06	193766	1.77836e+06	1.67546e+06	1.4977e+06	1.57422e+06	1.78935e+06
3'-Sialyllactose	0.405053	B(iii)			440.833	632.206	forward	210389	166889	203010	540604	174402	348719	153937	318233	204973	808503	582791	661548	522075	208059	564115	622746	119922	314259	533734	286133	404439	861689	462433	562045	1.14271e+06	361558	393963	1.08703e+06	382617	670255	204621	481941	458597	515464	364021	438001	447292
LysoPE(20:5(5Z,8Z,11Z,14Z,17Z)/0:0)	0.403585	B(iii)			216.174	500.277	forward	145851	211803	124839	188780	1.08997e+06	265474	2.39769e+06	177488	1.71482e+06	1.77612e+06	1.30867e+06	1.35141e+06	1.48221e+06	2.03497e+06	1.73701e+06	775340	90583.2	185770	144686	222989	151931	121487	178762	200876	4.97467e+06	1.53001e+06	1.50152e+06	1.38391e+06	1.20461e+06	1.34251e+06	1.10079e+06	107853	1.28409e+06	1.32244e+06	1.36035e+06	1.42641e+06	1.43874e+06
1,3,6-Trihydroxy-5-methoxyxanthone	0.403021	B(iii)			259.581	275.054	forward	2.07301e+06	1.86608e+06	3.73323e+06	2.13425e+06	2.66087e+06	2.43445e+06	1.94406e+06	2.61962e+06	2.35115e+06	3.79013e+06	4.07209e+06	3.568e+06	1.82747e+06	3.45947e+06	3.46994e+06	2.57901e+06	2.60719e+06	1.98572e+06	2.86167e+06	2.78543e+06	1.78099e+06	3.28297e+06	2.31076e+06	1.93399e+06	2.84525e+06	2.89887e+06	2.51097e+06	1.76578e+06	2.08734e+06	3.3764e+06	2.69537e+06	3.27281e+06	3.57989e+06	3.59782e+06	2.49486e+06	2.41096e+06	2.1934e+06
(Â±)-Conen	0.402201	B(iii)			384.036	305.087	forward	107109	352409	73508.1	775660	204154	521289	149420	517662	568706	1.06844e+06	672535	693502	1.10613e+06	207232	796119	1.14614e+06	33298.6	364674	1.08402e+06	268475	745264	1.24413e+06	844613	837743	1.10204e+06	433159	510068	1.97268e+06	526053	1.31877e+06	68440.9	301567	432993	786093	832613	713393	749593
PS(20:1(11Z)/15:0)	0.401098	B(iii)			81.5794	776.56	forward	3.55724e+06	5.85914e+06	6.57931e+06	4.4258e+06	1.42382e+07	5.98221e+06	1.44788e+07	7.90087e+06	8.82917e+06	1.53143e+07	9.90448e+06	9.29079e+06	1.14003e+07	8.62058e+06	1.7849e+07	1.19734e+07	9.1795e+06	6.71322e+06	3.53857e+06	7.80262e+06	6.83269e+06	8.32073e+06	6.85091e+06	6.10037e+06	1.12871e+07	1.25997e+07	9.61929e+06	1.64805e+07	1.50947e+07	1.40753e+07	1.63452e+07	4.92024e+06	1.30534e+07	1.32073e+07	1.7129e+07	1.26759e+07	6.62803e+06
PE(20:4(8Z,11Z,14Z,17Z)/P-16:0)	0.400264	B(iii)			127.98	724.528	forward	1.60934e+08	1.64667e+08	5.0274e+07	3.49204e+07	1.36517e+08	6.3531e+07	1.00099e+08	1.98852e+08	1.03324e+08	6.45904e+07	3.60733e+07	4.24202e+07	2.58422e+07	2.63511e+07	9.24827e+07	1.41389e+08	9.811e+07	8.8496e+07	1.47894e+08	5.91518e+07	1.67727e+08	1.7232e+08	1.00596e+08	1.64108e+08	2.25919e+07	3.22767e+07	2.88356e+07	3.77342e+07	8.88811e+07	3.43805e+07	8.69948e+07	5.8343e+07	5.77994e+07	6.28367e+07	3.75804e+07	4.22322e+07	1.27214e+08
Hesperetin	0.398432	B(iii)			438.532	301.077	forward	361438	275797	140445	317318	276125	385744	127436	219319	172688	216610	396778	410418	459591	186108	217420	263242	190132	414780	139307	233471	135869	122660	143478	260722	380555	129080	307487	490016	223279	221555	208557	276350	212498	221473	262295	240731	327910
(R)-Dihydromaleimide	0.398126	B(iii)			155.202	100.04	forward	7.12034e+06	7.51387e+06	4.5912e+06	2.9988e+06	5.08974e+06	3.99492e+06	1.12235e+07	1.38534e+06	5.7314e+06	6.30441e+06	8.60611e+06	6.53341e+06	7.24984e+06	7.56556e+06	1.72973e+06	4.97782e+06	4.91382e+06	6.46818e+06	718718	1.01637e+07	9.79746e+06	3.6269e+06	2.65812e+06	5.06284e+06	7.21546e+06	5.31735e+06	6.72599e+06	9.71017e+06	1.09109e+07	5.35063e+06	890233	1.05429e+06	5.63619e+06	5.20154e+06	5.42315e+06	5.4338e+06	4.9489e+06
(x)-1,2-Propanediol 1-O-b-D-glucopyranoside	0.397819	B(iii)			192.513	239.114	forward	2.29794e+07	2.5764e+07	1.93793e+07	1.55653e+07	1.28056e+07	1.85944e+07	1.0668e+07	1.62003e+07	1.23795e+07	1.25432e+07	9.01259e+06	1.38897e+07	1.38129e+07	2.01811e+07	3.12057e+07	2.02668e+07	1.81986e+07	1.87784e+07	3.40139e+07	9.59753e+06	2.56335e+07	1.19187e+07	2.05363e+07	2.50635e+07	1.72545e+07	1.64497e+07	2.3058e+07	2.46176e+07	1.4472e+07	1.87244e+07	2.39395e+07	9.15533e+06	1.71737e+07	1.53922e+07	2.44864e+07	1.69999e+07	2.27198e+07
Dantron	0.397027	B(iii)			196.391	239.04	forward	2.97305e+06	3.50231e+06	3.56084e+06	3.09897e+06	3.48624e+06	3.59604e+06	2.20662e+06	4.08565e+06	2.38626e+06	2.10536e+06	2.8789e+06	3.04e+06	2.49766e+06	2.83553e+06	5.10525e+06	2.77828e+06	3.73316e+06	3.66347e+06	2.65836e+06	2.75519e+06	3.26454e+06	3.41739e+06	2.83792e+06	4.27308e+06	3.43528e+06	3.41067e+06	2.62208e+06	2.81807e+06	2.68517e+06	2.62379e+06	2.70389e+06	3.76531e+06	2.75817e+06	2.93881e+06	2.90439e+06	2.99117e+06	3.11017e+06
PE(18:2(9Z,12Z)/14:0)	0.3969	B(iii)			175.52	688.492	forward	307492	276626	305734	437273	691541	500608	338339	438971	574473	582920	447886	1.03613e+06	734118	379907	462709	73634.2	272712	253768	250715	355013	231053	186613	348687	160539	1.12377e+06	685785	909375	516860	788039	549304	674809	124210	537559	689990	450593	375162	502319
PC(14:1(9Z)/P-18:0)	0.39652	B(iii)			167.625	716.559	forward	3.15745e+06	1.42511e+06	2.73414e+06	3.16292e+06	2.57318e+06	1.72023e+06	1.3219e+07	3.17837e+06	6.53937e+06	8.5526e+06	4.35852e+06	4.80777e+06	5.5729e+06	5.86243e+06	5.37379e+06	5.72736e+06	1.57039e+06	3.3092e+06	3.89286e+06	3.78746e+06	3.95801e+06	4.5808e+06	2.06825e+06	1.35152e+06	3.22478e+06	6.24792e+06	4.8706e+06	9.09525e+06	3.563e+06	7.01321e+06	5.33227e+06	2.78464e+06	4.85853e+06	4.63162e+06	4.65636e+06	4.74953e+06	5.24077e+06
Cycasin	0.395877	B(iii)			403.32	253.105	forward	1.06832e+06	1.291e+06	1.38382e+06	1.5943e+06	2.03219e+06	1.33455e+06	1.66761e+06	1.12554e+06	2.33823e+06	1.45282e+06	1.02924e+06	979690	2.06458e+06	1.80702e+06	843896	971023	2.49801e+06	1.60896e+06	1.73488e+06	1.80317e+06	2.08704e+06	1.83592e+06	921023	2.17087e+06	2.97161e+06	1.88181e+06	2.04362e+06	2.14324e+06	1.91152e+06	2.25398e+06	2.14759e+06	552355	1.55371e+06	1.44031e+06	1.7795e+06	1.69549e+06	1.42239e+06
Pyrroloquinoline quinone	0.395794	B(iii)			453.953	329.005	forward	3.59332e+06	5.35102e+06	4.11623e+06	3.46197e+06	3.01739e+06	3.75984e+06	6.05659e+06	3.89174e+06	5.48163e+06	3.67389e+06	5.84638e+06	3.03285e+06	3.45253e+06	5.04353e+06	4.40405e+06	1.32139e+06	5.24911e+06	3.51453e+06	4.1409e+06	6.08868e+06	4.81211e+06	4.05474e+06	4.90729e+06	3.60682e+06	3.40038e+06	4.07957e+06	5.04888e+06	5.14987e+06	5.84848e+06	4.49954e+06	3.85175e+06	5.23054e+06	4.64306e+06	4.63718e+06	4.18759e+06	4.15113e+06	4.15461e+06
PE(20:5(5Z,8Z,11Z,14Z,17Z)/P-18:0)	0.393246	B(iii)			122.841	750.543	forward	9.71074e+07	4.20965e+07	1.66811e+08	1.01236e+08	6.0634e+07	9.68905e+07	1.0187e+08	6.92026e+07	4.77074e+07	1.7916e+08	8.00367e+07	1.07984e+08	4.25161e+07	7.9897e+07	2.18132e+08	1.81877e+08	6.31006e+07	1.51953e+08	1.82588e+08	7.87266e+07	1.63841e+08	9.31968e+07	7.37143e+07	6.4237e+07	1.54787e+08	5.63696e+07	5.39559e+07	1.81621e+08	5.98083e+07	8.38679e+07	1.01369e+08	1.71782e+08	1.75915e+08	1.77927e+08	6.52211e+07	6.54827e+07	8.86195e+07
8-Hydroxypinoresinol 4-glucoside	0.392814	B(iii)			410.276	537.196	forward	1.32086e+06	7.60847e+06	2.90765e+06	3.44511e+06	7.26164e+06	8.22958e+06	7.8657e+06	3.06768e+06	1.09462e+07	2.14409e+06	1.82879e+06	8.36516e+06	4.35869e+06	7.20483e+06	8.20449e+06	6.2177e+06	5.10091e+06	3.45003e+06	7.26029e+06	7.56701e+06	1.12115e+07	5.70118e+06	7.48336e+06	6.67518e+06	4.33365e+06	4.26799e+06	5.17676e+06	8.01841e+06	7.37928e+06	1.0339e+07	3.65169e+06	2.77379e+06	6.75567e+06	6.18295e+06	6.8056e+06	5.98422e+06	6.33025e+06
Na,Na-Dimethylhistamine	0.392504	B(iii)			37.3584	140.118	forward	2.62406e+07	2.99907e+07	2.5606e+07	2.72978e+07	2.54836e+07	2.99712e+07	2.66541e+07	2.20601e+07	2.34482e+07	2.63829e+07	2.8601e+07	2.81104e+07	2.85443e+07	2.76787e+07	2.76843e+07	2.82901e+07	2.33248e+07	2.83859e+07	3.01974e+07	3.1457e+07	2.40949e+07	2.23759e+07	2.92604e+07	2.84651e+07	1.97612e+07	3.0471e+07	2.748e+07	3.07511e+07	2.55406e+07	2.66303e+07	2.51412e+07	2.83176e+07	2.42661e+07	2.46249e+07	3.13653e+07	3.39565e+07	2.11358e+07
Cis-zeatin	0.391497	B(iii)			277.307	254.08	forward	1.1239e+07	1.70582e+07	1.72363e+07	1.12989e+07	1.8054e+07	1.57471e+07	2.04899e+07	1.35834e+07	1.32684e+07	1.56947e+07	1.04554e+07	2.39592e+07	1.17349e+07	1.15076e+07	1.3024e+07	1.57658e+07	1.06536e+07	1.04119e+07	1.15764e+07	1.67764e+07	1.35544e+07	1.26068e+07	1.37701e+07	1.2497e+07	1.31424e+07	1.70338e+07	1.99705e+07	1.24832e+07	1.90479e+07	1.43885e+07	1.34069e+07	1.8448e+07	1.6413e+07	1.72602e+07	1.51678e+07	1.39503e+07	1.42742e+07
PS(15:0/18:0)	0.389764	B(iii)			176.475	750.543	forward	8.0977e+06	7.61189e+06	9.37892e+06	6.67592e+06	1.35203e+07	8.83556e+06	1.45576e+07	1.15351e+07	7.68231e+06	1.88979e+07	1.67575e+07	2.05767e+07	1.53322e+07	1.62104e+07	2.18995e+07	1.20939e+07	7.95649e+06	7.68125e+06	1.51998e+07	9.18634e+06	7.87999e+06	9.86138e+06	8.21191e+06	1.00572e+07	1.33964e+07	1.46333e+07	2.13568e+07	1.86334e+07	1.65412e+07	1.53197e+07	1.45328e+07	7.72561e+06	1.17453e+07	1.39431e+07	1.4327e+07	1.01904e+07	1.25845e+07
Adenosine diphosphate ribose	0.389419	B(iii)			420.016	558.065	forward	545230	611784	894533	782697	1.62051e+06	507852	901952	316209	783494	953742	919900	839848	1.42829e+06	1.18259e+06	992679	1.83261e+06	657148	186011	765047	462193	1.02669e+06	814549	868949	762212	348171	1.09423e+06	452828	915633	1.09047e+06	631812	437154	992520	907565	830964	1.02112e+06	908524	1.25143e+06
Pyridoxal	0.389048	B(iii)			480.361	168.066	forward	4.45582e+06	3.51117e+06	3.63071e+06	2.1806e+06	3.79982e+06	2.58474e+06	2.03298e+06	6.17277e+06	4.63284e+06	1.91657e+06	2.02698e+06	3.00995e+06	2.72891e+06	3.32032e+06	5.09014e+06	6.10732e+06	1.94112e+06	5.33021e+06	1.9087e+06	2.6236e+06	2.51566e+06	681856	2.53256e+06	1.04634e+06	1.23332e+06	2.06349e+06	2.47895e+06	1.17994e+06	2.25172e+06	2.37336e+06	1.82883e+06	3.25092e+06	2.69037e+06	2.55685e+06	3.43041e+06	2.94493e+06	3.30537e+06
17a-Ethynylestradiol	0.389044	B(iii)			56.9249	297.191	forward	457772	605838	1.50708e+06	2.35149e+06	500805	915798	628093	1.7868e+06	658107	969715	517410	2.22812e+06	538252	1.35858e+06	586060	783385	736568	1.13768e+06	653946	2.20253e+06	441199	633996	821601	1.0755e+06	1.55311e+06	363660	493179	1.73658e+06	525119	682362	847867	811625	1.15185e+06	1.06675e+06	1.06648e+06	1.06448e+06	994731
Glechomafuran	0.388892	B(iii)			334.752	231.134	forward	2.49817e+06	5.35132e+06	1.24806e+06	4.05345e+06	3.46943e+06	1.72865e+06	1.81811e+06	1.53903e+06	4.68906e+06	2.0831e+06	1.59834e+06	1.72236e+06	3.22338e+06	1.57038e+06	2.03332e+06	3.49729e+06	1.63934e+06	2.05698e+06	1.32465e+06	1.89446e+06	1.92492e+06	1.94136e+06	3.08508e+06	4.08204e+06	3.90451e+06	2.84802e+06	3.57393e+06	2.40894e+06	1.95021e+06	2.57301e+06	1.45557e+06	1.30527e+06	2.13255e+06	3.38935e+06	3.38684e+06	1.60189e+06	1.94287e+06
4-[(Hydroxymethyl)nitrosoamino]-1-(3-pyridinyl)-1-butanone	0.387376	B(iii)			425.259	224.103	forward	5.00094e+07	4.13281e+07	5.57596e+07	5.77262e+07	4.80455e+07	4.28917e+07	1.96222e+07	5.42771e+07	4.04856e+07	5.28972e+07	5.33614e+07	3.99596e+07	4.12305e+07	5.03656e+07	5.36577e+07	5.77943e+07	4.37942e+07	4.88614e+07	5.26224e+07	4.68775e+07	3.82065e+07	4.0755e+07	5.00168e+07	3.7061e+07	2.09345e+07	5.71164e+07	5.07289e+07	3.93107e+07	4.30967e+07	4.43068e+07	3.73098e+07	4.42188e+07	4.10363e+07	5.03062e+07	4.64919e+07	5.17173e+07	5.05536e+07
Dibutyl sulfide	0.385068	B(iii)			31.742	147.117	forward	3.09673e+06	4.71028e+06	3.30095e+06	4.66819e+06	4.01541e+06	3.85561e+06	2.90613e+06	4.07016e+06	2.7357e+06	5.22798e+06	2.7734e+06	5.38078e+06	3.45098e+06	4.96803e+06	4.64018e+06	4.18392e+06	5.26277e+06	3.43703e+06	4.34619e+06	5.24313e+06	6.01235e+06	3.96928e+06	4.68311e+06	4.94118e+06	1.74846e+06	4.79415e+06	5.38162e+06	5.04618e+06	3.33256e+06	4.00151e+06	4.80753e+06	4.07916e+06	5.70696e+06	5.51939e+06	5.39549e+06	6.01009e+06	5.8617e+06
Maltotriose	0.383864	B(iii)			472.472	503.163	forward	870884	1.42191e+06	1.34852e+06	2.54629e+06	1.42463e+06	2.11674e+06	1.04148e+06	2.01291e+06	1.4257e+06	2.82875e+06	2.10954e+06	1.58604e+06	2.99693e+06	1.54757e+06	3.78447e+06	4.0022e+06	462488	1.29655e+06	3.60619e+06	1.20352e+06	2.50062e+06	3.79476e+06	3.23537e+06	3.49572e+06	2.19465e+06	1.65438e+06	2.28056e+06	6.05072e+06	1.47078e+06	3.15974e+06	659927	1.63038e+06	2.30329e+06	2.72727e+06	2.93324e+06	2.8032e+06	2.68037e+06
2-(3,4-dihydroxyphenyl)-5,7-dihydroxy-3,6-dimethoxy-4H-chromen-4-one	0.383829	B(iii)			424.829	347.068	forward	1.03434e+06	1.0396e+06	1.39224e+06	1.6124e+06	1.23715e+06	1.03279e+06	726613	875286	1.25502e+06	1.53584e+06	1.39408e+06	1.48396e+06	1.55494e+06	1.36783e+06	1.1256e+06	1.52211e+06	1.098e+06	1.00652e+06	1.42449e+06	1.17304e+06	1.25952e+06	1.10888e+06	1.31878e+06	1.43812e+06	827231	1.35108e+06	1.96869e+06	1.51516e+06	1.19921e+06	1.9038e+06	800246	1.41534e+06	1.24917e+06	1.47145e+06	1.18534e+06	1.43112e+06	1.39685e+06
5-Acetylamino-6-formylamino-3-methyluracil	0.383243	B(iii)			319.932	227.078	forward	3.57489e+08	3.27433e+08	5.20292e+08	2.74145e+08	3.19347e+08	3.43057e+08	3.67812e+08	3.34193e+08	2.87591e+08	4.11804e+08	3.19433e+08	3.13082e+08	2.59557e+08	3.81641e+08	3.59467e+08	3.28703e+08	3.30593e+08	2.81326e+08	4.04471e+08	2.97566e+08	3.03644e+08	4.12614e+08	3.97536e+08	3.52153e+08	3.83728e+08	3.83947e+08	3.07143e+08	2.92879e+08	3.21381e+08	3.99688e+08	2.9701e+08	3.97172e+08	3.55147e+08	3.99209e+08	3.42784e+08	3.3393e+08	3.12837e+08
PI(18:2(9Z,12Z)/18:2(9Z,12Z))	0.381865	B(iii)			207.143	859.533	forward	306321	221505	377475	236784	114837	301961	82784.8	184296	283911	271160	189284	234349	456838	305728	280969	230719	210937	319818	191445	386209	421342	295023	136412	124604	266582	198019	369341	386642	210223	472123	134920	332956	268246	361139	406628	468574	164234
Vinylacetylglycine	0.381862	B(iii)			376.673	144.066	forward	3.51822e+06	3.66787e+06	4.17933e+06	3.56465e+06	3.29411e+06	3.4991e+06	4.51761e+06	4.25999e+06	3.9915e+06	3.69686e+06	3.89521e+06	4.13006e+06	4.3641e+06	3.7646e+06	4.27343e+06	3.87961e+06	3.64079e+06	4.29927e+06	4.44523e+06	4.19713e+06	4.17347e+06	3.74871e+06	3.91848e+06	4.37707e+06	3.27156e+06	3.69546e+06	4.02501e+06	3.99652e+06	3.65579e+06	4.27644e+06	3.79137e+06	4.28961e+06	3.30441e+06	4.62823e+06	4.35604e+06	3.82706e+06	4.31823e+06
Guanosine monophosphate	0.380698	B(iii)			508.552	362.051	forward	2.32839e+06	2.73198e+06	2.58752e+06	4.24357e+06	2.35448e+06	4.59303e+06	4.05297e+06	2.11998e+06	2.0007e+06	3.27183e+06	7.66811e+06	6.52984e+06	2.30132e+07	3.12386e+06	2.52485e+06	2.5966e+06	3.82407e+06	2.32685e+06	3.40838e+06	6.07197e+06	4.10665e+06	4.50249e+06	3.08358e+06	2.82622e+06	4.95314e+06	2.55916e+06	3.23489e+06	3.82712e+06	3.18815e+06	3.44095e+06	5.17238e+06	4.40826e+06	1.78248e+06	3.55793e+06	3.7138e+06	5.10411e+06	6.26942e+06
PE(P-18:1(11Z)/18:2(9Z,12Z))	0.380545	B(iii)			136.218	726.544	forward	3.90047e+07	6.53858e+07	2.96204e+07	4.3477e+07	1.88969e+07	1.55649e+07	1.7131e+07	5.08164e+07	1.94143e+07	1.27325e+07	1.22365e+07	1.73995e+07	1.53303e+07	1.87229e+07	1.17314e+07	2.12433e+07	2.24608e+07	3.63058e+07	3.68037e+07	2.89425e+07	5.88229e+07	2.72029e+07	5.55852e+07	3.29819e+07	9.07756e+06	1.29948e+07	1.0135e+07	1.75989e+07	1.16586e+07	1.32056e+07	1.29409e+07	2.50744e+07	1.09826e+07	1.96351e+07	1.98563e+07	1.70556e+07	1.94214e+07
Thiamine triphosphate	0.380464	B(iii)			497.413	505.004	forward	5.43078e+06	4.47709e+06	622452	532965	4.41223e+06	1.3519e+06	1.52662e+06	9.85302e+06	9.35256e+06	436584	2.68994e+06	195890	2.87821e+06	4.75413e+06	5.09343e+06	3.00761e+06	1.44105e+06	580706	1.21073e+06	886712	2.68104e+06	1.12792e+06	3.79161e+06	959155	156498	1.28179e+06	2.40373e+06	1.54207e+06	756007	1.46383e+06	1.05446e+06	3.35058e+06	1.64954e+06	2.09204e+06	2.26387e+06	1.99395e+06	1.71067e+06
N4-Acetylsulfamethoxazole	0.379191	B(iii)			410.178	296.066	forward	1.44097e+08	3.18279e+08	2.26192e+08	2.48463e+08	3.27797e+08	3.35994e+08	3.53349e+08	2.23088e+08	3.51556e+08	2.11902e+08	2.041e+08	3.14852e+08	3.20049e+08	3.59389e+08	3.46584e+08	3.43098e+08	2.44124e+08	2.33224e+08	2.99746e+08	3.24388e+08	3.82851e+08	2.71635e+08	3.35635e+08	3.35913e+08	2.81847e+08	2.58508e+08	3.07913e+08	3.87947e+08	3.24092e+08	3.83983e+08	2.03197e+08	2.08935e+08	3.08421e+08	3.20052e+08	3.09522e+08	3.24091e+08	3.13271e+08
gamma-Glutamylcysteinylserine	0.378744	B(iii)			380.543	338.108	forward	999198	93400	534836	2.44335e+06	1.13814e+06	888478	627079	1.51705e+06	693829	2.68014e+06	3.21294e+06	1.61939e+06	4.07101e+06	655121	2.54261e+06	2.7891e+06	196225	1.35886e+06	2.63801e+06	926295	1.18748e+06	4.74975e+06	1.87216e+06	2.06429e+06	4.90963e+06	1.14661e+06	1.84738e+06	5.01562e+06	867625	2.22739e+06	233847	1.6284e+06	1.37903e+06	1.89864e+06	1.46667e+06	1.58414e+06	2.40643e+06
Cis-Caffeoyl tartaric acid	0.378433	B(iii)			234.639	313.052	forward	682243	602139	721042	474495	661815	445260	670751	552663	427025	666405	958013	673414	376005	473104	518177	520593	499102	519746	581665	476278	759902	827672	557555	441356	749744	795168	557313	640013	809480	449692	516430	695420	734444	600555	572740	594412	486730
2,5-Dichloro-carboxymethylenebut-2-en-4-olide	0.377859	B(iii)			423.577	208.939	forward	1.28527e+06	1.61198e+06	1.59035e+06	1.76257e+06	1.84794e+06	1.55718e+06	2.07884e+06	858899	1.88359e+06	2.04342e+06	1.88102e+06	2.28474e+06	2.19353e+06	1.76478e+06	1.35281e+06	2.00253e+06	1.79616e+06	1.14742e+06	1.53732e+06	1.85349e+06	2.07793e+06	1.89811e+06	1.54061e+06	2.13466e+06	2.34756e+06	1.44891e+06	2.41486e+06	2.78979e+06	2.06901e+06	3.11276e+06	1.34651e+06	1.90896e+06	1.77538e+06	2.04233e+06	1.93974e+06	2.08061e+06	1.9968e+06
11-Oxo-androsterone glucuronide	0.377527	B(iii)			439.885	481.253	forward	405332	358469	892129	781342	695061	568830	1.71678e+06	666534	818941	778355	664562	379497	472697	1.01748e+06	410328	928652	1.10085e+06	712203	1.13107e+06	899717	1.07815e+06	1.09373e+06	1.00821e+06	666486	389049	1.02602e+06	587401	649221	593004	661518	1.11118e+06	819102	933995	878788	805132	900873	760323
5,7-Dihydroxyflavone	0.377005	B(iii)			313.152	253.032	forward	2.01655e+06	2.24488e+06	2.35982e+06	2.33104e+06	2.82381e+06	1.32005e+06	1.06199e+07	1.78024e+06	4.30049e+06	5.09387e+06	2.14155e+06	130886	2.75969e+06	3.10765e+06	1.82135e+06	2.98546e+06	1.80938e+06	1.07079e+06	2.33441e+06	2.11026e+06	3.66934e+06	3.9881e+06	3.40409e+06	3.17567e+06	2.42404e+06	3.92558e+06	3.76721e+06	3.20359e+06	4.69647e+06	2.15138e+06	1.48192e+06	1.95366e+06	3.06441e+06	3.14456e+06	3.1631e+06	3.27378e+06	2.86287e+06
PE(20:3(5Z,8Z,11Z)/14:0)	0.376895	B(iii)			173.266	714.508	forward	1.59823e+06	1.78384e+06	2.06455e+06	1.39554e+06	4.9255e+06	2.85672e+06	5.39281e+06	1.30406e+06	2.9279e+06	3.25557e+06	2.82554e+06	2.7248e+06	2.83367e+06	2.07043e+06	2.9102e+06	663396	1.53069e+06	2.72606e+06	646725	1.938e+06	1.62994e+06	610874	1.67334e+06	1.69654e+06	2.46124e+06	3.69455e+06	4.53411e+06	3.74104e+06	4.45815e+06	2.26026e+06	3.67043e+06	725295	2.65428e+06	3.09979e+06	1.87597e+06	1.76643e+06	2.66449e+06
3,4-Dihydro-8-hydroxy-3-(3-hydroxy-4-methoxyphenyl)-1H-2-benzopyran-1-one	0.372975	B(iii)			238.269	287.099	forward	1.81183e+06	1.28881e+06	2.08066e+06	1.66844e+06	1.78138e+06	1.59942e+06	1.30756e+06	1.57523e+06	1.52698e+06	2.01675e+06	1.94967e+06	1.73011e+06	1.61729e+06	1.55377e+06	2.07864e+06	1.60541e+06	1.94736e+06	1.6027e+06	1.8783e+06	1.59284e+06	1.32586e+06	1.48638e+06	1.55981e+06	1.64472e+06	1.58674e+06	2.0782e+06	1.44807e+06	1.47583e+06	1.55478e+06	1.6712e+06	1.58317e+06	2.09012e+06	1.21356e+06	1.94362e+06	1.54929e+06	1.55608e+06	1.61779e+06
11-beta-Hydroxyandrosterone-3-glucuronide	0.372755	B(iii)			54.6581	483.251	forward	227979	277301	104748	177230	127209	163681	79269.9	476677	168629	99599.6	58919.9	90016.3	101631	60342.4	46471.5	189277	265448	247304	238181	253713	170282	293161	278929	124281	26819.3	66574.4	91437.5	47552.2	67902.7	72865.6	86443	262973	126349	157936	119231	122409	121597
(R)-Pelletierine	0.371319	B(iii)			32.8355	142.123	forward	5.23927e+06	4.94623e+06	4.91875e+06	7.73075e+06	4.67199e+06	5.97554e+06	5.47862e+06	5.23733e+06	2.87705e+06	4.9594e+06	5.48521e+06	7.12435e+06	4.22636e+06	5.25087e+06	4.9803e+06	5.72912e+06	4.24576e+06	5.10699e+06	4.68e+06	5.76307e+06	3.85098e+06	4.50311e+06	6.95047e+06	4.36217e+06	3.18159e+06	5.32532e+06	4.96244e+06	5.84706e+06	3.50981e+06	5.17409e+06	8.15593e+06	4.50952e+06	7.02239e+06	7.15079e+06	7.2095e+06	7.07872e+06	7.98608e+06
PE(16:0/20:4(5Z,8Z,11Z,14Z))	0.370659	B(iii)			171.958	740.522	forward	1.31112e+07	1.08117e+07	1.43615e+07	1.16839e+07	8.78788e+06	2.03341e+07	4.81003e+06	6.11798e+06	2.04107e+06	6.28602e+06	6.97052e+06	6.47637e+06	5.73393e+06	3.54596e+06	5.37898e+06	6.1788e+06	9.46587e+06	1.5838e+07	7.43271e+06	1.35788e+07	1.36111e+07	6.29502e+06	1.06743e+07	9.43209e+06	1.47547e+07	7.93858e+06	8.42748e+06	7.81035e+06	1.03666e+07	4.76568e+06	6.48419e+06	1.28331e+07	8.10147e+06	6.67265e+06	8.81177e+06	7.76694e+06	7.3021e+06
1-nitrosonaphthalene	0.369685	B(iii)			60.3334	158.06	forward	5.13301e+06	8.78993e+06	4.70993e+06	9.61113e+06	1.13145e+07	2.22597e+07	2.13748e+07	8.33772e+06	9.37978e+06	3.05546e+06	7.54531e+06	2.52984e+06	4.44424e+06	7.2989e+06	1.72356e+07	7.65643e+06	3.20283e+06	1.19216e+07	5.20646e+06	9.34332e+06	1.02601e+07	1.14238e+07	7.64423e+06	1.14178e+07	2.79492e+06	3.99456e+06	3.69674e+06	8.46429e+06	3.74347e+06	3.70476e+06	1.11962e+07	1.15543e+07	5.74664e+06	3.81494e+06	5.72229e+06	4.36367e+06	2.90049e+06
8-Anilino-1-naphthalene sulfonate	0.368539	B(iii)			432.974	300.068	forward	203033	207332	228789	191121	196258	192438	210549	242622	206835	260910	168622	139061	207622	217535	207844	163076	261567	204815	232062	222691	281280	208419	203667	221363	229573	253636	199626	171486	192778	234865	285199	237709	190564	204175	207158	188639	155302
Ubiquinone-4	0.366539	B(iii)			216.314	455.323	forward	432684	123975	350975	432432	208853	508702	368989	261065	70920.7	699133	106598	650349	238244	268022	175027	309673	203561	321133	513268	359134	268968	395124	349783	582179	137168	624454	241400	626900	263478	435888	348769	247888	224277	440558	368112	422696	495015
2,3,6,7-Tetrahydro-6,7-dimethylcyclopent[b]azepin-8(1H)-one	0.364529	B(iii)			261.558	178.123	forward	2.20443e+06	1.5929e+06	1.87467e+06	1.66458e+06	2.01843e+06	1.80555e+06	1.76823e+06	1.86547e+06	1.6154e+06	1.81495e+06	2.32488e+06	2.63642e+06	3.59642e+06	2.69457e+06	1.87058e+06	1.66726e+06	4.39209e+06	2.22663e+06	2.20781e+06	3.43551e+06	1.71611e+06	1.84724e+06	1.71146e+06	1.87467e+06	5.16051e+06	2.17371e+06	2.04019e+06	1.67293e+06	2.73352e+06	1.50678e+06	2.06887e+06	2.52414e+06	1.92226e+06	1.81889e+06	1.78461e+06	1.85782e+06	1.54011e+06
Garcimangosone A	0.36347	B(iii)			277.483	461.199	forward	500637	1.32849e+06	1.02179e+06	826367	1.41971e+06	724801	1.55582e+06	574788	721754	634420	409141	2.9045e+06	758501	383754	382413	1.13014e+06	386438	514587	346042	1.27575e+06	808267	383354	542303	671130	627708	1.22451e+06	1.76815e+06	706575	1.49815e+06	627881	728106	1.28284e+06	579528	801851	900178	910576	801431
PE(P-16:0/18:4(6Z,9Z,12Z,15Z))	0.363159	B(iii)			165.161	696.497	forward	1.59589e+06	893931	862975	924150	899327	1.07337e+06	866391	640534	404215	1.07089e+06	730322	925494	912747	761972	1.0583e+06	552324	1.25387e+06	650915	982938	635967	1.1295e+06	840527	759232	875131	1.03907e+06	644592	864587	1.0612e+06	1.02339e+06	788452	772933	1.00968e+06	1.31264e+06	1.00712e+06	854761	614098	883287
Gomphrenol 3-methylether 4'-glucuronide	0.362297	B(iii)			29.4454	505.088	forward	30015.8	16304.6	42278	24322	47178.2	21000.3	90644.6	0	20058.3	34524.3	13764.9	0	57771.9	27873.4	32558.8	0	0	0	41854.3	64157.4	44900.4	56853.1	91594.9	77326.3	0	84958.4	46986.2	45552.5	0	38383.4	43458	24999.5	2.97492e+06	2.99122e+06	3.26622e+06	2.76276e+06	2.39629e+06
Saxitoxin	0.36188	B(iii)			459.821	300.142	forward	8.78232e+06	1.14368e+07	9.86618e+06	9.86433e+06	1.07296e+07	8.4047e+06	9.34067e+06	1.03073e+07	9.89072e+06	9.38419e+06	8.33007e+06	5.83849e+06	9.06087e+06	7.54086e+06	8.79015e+06	9.27646e+06	1.1665e+07	9.22207e+06	1.12011e+07	1.02813e+07	1.22463e+07	1.01431e+07	1.04874e+07	1.30018e+07	1.25634e+07	1.15352e+07	1.07803e+07	1.0547e+07	1.11598e+07	1.10891e+07	1.27516e+07	8.0853e+06	8.57951e+06	9.25034e+06	1.0943e+07	1.00081e+07	1.06699e+07
O-Geranylvanillin	0.361805	B(iii)			562.209	289.187	forward	4.10016e+06	634776	6.47966e+06	5.58045e+06	1.7449e+06	2.07589e+06	214541	6.24878e+06	3.48858e+06	3.28223e+06	4.44325e+06	3.02644e+06	1.48725e+06	9.43081e+06	1.73995e+06	2.35154e+06	3.10491e+06	416367	2.58119e+06	3.29148e+06	2.0839e+06	3.43892e+06	3.02604e+06	752727	357582	4.63096e+06	158519	1.32872e+06	594406	143881	2.72871e+06	674252	1.61887e+06	3.35729e+06	3.08654e+06	3.33582e+06	3.5434e+06
Glutamylalanine	0.359344	B(iii)			444.322	219.098	forward	9.74927e+06	9.95692e+06	7.15246e+06	1.03532e+07	7.03527e+06	8.4859e+06	1.00915e+07	8.9565e+06	9.87769e+06	1.16403e+07	1.76175e+07	1.21108e+07	8.83712e+06	1.56225e+07	7.76195e+06	8.67882e+06	5.82722e+06	1.09595e+07	4.73078e+06	1.14302e+07	7.48558e+06	1.00152e+07	5.45325e+06	4.31974e+06	1.28279e+07	7.5555e+06	6.2149e+06	1.04035e+07	9.91277e+06	4.29195e+06	9.37166e+06	7.39593e+06	7.3727e+06	8.04958e+06	8.2679e+06	8.73683e+06	9.31067e+06
Isoniazid alpha-ketoglutaric acid	0.35924	B(iii)			257.849	266.075	forward	2.24443e+06	2.51094e+06	2.67364e+06	2.74437e+06	3.1396e+06	3.86904e+06	7.92478e+06	2.82176e+06	2.7237e+06	2.54573e+06	2.58118e+06	2.86019e+06	3.04858e+06	4.01388e+06	3.08422e+06	1.85365e+06	1.92341e+06	2.02883e+06	1.78251e+06	3.01785e+06	3.60409e+06	3.35182e+06	3.28965e+06	2.94756e+06	1.59235e+06	1.96935e+06	1.95092e+06	2.35965e+06	3.04217e+06	3.60094e+06	2.27432e+06	4.41589e+06	3.14736e+06	3.23677e+06	3.08619e+06	2.94246e+06	3.22574e+06
delta3,5-Deoxytigogenin	0.357547	B(iii)			202.549	397.314	forward	3.47675e+06	1.94008e+06	4.5353e+06	6.22934e+06	3.62817e+06	1.10126e+07	1.22239e+07	1.26573e+07	1.9007e+06	200906	2.05588e+06	165044	3.12948e+06	6.61082e+06	127053	4.37916e+06	2.71358e+06	1.50962e+06	5.73202e+06	139869	7.15611e+06	1.17704e+07	5.95313e+06	5.90049e+06	1.93003e+06	2.12778e+06	3.25097e+06	193006	2.16667e+06	1.97033e+06	3.01892e+06	8.26551e+06	4.97778e+06	5.2965e+06	156477	5.29527e+06	4.84262e+06
Isosalsolidine	0.356836	B(iii)			445.246	204.098	forward	5.55892e+06	3.92008e+06	3.81125e+06	4.66108e+06	4.55617e+06	5.4255e+06	5.05186e+06	4.64122e+06	4.83826e+06	4.30475e+06	7.79049e+06	6.37954e+06	5.01316e+06	4.94814e+06	4.34836e+06	4.51273e+06	5.5991e+06	5.53697e+06	4.28731e+06	4.93352e+06	3.30545e+06	3.65482e+06	3.92021e+06	3.3555e+06	5.73662e+06	3.89003e+06	4.56095e+06	5.17067e+06	3.701e+06	5.61253e+06	6.82198e+06	4.92591e+06	3.97385e+06	4.9961e+06	5.05018e+06	3.84316e+06	5.55066e+06
PI(18:1(9Z)/18:1(9Z))	0.356109	B(iii)			209.302	880.59	forward	6.22316e+06	1.08887e+07	6.46525e+06	8.95779e+06	8.06084e+06	7.09398e+06	8.08225e+06	9.34795e+06	7.21097e+06	4.97851e+06	6.51547e+06	5.05526e+06	6.58e+06	6.98466e+06	7.22357e+06	6.21886e+06	7.15952e+06	8.67473e+06	6.73019e+06	8.11443e+06	8.27949e+06	7.4199e+06	8.11596e+06	7.03785e+06	4.66985e+06	5.84835e+06	5.78983e+06	5.70112e+06	7.09788e+06	5.96632e+06	7.25935e+06	7.82235e+06	6.73062e+06	6.69135e+06	6.11865e+06	6.22371e+06	5.97396e+06
PC(P-18:0/20:5(5Z,8Z,11Z,14Z,17Z))	0.354	B(iii)			90.1742	792.59	forward	1.28253e+07	1.7037e+07	2.25407e+07	1.19272e+07	4.68542e+07	2.13591e+07	7.74735e+07	2.03898e+07	7.77753e+07	7.60273e+07	2.83417e+07	2.65032e+07	5.12555e+07	2.21269e+08	6.66992e+07	6.78535e+07	2.23415e+07	2.07364e+07	1.59795e+07	1.62824e+07	1.96435e+07	3.39934e+07	2.32872e+07	2.00727e+07	9.89371e+07	6.01769e+07	4.37151e+07	5.07549e+07	6.07978e+07	5.7874e+07	4.92505e+07	1.24074e+07	1.07379e+08	4.62535e+07	2.79927e+07	5.0689e+07	1.27593e+08
Linoleyl carnitine	0.353998	B(iii)			200.273	424.342	forward	1.80063e+08	1.8603e+08	1.41567e+08	5.19773e+07	3.35963e+08	3.60141e+08	3.4765e+08	2.85924e+08	2.57303e+08	2.83934e+08	3.34978e+08	5.31106e+08	3.73155e+08	5.71652e+08	8.01459e+08	4.78909e+08	2.00615e+08	1.65536e+08	2.97568e+08	1.39425e+08	1.98574e+08	2.50309e+08	2.11615e+08	4.03849e+08	2.92241e+08	1.26816e+08	3.38398e+08	3.11679e+08	6.10635e+08	6.5285e+08	3.12753e+08	3.75463e+08	3.31495e+08	3.56329e+08	3.56166e+08	3.55358e+08	3.50255e+08
trans-Hexadec-2-enoyl carnitine	0.353497	B(iii)			201.494	398.326	forward	5.80596e+07	5.96332e+07	7.98765e+07	1.45466e+08	1.45144e+08	1.54182e+08	3.30152e+08	1.70082e+08	8.83272e+07	1.13681e+08	9.25795e+07	4.08769e+07	1.5592e+08	2.27112e+08	2.3691e+08	1.05019e+08	4.89974e+07	2.66815e+07	9.24693e+07	7.06866e+07	1.53918e+08	1.65857e+08	1.00804e+08	1.17816e+08	7.40652e+07	1.01643e+08	1.5195e+08	1.11633e+08	1.04576e+08	7.99169e+07	1.24517e+08	1.30804e+08	1.20657e+08	1.27196e+08	1.29608e+08	1.34028e+08	1.26467e+08
2-(3-Hydroxyphenyl)ethanol 1'-glucoside	0.352678	B(iii)			563.28	301.126	forward	422340	774729	480023	359597	801168	613188	501176	506797	500437	510450	208836	267607	535771	322283	604423	702838	656654	688025	788770	368493	726432	550922	549262	546715	471961	514834	541873	618404	629540	461439	658388	510055	457823	608511	595281	689294	585278
2-Dodecylbenzenesulfonic acid	0.352479	B(iii)			73.0537	327.201	forward	41576.8	212448	63580.7	272304	411775	341647	265783	210543	230048	124855	51592.8	440613	196209	187295	268113	562855	214444	65519.7	157718	152785	177443	3.41277e+06	1.71924e+06	227577	4.63824e+06	85394.8	581468	72250.2	140888	176396	149677	38998.7	2.22659e+06	2.36967e+06	2.17777e+06	2.42008e+06	2.44729e+06
Isovalerylglycine	0.352242	B(iii)			204.276	158.081	forward	1.67952e+06	3.24995e+06	1.63862e+06	2.08477e+06	2.21025e+06	2.33061e+06	2.31476e+06	1.81511e+06	2.12253e+06	1.70167e+06	1.61846e+06	2.72222e+06	1.88924e+06	1.55042e+06	1.76278e+06	1.81184e+06	2.79449e+06	1.67395e+06	1.9632e+06	1.7766e+06	3.11943e+06	1.71375e+06	1.96585e+06	1.31625e+06	5.65358e+06	1.86172e+06	2.74167e+06	2.55208e+06	2.36084e+06	4.8629e+06	2.68031e+06	1.75545e+06	2.37791e+06	2.00355e+06	2.29805e+06	2.84153e+06	2.36257e+06
7-Methylxanthine	0.351886	B(iii)			369.848	165.04	forward	1.64693e+06	2.63692e+06	2.1946e+06	1.60164e+06	2.3512e+06	3.31177e+06	1.91166e+06	1.14015e+06	1.60028e+06	1.6091e+06	1.58032e+06	2.18196e+06	3.45219e+06	5.24061e+06	2.18513e+06	2.37826e+06	3.15142e+06	1.37371e+06	1.30212e+06	1.87449e+06	3.8205e+06	1.89446e+06	1.98236e+06	1.89339e+06	3.1973e+06	2.07214e+06	1.58658e+06	1.14851e+06	1.85828e+06	3.82279e+06	2.71985e+06	2.16094e+06	1.42087e+06	1.76016e+06	1.66717e+06	2.11836e+06	2.18474e+06
SM(d18:0/18:0)	0.351863	B(iii)			199.251	733.622	forward	1.00456e+07	7.25509e+06	9.87842e+06	6.69226e+06	5.05026e+06	6.07107e+06	1.02831e+07	1.51471e+07	4.02783e+06	4.81458e+06	8.28217e+06	7.41718e+06	6.83709e+06	8.25486e+06	5.07719e+06	1.41626e+07	3.90761e+06	1.03997e+07	2.47922e+07	5.01862e+06	1.38979e+07	5.47775e+06	5.759e+06	1.82353e+07	5.04458e+06	8.34545e+06	5.93466e+06	8.70061e+06	4.60916e+06	7.16178e+06	1.07489e+07	5.98735e+06	1.07949e+07	5.17211e+06	8.42217e+06	8.52657e+06	3.82264e+06
17-Epiestriol	0.349564	B(iii)			544.048	289.187	forward	6.34373e+07	2.28643e+07	9.45366e+07	8.58161e+07	2.66063e+07	3.5696e+07	1.14282e+07	1.09407e+08	6.03878e+07	5.06889e+07	6.50649e+07	4.43054e+07	2.56743e+07	1.59839e+08	4.55969e+07	5.18506e+07	5.18843e+07	9.97732e+06	4.73995e+07	4.73841e+07	3.783e+07	5.48874e+07	5.23768e+07	1.5032e+07	1.39153e+07	8.35037e+07	5.2865e+06	1.77764e+07	1.19038e+07	1.22364e+07	4.77474e+07	1.75697e+07	3.12846e+07	5.1756e+07	4.87051e+07	5.21913e+07	5.20513e+07
PE(20:5(5Z,8Z,11Z,14Z,17Z)/P-16:0)	0.34683	B(iii)			103.163	722.513	forward	1.24037e+06	1.84179e+06	2.47795e+06	1.45778e+06	2.3464e+07	2.58323e+06	9.22332e+07	4.00509e+06	2.44498e+07	3.56594e+07	2.64517e+07	2.22342e+07	1.23795e+07	2.17943e+07	3.49443e+07	1.48148e+07	2.06391e+06	3.99648e+06	1.78883e+06	1.95772e+06	976835	2.2509e+06	2.30316e+06	2.74961e+06	2.83181e+07	7.56449e+07	1.96861e+07	3.60622e+07	2.91154e+07	2.75076e+07	1.85004e+07	672495	2.16186e+07	2.00336e+07	1.96951e+07	1.87573e+07	2.05645e+07
Elaidic carnitine	0.345754	B(iii)			198.072	426.357	forward	2.4232e+08	3.29632e+08	4.10346e+08	6.79915e+08	7.12679e+08	7.29666e+08	1.36957e+09	7.83301e+08	3.33557e+08	4.55182e+08	3.08566e+08	2.17622e+08	5.64109e+08	7.7036e+08	8.89484e+08	4.47021e+08	2.80434e+08	1.28365e+08	4.50448e+08	3.89019e+08	8.14758e+08	7.18548e+08	4.27563e+08	5.49997e+08	3.11463e+08	3.83559e+08	4.43595e+08	3.63039e+08	3.59167e+08	3.16706e+08	4.84356e+08	6.30946e+08	5.08505e+08	5.2391e+08	5.29581e+08	5.36893e+08	5.63012e+08
Gravacridonetriol	0.343485	B(iii)			301.104	358.135	forward	0	553382	239736	719324	263406	709186	82950	292339	285592	395253	329141	233545	909355	133995	297140	892566	281771	163672	927323	285006	207524	1.37127e+06	465638	1.24192e+06	2.87612e+06	309382	354810	1.30071e+06	446397	1.72131e+06	31062.8	158578	662665	456203	381813	551756	484066
Carbanilide	0.343124	B(iii)			310.895	213.098	forward	2.00106e+06	2.12308e+06	2.36241e+06	2.3804e+06	2.36464e+06	2.60259e+06	1.98281e+06	1.95147e+06	1.82424e+06	1.97617e+06	2.21519e+06	3.00393e+06	2.06911e+06	2.19065e+06	2.16826e+06	2.42004e+06	2.70589e+06	2.52579e+06	2.84118e+06	2.13224e+06	2.20263e+06	2.29261e+06	2.02814e+06	1.80128e+06	2.74128e+06	1.93589e+06	2.0578e+06	2.58519e+06	2.01624e+06	2.68467e+06	2.082e+06	1.92382e+06	1.96141e+06	2.3423e+06	2.17178e+06	2.21107e+06	2.22965e+06
PS(22:2(13Z,16Z)/15:0)	0.342481	B(iii)			157.621	802.574	forward	625432	814577	441223	751605	1.15462e+06	564480	1.29442e+06	422837	867371	1.24714e+06	1.2196e+06	873384	1.0417e+06	1.26838e+06	1.39209e+06	710494	477781	698342	490677	892564	750519	917483	752148	843866	1.73387e+06	954421	1.73789e+06	1.01576e+06	1.64881e+06	1.54078e+06	1.09819e+06	573594	703464	804487	559921	580945	1.03697e+06
PE(P-18:1(11Z)/22:5(4Z,7Z,10Z,13Z,16Z))	0.341029	B(iii)			159.787	776.559	forward	5.20291e+07	5.00834e+07	4.98778e+07	5.09176e+07	8.73277e+07	5.21067e+07	9.63317e+07	6.93207e+07	9.64135e+07	1.01842e+08	1.09131e+08	1.08443e+08	1.08786e+08	1.14654e+08	1.13886e+08	1.02202e+08	6.71418e+07	6.65396e+07	5.70257e+07	5.84237e+07	4.89302e+07	6.11775e+07	5.74444e+07	6.15435e+07	9.70114e+07	9.8024e+07	1.10671e+08	1.07959e+08	1.15681e+08	1.11479e+08	1.28499e+08	5.11359e+07	8.2176e+07	8.01433e+07	7.81281e+07	7.71584e+07	7.8695e+07
Malvidin 3-(6-acetylglucoside)	0.339792	B(iii)			28.3312	536.166	forward	666038	862599	1.03165e+06	887198	923244	851385	895873	709103	818144	709063	808971	631499	1.09626e+06	765059	1.10038e+06	945768	588866	923883	1.3501e+06	1.22746e+06	812611	866481	812162	934385	534328	1.35434e+06	666527	918435	607006	672356	998270	724761	7.03537e+06	1.06603e+07	1.21715e+07	1.58813e+07	1.62564e+07
(R)-lipoic acid	0.339471	B(iii)			93.7783	205.035	forward	1.69219e+06	2.13214e+06	1.6656e+06	2.58301e+06	2.41998e+06	2.34065e+06	1.96084e+06	1.78433e+06	2.61375e+06	2.72187e+06	2.44075e+06	2.47646e+06	3.01349e+06	1.97859e+06	2.40285e+06	2.29369e+06	2.36159e+06	2.5077e+06	1.9397e+06	3.23643e+06	4.06046e+06	2.12432e+06	2.11719e+06	2.55975e+06	4.57703e+06	2.20753e+06	3.72732e+06	2.54212e+06	2.76775e+06	1.40341e+07	1.34123e+06	453487	2.52679e+06	2.95494e+06	3.44323e+06	3.96282e+06	3.32542e+06
Tromethamine	0.33922	B(iii)			310.881	122.081	forward	1.08642e+07	9.75914e+06	1.16593e+07	1.03264e+07	8.09425e+07	1.07998e+07	1.95079e+07	7.79938e+06	8.60225e+06	9.12018e+06	1.17449e+07	1.30576e+07	1.0376e+07	1.06358e+07	9.23186e+06	1.40077e+07	8.97259e+06	1.19015e+07	9.76081e+06	1.01666e+07	8.1643e+06	9.48898e+06	1.01501e+07	9.20738e+06	2.4281e+07	8.31376e+06	1.14437e+07	1.09457e+07	8.7056e+06	1.3741e+07	8.54101e+06	7.39211e+06	8.81952e+06	1.17029e+07	1.18289e+07	1.18623e+07	1.21997e+07
Piperettine	0.337029	B(iii)			448.983	312.167	forward	6.18217e+06	2.78851e+06	5.87532e+06	6.40071e+06	3.78168e+06	3.36016e+06	4.82047e+06	5.49795e+06	4.65544e+06	5.64324e+06	3.88629e+06	2.46666e+06	3.59429e+06	9.00561e+06	3.74581e+06	6.55483e+06	8.06657e+06	4.18121e+06	6.31211e+06	5.31809e+06	5.60445e+06	7.08109e+06	3.86041e+06	3.29189e+06	3.08563e+06	6.09945e+06	2.33724e+06	3.84599e+06	2.57319e+06	3.33084e+06	6.54135e+06	4.08499e+06	4.13227e+06	5.46594e+06	5.16646e+06	4.9939e+06	5.47792e+06
D-Glucuronic acid	0.334721	B(iii)			368.733	193.035	forward	1.99781e+06	2.58817e+06	2.79064e+06	3.52345e+06	2.40456e+06	1.95473e+06	4.8289e+06	2.24162e+06	4.03833e+06	6.74973e+06	2.41145e+06	3.09813e+06	2.72842e+06	3.45175e+06	2.14318e+06	2.60039e+06	2.29298e+06	2.29159e+06	2.4878e+06	2.6858e+06	2.70104e+06	6.61272e+06	1.91138e+06	5.61498e+06	5.89276e+06	2.54114e+06	2.62334e+06	2.51521e+06	3.6653e+06	7.5696e+06	2.4026e+06	2.63079e+06	2.89192e+06	2.66575e+06	3.04565e+06	2.13434e+06	2.76722e+06
Cyclic GMP	0.334208	B(iii)			469.226	344.04	forward	3.76824e+06	3.51747e+06	3.88857e+06	5.35981e+06	4.06756e+06	3.80004e+06	5.73815e+06	2.77547e+06	3.84754e+06	5.64727e+06	5.51131e+06	4.68789e+06	4.1327e+06	4.85147e+06	4.27059e+06	3.85538e+06	5.82949e+06	3.89064e+06	5.3254e+06	5.42426e+06	4.91002e+06	5.5622e+06	5.1261e+06	6.13384e+06	3.74287e+06	3.92436e+06	5.47154e+06	4.86341e+06	4.66763e+06	3.86901e+06	5.99122e+06	2.92411e+06	3.56134e+06	3.92307e+06	5.13758e+06	4.54937e+06	3.83894e+06
(2R,3R,4R)-2-Amino-4-hydroxy-3-methylpentanoic acid	0.332893	B(iii)			317.628	148.097	forward	4.98153e+07	3.48678e+07	3.58671e+07	8.74036e+07	2.16682e+07	4.56168e+07	5.0786e+07	3.08591e+07	4.59762e+07	6.02259e+07	6.62967e+07	5.52956e+07	5.46347e+07	6.05964e+07	4.93452e+07	7.70886e+07	5.22711e+07	3.3168e+07	4.40722e+07	8.88575e+07	6.96782e+07	7.46687e+07	5.08678e+07	4.83904e+07	7.13263e+07	2.09983e+07	5.68961e+07	1.00202e+08	2.19089e+07	6.97301e+07	3.43977e+07	2.94315e+07	4.71317e+07	5.88671e+07	5.44015e+07	5.40428e+07	5.55725e+07
Cervonyl carnitine	0.331326	B(iii)			194.778	472.343	forward	490862	677425	684580	982101	3.57749e+06	649500	1.00967e+07	1.49417e+06	4.65974e+06	5.80623e+06	2.3186e+06	1.32134e+06	7.96622e+06	1.14723e+07	1.81545e+07	3.75863e+06	486523	260137	1.05764e+06	698949	2.13041e+06	965956	961706	771685	4.43842e+06	5.93894e+06	5.41453e+06	4.39823e+06	3.30693e+06	2.88756e+06	2.96688e+06	632060	3.97995e+06	3.84656e+06	3.65461e+06	3.69587e+06	3.86376e+06
dTDP	0.331277	B(iii)			454.26	401.026	forward	6.13169e+06	6.10765e+06	5.97304e+06	4.25056e+06	5.7057e+06	5.06017e+06	4.97419e+06	6.64157e+06	7.38572e+06	4.20726e+06	5.30787e+06	4.61833e+06	4.74611e+06	6.42104e+06	6.58007e+06	5.77258e+06	4.14653e+06	8.36189e+06	3.84917e+06	5.52651e+06	5.02467e+06	2.65831e+06	5.12438e+06	3.31762e+06	1.08636e+06	4.43518e+06	4.92415e+06	4.73183e+06	5.76119e+06	4.90541e+06	3.47234e+06	5.25434e+06	5.53196e+06	5.95349e+06	5.78754e+06	5.87156e+06	5.78466e+06
N-Methylcalystegine B2	0.329784	B(iii)			275.572	190.107	forward	318976	689656	1.03058e+06	1.75128e+06	2.41195e+06	823897	1.1011e+06	1.08627e+06	1.21967e+06	650596	771181	947204	486619	1.39909e+06	1.39753e+06	916469	487918	1.00062e+06	787005	728898	2.72071e+06	592431	772065	1.26997e+06	706469	901825	714695	2.02349e+06	1.03158e+06	978422	926032	1.19926e+06	1.09424e+06	1.05673e+06	1.11417e+06	1.26129e+06	1.17821e+06
[truncated: 9,756 more rows]
